# Supplementary material for: Long-Term Effects of Nitrogen Sources on Yields, Nitrogen Use Efficiencies, and Soil
Source: Preprints.org preprint supplement (doi:10.20944/preprints202409.1237.v1), 2024-09-18
Supplement: Supplementary file 1 [file supplementary]

## Sheet: ANOVA Summary
Table S6. ANOVA analysis with LSD mean separation from 2012 to 2017 by sampling date and soil depth sub-segment with response variables, which are expressed in equivalent soil mass. Respective dataset from 2012 to 2017 is included.
Sampling_Date	Depth_Segment	Response_Variable	Number_Of_Observations	Term	Degrees_Of_Freedom	Sum_Of_Squares	Mean_Square	F_statistic	P_value	Column1	Column2
2012-02-01	0-7.6 cm	EquivSeg_Ammonium_N_kg_per_ha	20	Treatment_Level	4	4.28094	1.07023	0.839496	0.522687
2012-02-01	0-7.6 cm	EquivSeg_Ammonium_N_kg_per_ha	20	Block	1	16.3839	16.3839	12.8516	0.00298659
2012-02-01	0-7.6 cm	EquivSeg_Ammonium_N_kg_per_ha	20	Residuals	14	17.8479	1.27485
2012-02-01	7.6-15 cm	EquivSeg_Ammonium_N_kg_per_ha	20	Treatment_Level	4	5.47449	1.36862	0.753016	0.572434
2012-02-01	7.6-15 cm	EquivSeg_Ammonium_N_kg_per_ha	20	Block	1	24.4194	24.4194	13.4356	0.00254568
2012-02-01	7.6-15 cm	EquivSeg_Ammonium_N_kg_per_ha	20	Residuals	14	25.4453	1.81752
2012-02-01	15-30 cm	EquivSeg_Ammonium_N_kg_per_ha	20	Treatment_Level	4	8.23563	2.05891	0.328624	0.854129
2012-02-01	15-30 cm	EquivSeg_Ammonium_N_kg_per_ha	20	Block	1	80.0817	80.0817	12.7819	0.00304485
2012-02-01	15-30 cm	EquivSeg_Ammonium_N_kg_per_ha	20	Residuals	14	87.7134	6.26524
2012-02-01	30-61 cm	EquivSeg_Ammonium_N_kg_per_ha	20	Treatment_Level	4	60.9376	15.2344	0.775102	0.559387
2012-02-01	30-61 cm	EquivSeg_Ammonium_N_kg_per_ha	20	Block	1	7.33406	7.33406	0.373146	0.551084
2012-02-01	30-61 cm	EquivSeg_Ammonium_N_kg_per_ha	20	Residuals	14	275.166	19.6547
2012-02-01	61-91 cm	EquivSeg_Ammonium_N_kg_per_ha	20	Treatment_Level	4	21.514	5.37849	0.427833	0.786186
2012-02-01	61-91 cm	EquivSeg_Ammonium_N_kg_per_ha	20	Block	1	31.3142	31.3142	2.4909	0.136829
2012-02-01	61-91 cm	EquivSeg_Ammonium_N_kg_per_ha	20	Residuals	14	176.001	12.5715
2012-02-01	91-120 cm	EquivSeg_Ammonium_N_kg_per_ha	20	Treatment_Level	4	8.39926	2.09981	0.277954	0.88735
2012-02-01	91-120 cm	EquivSeg_Ammonium_N_kg_per_ha	20	Block	1	21.9755	21.9755	2.90892	0.110168
2012-02-01	91-120 cm	EquivSeg_Ammonium_N_kg_per_ha	20	Residuals	14	105.764	7.55454
2012-02-01	120-150 cm	EquivSeg_Ammonium_N_kg_per_ha	20	Treatment_Level	4	6.51016	1.62754	0.170795	0.949728
2012-02-01	120-150 cm	EquivSeg_Ammonium_N_kg_per_ha	20	Block	1	43.5892	43.5892	4.57429	0.0505639
2012-02-01	120-150 cm	EquivSeg_Ammonium_N_kg_per_ha	20	Residuals	14	133.409	9.52919
2012-02-01	150-180 cm	EquivSeg_Ammonium_N_kg_per_ha	20	Treatment_Level	4	90.2571	22.5643	1.18221	0.360909
2012-02-01	150-180 cm	EquivSeg_Ammonium_N_kg_per_ha	20	Block	1	95.4002	95.4002	4.99829	0.0421761
2012-02-01	150-180 cm	EquivSeg_Ammonium_N_kg_per_ha	20	Residuals	14	267.212	19.0866
2012-11-16	0-7.6 cm	EquivSeg_Ammonium_N_kg_per_ha	20	Treatment_Level	4	30.0996	7.52491	2.59929	0.0816108
2012-11-16	0-7.6 cm	EquivSeg_Ammonium_N_kg_per_ha	20	Block	1	42.0987	42.0987	14.5419	0.00189993
2012-11-16	0-7.6 cm	EquivSeg_Ammonium_N_kg_per_ha	20	Residuals	14	40.5299	2.89499
2012-11-16	7.6-15 cm	EquivSeg_Ammonium_N_kg_per_ha	20	Treatment_Level	4	8.45131	2.11283	0.234051	0.914542
2012-11-16	7.6-15 cm	EquivSeg_Ammonium_N_kg_per_ha	20	Block	1	31.7949	31.7949	3.52211	0.0815545
2012-11-16	7.6-15 cm	EquivSeg_Ammonium_N_kg_per_ha	20	Residuals	14	126.381	9.02722
2012-11-16	15-30 cm	EquivSeg_Ammonium_N_kg_per_ha	20	Treatment_Level	4	73.6171	18.4043	2.26753	0.113716
2012-11-16	15-30 cm	EquivSeg_Ammonium_N_kg_per_ha	20	Block	1	23.2556	23.2556	2.86523	0.112638
2012-11-16	15-30 cm	EquivSeg_Ammonium_N_kg_per_ha	20	Residuals	14	113.63	8.11646
2012-11-16	30-61 cm	EquivSeg_Ammonium_N_kg_per_ha	20	Treatment_Level	4	1190	297.5	1.29683	0.318465
2012-11-16	30-61 cm	EquivSeg_Ammonium_N_kg_per_ha	20	Block	1	23.0008	23.0008	0.100263	0.756187
2012-11-16	30-61 cm	EquivSeg_Ammonium_N_kg_per_ha	20	Residuals	14	3211.67	229.405
2012-11-16	61-91 cm	EquivSeg_Ammonium_N_kg_per_ha	20	Treatment_Level	4	46.9713	11.7428	0.0972479	0.98164
2012-11-16	61-91 cm	EquivSeg_Ammonium_N_kg_per_ha	20	Block	1	19.4201	19.4201	0.160827	0.69445
2012-11-16	61-91 cm	EquivSeg_Ammonium_N_kg_per_ha	20	Residuals	14	1690.52	120.752
2012-11-16	91-120 cm	EquivSeg_Ammonium_N_kg_per_ha	20	Treatment_Level	4	246.196	61.549	0.420738	0.7911
2012-11-16	91-120 cm	EquivSeg_Ammonium_N_kg_per_ha	20	Block	1	1.22542	1.22542	0.00837678	0.928372
2012-11-16	91-120 cm	EquivSeg_Ammonium_N_kg_per_ha	20	Residuals	14	2048.04	146.288
2012-11-16	120-150 cm	EquivSeg_Ammonium_N_kg_per_ha	20	Treatment_Level	4	169.173	42.2933	0.56726	0.690579
2012-11-16	120-150 cm	EquivSeg_Ammonium_N_kg_per_ha	20	Block	1	62.6276	62.6276	0.839995	0.374916
2012-11-16	120-150 cm	EquivSeg_Ammonium_N_kg_per_ha	20	Residuals	14	1043.8	74.5572
2012-11-16	150-180 cm	EquivSeg_Ammonium_N_kg_per_ha	20	Treatment_Level	4	878.838	219.709	1.37593	0.29215
2012-11-16	150-180 cm	EquivSeg_Ammonium_N_kg_per_ha	20	Block	1	383.787	383.787	2.40347	0.143372
2012-11-16	150-180 cm	EquivSeg_Ammonium_N_kg_per_ha	20	Residuals	14	2235.52	159.68
2013-11-08	0-7.6 cm	EquivSeg_Ammonium_N_kg_per_ha	20	Treatment_Level	4	15.0214	3.75535	2.3787	0.10162
2013-11-08	0-7.6 cm	EquivSeg_Ammonium_N_kg_per_ha	20	Block	1	0.618553	0.618553	0.391802	0.541425
2013-11-08	0-7.6 cm	EquivSeg_Ammonium_N_kg_per_ha	20	Residuals	14	22.1023	1.57874
2013-11-08	7.6-15 cm	EquivSeg_Ammonium_N_kg_per_ha	20	Treatment_Level	4	2.6441	0.661025	0.652232	0.634794
2013-11-08	7.6-15 cm	EquivSeg_Ammonium_N_kg_per_ha	20	Block	1	1.3268	1.3268	1.30915	0.271735
2013-11-08	7.6-15 cm	EquivSeg_Ammonium_N_kg_per_ha	20	Residuals	14	14.1887	1.01348
2013-11-08	15-30 cm	EquivSeg_Ammonium_N_kg_per_ha	20	Treatment_Level	4	5.27281	1.3182	0.27816	0.887218
2013-11-08	15-30 cm	EquivSeg_Ammonium_N_kg_per_ha	20	Block	1	2.40795	2.40795	0.508112	0.487669
2013-11-08	15-30 cm	EquivSeg_Ammonium_N_kg_per_ha	20	Residuals	14	66.3461	4.739
2013-11-08	30-61 cm	EquivSeg_Ammonium_N_kg_per_ha	20	Treatment_Level	4	11.218	2.80449	0.253861	0.902497
2013-11-08	30-61 cm	EquivSeg_Ammonium_N_kg_per_ha	20	Block	1	6.53186	6.53186	0.591261	0.454709
2013-11-08	30-61 cm	EquivSeg_Ammonium_N_kg_per_ha	20	Residuals	14	154.663	11.0473
2013-11-08	61-91 cm	EquivSeg_Ammonium_N_kg_per_ha	20	Treatment_Level	4	39.7806	9.94516	1.20457	0.352206
2013-11-08	61-91 cm	EquivSeg_Ammonium_N_kg_per_ha	20	Block	1	1.05092	1.05092	0.127289	0.72658
2013-11-08	61-91 cm	EquivSeg_Ammonium_N_kg_per_ha	20	Residuals	14	115.586	8.25617
2013-11-08	91-120 cm	EquivSeg_Ammonium_N_kg_per_ha	20	Treatment_Level	4	34.155	8.53876	1.20612	0.35161
2013-11-08	91-120 cm	EquivSeg_Ammonium_N_kg_per_ha	20	Block	1	1.08352	1.08352	0.15305	0.701526
2013-11-08	91-120 cm	EquivSeg_Ammonium_N_kg_per_ha	20	Residuals	14	99.1131	7.0795
2013-11-08	120-150 cm	EquivSeg_Ammonium_N_kg_per_ha	20	Treatment_Level	4	10.8917	2.72292	0.494538	0.740061
2013-11-08	120-150 cm	EquivSeg_Ammonium_N_kg_per_ha	20	Block	1	37.4988	37.4988	6.81055	0.0205848
2013-11-08	120-150 cm	EquivSeg_Ammonium_N_kg_per_ha	20	Residuals	14	77.0838	5.50598
2013-11-08	150-180 cm	EquivSeg_Ammonium_N_kg_per_ha	20	Treatment_Level	4	6.45133	1.61283	0.205169	0.9313
2013-11-08	150-180 cm	EquivSeg_Ammonium_N_kg_per_ha	20	Block	1	3.01911	3.01911	0.384061	0.545392
2013-11-08	150-180 cm	EquivSeg_Ammonium_N_kg_per_ha	20	Residuals	14	110.054	7.861
2015-11-24	0-7.6 cm	EquivSeg_Ammonium_N_kg_per_ha	20	Treatment_Level	4	8.21109	2.05277	0.83925	0.522823
2015-11-24	0-7.6 cm	EquivSeg_Ammonium_N_kg_per_ha	20	Block	1	160.649	160.649	65.6792	1.17744e-06
2015-11-24	0-7.6 cm	EquivSeg_Ammonium_N_kg_per_ha	20	Residuals	14	34.2435	2.44596
2015-11-24	7.6-15 cm	EquivSeg_Ammonium_N_kg_per_ha	20	Treatment_Level	4	0.77903	0.194757	0.153132	0.95843
2015-11-24	7.6-15 cm	EquivSeg_Ammonium_N_kg_per_ha	20	Block	1	174.655	174.655	137.326	1.26759e-08
2015-11-24	7.6-15 cm	EquivSeg_Ammonium_N_kg_per_ha	20	Residuals	14	17.8056	1.27183
2015-11-24	15-30 cm	EquivSeg_Ammonium_N_kg_per_ha	20	Treatment_Level	4	18.5893	4.64731	1.58037	0.234043
2015-11-24	15-30 cm	EquivSeg_Ammonium_N_kg_per_ha	20	Block	1	191.817	191.817	65.2295	1.22566e-06
2015-11-24	15-30 cm	EquivSeg_Ammonium_N_kg_per_ha	20	Residuals	14	41.1691	2.94065
2015-11-24	30-61 cm	EquivSeg_Ammonium_N_kg_per_ha	19	Treatment_Level	4	356.35	89.0875	0.492223	0.741709
2015-11-24	30-61 cm	EquivSeg_Ammonium_N_kg_per_ha	19	Block	1	518.044	518.044	2.86227	0.114495
2015-11-24	30-61 cm	EquivSeg_Ammonium_N_kg_per_ha	19	Residuals	13	2352.87	180.99
2015-11-24	61-91 cm	EquivSeg_Ammonium_N_kg_per_ha	20	Treatment_Level	4	553.441	138.36	0.997408	0.441258
2015-11-24	61-91 cm	EquivSeg_Ammonium_N_kg_per_ha	20	Block	1	439.861	439.861	3.17086	0.0966648
2015-11-24	61-91 cm	EquivSeg_Ammonium_N_kg_per_ha	20	Residuals	14	1942.08	138.72
2015-11-24	91-120 cm	EquivSeg_Ammonium_N_kg_per_ha	20	Treatment_Level	4	293.026	73.2566	1.452	0.268947
2015-11-24	91-120 cm	EquivSeg_Ammonium_N_kg_per_ha	20	Block	1	492.74	492.74	9.76651	0.0074508
2015-11-24	91-120 cm	EquivSeg_Ammonium_N_kg_per_ha	20	Residuals	14	706.329	50.452
2016-11-16	0-7.6 cm	EquivSeg_Ammonium_N_kg_per_ha	20	Treatment_Level	4	50.5225	12.6306	0.41357	0.796062
2016-11-16	0-7.6 cm	EquivSeg_Ammonium_N_kg_per_ha	20	Block	1	2.66726	2.66726	0.0873353	0.77193
2016-11-16	0-7.6 cm	EquivSeg_Ammonium_N_kg_per_ha	20	Residuals	14	427.567	30.5405
2016-11-16	7.6-15 cm	EquivSeg_Ammonium_N_kg_per_ha	19	Treatment_Level	4	15.5037	3.87593	0.189641	0.939561
2016-11-16	7.6-15 cm	EquivSeg_Ammonium_N_kg_per_ha	19	Block	1	6.63127	6.63127	0.324454	0.578653
2016-11-16	7.6-15 cm	EquivSeg_Ammonium_N_kg_per_ha	19	Residuals	13	265.697	20.4382
2016-11-16	15-30 cm	EquivSeg_Ammonium_N_kg_per_ha	19	Treatment_Level	4	147.557	36.8892	0.562679	0.693971
2016-11-16	15-30 cm	EquivSeg_Ammonium_N_kg_per_ha	19	Block	1	83.3443	83.3443	1.27127	0.27991
2016-11-16	15-30 cm	EquivSeg_Ammonium_N_kg_per_ha	19	Residuals	13	852.279	65.5599
2016-11-16	30-61 cm	EquivSeg_Ammonium_N_kg_per_ha	20	Treatment_Level	4	139.959	34.9896	0.195398	0.936721
2016-11-16	30-61 cm	EquivSeg_Ammonium_N_kg_per_ha	20	Block	1	70.4429	70.4429	0.393386	0.54062
2016-11-16	30-61 cm	EquivSeg_Ammonium_N_kg_per_ha	20	Residuals	14	2506.96	179.068
2016-11-16	61-91 cm	EquivSeg_Ammonium_N_kg_per_ha	20	Treatment_Level	4	236.443	59.1106	0.766932	0.564187
2016-11-16	61-91 cm	EquivSeg_Ammonium_N_kg_per_ha	20	Block	1	328.725	328.725	4.26505	0.0579371
2016-11-16	61-91 cm	EquivSeg_Ammonium_N_kg_per_ha	20	Residuals	14	1079.04	77.0742
2016-11-16	91-120 cm	EquivSeg_Ammonium_N_kg_per_ha	20	Treatment_Level	4	248.494	62.1235	0.685995	0.613406
2016-11-16	91-120 cm	EquivSeg_Ammonium_N_kg_per_ha	20	Block	1	37.3142	37.3142	0.412039	0.531307
2016-11-16	91-120 cm	EquivSeg_Ammonium_N_kg_per_ha	20	Residuals	14	1267.84	90.5598
2016-11-16	120-150 cm	EquivSeg_Ammonium_N_kg_per_ha	16	Treatment_Level	4	717.28	179.32	1.5764	0.254513
2016-11-16	120-150 cm	EquivSeg_Ammonium_N_kg_per_ha	16	Block	1	0.00480609	0.00480609	4.22504e-05	0.994942
2016-11-16	120-150 cm	EquivSeg_Ammonium_N_kg_per_ha	16	Residuals	10	1137.53	113.753
2017-11-13	0-7.6 cm	EquivSeg_Ammonium_N_kg_per_ha	16	Treatment_Level	4	57.3602	14.34	1.46854	0.282766
2017-11-13	0-7.6 cm	EquivSeg_Ammonium_N_kg_per_ha	16	Block	1	23.868	23.868	2.44427	0.14902
2017-11-13	0-7.6 cm	EquivSeg_Ammonium_N_kg_per_ha	16	Residuals	10	97.6485	9.76485
2017-11-13	7.6-15 cm	EquivSeg_Ammonium_N_kg_per_ha	16	Treatment_Level	4	31.2361	7.80904	0.44271	0.775443
2017-11-13	7.6-15 cm	EquivSeg_Ammonium_N_kg_per_ha	16	Block	1	4.92005	4.92005	0.278927	0.608924
2017-11-13	7.6-15 cm	EquivSeg_Ammonium_N_kg_per_ha	16	Residuals	10	176.392	17.6392
2017-11-13	15-30 cm	EquivSeg_Ammonium_N_kg_per_ha	16	Treatment_Level	4	127.884	31.9711	0.861184	0.519251
2017-11-13	15-30 cm	EquivSeg_Ammonium_N_kg_per_ha	16	Block	1	15.8501	15.8501	0.426944	0.52823
2017-11-13	15-30 cm	EquivSeg_Ammonium_N_kg_per_ha	16	Residuals	10	371.246	37.1246
2017-11-13	30-61 cm	EquivSeg_Ammonium_N_kg_per_ha	19	Treatment_Level	4	1173.82	293.455	4.83219	0.0131001
2017-11-13	30-61 cm	EquivSeg_Ammonium_N_kg_per_ha	19	Block	1	1721.94	1721.94	28.3544	0.000137824
2017-11-13	30-61 cm	EquivSeg_Ammonium_N_kg_per_ha	19	Residuals	13	789.478	60.7291
2017-11-13	61-91 cm	EquivSeg_Ammonium_N_kg_per_ha	20	Treatment_Level	4	164.247	41.0618	0.491372	0.74224
2017-11-13	61-91 cm	EquivSeg_Ammonium_N_kg_per_ha	20	Block	1	1126.36	1126.36	13.4788	0.00251612
2017-11-13	61-91 cm	EquivSeg_Ammonium_N_kg_per_ha	20	Residuals	14	1169.92	83.5655
2017-11-13	91-120 cm	EquivSeg_Ammonium_N_kg_per_ha	19	Treatment_Level	4	292.771	73.1927	1.60117	0.232761
2017-11-13	91-120 cm	EquivSeg_Ammonium_N_kg_per_ha	19	Block	1	749.347	749.347	16.3928	0.00137947
2017-11-13	91-120 cm	EquivSeg_Ammonium_N_kg_per_ha	19	Residuals	13	594.255	45.7119
2017-11-13	120-150 cm	EquivSeg_Ammonium_N_kg_per_ha	10	Treatment_Level	3	268.992	89.664	2.28242	0.196624
2017-11-13	120-150 cm	EquivSeg_Ammonium_N_kg_per_ha	10	Block	1	955.483	955.483	24.3221	0.00435303
2017-11-13	120-150 cm	EquivSeg_Ammonium_N_kg_per_ha	10	Residuals	5	196.423	39.2846
2012-02-01	0-7.6 cm	EquivSeg_Extractable_P_kg_per_ha	19	Treatment_Level	4	1468.87	367.219	4.38106	0.0184271
2012-02-01	0-7.6 cm	EquivSeg_Extractable_P_kg_per_ha	19	Block	1	158.888	158.888	1.8956	0.191821
2012-02-01	0-7.6 cm	EquivSeg_Extractable_P_kg_per_ha	19	Residuals	13	1089.65	83.8195
2012-02-01	7.6-15 cm	EquivSeg_Extractable_P_kg_per_ha	20	Treatment_Level	4	45.5366	11.3841	1.85412	0.174665
2012-02-01	7.6-15 cm	EquivSeg_Extractable_P_kg_per_ha	20	Block	1	3.76595	3.76595	0.613353	0.446575
2012-02-01	7.6-15 cm	EquivSeg_Extractable_P_kg_per_ha	20	Residuals	14	85.959	6.13993
2012-02-01	15-30 cm	EquivSeg_Extractable_P_kg_per_ha	20	Treatment_Level	4	10.0948	2.5237	1.2136	0.348751
2012-02-01	15-30 cm	EquivSeg_Extractable_P_kg_per_ha	20	Block	1	2.37588	2.37588	1.14252	0.303205
2012-02-01	15-30 cm	EquivSeg_Extractable_P_kg_per_ha	20	Residuals	14	29.1131	2.07951
2012-11-16	0-7.6 cm	EquivSeg_Extractable_P_kg_per_ha	20	Treatment_Level	4	14943.8	3735.96	12.3933	0.000162221
2012-11-16	0-7.6 cm	EquivSeg_Extractable_P_kg_per_ha	20	Block	1	164.687	164.687	0.546318	0.472038
2012-11-16	0-7.6 cm	EquivSeg_Extractable_P_kg_per_ha	20	Residuals	14	4220.29	301.45
2012-11-16	7.6-15 cm	EquivSeg_Extractable_P_kg_per_ha	20	Treatment_Level	4	6138.14	1534.54	9.07547	0.00078287
2012-11-16	7.6-15 cm	EquivSeg_Extractable_P_kg_per_ha	20	Block	1	0.104768	0.104768	0.000619614	0.980492
2012-11-16	7.6-15 cm	EquivSeg_Extractable_P_kg_per_ha	20	Residuals	14	2367.21	169.086
2012-11-16	15-30 cm	EquivSeg_Extractable_P_kg_per_ha	20	Treatment_Level	4	172.278	43.0696	6.08232	0.00472103
2012-11-16	15-30 cm	EquivSeg_Extractable_P_kg_per_ha	20	Block	1	1.48863	1.48863	0.210226	0.653627
2012-11-16	15-30 cm	EquivSeg_Extractable_P_kg_per_ha	20	Residuals	14	99.1355	7.08111
2013-11-08	0-7.6 cm	EquivSeg_Extractable_P_kg_per_ha	20	Treatment_Level	4	23499.7	5874.92	48.4261	4.75849e-08
2013-11-08	0-7.6 cm	EquivSeg_Extractable_P_kg_per_ha	20	Block	1	186.317	186.317	1.53578	0.235621
2013-11-08	0-7.6 cm	EquivSeg_Extractable_P_kg_per_ha	20	Residuals	14	1698.44	121.317
2013-11-08	7.6-15 cm	EquivSeg_Extractable_P_kg_per_ha	19	Treatment_Level	4	16190.7	4047.67	34.748	7.95078e-07
2013-11-08	7.6-15 cm	EquivSeg_Extractable_P_kg_per_ha	19	Block	1	207.598	207.598	1.78216	0.204792
2013-11-08	7.6-15 cm	EquivSeg_Extractable_P_kg_per_ha	19	Residuals	13	1514.32	116.486
2013-11-08	15-30 cm	EquivSeg_Extractable_P_kg_per_ha	20	Treatment_Level	4	156.403	39.1007	2.01125	0.148084
2013-11-08	15-30 cm	EquivSeg_Extractable_P_kg_per_ha	20	Block	1	118.879	118.879	6.11488	0.0268376
2013-11-08	15-30 cm	EquivSeg_Extractable_P_kg_per_ha	20	Residuals	14	272.174	19.441
2016-11-16	0-7.6 cm	EquivSeg_Extractable_P_kg_per_ha	20	Treatment_Level	4	38909.6	9727.39	25.2118	2.85861e-06
2016-11-16	0-7.6 cm	EquivSeg_Extractable_P_kg_per_ha	20	Block	1	340.682	340.682	0.882993	0.363314
2016-11-16	0-7.6 cm	EquivSeg_Extractable_P_kg_per_ha	20	Residuals	14	5401.57	385.826
2016-11-16	7.6-15 cm	EquivSeg_Extractable_P_kg_per_ha	20	Treatment_Level	4	42835.2	10708.8	23.4515	4.41671e-06
2016-11-16	7.6-15 cm	EquivSeg_Extractable_P_kg_per_ha	20	Block	1	377.913	377.913	0.827603	0.378362
2016-11-16	7.6-15 cm	EquivSeg_Extractable_P_kg_per_ha	20	Residuals	14	6392.9	456.636
2016-11-16	15-30 cm	EquivSeg_Extractable_P_kg_per_ha	20	Treatment_Level	4	2223.79	555.947	11.1458	0.000281638
2016-11-16	15-30 cm	EquivSeg_Extractable_P_kg_per_ha	20	Block	1	9.53512	9.53512	0.191163	0.668619
2016-11-16	15-30 cm	EquivSeg_Extractable_P_kg_per_ha	20	Residuals	14	698.312	49.8794
2012-02-01	0-7.6 cm	EquivSeg_Inorganic_C_kg_per_ha	20	Treatment_Level	4	179289	44822.2	0.012555	0.999647
2012-02-01	0-7.6 cm	EquivSeg_Inorganic_C_kg_per_ha	20	Block	1	9.8435e+06	9.8435e+06	2.75724	0.119038
2012-02-01	0-7.6 cm	EquivSeg_Inorganic_C_kg_per_ha	20	Residuals	14	4.99808e+07	3.57006e+06
2012-02-01	7.6-15 cm	EquivSeg_Inorganic_C_kg_per_ha	20	Treatment_Level	4	74086.1	18521.5	0.00358603	0.999971
2012-02-01	7.6-15 cm	EquivSeg_Inorganic_C_kg_per_ha	20	Block	1	1.17157e+07	1.17157e+07	2.26834	0.154268
2012-02-01	7.6-15 cm	EquivSeg_Inorganic_C_kg_per_ha	20	Residuals	14	7.23087e+07	5.16491e+06
2012-02-01	15-30 cm	EquivSeg_Inorganic_C_kg_per_ha	20	Treatment_Level	4	1.59598e+07	3.98995e+06	0.203082	0.932469
2012-02-01	15-30 cm	EquivSeg_Inorganic_C_kg_per_ha	20	Block	1	13120.4	13120.4	0.000667808	0.979748
2012-02-01	15-30 cm	EquivSeg_Inorganic_C_kg_per_ha	20	Residuals	14	2.75057e+08	1.9647e+07
2012-02-01	30-61 cm	EquivSeg_Inorganic_C_kg_per_ha	20	Treatment_Level	4	5.91894e+08	1.47973e+08	0.775499	0.559155
2012-02-01	30-61 cm	EquivSeg_Inorganic_C_kg_per_ha	20	Block	1	3.39686e+07	3.39686e+07	0.178022	0.679486
2012-02-01	30-61 cm	EquivSeg_Inorganic_C_kg_per_ha	20	Residuals	14	2.67135e+09	1.90811e+08
2012-02-01	61-91 cm	EquivSeg_Inorganic_C_kg_per_ha	20	Treatment_Level	4	1.14925e+08	2.87311e+07	0.615967	0.658282
2012-02-01	61-91 cm	EquivSeg_Inorganic_C_kg_per_ha	20	Block	1	3.56584e+07	3.56584e+07	0.76448	0.396682
2012-02-01	61-91 cm	EquivSeg_Inorganic_C_kg_per_ha	20	Residuals	14	6.53016e+08	4.6644e+07
2012-02-01	91-120 cm	EquivSeg_Inorganic_C_kg_per_ha	20	Treatment_Level	4	4.07219e+07	1.01805e+07	0.41263	0.796712
2012-02-01	91-120 cm	EquivSeg_Inorganic_C_kg_per_ha	20	Block	1	32697.7	32697.7	0.00132529	0.971474
2012-02-01	91-120 cm	EquivSeg_Inorganic_C_kg_per_ha	20	Residuals	14	3.4541e+08	2.46722e+07
2012-11-16	0-7.6 cm	EquivSeg_Inorganic_C_kg_per_ha	20	Treatment_Level	4	259605	64901.1	0.0137719	0.999577
2012-11-16	0-7.6 cm	EquivSeg_Inorganic_C_kg_per_ha	20	Block	1	3.83713e+06	3.83713e+06	0.814232	0.382135
2012-11-16	0-7.6 cm	EquivSeg_Inorganic_C_kg_per_ha	20	Residuals	14	6.59761e+07	4.71258e+06
2012-11-16	7.6-15 cm	EquivSeg_Inorganic_C_kg_per_ha	20	Treatment_Level	4	505445	126361	0.0233989	0.998798
2012-11-16	7.6-15 cm	EquivSeg_Inorganic_C_kg_per_ha	20	Block	1	5.69197e+06	5.69197e+06	1.05401	0.321998
2012-11-16	7.6-15 cm	EquivSeg_Inorganic_C_kg_per_ha	20	Residuals	14	7.56044e+07	5.40031e+06
2012-11-16	15-30 cm	EquivSeg_Inorganic_C_kg_per_ha	20	Treatment_Level	4	5.26139e+06	1.31535e+06	0.0565625	0.993355
2012-11-16	15-30 cm	EquivSeg_Inorganic_C_kg_per_ha	20	Block	1	3.36296e+06	3.36296e+06	0.144614	0.709444
2012-11-16	15-30 cm	EquivSeg_Inorganic_C_kg_per_ha	20	Residuals	14	3.25567e+08	2.32548e+07
2012-11-16	30-61 cm	EquivSeg_Inorganic_C_kg_per_ha	20	Treatment_Level	4	2.99147e+08	7.47868e+07	0.409514	0.798868
2012-11-16	30-61 cm	EquivSeg_Inorganic_C_kg_per_ha	20	Block	1	5.94446e+08	5.94446e+08	3.25503	0.0927565
2012-11-16	30-61 cm	EquivSeg_Inorganic_C_kg_per_ha	20	Residuals	14	2.55673e+09	1.82624e+08
2012-11-16	61-91 cm	EquivSeg_Inorganic_C_kg_per_ha	20	Treatment_Level	4	8.05991e+07	2.01498e+07	0.24794	0.906139
2012-11-16	61-91 cm	EquivSeg_Inorganic_C_kg_per_ha	20	Block	1	2.7037e+08	2.7037e+08	3.32686	0.0895711
2012-11-16	61-91 cm	EquivSeg_Inorganic_C_kg_per_ha	20	Residuals	14	1.13776e+09	8.12688e+07
2012-11-16	91-120 cm	EquivSeg_Inorganic_C_kg_per_ha	20	Treatment_Level	4	6.46871e+07	1.61718e+07	0.410592	0.798122
2012-11-16	91-120 cm	EquivSeg_Inorganic_C_kg_per_ha	20	Block	1	6.72154e+07	6.72154e+07	1.70656	0.212487
2012-11-16	91-120 cm	EquivSeg_Inorganic_C_kg_per_ha	20	Residuals	14	5.5141e+08	3.93864e+07
2013-11-08	0-7.6 cm	EquivSeg_Inorganic_C_kg_per_ha	20	Treatment_Level	4	427947	106987	0.0232425	0.998813
2013-11-08	0-7.6 cm	EquivSeg_Inorganic_C_kg_per_ha	20	Block	1	7.77699e+06	7.77699e+06	1.68953	0.214658
2013-11-08	0-7.6 cm	EquivSeg_Inorganic_C_kg_per_ha	20	Residuals	14	6.44429e+07	4.60306e+06
2013-11-08	7.6-15 cm	EquivSeg_Inorganic_C_kg_per_ha	20	Treatment_Level	4	830147	207537	0.0440631	0.995882
2013-11-08	7.6-15 cm	EquivSeg_Inorganic_C_kg_per_ha	20	Block	1	6.69263e+06	6.69263e+06	1.42094	0.253063
2013-11-08	7.6-15 cm	EquivSeg_Inorganic_C_kg_per_ha	20	Residuals	14	6.59398e+07	4.70999e+06
2013-11-08	15-30 cm	EquivSeg_Inorganic_C_kg_per_ha	20	Treatment_Level	4	1.91754e+07	4.79385e+06	0.214136	0.926209
2013-11-08	15-30 cm	EquivSeg_Inorganic_C_kg_per_ha	20	Block	1	2.6952e+07	2.6952e+07	1.20392	0.291055
2013-11-08	15-30 cm	EquivSeg_Inorganic_C_kg_per_ha	20	Residuals	14	3.13417e+08	2.2387e+07
2013-11-08	30-61 cm	EquivSeg_Inorganic_C_kg_per_ha	20	Treatment_Level	4	2.68744e+08	6.7186e+07	0.654116	0.633588
2013-11-08	30-61 cm	EquivSeg_Inorganic_C_kg_per_ha	20	Block	1	5.61673e+08	5.61673e+08	5.46839	0.0347184
2013-11-08	30-61 cm	EquivSeg_Inorganic_C_kg_per_ha	20	Residuals	14	1.43798e+09	1.02713e+08
2013-11-08	61-91 cm	EquivSeg_Inorganic_C_kg_per_ha	19	Treatment_Level	4	4.08854e+07	1.02213e+07	0.230664	0.916228
2013-11-08	61-91 cm	EquivSeg_Inorganic_C_kg_per_ha	19	Block	1	3.74906e+07	3.74906e+07	0.846046	0.374426
2013-11-08	61-91 cm	EquivSeg_Inorganic_C_kg_per_ha	19	Residuals	13	5.76065e+08	4.43127e+07
2013-11-08	91-120 cm	EquivSeg_Inorganic_C_kg_per_ha	20	Treatment_Level	4	1.66569e+07	4.16422e+06	0.169801	0.950233
2013-11-08	91-120 cm	EquivSeg_Inorganic_C_kg_per_ha	20	Block	1	5.25378e+07	5.25378e+07	2.14229	0.165377
2013-11-08	91-120 cm	EquivSeg_Inorganic_C_kg_per_ha	20	Residuals	14	3.43337e+08	2.45241e+07
2015-11-24	0-7.6 cm	EquivSeg_Inorganic_C_kg_per_ha	20	Treatment_Level	4	1.34651e+06	336628	0.0552183	0.993653
2015-11-24	0-7.6 cm	EquivSeg_Inorganic_C_kg_per_ha	20	Block	1	7.42478e+06	7.42478e+06	1.21791	0.288379
2015-11-24	0-7.6 cm	EquivSeg_Inorganic_C_kg_per_ha	20	Residuals	14	8.53484e+07	6.09631e+06
2015-11-24	7.6-15 cm	EquivSeg_Inorganic_C_kg_per_ha	20	Treatment_Level	4	1.23216e+06	308039	0.0426804	0.996127
2015-11-24	7.6-15 cm	EquivSeg_Inorganic_C_kg_per_ha	20	Block	1	9.56053e+06	9.56053e+06	1.32466	0.269036
2015-11-24	7.6-15 cm	EquivSeg_Inorganic_C_kg_per_ha	20	Residuals	14	1.01043e+08	7.21735e+06
2015-11-24	15-30 cm	EquivSeg_Inorganic_C_kg_per_ha	20	Treatment_Level	4	1.1323e+07	2.83075e+06	0.10775	0.977846
2015-11-24	15-30 cm	EquivSeg_Inorganic_C_kg_per_ha	20	Block	1	1.23265e+07	1.23265e+07	0.469201	0.504539
2015-11-24	15-30 cm	EquivSeg_Inorganic_C_kg_per_ha	20	Residuals	14	3.67799e+08	2.62714e+07
2015-11-24	30-61 cm	EquivSeg_Inorganic_C_kg_per_ha	19	Treatment_Level	4	3.26005e+08	8.15013e+07	0.651326	0.63607
2015-11-24	30-61 cm	EquivSeg_Inorganic_C_kg_per_ha	19	Block	1	4.14337e+08	4.14337e+08	3.31121	0.0919048
2015-11-24	30-61 cm	EquivSeg_Inorganic_C_kg_per_ha	19	Residuals	13	1.62671e+09	1.25131e+08
2015-11-24	61-91 cm	EquivSeg_Inorganic_C_kg_per_ha	20	Treatment_Level	4	4.11077e+06	1.02769e+06	0.0132827	0.999606
2015-11-24	61-91 cm	EquivSeg_Inorganic_C_kg_per_ha	20	Block	1	2.22709e+08	2.22709e+08	2.87846	0.111883
2015-11-24	61-91 cm	EquivSeg_Inorganic_C_kg_per_ha	20	Residuals	14	1.08319e+09	7.73707e+07
2015-11-24	91-120 cm	EquivSeg_Inorganic_C_kg_per_ha	19	Treatment_Level	4	1.71464e+08	4.2866e+07	2.16864	0.129846
2015-11-24	91-120 cm	EquivSeg_Inorganic_C_kg_per_ha	19	Block	1	7.22259e+07	7.22259e+07	3.65399	0.0782313
2015-11-24	91-120 cm	EquivSeg_Inorganic_C_kg_per_ha	19	Residuals	13	2.56962e+08	1.97663e+07
2016-11-16	0-7.6 cm	EquivSeg_Inorganic_C_kg_per_ha	20	Treatment_Level	4	258429	64607.2	0.0143333	0.999542
2016-11-16	0-7.6 cm	EquivSeg_Inorganic_C_kg_per_ha	20	Block	1	7.09278e+06	7.09278e+06	1.57355	0.230232
2016-11-16	0-7.6 cm	EquivSeg_Inorganic_C_kg_per_ha	20	Residuals	14	6.3105e+07	4.5075e+06
2016-11-16	7.6-15 cm	EquivSeg_Inorganic_C_kg_per_ha	20	Treatment_Level	4	815953	203988	0.040133	0.996561
2016-11-16	7.6-15 cm	EquivSeg_Inorganic_C_kg_per_ha	20	Block	1	6.50483e+06	6.50483e+06	1.27977	0.276948
2016-11-16	7.6-15 cm	EquivSeg_Inorganic_C_kg_per_ha	20	Residuals	14	7.11593e+07	5.08281e+06
2016-11-16	15-30 cm	EquivSeg_Inorganic_C_kg_per_ha	20	Treatment_Level	4	3.03668e+07	7.59171e+06	0.25708	0.900502
2016-11-16	15-30 cm	EquivSeg_Inorganic_C_kg_per_ha	20	Block	1	2.41197e+07	2.41197e+07	0.816775	0.381413
2016-11-16	15-30 cm	EquivSeg_Inorganic_C_kg_per_ha	20	Residuals	14	4.13427e+08	2.95305e+07
2016-11-16	30-61 cm	EquivSeg_Inorganic_C_kg_per_ha	20	Treatment_Level	4	2.35703e+08	5.89257e+07	0.641713	0.641554
2016-11-16	30-61 cm	EquivSeg_Inorganic_C_kg_per_ha	20	Block	1	1.82484e+08	1.82484e+08	1.98729	0.180452
2016-11-16	30-61 cm	EquivSeg_Inorganic_C_kg_per_ha	20	Residuals	14	1.28556e+09	9.18257e+07
2016-11-16	61-91 cm	EquivSeg_Inorganic_C_kg_per_ha	20	Treatment_Level	4	1.26846e+08	3.17115e+07	0.810972	0.538695
2016-11-16	61-91 cm	EquivSeg_Inorganic_C_kg_per_ha	20	Block	1	2.36286e+07	2.36286e+07	0.604264	0.449892
2016-11-16	61-91 cm	EquivSeg_Inorganic_C_kg_per_ha	20	Residuals	14	5.47443e+08	3.91031e+07
2016-11-16	91-120 cm	EquivSeg_Inorganic_C_kg_per_ha	20	Treatment_Level	4	6.07318e+07	1.51829e+07	1.58233	0.233549
2016-11-16	91-120 cm	EquivSeg_Inorganic_C_kg_per_ha	20	Block	1	3.72654e+07	3.72654e+07	3.88371	0.0688597
2016-11-16	91-120 cm	EquivSeg_Inorganic_C_kg_per_ha	20	Residuals	14	1.34334e+08	9.59531e+06
2017-11-13	0-7.6 cm	EquivSeg_Inorganic_C_kg_per_ha	19	Treatment_Level	4	5.00052e+06	1.25013e+06	0.255337	0.901241
2017-11-13	0-7.6 cm	EquivSeg_Inorganic_C_kg_per_ha	19	Block	1	1.80445e+06	1.80445e+06	0.368555	0.554249
2017-11-13	0-7.6 cm	EquivSeg_Inorganic_C_kg_per_ha	19	Residuals	13	6.3648e+07	4.896e+06
2017-11-13	7.6-15 cm	EquivSeg_Inorganic_C_kg_per_ha	20	Treatment_Level	4	1.08059e+06	270148	0.0504708	0.994655
2017-11-13	7.6-15 cm	EquivSeg_Inorganic_C_kg_per_ha	20	Block	1	4.11597e+06	4.11597e+06	0.768972	0.395334
2017-11-13	7.6-15 cm	EquivSeg_Inorganic_C_kg_per_ha	20	Residuals	14	7.49358e+07	5.35256e+06
2017-11-13	15-30 cm	EquivSeg_Inorganic_C_kg_per_ha	19	Treatment_Level	4	2.4153e+07	6.03826e+06	0.237915	0.911889
2017-11-13	15-30 cm	EquivSeg_Inorganic_C_kg_per_ha	19	Block	1	1.31045e+07	1.31045e+07	0.516334	0.485125
2017-11-13	15-30 cm	EquivSeg_Inorganic_C_kg_per_ha	19	Residuals	13	3.29939e+08	2.53799e+07
2017-11-13	30-61 cm	EquivSeg_Inorganic_C_kg_per_ha	19	Treatment_Level	4	1.09278e+08	2.73196e+07	0.250009	0.90453
2017-11-13	30-61 cm	EquivSeg_Inorganic_C_kg_per_ha	19	Block	1	2.06425e+08	2.06425e+08	1.88905	0.19254
2017-11-13	30-61 cm	EquivSeg_Inorganic_C_kg_per_ha	19	Residuals	13	1.42057e+09	1.09275e+08
2017-11-13	61-91 cm	EquivSeg_Inorganic_C_kg_per_ha	18	Treatment_Level	4	3.15554e+06	788886	0.00792258	0.999856
2017-11-13	61-91 cm	EquivSeg_Inorganic_C_kg_per_ha	18	Block	1	1.06957e+08	1.06957e+08	1.07414	0.320446
2017-11-13	61-91 cm	EquivSeg_Inorganic_C_kg_per_ha	18	Residuals	12	1.19489e+09	9.95743e+07
2017-11-13	91-120 cm	EquivSeg_Inorganic_C_kg_per_ha	19	Treatment_Level	4	7.98147e+07	1.99537e+07	0.450115	0.770673
2017-11-13	91-120 cm	EquivSeg_Inorganic_C_kg_per_ha	19	Block	1	1.12376e+08	1.12376e+08	2.53497	0.135363
2017-11-13	91-120 cm	EquivSeg_Inorganic_C_kg_per_ha	19	Residuals	13	5.76292e+08	4.43301e+07
2012-02-01	0-7.6 cm	EquivSeg_Inorganic_N_kg_per_ha	20	Treatment_Level	4	25.6436	6.41089	0.716508	0.5945
2012-02-01	0-7.6 cm	EquivSeg_Inorganic_N_kg_per_ha	20	Block	1	21.6574	21.6574	2.42053	0.142066
2012-02-01	0-7.6 cm	EquivSeg_Inorganic_N_kg_per_ha	20	Residuals	14	125.264	8.9474
2012-02-01	7.6-15 cm	EquivSeg_Inorganic_N_kg_per_ha	20	Treatment_Level	4	5.00134	1.25034	0.400848	0.804857
2012-02-01	7.6-15 cm	EquivSeg_Inorganic_N_kg_per_ha	20	Block	1	17.4916	17.4916	5.60766	0.0328138
2012-02-01	7.6-15 cm	EquivSeg_Inorganic_N_kg_per_ha	20	Residuals	14	43.6692	3.11923
2012-02-01	15-30 cm	EquivSeg_Inorganic_N_kg_per_ha	20	Treatment_Level	4	8.91256	2.22814	0.178962	0.945519
2012-02-01	15-30 cm	EquivSeg_Inorganic_N_kg_per_ha	20	Block	1	65.5262	65.5262	5.26301	0.0377686
2012-02-01	15-30 cm	EquivSeg_Inorganic_N_kg_per_ha	20	Residuals	14	174.305	12.4503
2012-02-01	30-61 cm	EquivSeg_Inorganic_N_kg_per_ha	20	Treatment_Level	4	88.9836	22.2459	0.865634	0.508366
2012-02-01	30-61 cm	EquivSeg_Inorganic_N_kg_per_ha	20	Block	1	2.87289	2.87289	0.11179	0.743071
2012-02-01	30-61 cm	EquivSeg_Inorganic_N_kg_per_ha	20	Residuals	14	359.786	25.699
2012-02-01	61-91 cm	EquivSeg_Inorganic_N_kg_per_ha	20	Treatment_Level	4	41.0808	10.2702	0.691052	0.610244
2012-02-01	61-91 cm	EquivSeg_Inorganic_N_kg_per_ha	20	Block	1	28.7337	28.7337	1.9334	0.186096
2012-02-01	61-91 cm	EquivSeg_Inorganic_N_kg_per_ha	20	Residuals	14	208.064	14.8617
2012-02-01	91-120 cm	EquivSeg_Inorganic_N_kg_per_ha	20	Treatment_Level	4	22.8116	5.7029	0.390303	0.812131
2012-02-01	91-120 cm	EquivSeg_Inorganic_N_kg_per_ha	20	Block	1	26.0679	26.0679	1.78407	0.202959
2012-02-01	91-120 cm	EquivSeg_Inorganic_N_kg_per_ha	20	Residuals	14	204.561	14.6115
2012-02-01	120-150 cm	EquivSeg_Inorganic_N_kg_per_ha	20	Treatment_Level	4	275.332	68.8329	0.728157	0.587392
2012-02-01	120-150 cm	EquivSeg_Inorganic_N_kg_per_ha	20	Block	1	265.018	265.018	2.80353	0.116242
2012-02-01	120-150 cm	EquivSeg_Inorganic_N_kg_per_ha	20	Residuals	14	1323.43	94.5304
2012-02-01	150-180 cm	EquivSeg_Inorganic_N_kg_per_ha	20	Treatment_Level	4	782.929	195.732	1.0124	0.434155
2012-02-01	150-180 cm	EquivSeg_Inorganic_N_kg_per_ha	20	Block	1	567.264	567.264	2.93409	0.108775
2012-02-01	150-180 cm	EquivSeg_Inorganic_N_kg_per_ha	20	Residuals	14	2706.69	193.335
2012-11-16	0-7.6 cm	EquivSeg_Inorganic_N_kg_per_ha	20	Treatment_Level	4	447.296	111.824	1.44865	0.269929
2012-11-16	0-7.6 cm	EquivSeg_Inorganic_N_kg_per_ha	20	Block	1	29.336	29.336	0.38004	0.547476
2012-11-16	0-7.6 cm	EquivSeg_Inorganic_N_kg_per_ha	20	Residuals	14	1080.69	77.192
2012-11-16	7.6-15 cm	EquivSeg_Inorganic_N_kg_per_ha	20	Treatment_Level	4	348.625	87.1561	2.14121	0.129417
2012-11-16	7.6-15 cm	EquivSeg_Inorganic_N_kg_per_ha	20	Block	1	12.3606	12.3606	0.303669	0.590278
2012-11-16	7.6-15 cm	EquivSeg_Inorganic_N_kg_per_ha	20	Residuals	14	569.858	40.7041
2012-11-16	15-30 cm	EquivSeg_Inorganic_N_kg_per_ha	20	Treatment_Level	4	318.852	79.713	0.822716	0.532056
2012-11-16	15-30 cm	EquivSeg_Inorganic_N_kg_per_ha	20	Block	1	1.65572	1.65572	0.0170887	0.897854
2012-11-16	15-30 cm	EquivSeg_Inorganic_N_kg_per_ha	20	Residuals	14	1356.46	96.8901
2012-11-16	30-61 cm	EquivSeg_Inorganic_N_kg_per_ha	20	Treatment_Level	4	1256.16	314.039	1.03308	0.424531
2012-11-16	30-61 cm	EquivSeg_Inorganic_N_kg_per_ha	20	Block	1	15.7871	15.7871	0.051934	0.823026
2012-11-16	30-61 cm	EquivSeg_Inorganic_N_kg_per_ha	20	Residuals	14	4255.77	303.984
2012-11-16	61-91 cm	EquivSeg_Inorganic_N_kg_per_ha	20	Treatment_Level	4	292.397	73.0992	0.404985	0.801998
2012-11-16	61-91 cm	EquivSeg_Inorganic_N_kg_per_ha	20	Block	1	2.97336	2.97336	0.016473	0.8997
2012-11-16	61-91 cm	EquivSeg_Inorganic_N_kg_per_ha	20	Residuals	14	2526.98	180.498
2012-11-16	91-120 cm	EquivSeg_Inorganic_N_kg_per_ha	20	Treatment_Level	4	445.79	111.447	0.57784	0.683496
2012-11-16	91-120 cm	EquivSeg_Inorganic_N_kg_per_ha	20	Block	1	11.1733	11.1733	0.0579323	0.813283
2012-11-16	91-120 cm	EquivSeg_Inorganic_N_kg_per_ha	20	Residuals	14	2700.16	192.869
2012-11-16	120-150 cm	EquivSeg_Inorganic_N_kg_per_ha	20	Treatment_Level	4	252.593	63.1482	0.853834	0.51479
2012-11-16	120-150 cm	EquivSeg_Inorganic_N_kg_per_ha	20	Block	1	82.5182	82.5182	1.11574	0.308725
2012-11-16	120-150 cm	EquivSeg_Inorganic_N_kg_per_ha	20	Residuals	14	1035.42	73.9583
2012-11-16	150-180 cm	EquivSeg_Inorganic_N_kg_per_ha	18	Treatment_Level	4	678.262	169.565	1.40392	0.291066
2012-11-16	150-180 cm	EquivSeg_Inorganic_N_kg_per_ha	18	Block	1	1094.74	1094.74	9.06391	0.0108502
2012-11-16	150-180 cm	EquivSeg_Inorganic_N_kg_per_ha	18	Residuals	12	1449.36	120.78
2013-11-08	0-7.6 cm	EquivSeg_Inorganic_N_kg_per_ha	20	Treatment_Level	4	398.196	99.549	3.81198	0.0267685
2013-11-08	0-7.6 cm	EquivSeg_Inorganic_N_kg_per_ha	20	Block	1	1.05326	1.05326	0.0403319	0.843721
2013-11-08	0-7.6 cm	EquivSeg_Inorganic_N_kg_per_ha	20	Residuals	14	365.607	26.1148
2013-11-08	7.6-15 cm	EquivSeg_Inorganic_N_kg_per_ha	20	Treatment_Level	4	253.208	63.302	6.19091	0.0043859
2013-11-08	7.6-15 cm	EquivSeg_Inorganic_N_kg_per_ha	20	Block	1	7.18543	7.18543	0.702732	0.415951
2013-11-08	7.6-15 cm	EquivSeg_Inorganic_N_kg_per_ha	20	Residuals	14	143.15	10.225
2013-11-08	15-30 cm	EquivSeg_Inorganic_N_kg_per_ha	20	Treatment_Level	4	531.835	132.959	3.01927	0.0545314
2013-11-08	15-30 cm	EquivSeg_Inorganic_N_kg_per_ha	20	Block	1	49.2785	49.2785	1.11903	0.308039
2013-11-08	15-30 cm	EquivSeg_Inorganic_N_kg_per_ha	20	Residuals	14	616.515	44.0368
2013-11-08	30-61 cm	EquivSeg_Inorganic_N_kg_per_ha	20	Treatment_Level	4	1068.83	267.208	7.08119	0.00246282
2013-11-08	30-61 cm	EquivSeg_Inorganic_N_kg_per_ha	20	Block	1	6.56759	6.56759	0.174045	0.682868
2013-11-08	30-61 cm	EquivSeg_Inorganic_N_kg_per_ha	20	Residuals	14	528.289	37.7349
2013-11-08	61-91 cm	EquivSeg_Inorganic_N_kg_per_ha	20	Treatment_Level	4	617.928	154.482	5.30188	0.00820027
2013-11-08	61-91 cm	EquivSeg_Inorganic_N_kg_per_ha	20	Block	1	6.43352	6.43352	0.2208	0.645666
2013-11-08	61-91 cm	EquivSeg_Inorganic_N_kg_per_ha	20	Residuals	14	407.921	29.1372
2013-11-08	91-120 cm	EquivSeg_Inorganic_N_kg_per_ha	20	Treatment_Level	4	368.183	92.0457	5.7147	0.00609183
2013-11-08	91-120 cm	EquivSeg_Inorganic_N_kg_per_ha	20	Block	1	56.5907	56.5907	3.51346	0.0818911
2013-11-08	91-120 cm	EquivSeg_Inorganic_N_kg_per_ha	20	Residuals	14	225.496	16.1068
2013-11-08	120-150 cm	EquivSeg_Inorganic_N_kg_per_ha	20	Treatment_Level	4	209.149	52.2873	1.20752	0.351075
2013-11-08	120-150 cm	EquivSeg_Inorganic_N_kg_per_ha	20	Block	1	3.84163	3.84163	0.0887185	0.770187
2013-11-08	120-150 cm	EquivSeg_Inorganic_N_kg_per_ha	20	Residuals	14	606.219	43.3014
2013-11-08	150-180 cm	EquivSeg_Inorganic_N_kg_per_ha	20	Treatment_Level	4	161.038	40.2595	1.48635	0.259105
2013-11-08	150-180 cm	EquivSeg_Inorganic_N_kg_per_ha	20	Block	1	20.8173	20.8173	0.768558	0.395458
2013-11-08	150-180 cm	EquivSeg_Inorganic_N_kg_per_ha	20	Residuals	14	379.206	27.0861
2015-11-24	0-7.6 cm	EquivSeg_Inorganic_N_kg_per_ha	19	Treatment_Level	4	78.0429	19.5107	1.49411	0.26069
2015-11-24	0-7.6 cm	EquivSeg_Inorganic_N_kg_per_ha	19	Block	1	263.826	263.826	20.2035	0.000602967
2015-11-24	0-7.6 cm	EquivSeg_Inorganic_N_kg_per_ha	19	Residuals	13	169.759	13.0584
2015-11-24	7.6-15 cm	EquivSeg_Inorganic_N_kg_per_ha	19	Treatment_Level	4	160.022	40.0055	2.53185	0.0909603
2015-11-24	7.6-15 cm	EquivSeg_Inorganic_N_kg_per_ha	19	Block	1	212.787	212.787	13.4668	0.00282884
2015-11-24	7.6-15 cm	EquivSeg_Inorganic_N_kg_per_ha	19	Residuals	13	205.411	15.8009
2015-11-24	15-30 cm	EquivSeg_Inorganic_N_kg_per_ha	20	Treatment_Level	4	812.198	203.049	0.680601	0.61679
2015-11-24	15-30 cm	EquivSeg_Inorganic_N_kg_per_ha	20	Block	1	109.494	109.494	0.367011	0.554333
2015-11-24	15-30 cm	EquivSeg_Inorganic_N_kg_per_ha	20	Residuals	14	4176.74	298.338
2015-11-24	30-61 cm	EquivSeg_Inorganic_N_kg_per_ha	19	Treatment_Level	4	404.982	101.246	0.185086	0.942007
2015-11-24	30-61 cm	EquivSeg_Inorganic_N_kg_per_ha	19	Block	1	731.234	731.234	1.33676	0.268412
2015-11-24	30-61 cm	EquivSeg_Inorganic_N_kg_per_ha	19	Residuals	13	7111.24	547.019
2015-11-24	61-91 cm	EquivSeg_Inorganic_N_kg_per_ha	19	Treatment_Level	4	1320.23	330.059	2.31599	0.112191
2015-11-24	61-91 cm	EquivSeg_Inorganic_N_kg_per_ha	19	Block	1	18.9469	18.9469	0.132949	0.721257
2015-11-24	61-91 cm	EquivSeg_Inorganic_N_kg_per_ha	19	Residuals	13	1852.67	142.513
2015-11-24	91-120 cm	EquivSeg_Inorganic_N_kg_per_ha	19	Treatment_Level	4	215.702	53.9256	0.521413	0.721789
2015-11-24	91-120 cm	EquivSeg_Inorganic_N_kg_per_ha	19	Block	1	347.174	347.174	3.35687	0.0899254
2015-11-24	91-120 cm	EquivSeg_Inorganic_N_kg_per_ha	19	Residuals	13	1344.48	103.422
2016-11-16	0-7.6 cm	EquivSeg_Inorganic_N_kg_per_ha	19	Treatment_Level	4	85.9598	21.4899	0.407889	0.799807
2016-11-16	0-7.6 cm	EquivSeg_Inorganic_N_kg_per_ha	19	Block	1	25.2129	25.2129	0.478551	0.501248
2016-11-16	0-7.6 cm	EquivSeg_Inorganic_N_kg_per_ha	19	Residuals	13	684.916	52.6858
2016-11-16	7.6-15 cm	EquivSeg_Inorganic_N_kg_per_ha	19	Treatment_Level	4	111.812	27.953	1.21009	0.353163
2016-11-16	7.6-15 cm	EquivSeg_Inorganic_N_kg_per_ha	19	Block	1	84.1369	84.1369	3.64229	0.0786555
2016-11-16	7.6-15 cm	EquivSeg_Inorganic_N_kg_per_ha	19	Residuals	13	300.3	23.1
2016-11-16	15-30 cm	EquivSeg_Inorganic_N_kg_per_ha	20	Treatment_Level	4	609.154	152.289	1.2035	0.352617
2016-11-16	15-30 cm	EquivSeg_Inorganic_N_kg_per_ha	20	Block	1	136.977	136.977	1.0825	0.315774
2016-11-16	15-30 cm	EquivSeg_Inorganic_N_kg_per_ha	20	Residuals	14	1771.53	126.538
2016-11-16	30-61 cm	EquivSeg_Inorganic_N_kg_per_ha	20	Treatment_Level	4	555.774	138.944	0.612219	0.660738
2016-11-16	30-61 cm	EquivSeg_Inorganic_N_kg_per_ha	20	Block	1	1.64966	1.64966	0.00726878	0.933264
2016-11-16	30-61 cm	EquivSeg_Inorganic_N_kg_per_ha	20	Residuals	14	3177.31	226.951
2016-11-16	61-91 cm	EquivSeg_Inorganic_N_kg_per_ha	20	Treatment_Level	4	607.499	151.875	1.06933	0.408142
2016-11-16	61-91 cm	EquivSeg_Inorganic_N_kg_per_ha	20	Block	1	167.342	167.342	1.17823	0.296055
2016-11-16	61-91 cm	EquivSeg_Inorganic_N_kg_per_ha	20	Residuals	14	1988.39	142.028
2016-11-16	91-120 cm	EquivSeg_Inorganic_N_kg_per_ha	20	Treatment_Level	4	906.312	226.578	0.882157	0.499487
2016-11-16	91-120 cm	EquivSeg_Inorganic_N_kg_per_ha	20	Block	1	5.33947	5.33947	0.0207886	0.887411
2016-11-16	91-120 cm	EquivSeg_Inorganic_N_kg_per_ha	20	Residuals	14	3595.84	256.846
2016-11-16	120-150 cm	EquivSeg_Inorganic_N_kg_per_ha	16	Treatment_Level	4	1873.65	468.413	1.77857	0.209673
2016-11-16	120-150 cm	EquivSeg_Inorganic_N_kg_per_ha	16	Block	1	21.6309	21.6309	0.0821328	0.780278
2016-11-16	120-150 cm	EquivSeg_Inorganic_N_kg_per_ha	16	Residuals	10	2633.65	263.365
2017-11-13	0-7.6 cm	EquivSeg_Inorganic_N_kg_per_ha	19	Treatment_Level	4	349.468	87.367	1.63053	0.225674
2017-11-13	0-7.6 cm	EquivSeg_Inorganic_N_kg_per_ha	19	Block	1	246.27	246.27	4.59615	0.0515304
2017-11-13	0-7.6 cm	EquivSeg_Inorganic_N_kg_per_ha	19	Residuals	13	696.565	53.5819
2017-11-13	7.6-15 cm	EquivSeg_Inorganic_N_kg_per_ha	19	Treatment_Level	4	344.775	86.1938	1.16005	0.372646
2017-11-13	7.6-15 cm	EquivSeg_Inorganic_N_kg_per_ha	19	Block	1	180.227	180.227	2.42561	0.143369
2017-11-13	7.6-15 cm	EquivSeg_Inorganic_N_kg_per_ha	19	Residuals	13	965.922	74.3017
2017-11-13	15-30 cm	EquivSeg_Inorganic_N_kg_per_ha	18	Treatment_Level	4	409.615	102.404	1.21973	0.353076
2017-11-13	15-30 cm	EquivSeg_Inorganic_N_kg_per_ha	18	Block	1	182.727	182.727	2.17646	0.165886
2017-11-13	15-30 cm	EquivSeg_Inorganic_N_kg_per_ha	18	Residuals	12	1007.47	83.9559
2017-11-13	30-61 cm	EquivSeg_Inorganic_N_kg_per_ha	20	Treatment_Level	4	1290.96	322.741	2.94008	0.0587546
2017-11-13	30-61 cm	EquivSeg_Inorganic_N_kg_per_ha	20	Block	1	2634.4	2634.4	23.9986	0.000234804
2017-11-13	30-61 cm	EquivSeg_Inorganic_N_kg_per_ha	20	Residuals	14	1536.82	109.773
2017-11-13	61-91 cm	EquivSeg_Inorganic_N_kg_per_ha	20	Treatment_Level	4	386.898	96.7245	0.932837	0.473086
2017-11-13	61-91 cm	EquivSeg_Inorganic_N_kg_per_ha	20	Block	1	1085.73	1085.73	10.4711	0.00597803
2017-11-13	61-91 cm	EquivSeg_Inorganic_N_kg_per_ha	20	Residuals	14	1451.64	103.689
2017-11-13	91-120 cm	EquivSeg_Inorganic_N_kg_per_ha	19	Treatment_Level	4	525.448	131.362	1.64155	0.223074
2017-11-13	91-120 cm	EquivSeg_Inorganic_N_kg_per_ha	19	Block	1	944.366	944.366	11.8011	0.00443162
2017-11-13	91-120 cm	EquivSeg_Inorganic_N_kg_per_ha	19	Residuals	13	1040.3	80.0233
2017-11-13	120-150 cm	EquivSeg_Inorganic_N_kg_per_ha	11	Treatment_Level	3	2113.98	704.66	2.51711	0.154868
2017-11-13	120-150 cm	EquivSeg_Inorganic_N_kg_per_ha	11	Block	1	2185.66	2185.66	7.8074	0.0314043
2017-11-13	120-150 cm	EquivSeg_Inorganic_N_kg_per_ha	11	Residuals	6	1679.69	279.948
2012-02-01	7.6-15 cm	EquivSeg_Nitrate_N_kg_per_ha	20	Treatment_Level	4	1.10797	0.276993	0.121396	0.972499
2012-02-01	7.6-15 cm	EquivSeg_Nitrate_N_kg_per_ha	20	Block	1	0.576552	0.576552	0.252681	0.623008
2012-02-01	7.6-15 cm	EquivSeg_Nitrate_N_kg_per_ha	20	Residuals	14	31.9444	2.28174
2012-02-01	15-30 cm	EquivSeg_Nitrate_N_kg_per_ha	20	Treatment_Level	4	6.48665	1.62166	0.160904	0.954672
2012-02-01	15-30 cm	EquivSeg_Nitrate_N_kg_per_ha	20	Block	1	0.729332	0.729332	0.0723653	0.791847
2012-02-01	15-30 cm	EquivSeg_Nitrate_N_kg_per_ha	20	Residuals	14	141.099	10.0785
2012-02-01	30-61 cm	EquivSeg_Nitrate_N_kg_per_ha	20	Treatment_Level	4	19.7428	4.93571	0.425312	0.787932
2012-02-01	30-61 cm	EquivSeg_Nitrate_N_kg_per_ha	20	Block	1	1.02655	1.02655	0.0884579	0.770514
2012-02-01	30-61 cm	EquivSeg_Nitrate_N_kg_per_ha	20	Residuals	14	162.469	11.6049
2012-02-01	61-91 cm	EquivSeg_Nitrate_N_kg_per_ha	20	Treatment_Level	4	5.53702	1.38425	0.526629	0.718073
2012-02-01	61-91 cm	EquivSeg_Nitrate_N_kg_per_ha	20	Block	1	0.0554761	0.0554761	0.0211054	0.886563
2012-02-01	61-91 cm	EquivSeg_Nitrate_N_kg_per_ha	20	Residuals	14	36.7993	2.62852
2012-02-01	91-120 cm	EquivSeg_Nitrate_N_kg_per_ha	20	Treatment_Level	4	21.032	5.25801	0.64422	0.639939
2012-02-01	91-120 cm	EquivSeg_Nitrate_N_kg_per_ha	20	Block	1	0.174615	0.174615	0.0213942	0.885795
2012-02-01	91-120 cm	EquivSeg_Nitrate_N_kg_per_ha	20	Residuals	14	114.265	8.16182
2012-02-01	120-150 cm	EquivSeg_Nitrate_N_kg_per_ha	20	Treatment_Level	4	221.808	55.452	0.699241	0.605148
2012-02-01	120-150 cm	EquivSeg_Nitrate_N_kg_per_ha	20	Block	1	93.6476	93.6476	1.18088	0.295533
2012-02-01	120-150 cm	EquivSeg_Nitrate_N_kg_per_ha	20	Residuals	14	1110.24	79.3031
2012-02-01	150-180 cm	EquivSeg_Nitrate_N_kg_per_ha	20	Treatment_Level	4	374.419	93.6048	0.635213	0.645754
2012-02-01	150-180 cm	EquivSeg_Nitrate_N_kg_per_ha	20	Block	1	197.402	197.402	1.3396	0.266471
2012-02-01	150-180 cm	EquivSeg_Nitrate_N_kg_per_ha	20	Residuals	14	2063.04	147.36
2012-11-16	0-7.6 cm	EquivSeg_Nitrate_N_kg_per_ha	20	Treatment_Level	4	309.18	77.2949	1.08746	0.400171
2012-11-16	0-7.6 cm	EquivSeg_Nitrate_N_kg_per_ha	20	Block	1	1.14934	1.14934	0.0161701	0.900621
2012-11-16	0-7.6 cm	EquivSeg_Nitrate_N_kg_per_ha	20	Residuals	14	995.096	71.0783
2012-11-16	7.6-15 cm	EquivSeg_Nitrate_N_kg_per_ha	20	Treatment_Level	4	312.989	78.2471	2.77825	0.0685708
2012-11-16	7.6-15 cm	EquivSeg_Nitrate_N_kg_per_ha	20	Block	1	4.50686	4.50686	0.160021	0.695174
2012-11-16	7.6-15 cm	EquivSeg_Nitrate_N_kg_per_ha	20	Residuals	14	394.298	28.1642
2012-11-16	15-30 cm	EquivSeg_Nitrate_N_kg_per_ha	20	Treatment_Level	4	374.253	93.5632	1.14831	0.374504
2012-11-16	15-30 cm	EquivSeg_Nitrate_N_kg_per_ha	20	Block	1	12.5008	12.5008	0.153424	0.701182
2012-11-16	15-30 cm	EquivSeg_Nitrate_N_kg_per_ha	20	Residuals	14	1140.71	81.479
2012-11-16	30-61 cm	EquivSeg_Nitrate_N_kg_per_ha	20	Treatment_Level	4	485.899	121.475	1.28682	0.321963
2012-11-16	30-61 cm	EquivSeg_Nitrate_N_kg_per_ha	20	Block	1	76.899	76.899	0.814618	0.382025
2012-11-16	30-61 cm	EquivSeg_Nitrate_N_kg_per_ha	20	Residuals	14	1321.58	94.3989
2012-11-16	61-91 cm	EquivSeg_Nitrate_N_kg_per_ha	20	Treatment_Level	4	130.698	32.6746	1.34133	0.303379
2012-11-16	61-91 cm	EquivSeg_Nitrate_N_kg_per_ha	20	Block	1	37.5912	37.5912	1.54316	0.234556
2012-11-16	61-91 cm	EquivSeg_Nitrate_N_kg_per_ha	20	Residuals	14	341.039	24.3599
2012-11-16	91-120 cm	EquivSeg_Nitrate_N_kg_per_ha	20	Treatment_Level	4	38.6159	9.65397	0.997256	0.44133
2012-11-16	91-120 cm	EquivSeg_Nitrate_N_kg_per_ha	20	Block	1	19.7993	19.7993	2.04527	0.174618
2012-11-16	91-120 cm	EquivSeg_Nitrate_N_kg_per_ha	20	Residuals	14	135.527	9.68054
2012-11-16	120-150 cm	EquivSeg_Nitrate_N_kg_per_ha	20	Treatment_Level	4	80.8463	20.2116	1.53674	0.245341
2012-11-16	120-150 cm	EquivSeg_Nitrate_N_kg_per_ha	20	Block	1	1.36935	1.36935	0.104116	0.751714
2012-11-16	120-150 cm	EquivSeg_Nitrate_N_kg_per_ha	20	Residuals	14	184.131	13.1522
2012-11-16	150-180 cm	EquivSeg_Nitrate_N_kg_per_ha	20	Treatment_Level	4	246.797	61.6993	0.690197	0.610778
2012-11-16	150-180 cm	EquivSeg_Nitrate_N_kg_per_ha	20	Block	1	198.563	198.563	2.22122	0.158309
2012-11-16	150-180 cm	EquivSeg_Nitrate_N_kg_per_ha	20	Residuals	14	1251.51	89.3938
2013-03-11	0-7.6 cm	EquivSeg_Nitrate_N_kg_per_ha	20	Treatment_Level	4	512.062	128.016	1.98983	0.151434
2013-03-11	0-7.6 cm	EquivSeg_Nitrate_N_kg_per_ha	20	Block	1	167.411	167.411	2.60219	0.129023
2013-03-11	0-7.6 cm	EquivSeg_Nitrate_N_kg_per_ha	20	Residuals	14	900.688	64.3349
2013-03-11	7.6-15 cm	EquivSeg_Nitrate_N_kg_per_ha	20	Treatment_Level	4	154.22	38.555	2.0545	0.141565
2013-03-11	7.6-15 cm	EquivSeg_Nitrate_N_kg_per_ha	20	Block	1	64.1216	64.1216	3.41688	0.085763
2013-03-11	7.6-15 cm	EquivSeg_Nitrate_N_kg_per_ha	20	Residuals	14	262.726	18.7661
2013-03-11	15-30 cm	EquivSeg_Nitrate_N_kg_per_ha	20	Treatment_Level	4	114.629	28.6573	1.31414	0.312509
2013-03-11	15-30 cm	EquivSeg_Nitrate_N_kg_per_ha	20	Block	1	9.21663	9.21663	0.422648	0.526144
2013-03-11	15-30 cm	EquivSeg_Nitrate_N_kg_per_ha	20	Residuals	14	305.297	21.8069
2013-03-11	30-61 cm	EquivSeg_Nitrate_N_kg_per_ha	20	Treatment_Level	4	257.244	64.3109	3.39312	0.0386821
2013-03-11	30-61 cm	EquivSeg_Nitrate_N_kg_per_ha	20	Block	1	0.0680618	0.0680618	0.00359102	0.953062
2013-03-11	30-61 cm	EquivSeg_Nitrate_N_kg_per_ha	20	Residuals	14	265.347	18.9533
2013-03-11	61-91 cm	EquivSeg_Nitrate_N_kg_per_ha	20	Treatment_Level	4	1.67108	0.417771	0.516296	0.72513
2013-03-11	61-91 cm	EquivSeg_Nitrate_N_kg_per_ha	20	Block	1	0.00159684	0.00159684	0.00197344	0.965194
2013-03-11	61-91 cm	EquivSeg_Nitrate_N_kg_per_ha	20	Residuals	14	11.3284	0.809169
2013-03-11	91-120 cm	EquivSeg_Nitrate_N_kg_per_ha	20	Treatment_Level	4	0.924685	0.231171	0.123447	0.971657
2013-03-11	91-120 cm	EquivSeg_Nitrate_N_kg_per_ha	20	Block	1	0.829087	0.829087	0.442739	0.516616
2013-03-11	91-120 cm	EquivSeg_Nitrate_N_kg_per_ha	20	Residuals	14	26.2168	1.87263
2013-03-11	120-150 cm	EquivSeg_Nitrate_N_kg_per_ha	20	Treatment_Level	4	53.8552	13.4638	0.339589	0.846757
2013-03-11	120-150 cm	EquivSeg_Nitrate_N_kg_per_ha	20	Block	1	182.288	182.288	4.59775	0.0500512
2013-03-11	120-150 cm	EquivSeg_Nitrate_N_kg_per_ha	20	Residuals	14	555.063	39.6473
2013-03-11	150-180 cm	EquivSeg_Nitrate_N_kg_per_ha	20	Treatment_Level	4	207.929	51.9822	0.484708	0.746832
2013-03-11	150-180 cm	EquivSeg_Nitrate_N_kg_per_ha	20	Block	1	714.292	714.292	6.66042	0.0217764
2013-03-11	150-180 cm	EquivSeg_Nitrate_N_kg_per_ha	20	Residuals	14	1501.42	107.244
2013-11-08	0-7.6 cm	EquivSeg_Nitrate_N_kg_per_ha	20	Treatment_Level	4	329.859	82.4647	4.02566	0.0223282
2013-11-08	0-7.6 cm	EquivSeg_Nitrate_N_kg_per_ha	20	Block	1	0.0575054	0.0575054	0.00280722	0.958494
2013-11-08	0-7.6 cm	EquivSeg_Nitrate_N_kg_per_ha	20	Residuals	14	286.787	20.4848
2013-11-08	7.6-15 cm	EquivSeg_Nitrate_N_kg_per_ha	20	Treatment_Level	4	260.875	65.2188	9.22804	0.000722271
2013-11-08	7.6-15 cm	EquivSeg_Nitrate_N_kg_per_ha	20	Block	1	2.33692	2.33692	0.330659	0.574397
2013-11-08	7.6-15 cm	EquivSeg_Nitrate_N_kg_per_ha	20	Residuals	14	98.9444	7.06746
2013-11-08	15-30 cm	EquivSeg_Nitrate_N_kg_per_ha	20	Treatment_Level	4	560.208	140.052	4.622	0.0137522
2013-11-08	15-30 cm	EquivSeg_Nitrate_N_kg_per_ha	20	Block	1	29.9002	29.9002	0.986768	0.337393
2013-11-08	15-30 cm	EquivSeg_Nitrate_N_kg_per_ha	20	Residuals	14	424.217	30.3012
2013-11-08	30-61 cm	EquivSeg_Nitrate_N_kg_per_ha	20	Treatment_Level	4	1213.47	303.369	9.2746	0.000704855
2013-11-08	30-61 cm	EquivSeg_Nitrate_N_kg_per_ha	20	Block	1	26.1989	26.1989	0.800953	0.385937
2013-11-08	30-61 cm	EquivSeg_Nitrate_N_kg_per_ha	20	Residuals	14	457.934	32.7096
2013-11-08	61-91 cm	EquivSeg_Nitrate_N_kg_per_ha	20	Treatment_Level	4	602.431	150.608	12.3436	0.000165693
2013-11-08	61-91 cm	EquivSeg_Nitrate_N_kg_per_ha	20	Block	1	12.6849	12.6849	1.03963	0.325204
2013-11-08	61-91 cm	EquivSeg_Nitrate_N_kg_per_ha	20	Residuals	14	170.818	12.2013
2013-11-08	91-120 cm	EquivSeg_Nitrate_N_kg_per_ha	20	Treatment_Level	4	247.098	61.7745	5.93936	0.00520752
2013-11-08	91-120 cm	EquivSeg_Nitrate_N_kg_per_ha	20	Block	1	42.0132	42.0132	4.0394	0.0641281
2013-11-08	91-120 cm	EquivSeg_Nitrate_N_kg_per_ha	20	Residuals	14	145.612	10.4009
2013-11-08	120-150 cm	EquivSeg_Nitrate_N_kg_per_ha	20	Treatment_Level	4	200.361	50.0903	2.36879	0.102638
2013-11-08	120-150 cm	EquivSeg_Nitrate_N_kg_per_ha	20	Block	1	65.3452	65.3452	3.0902	0.100598
2013-11-08	120-150 cm	EquivSeg_Nitrate_N_kg_per_ha	20	Residuals	14	296.043	21.1459
2013-11-08	150-180 cm	EquivSeg_Nitrate_N_kg_per_ha	20	Treatment_Level	4	160.685	40.1713	2.83036	0.0652234
2013-11-08	150-180 cm	EquivSeg_Nitrate_N_kg_per_ha	20	Block	1	39.6919	39.6919	2.79658	0.116656
2013-11-08	150-180 cm	EquivSeg_Nitrate_N_kg_per_ha	20	Residuals	14	198.702	14.193
2015-03-20	0-7.6 cm	EquivSeg_Nitrate_N_kg_per_ha	20	Treatment_Level	4	1538.14	384.535	3.91415	0.0245318
2015-03-20	0-7.6 cm	EquivSeg_Nitrate_N_kg_per_ha	20	Block	1	83.1051	83.1051	0.84592	0.373285
2015-03-20	0-7.6 cm	EquivSeg_Nitrate_N_kg_per_ha	20	Residuals	14	1375.39	98.2423
2015-03-20	7.6-15 cm	EquivSeg_Nitrate_N_kg_per_ha	20	Treatment_Level	4	939.352	234.838	4.79129	0.0120501
2015-03-20	7.6-15 cm	EquivSeg_Nitrate_N_kg_per_ha	20	Block	1	19.7285	19.7285	0.402512	0.536025
2015-03-20	7.6-15 cm	EquivSeg_Nitrate_N_kg_per_ha	20	Residuals	14	686.189	49.0135
2015-03-20	15-30 cm	EquivSeg_Nitrate_N_kg_per_ha	20	Treatment_Level	4	1189.12	297.279	3.44509	0.0369204
2015-03-20	15-30 cm	EquivSeg_Nitrate_N_kg_per_ha	20	Block	1	0.263407	0.263407	0.00305255	0.95672
2015-03-20	15-30 cm	EquivSeg_Nitrate_N_kg_per_ha	20	Residuals	14	1208.07	86.2908
2015-03-20	30-61 cm	EquivSeg_Nitrate_N_kg_per_ha	20	Treatment_Level	4	1760.88	440.221	3.21527	0.0454655
2015-03-20	30-61 cm	EquivSeg_Nitrate_N_kg_per_ha	20	Block	1	43.9514	43.9514	0.321011	0.579971
2015-03-20	30-61 cm	EquivSeg_Nitrate_N_kg_per_ha	20	Residuals	14	1916.82	136.916
2015-03-20	61-91 cm	EquivSeg_Nitrate_N_kg_per_ha	20	Treatment_Level	4	2586.78	646.696	10.8013	0.000330586
2015-03-20	61-91 cm	EquivSeg_Nitrate_N_kg_per_ha	20	Block	1	13.1553	13.1553	0.219724	0.646466
2015-03-20	61-91 cm	EquivSeg_Nitrate_N_kg_per_ha	20	Residuals	14	838.21	59.8721
2015-03-20	91-120 cm	EquivSeg_Nitrate_N_kg_per_ha	20	Treatment_Level	4	2040.39	510.098	5.55037	0.00684711
2015-03-20	91-120 cm	EquivSeg_Nitrate_N_kg_per_ha	20	Block	1	97.0958	97.0958	1.0565	0.321448
2015-03-20	91-120 cm	EquivSeg_Nitrate_N_kg_per_ha	20	Residuals	14	1286.65	91.9034
2015-03-20	120-150 cm	EquivSeg_Nitrate_N_kg_per_ha	20	Treatment_Level	4	1584.22	396.056	4.23903	0.0187067
2015-03-20	120-150 cm	EquivSeg_Nitrate_N_kg_per_ha	20	Block	1	158.381	158.381	1.69517	0.213936
2015-03-20	120-150 cm	EquivSeg_Nitrate_N_kg_per_ha	20	Residuals	14	1308.03	93.4308
2015-03-20	150-180 cm	EquivSeg_Nitrate_N_kg_per_ha	20	Treatment_Level	4	1087.61	271.903	3.37151	0.0394421
2015-03-20	150-180 cm	EquivSeg_Nitrate_N_kg_per_ha	20	Block	1	1.35462	1.35462	0.0167969	0.898724
2015-03-20	150-180 cm	EquivSeg_Nitrate_N_kg_per_ha	20	Residuals	14	1129.06	80.6471
2015-11-24	0-7.6 cm	EquivSeg_Nitrate_N_kg_per_ha	20	Treatment_Level	4	592.918	148.23	0.806069	0.541487
2015-11-24	0-7.6 cm	EquivSeg_Nitrate_N_kg_per_ha	20	Block	1	152.888	152.888	0.831402	0.377301
2015-11-24	0-7.6 cm	EquivSeg_Nitrate_N_kg_per_ha	20	Residuals	14	2574.49	183.892
2015-11-24	7.6-15 cm	EquivSeg_Nitrate_N_kg_per_ha	20	Treatment_Level	4	278.119	69.5298	0.820378	0.533373
2015-11-24	7.6-15 cm	EquivSeg_Nitrate_N_kg_per_ha	20	Block	1	50.2751	50.2751	0.593193	0.453988
2015-11-24	7.6-15 cm	EquivSeg_Nitrate_N_kg_per_ha	20	Residuals	14	1186.55	84.7534
2015-11-24	15-30 cm	EquivSeg_Nitrate_N_kg_per_ha	20	Treatment_Level	4	1006.14	251.534	0.853789	0.514814
2015-11-24	15-30 cm	EquivSeg_Nitrate_N_kg_per_ha	20	Block	1	11.4643	11.4643	0.0389135	0.846455
2015-11-24	15-30 cm	EquivSeg_Nitrate_N_kg_per_ha	20	Residuals	14	4124.52	294.609
2015-11-24	30-61 cm	EquivSeg_Nitrate_N_kg_per_ha	20	Treatment_Level	4	1123.5	280.875	1.39239	0.286962
2015-11-24	30-61 cm	EquivSeg_Nitrate_N_kg_per_ha	20	Block	1	2.7912	2.7912	0.0138368	0.908032
2015-11-24	30-61 cm	EquivSeg_Nitrate_N_kg_per_ha	20	Residuals	14	2824.11	201.722
2015-11-24	61-91 cm	EquivSeg_Nitrate_N_kg_per_ha	20	Treatment_Level	4	550.501	137.625	1.66032	0.214744
2015-11-24	61-91 cm	EquivSeg_Nitrate_N_kg_per_ha	20	Block	1	557.528	557.528	6.72606	0.0212458
2015-11-24	61-91 cm	EquivSeg_Nitrate_N_kg_per_ha	20	Residuals	14	1160.47	82.8908
2015-11-24	91-120 cm	EquivSeg_Nitrate_N_kg_per_ha	20	Treatment_Level	4	1312.38	328.095	1.27594	0.325809
2015-11-24	91-120 cm	EquivSeg_Nitrate_N_kg_per_ha	20	Block	1	450.826	450.826	1.75324	0.206683
2015-11-24	91-120 cm	EquivSeg_Nitrate_N_kg_per_ha	20	Residuals	14	3599.95	257.139
2016-04-07	0-30 cm	EquivSeg_Nitrate_N_kg_per_ha	20	Treatment_Level	4	4815.15	1203.79	3.18337	0.0468183
2016-04-07	0-30 cm	EquivSeg_Nitrate_N_kg_per_ha	20	Block	1	40.3085	40.3085	0.106594	0.748885
2016-04-07	0-30 cm	EquivSeg_Nitrate_N_kg_per_ha	20	Residuals	14	5294.09	378.149
2016-04-07	30-61 cm	EquivSeg_Nitrate_N_kg_per_ha	20	Treatment_Level	4	1311.11	327.778	4.02844	0.0222762
2016-04-07	30-61 cm	EquivSeg_Nitrate_N_kg_per_ha	20	Block	1	566.573	566.573	6.96327	0.0194497
2016-04-07	30-61 cm	EquivSeg_Nitrate_N_kg_per_ha	20	Residuals	14	1139.12	81.366
2016-04-07	61-91 cm	EquivSeg_Nitrate_N_kg_per_ha	20	Treatment_Level	4	639.639	159.91	1.49687	0.256165
2016-04-07	61-91 cm	EquivSeg_Nitrate_N_kg_per_ha	20	Block	1	230.282	230.282	2.15561	0.164157
2016-04-07	61-91 cm	EquivSeg_Nitrate_N_kg_per_ha	20	Residuals	14	1495.61	106.829
2016-11-16	0-7.6 cm	EquivSeg_Nitrate_N_kg_per_ha	20	Treatment_Level	4	1547.64	386.911	0.935731	0.471616
2016-11-16	0-7.6 cm	EquivSeg_Nitrate_N_kg_per_ha	20	Block	1	608.88	608.88	1.47255	0.24502
2016-11-16	0-7.6 cm	EquivSeg_Nitrate_N_kg_per_ha	20	Residuals	14	5788.79	413.485
2016-11-16	7.6-15 cm	EquivSeg_Nitrate_N_kg_per_ha	20	Treatment_Level	4	280.635	70.1588	0.840129	0.522336
2016-11-16	7.6-15 cm	EquivSeg_Nitrate_N_kg_per_ha	20	Block	1	133.738	133.738	1.60147	0.226352
2016-11-16	7.6-15 cm	EquivSeg_Nitrate_N_kg_per_ha	20	Residuals	14	1169.13	83.5096
2016-11-16	15-30 cm	EquivSeg_Nitrate_N_kg_per_ha	20	Treatment_Level	4	65.2291	16.3073	2.01455	0.147575
2016-11-16	15-30 cm	EquivSeg_Nitrate_N_kg_per_ha	20	Block	1	21.2018	21.2018	2.61921	0.127878
2016-11-16	15-30 cm	EquivSeg_Nitrate_N_kg_per_ha	20	Residuals	14	113.326	8.09473
2016-11-16	30-61 cm	EquivSeg_Nitrate_N_kg_per_ha	20	Treatment_Level	4	413.13	103.283	1.54072	0.244286
2016-11-16	30-61 cm	EquivSeg_Nitrate_N_kg_per_ha	20	Block	1	50.5327	50.5327	0.753826	0.399907
2016-11-16	30-61 cm	EquivSeg_Nitrate_N_kg_per_ha	20	Residuals	14	938.491	67.035
2016-11-16	61-91 cm	EquivSeg_Nitrate_N_kg_per_ha	20	Treatment_Level	4	183.752	45.9379	1.63225	0.221321
2016-11-16	61-91 cm	EquivSeg_Nitrate_N_kg_per_ha	20	Block	1	26.9852	26.9852	0.958826	0.344102
2016-11-16	61-91 cm	EquivSeg_Nitrate_N_kg_per_ha	20	Residuals	14	394.016	28.144
2016-11-16	91-120 cm	EquivSeg_Nitrate_N_kg_per_ha	20	Treatment_Level	4	775.326	193.832	1.72291	0.200818
2016-11-16	91-120 cm	EquivSeg_Nitrate_N_kg_per_ha	20	Block	1	70.8839	70.8839	0.630066	0.440578
2016-11-16	91-120 cm	EquivSeg_Nitrate_N_kg_per_ha	20	Residuals	14	1575.03	112.502
2016-11-16	120-150 cm	EquivSeg_Nitrate_N_kg_per_ha	16	Treatment_Level	4	1465.92	366.48	4.25178	0.0288744
2016-11-16	120-150 cm	EquivSeg_Nitrate_N_kg_per_ha	16	Block	1	22.2806	22.2806	0.258492	0.622185
2016-11-16	120-150 cm	EquivSeg_Nitrate_N_kg_per_ha	16	Residuals	10	861.944	86.1944
2017-03-27	0-7.6 cm	EquivSeg_Nitrate_N_kg_per_ha	20	Treatment_Level	4	57.2278	14.307	1.61498	0.225473
2017-03-27	0-7.6 cm	EquivSeg_Nitrate_N_kg_per_ha	20	Block	1	2.25929	2.25929	0.25503	0.621412
2017-03-27	0-7.6 cm	EquivSeg_Nitrate_N_kg_per_ha	20	Residuals	14	124.025	8.85892
2017-03-27	7.6-15 cm	EquivSeg_Nitrate_N_kg_per_ha	20	Treatment_Level	4	42.5116	10.6279	4.05236	0.0218343
2017-03-27	7.6-15 cm	EquivSeg_Nitrate_N_kg_per_ha	20	Block	1	1.81924	1.81924	0.693666	0.418902
2017-03-27	7.6-15 cm	EquivSeg_Nitrate_N_kg_per_ha	20	Residuals	14	36.717	2.62265
2017-03-27	15-30 cm	EquivSeg_Nitrate_N_kg_per_ha	20	Treatment_Level	4	46.241	11.5603	3.97677	0.0232656
2017-03-27	15-30 cm	EquivSeg_Nitrate_N_kg_per_ha	20	Block	1	4.93155	4.93155	1.69647	0.21377
2017-03-27	15-30 cm	EquivSeg_Nitrate_N_kg_per_ha	20	Residuals	14	40.6973	2.90695
2017-03-27	30-61 cm	EquivSeg_Nitrate_N_kg_per_ha	20	Treatment_Level	4	148.382	37.0954	1.63081	0.221663
2017-03-27	30-61 cm	EquivSeg_Nitrate_N_kg_per_ha	20	Block	1	11.8668	11.8668	0.521698	0.48201
2017-03-27	30-61 cm	EquivSeg_Nitrate_N_kg_per_ha	20	Residuals	14	318.452	22.7465
2017-03-27	61-91 cm	EquivSeg_Nitrate_N_kg_per_ha	20	Treatment_Level	4	346.212	86.553	1.60563	0.227756
2017-03-27	61-91 cm	EquivSeg_Nitrate_N_kg_per_ha	20	Block	1	19.7456	19.7456	0.366297	0.554714
2017-03-27	61-91 cm	EquivSeg_Nitrate_N_kg_per_ha	20	Residuals	14	754.684	53.906
2017-03-27	91-120 cm	EquivSeg_Nitrate_N_kg_per_ha	17	Treatment_Level	4	909.41	227.353	7.91818	0.00293689
2017-03-27	91-120 cm	EquivSeg_Nitrate_N_kg_per_ha	17	Block	1	7.42332	7.42332	0.258538	0.621169
2017-03-27	91-120 cm	EquivSeg_Nitrate_N_kg_per_ha	17	Residuals	11	315.84	28.7127
2017-11-13	0-7.6 cm	EquivSeg_Nitrate_N_kg_per_ha	20	Treatment_Level	4	135.288	33.8221	0.747117	0.575957
2017-11-13	0-7.6 cm	EquivSeg_Nitrate_N_kg_per_ha	20	Block	1	21.698	21.698	0.4793	0.500062
2017-11-13	0-7.6 cm	EquivSeg_Nitrate_N_kg_per_ha	20	Residuals	14	633.782	45.2702
2017-11-13	7.6-15 cm	EquivSeg_Nitrate_N_kg_per_ha	20	Treatment_Level	4	141.361	35.3403	3.0062	0.0552041
2017-11-13	7.6-15 cm	EquivSeg_Nitrate_N_kg_per_ha	20	Block	1	24.8112	24.8112	2.11055	0.168331
2017-11-13	7.6-15 cm	EquivSeg_Nitrate_N_kg_per_ha	20	Residuals	14	164.581	11.7558
2017-11-13	15-30 cm	EquivSeg_Nitrate_N_kg_per_ha	20	Treatment_Level	4	101.977	25.4943	5.04385	0.00993634
2017-11-13	15-30 cm	EquivSeg_Nitrate_N_kg_per_ha	20	Block	1	23.283	23.283	4.60637	0.0498644
2017-11-13	15-30 cm	EquivSeg_Nitrate_N_kg_per_ha	20	Residuals	14	70.7635	5.05453
2017-11-13	30-61 cm	EquivSeg_Nitrate_N_kg_per_ha	20	Treatment_Level	4	84.9334	21.2333	6.26488	0.00417312
2017-11-13	30-61 cm	EquivSeg_Nitrate_N_kg_per_ha	20	Block	1	0.00269685	0.00269685	0.000795702	0.977894
2017-11-13	30-61 cm	EquivSeg_Nitrate_N_kg_per_ha	20	Residuals	14	47.4497	3.38927
2017-11-13	61-91 cm	EquivSeg_Nitrate_N_kg_per_ha	20	Treatment_Level	4	86.8883	21.7221	3.05936	0.0525235
2017-11-13	61-91 cm	EquivSeg_Nitrate_N_kg_per_ha	20	Block	1	0.373255	0.373255	0.0525696	0.821967
2017-11-13	61-91 cm	EquivSeg_Nitrate_N_kg_per_ha	20	Residuals	14	99.403	7.10021
2017-11-13	91-120 cm	EquivSeg_Nitrate_N_kg_per_ha	20	Treatment_Level	4	136.347	34.0867	2.91035	0.0604336
2017-11-13	91-120 cm	EquivSeg_Nitrate_N_kg_per_ha	20	Block	1	10.7329	10.7329	0.916384	0.354666
2017-11-13	91-120 cm	EquivSeg_Nitrate_N_kg_per_ha	20	Residuals	14	163.971	11.7122
2017-11-13	120-150 cm	EquivSeg_Nitrate_N_kg_per_ha	11	Treatment_Level	3	1053.49	351.163	2.92223	0.122168
2017-11-13	120-150 cm	EquivSeg_Nitrate_N_kg_per_ha	11	Block	1	38.6635	38.6635	0.321741	0.591137
2017-11-13	120-150 cm	EquivSeg_Nitrate_N_kg_per_ha	11	Residuals	6	721.018	120.17
2012-02-01	0-7.6 cm	EquivSeg_Organic_C_kg_per_ha	20	Treatment_Level	4	2.44352e+06	610881	0.43874	0.778629
2012-02-01	0-7.6 cm	EquivSeg_Organic_C_kg_per_ha	20	Block	1	1.64355e+06	1.64355e+06	1.18041	0.295625
2012-02-01	0-7.6 cm	EquivSeg_Organic_C_kg_per_ha	20	Residuals	14	1.94929e+07	1.39235e+06
2012-02-01	7.6-15 cm	EquivSeg_Organic_C_kg_per_ha	19	Treatment_Level	4	1.16302e+06	290755	0.801191	0.545673
2012-02-01	7.6-15 cm	EquivSeg_Organic_C_kg_per_ha	19	Block	1	681616	681616	1.87823	0.193736
2012-02-01	7.6-15 cm	EquivSeg_Organic_C_kg_per_ha	19	Residuals	13	4.71774e+06	362903
2012-02-01	15-30 cm	EquivSeg_Organic_C_kg_per_ha	20	Treatment_Level	4	2.53195e+07	6.32987e+06	1.25132	0.334685
2012-02-01	15-30 cm	EquivSeg_Organic_C_kg_per_ha	20	Block	1	1.20474e+06	1.20474e+06	0.238159	0.633093
2012-02-01	15-30 cm	EquivSeg_Organic_C_kg_per_ha	20	Residuals	14	7.08198e+07	5.05856e+06
2012-02-01	30-61 cm	EquivSeg_Organic_C_kg_per_ha	19	Treatment_Level	4	2.1535e+07	5.38376e+06	0.377903	0.820414
2012-02-01	30-61 cm	EquivSeg_Organic_C_kg_per_ha	19	Block	1	1.40894e+07	1.40894e+07	0.988978	0.338143
2012-02-01	30-61 cm	EquivSeg_Organic_C_kg_per_ha	19	Residuals	13	1.85203e+08	1.42464e+07
2012-02-01	61-91 cm	EquivSeg_Organic_C_kg_per_ha	19	Treatment_Level	4	8.4945e+06	2.12363e+06	1.18818	0.361564
2012-02-01	61-91 cm	EquivSeg_Organic_C_kg_per_ha	19	Block	1	8.17964e+06	8.17964e+06	4.57657	0.0519619
2012-02-01	61-91 cm	EquivSeg_Organic_C_kg_per_ha	19	Residuals	13	2.32347e+07	1.78729e+06
2012-02-01	91-120 cm	EquivSeg_Organic_C_kg_per_ha	20	Treatment_Level	4	8.94452e+06	2.23613e+06	2.03735	0.144112
2012-02-01	91-120 cm	EquivSeg_Organic_C_kg_per_ha	20	Block	1	2.31315e+06	2.31315e+06	2.10752	0.168616
2012-02-01	91-120 cm	EquivSeg_Organic_C_kg_per_ha	20	Residuals	14	1.5366e+07	1.09757e+06
2012-11-16	0-7.6 cm	EquivSeg_Organic_C_kg_per_ha	20	Treatment_Level	4	3.45525e+07	8.63811e+06	4.01471	0.0225343
2012-11-16	0-7.6 cm	EquivSeg_Organic_C_kg_per_ha	20	Block	1	3.44551e+06	3.44551e+06	1.60136	0.226367
2012-11-16	0-7.6 cm	EquivSeg_Organic_C_kg_per_ha	20	Residuals	14	3.01226e+07	2.15162e+06
2012-11-16	7.6-15 cm	EquivSeg_Organic_C_kg_per_ha	20	Treatment_Level	4	1.97964e+07	4.94909e+06	3.5659	0.0331632
2012-11-16	7.6-15 cm	EquivSeg_Organic_C_kg_per_ha	20	Block	1	50591	50591	0.0364516	0.851327
2012-11-16	7.6-15 cm	EquivSeg_Organic_C_kg_per_ha	20	Residuals	14	1.94305e+07	1.3879e+06
2012-11-16	15-30 cm	EquivSeg_Organic_C_kg_per_ha	20	Treatment_Level	4	3.14278e+06	785696	0.160655	0.954794
2012-11-16	15-30 cm	EquivSeg_Organic_C_kg_per_ha	20	Block	1	833933	833933	0.170518	0.685906
2012-11-16	15-30 cm	EquivSeg_Organic_C_kg_per_ha	20	Residuals	14	6.84681e+07	4.89058e+06
2012-11-16	30-61 cm	EquivSeg_Organic_C_kg_per_ha	20	Treatment_Level	4	2.3258e+07	5.8145e+06	0.187115	0.941207
2012-11-16	30-61 cm	EquivSeg_Organic_C_kg_per_ha	20	Block	1	322482	322482	0.0103777	0.920304
2012-11-16	30-61 cm	EquivSeg_Organic_C_kg_per_ha	20	Residuals	14	4.35043e+08	3.10745e+07
2012-11-16	61-91 cm	EquivSeg_Organic_C_kg_per_ha	20	Treatment_Level	4	3.66432e+06	916080	0.17718	0.946447
2012-11-16	61-91 cm	EquivSeg_Organic_C_kg_per_ha	20	Block	1	1.89678e+06	1.89678e+06	0.366857	0.554415
2012-11-16	61-91 cm	EquivSeg_Organic_C_kg_per_ha	20	Residuals	14	7.23848e+07	5.17034e+06
2012-11-16	91-120 cm	EquivSeg_Organic_C_kg_per_ha	20	Treatment_Level	4	4.88135e+06	1.22034e+06	0.358414	0.833992
2012-11-16	91-120 cm	EquivSeg_Organic_C_kg_per_ha	20	Block	1	2.33943e+06	2.33943e+06	0.687093	0.421063
2012-11-16	91-120 cm	EquivSeg_Organic_C_kg_per_ha	20	Residuals	14	4.76675e+07	3.40482e+06
2013-11-08	0-7.6 cm	EquivSeg_Organic_C_kg_per_ha	20	Treatment_Level	4	4.31302e+07	1.07826e+07	6.4808	0.00361612
2013-11-08	0-7.6 cm	EquivSeg_Organic_C_kg_per_ha	20	Block	1	1.69988e+06	1.69988e+06	1.0217	0.329267
2013-11-08	0-7.6 cm	EquivSeg_Organic_C_kg_per_ha	20	Residuals	14	2.32928e+07	1.66377e+06
2013-11-08	7.6-15 cm	EquivSeg_Organic_C_kg_per_ha	20	Treatment_Level	4	2.46161e+07	6.15404e+06	6.96129	0.00265489
2013-11-08	7.6-15 cm	EquivSeg_Organic_C_kg_per_ha	20	Block	1	1.03399e+06	1.03399e+06	1.16962	0.297757
2013-11-08	7.6-15 cm	EquivSeg_Organic_C_kg_per_ha	20	Residuals	14	1.23765e+07	884037
2013-11-08	15-30 cm	EquivSeg_Organic_C_kg_per_ha	20	Treatment_Level	4	3.11589e+06	778973	0.319988	0.859896
2013-11-08	15-30 cm	EquivSeg_Organic_C_kg_per_ha	20	Block	1	777801	777801	0.319507	0.58085
2013-11-08	15-30 cm	EquivSeg_Organic_C_kg_per_ha	20	Residuals	14	3.40813e+07	2.43438e+06
2013-11-08	30-61 cm	EquivSeg_Organic_C_kg_per_ha	20	Treatment_Level	4	2.4386e+07	6.0965e+06	0.187489	0.941007
2013-11-08	30-61 cm	EquivSeg_Organic_C_kg_per_ha	20	Block	1	202621	202621	0.00623132	0.938199
2013-11-08	30-61 cm	EquivSeg_Organic_C_kg_per_ha	20	Residuals	14	4.55232e+08	3.25166e+07
2013-11-08	61-91 cm	EquivSeg_Organic_C_kg_per_ha	20	Treatment_Level	4	2.33289e+07	5.83224e+06	0.585142	0.67863
2013-11-08	61-91 cm	EquivSeg_Organic_C_kg_per_ha	20	Block	1	57995.3	57995.3	0.0058186	0.940276
2013-11-08	61-91 cm	EquivSeg_Organic_C_kg_per_ha	20	Residuals	14	1.39541e+08	9.96722e+06
2013-11-08	91-120 cm	EquivSeg_Organic_C_kg_per_ha	20	Treatment_Level	4	6.44116e+06	1.61029e+06	0.526247	0.718334
2013-11-08	91-120 cm	EquivSeg_Organic_C_kg_per_ha	20	Block	1	4.81268e+06	4.81268e+06	1.57279	0.230338
2013-11-08	91-120 cm	EquivSeg_Organic_C_kg_per_ha	20	Residuals	14	4.28394e+07	3.05996e+06
2015-11-24	0-7.6 cm	EquivSeg_Organic_C_kg_per_ha	17	Treatment_Level	4	1.60257e+08	4.00643e+07	7.54804	0.00353067
2015-11-24	0-7.6 cm	EquivSeg_Organic_C_kg_per_ha	17	Block	1	1.61238e+07	1.61238e+07	3.03769	0.109198
2015-11-24	0-7.6 cm	EquivSeg_Organic_C_kg_per_ha	17	Residuals	11	5.8387e+07	5.30791e+06
2015-11-24	7.6-15 cm	EquivSeg_Organic_C_kg_per_ha	20	Treatment_Level	4	9.84338e+07	2.46085e+07	5.90002	0.00535124
2015-11-24	7.6-15 cm	EquivSeg_Organic_C_kg_per_ha	20	Block	1	3.63886e+07	3.63886e+07	8.72438	0.0104688
2015-11-24	7.6-15 cm	EquivSeg_Organic_C_kg_per_ha	20	Residuals	14	5.83927e+07	4.17091e+06
2015-11-24	15-30 cm	EquivSeg_Organic_C_kg_per_ha	18	Treatment_Level	4	1.56503e+08	3.91258e+07	3.27114	0.0494957
2015-11-24	15-30 cm	EquivSeg_Organic_C_kg_per_ha	18	Block	1	7.25841e+07	7.25841e+07	6.06844	0.0298509
2015-11-24	15-30 cm	EquivSeg_Organic_C_kg_per_ha	18	Residuals	12	1.43531e+08	1.19609e+07
2015-11-24	30-61 cm	EquivSeg_Organic_C_kg_per_ha	20	Treatment_Level	4	5.79188e+07	1.44797e+07	0.384482	0.816138
2015-11-24	30-61 cm	EquivSeg_Organic_C_kg_per_ha	20	Block	1	5.92616e+07	5.92616e+07	1.57359	0.230227
2015-11-24	30-61 cm	EquivSeg_Organic_C_kg_per_ha	20	Residuals	14	5.27243e+08	3.76602e+07
2015-11-24	61-91 cm	EquivSeg_Organic_C_kg_per_ha	19	Treatment_Level	4	6.77471e+06	1.69368e+06	0.220878	0.92199
2015-11-24	61-91 cm	EquivSeg_Organic_C_kg_per_ha	19	Block	1	1.1697e+07	1.1697e+07	1.52544	0.238655
2015-11-24	61-91 cm	EquivSeg_Organic_C_kg_per_ha	19	Residuals	13	9.96832e+07	7.66793e+06
2015-11-24	91-120 cm	EquivSeg_Organic_C_kg_per_ha	19	Treatment_Level	4	2.16232e+06	540580	0.3144	0.86328
2015-11-24	91-120 cm	EquivSeg_Organic_C_kg_per_ha	19	Block	1	1.50443e+07	1.50443e+07	8.74974	0.0111
2015-11-24	91-120 cm	EquivSeg_Organic_C_kg_per_ha	19	Residuals	13	2.23522e+07	1.7194e+06
2016-11-16	0-7.6 cm	EquivSeg_Organic_C_kg_per_ha	19	Treatment_Level	4	8.54264e+07	2.13566e+07	3.14945	0.0513397
2016-11-16	0-7.6 cm	EquivSeg_Organic_C_kg_per_ha	19	Block	1	2.76313e+06	2.76313e+06	0.407477	0.534337
2016-11-16	0-7.6 cm	EquivSeg_Organic_C_kg_per_ha	19	Residuals	13	8.81537e+07	6.78105e+06
2016-11-16	7.6-15 cm	EquivSeg_Organic_C_kg_per_ha	19	Treatment_Level	4	1.04943e+08	2.62358e+07	7.4803	0.00235012
2016-11-16	7.6-15 cm	EquivSeg_Organic_C_kg_per_ha	19	Block	1	85.72	85.72	2.44403e-05	0.996131
2016-11-16	7.6-15 cm	EquivSeg_Organic_C_kg_per_ha	19	Residuals	13	4.55952e+07	3.50732e+06
2016-11-16	15-30 cm	EquivSeg_Organic_C_kg_per_ha	19	Treatment_Level	4	3.17022e+07	7.92556e+06	1.42139	0.281666
2016-11-16	15-30 cm	EquivSeg_Organic_C_kg_per_ha	19	Block	1	1.26245e+06	1.26245e+06	0.226412	0.642093
2016-11-16	15-30 cm	EquivSeg_Organic_C_kg_per_ha	19	Residuals	13	7.24868e+07	5.5759e+06
2016-11-16	30-61 cm	EquivSeg_Organic_C_kg_per_ha	20	Treatment_Level	4	2.58362e+07	6.45905e+06	0.293772	0.877153
2016-11-16	30-61 cm	EquivSeg_Organic_C_kg_per_ha	20	Block	1	4.71469e+06	4.71469e+06	0.214434	0.65043
2016-11-16	30-61 cm	EquivSeg_Organic_C_kg_per_ha	20	Residuals	14	3.07813e+08	2.19866e+07
2016-11-16	61-91 cm	EquivSeg_Organic_C_kg_per_ha	20	Treatment_Level	4	6.35886e+07	1.58971e+07	1.40583	0.282794
2016-11-16	61-91 cm	EquivSeg_Organic_C_kg_per_ha	20	Block	1	508.495	508.495	4.49677e-05	0.994744
2016-11-16	61-91 cm	EquivSeg_Organic_C_kg_per_ha	20	Residuals	14	1.58312e+08	1.1308e+07
2016-11-16	91-120 cm	EquivSeg_Organic_C_kg_per_ha	20	Treatment_Level	4	1.50894e+07	3.77235e+06	1.34698	0.301516
2016-11-16	91-120 cm	EquivSeg_Organic_C_kg_per_ha	20	Block	1	2.04966e+06	2.04966e+06	0.731865	0.406683
2016-11-16	91-120 cm	EquivSeg_Organic_C_kg_per_ha	20	Residuals	14	3.92084e+07	2.8006e+06
2017-11-13	0-7.6 cm	EquivSeg_Organic_C_kg_per_ha	19	Treatment_Level	4	1.01525e+08	2.53812e+07	28.9759	2.28692e-06
2017-11-13	0-7.6 cm	EquivSeg_Organic_C_kg_per_ha	19	Block	1	794422	794422	0.906933	0.358302
2017-11-13	0-7.6 cm	EquivSeg_Organic_C_kg_per_ha	19	Residuals	13	1.13873e+07	875943
2017-11-13	7.6-15 cm	EquivSeg_Organic_C_kg_per_ha	20	Treatment_Level	4	1.27946e+08	3.19865e+07	21.4714	7.45844e-06
2017-11-13	7.6-15 cm	EquivSeg_Organic_C_kg_per_ha	20	Block	1	705335	705335	0.473465	0.50264
2017-11-13	7.6-15 cm	EquivSeg_Organic_C_kg_per_ha	20	Residuals	14	2.08562e+07	1.48973e+06
2017-11-13	15-30 cm	EquivSeg_Organic_C_kg_per_ha	19	Treatment_Level	4	2.11125e+07	5.27812e+06	1.16485	0.37073
2017-11-13	15-30 cm	EquivSeg_Organic_C_kg_per_ha	19	Block	1	6.4178e+06	6.4178e+06	1.41638	0.255281
2017-11-13	15-30 cm	EquivSeg_Organic_C_kg_per_ha	19	Residuals	13	5.89048e+07	4.53114e+06
2017-11-13	30-61 cm	EquivSeg_Organic_C_kg_per_ha	20	Treatment_Level	4	5.73077e+07	1.43269e+07	0.463707	0.76134
2017-11-13	30-61 cm	EquivSeg_Organic_C_kg_per_ha	20	Block	1	5.69534e+07	5.69534e+07	1.84336	0.19604
2017-11-13	30-61 cm	EquivSeg_Organic_C_kg_per_ha	20	Residuals	14	4.32551e+08	3.08965e+07
2017-11-13	61-91 cm	EquivSeg_Organic_C_kg_per_ha	20	Treatment_Level	4	1.93172e+07	4.8293e+06	0.580382	0.6818
2017-11-13	61-91 cm	EquivSeg_Organic_C_kg_per_ha	20	Block	1	1.69774e+07	1.69774e+07	2.04033	0.175105
2017-11-13	61-91 cm	EquivSeg_Organic_C_kg_per_ha	20	Residuals	14	1.16493e+08	8.32089e+06
2017-11-13	91-120 cm	EquivSeg_Organic_C_kg_per_ha	20	Treatment_Level	4	1.32093e+07	3.30232e+06	0.344013	0.843769
2017-11-13	91-120 cm	EquivSeg_Organic_C_kg_per_ha	20	Block	1	56104	56104	0.00584452	0.940143
2017-11-13	91-120 cm	EquivSeg_Organic_C_kg_per_ha	20	Residuals	14	1.34392e+08	9.59941e+06
2012-02-01	0-7.6 cm	EquivSeg_Organic_N_kg_per_ha	20	Treatment_Level	4	29151.6	7287.9	1.68369	0.209427
2012-02-01	0-7.6 cm	EquivSeg_Organic_N_kg_per_ha	20	Block	1	284.053	284.053	0.0656236	0.801545
2012-02-01	0-7.6 cm	EquivSeg_Organic_N_kg_per_ha	20	Residuals	14	60599.2	4328.52
2012-02-01	7.6-15 cm	EquivSeg_Organic_N_kg_per_ha	20	Treatment_Level	4	25154.9	6288.73	1.02323	0.429089
2012-02-01	7.6-15 cm	EquivSeg_Organic_N_kg_per_ha	20	Block	1	5527.29	5527.29	0.899335	0.359043
2012-02-01	7.6-15 cm	EquivSeg_Organic_N_kg_per_ha	20	Residuals	14	86043.5	6145.97
2012-02-01	15-30 cm	EquivSeg_Organic_N_kg_per_ha	20	Treatment_Level	4	162421	40605.3	0.531343	0.714861
2012-02-01	15-30 cm	EquivSeg_Organic_N_kg_per_ha	20	Block	1	80026.8	80026.8	1.0472	0.323512
2012-02-01	15-30 cm	EquivSeg_Organic_N_kg_per_ha	20	Residuals	14	1.06988e+06	76420.1
2012-02-01	30-61 cm	EquivSeg_Organic_N_kg_per_ha	20	Treatment_Level	4	352504	88125.9	0.292312	0.878102
2012-02-01	30-61 cm	EquivSeg_Organic_N_kg_per_ha	20	Block	1	417444	417444	1.38465	0.25893
2012-02-01	30-61 cm	EquivSeg_Organic_N_kg_per_ha	20	Residuals	14	4.2207e+06	301479
2012-02-01	61-91 cm	EquivSeg_Organic_N_kg_per_ha	20	Treatment_Level	4	221071	55267.7	0.398825	0.806253
2012-02-01	61-91 cm	EquivSeg_Organic_N_kg_per_ha	20	Block	1	591023	591023	4.26496	0.0579394
2012-02-01	61-91 cm	EquivSeg_Organic_N_kg_per_ha	20	Residuals	14	1.94007e+06	138576
2012-02-01	91-120 cm	EquivSeg_Organic_N_kg_per_ha	20	Treatment_Level	4	167146	41786.5	0.406368	0.801043
2012-02-01	91-120 cm	EquivSeg_Organic_N_kg_per_ha	20	Block	1	797060	797060	7.7513	0.0146305
2012-02-01	91-120 cm	EquivSeg_Organic_N_kg_per_ha	20	Residuals	14	1.43961e+06	102829
2012-11-16	0-7.6 cm	EquivSeg_Organic_N_kg_per_ha	20	Treatment_Level	4	446704	111676	8.07644	0.00135862
2012-11-16	0-7.6 cm	EquivSeg_Organic_N_kg_per_ha	20	Block	1	76833.1	76833.1	5.5566	0.0334975
2012-11-16	0-7.6 cm	EquivSeg_Organic_N_kg_per_ha	20	Residuals	14	193583	13827.4
2012-11-16	7.6-15 cm	EquivSeg_Organic_N_kg_per_ha	20	Treatment_Level	4	236905	59226.3	4.28552	0.0180089
2012-11-16	7.6-15 cm	EquivSeg_Organic_N_kg_per_ha	20	Block	1	50366.8	50366.8	3.64446	0.0769685
2012-11-16	7.6-15 cm	EquivSeg_Organic_N_kg_per_ha	20	Residuals	14	193481	13820.1
2012-11-16	15-30 cm	EquivSeg_Organic_N_kg_per_ha	20	Treatment_Level	4	110790	27697.5	0.348369	0.84082
2012-11-16	15-30 cm	EquivSeg_Organic_N_kg_per_ha	20	Block	1	185602	185602	2.33444	0.148815
2012-11-16	15-30 cm	EquivSeg_Organic_N_kg_per_ha	20	Residuals	14	1.11309e+06	79506.2
2012-11-16	30-61 cm	EquivSeg_Organic_N_kg_per_ha	20	Treatment_Level	4	651489	162872	0.388596	0.813306
2012-11-16	30-61 cm	EquivSeg_Organic_N_kg_per_ha	20	Block	1	907821	907821	2.16597	0.163216
2012-11-16	30-61 cm	EquivSeg_Organic_N_kg_per_ha	20	Residuals	14	5.86782e+06	419130
2012-11-16	61-91 cm	EquivSeg_Organic_N_kg_per_ha	20	Treatment_Level	4	80741.2	20185.3	0.165809	0.952242
2012-11-16	61-91 cm	EquivSeg_Organic_N_kg_per_ha	20	Block	1	875597	875597	7.19245	0.0178798
2012-11-16	61-91 cm	EquivSeg_Organic_N_kg_per_ha	20	Residuals	14	1.70434e+06	121738
2012-11-16	91-120 cm	EquivSeg_Organic_N_kg_per_ha	20	Treatment_Level	4	259788	64947.1	0.554963	0.698853
2012-11-16	91-120 cm	EquivSeg_Organic_N_kg_per_ha	20	Block	1	805542	805542	6.88324	0.0200352
2012-11-16	91-120 cm	EquivSeg_Organic_N_kg_per_ha	20	Residuals	14	1.63841e+06	117030
2013-11-08	0-7.6 cm	EquivSeg_Organic_N_kg_per_ha	19	Treatment_Level	4	475556	118889	11.7169	0.000297437
2013-11-08	0-7.6 cm	EquivSeg_Organic_N_kg_per_ha	19	Block	1	83601.4	83601.4	8.2392	0.013133
2013-11-08	0-7.6 cm	EquivSeg_Organic_N_kg_per_ha	19	Residuals	13	131908	10146.8
2013-11-08	7.6-15 cm	EquivSeg_Organic_N_kg_per_ha	20	Treatment_Level	4	253612	63403	6.45815	0.00367038
2013-11-08	7.6-15 cm	EquivSeg_Organic_N_kg_per_ha	20	Block	1	91196.2	91196.2	9.28914	0.00868748
2013-11-08	7.6-15 cm	EquivSeg_Organic_N_kg_per_ha	20	Residuals	14	137445	9817.51
2013-11-08	15-30 cm	EquivSeg_Organic_N_kg_per_ha	20	Treatment_Level	4	50801.7	12700.4	0.336345	0.848944
2013-11-08	15-30 cm	EquivSeg_Organic_N_kg_per_ha	20	Block	1	206555	206555	5.47017	0.0346933
2013-11-08	15-30 cm	EquivSeg_Organic_N_kg_per_ha	20	Residuals	14	528643	37760.2
2013-11-08	30-61 cm	EquivSeg_Organic_N_kg_per_ha	20	Treatment_Level	4	352338	88084.5	0.300847	0.872537
2013-11-08	30-61 cm	EquivSeg_Organic_N_kg_per_ha	20	Block	1	343339	343339	1.17265	0.297156
2013-11-08	30-61 cm	EquivSeg_Organic_N_kg_per_ha	20	Residuals	14	4.09904e+06	292789
2013-11-08	61-91 cm	EquivSeg_Organic_N_kg_per_ha	19	Treatment_Level	4	86081.4	21520.4	0.56443	0.692801
2013-11-08	61-91 cm	EquivSeg_Organic_N_kg_per_ha	19	Block	1	866918	866918	22.7373	0.000367108
2013-11-08	61-91 cm	EquivSeg_Organic_N_kg_per_ha	19	Residuals	13	495659	38127.6
2013-11-08	91-120 cm	EquivSeg_Organic_N_kg_per_ha	19	Treatment_Level	4	89021.6	22255.4	0.562254	0.694254
2013-11-08	91-120 cm	EquivSeg_Organic_N_kg_per_ha	19	Block	1	961648	961648	24.2948	0.000275529
2013-11-08	91-120 cm	EquivSeg_Organic_N_kg_per_ha	19	Residuals	13	514572	39582.5
2015-11-24	0-7.6 cm	EquivSeg_Organic_N_kg_per_ha	17	Treatment_Level	4	1.21278e+06	303194	6.55631	0.00597045
2015-11-24	0-7.6 cm	EquivSeg_Organic_N_kg_per_ha	17	Block	1	158726	158726	3.43231	0.0909318
2015-11-24	0-7.6 cm	EquivSeg_Organic_N_kg_per_ha	17	Residuals	11	508691	46244.7
2015-11-24	7.6-15 cm	EquivSeg_Organic_N_kg_per_ha	20	Treatment_Level	4	882044	220511	7.45964	0.00195284
2015-11-24	7.6-15 cm	EquivSeg_Organic_N_kg_per_ha	20	Block	1	264073	264073	8.93329	0.00976471
2015-11-24	7.6-15 cm	EquivSeg_Organic_N_kg_per_ha	20	Residuals	14	413848	29560.5
2015-11-24	15-30 cm	EquivSeg_Organic_N_kg_per_ha	20	Treatment_Level	4	1.89737e+06	474342	4.15322	0.0200767
2015-11-24	15-30 cm	EquivSeg_Organic_N_kg_per_ha	20	Block	1	536008	536008	4.69315	0.0480286
2015-11-24	15-30 cm	EquivSeg_Organic_N_kg_per_ha	20	Residuals	14	1.59895e+06	114211
2015-11-24	30-61 cm	EquivSeg_Organic_N_kg_per_ha	19	Treatment_Level	4	275363	68840.7	0.183656	0.942768
2015-11-24	30-61 cm	EquivSeg_Organic_N_kg_per_ha	19	Block	1	1.23672e+06	1.23672e+06	3.29938	0.0924263
2015-11-24	30-61 cm	EquivSeg_Organic_N_kg_per_ha	19	Residuals	13	4.87286e+06	374835
2015-11-24	61-91 cm	EquivSeg_Organic_N_kg_per_ha	19	Treatment_Level	4	174849	43712.2	0.908338	0.487586
2015-11-24	61-91 cm	EquivSeg_Organic_N_kg_per_ha	19	Block	1	62018.1	62018.1	1.28873	0.276779
2015-11-24	61-91 cm	EquivSeg_Organic_N_kg_per_ha	19	Residuals	13	625603	48123.3
2015-11-24	91-120 cm	EquivSeg_Organic_N_kg_per_ha	20	Treatment_Level	4	253185	63296.3	1.09829	0.39548
2015-11-24	91-120 cm	EquivSeg_Organic_N_kg_per_ha	20	Block	1	7833.77	7833.77	0.135929	0.717878
2015-11-24	91-120 cm	EquivSeg_Organic_N_kg_per_ha	20	Residuals	14	806840	57631.4
2016-11-16	0-7.6 cm	EquivSeg_Organic_N_kg_per_ha	19	Treatment_Level	4	865664	216416	5.01994	0.0114207
2016-11-16	0-7.6 cm	EquivSeg_Organic_N_kg_per_ha	19	Block	1	40449	40449	0.938246	0.350406
2016-11-16	0-7.6 cm	EquivSeg_Organic_N_kg_per_ha	19	Residuals	13	560447	43111.3
2016-11-16	7.6-15 cm	EquivSeg_Organic_N_kg_per_ha	20	Treatment_Level	4	868669	217167	7.84809	0.00155063
2016-11-16	7.6-15 cm	EquivSeg_Organic_N_kg_per_ha	20	Block	1	315.213	315.213	0.0113913	0.916517
2016-11-16	7.6-15 cm	EquivSeg_Organic_N_kg_per_ha	20	Residuals	14	387399	27671.4
2016-11-16	15-30 cm	EquivSeg_Organic_N_kg_per_ha	20	Treatment_Level	4	1.24413e+06	311032	1.739	0.197395
2016-11-16	15-30 cm	EquivSeg_Organic_N_kg_per_ha	20	Block	1	12704.3	12704.3	0.0710307	0.793727
2016-11-16	15-30 cm	EquivSeg_Organic_N_kg_per_ha	20	Residuals	14	2.50399e+06	178857
2016-11-16	30-61 cm	EquivSeg_Organic_N_kg_per_ha	20	Treatment_Level	4	267695	66923.8	0.287345	0.881318
2016-11-16	30-61 cm	EquivSeg_Organic_N_kg_per_ha	20	Block	1	288670	288670	1.23944	0.28433
2016-11-16	30-61 cm	EquivSeg_Organic_N_kg_per_ha	20	Residuals	14	3.26065e+06	232904
2016-11-16	61-91 cm	EquivSeg_Organic_N_kg_per_ha	20	Treatment_Level	4	236186	59046.6	0.658995	0.630472
2016-11-16	61-91 cm	EquivSeg_Organic_N_kg_per_ha	20	Block	1	3902.79	3902.79	0.0435575	0.837685
2016-11-16	61-91 cm	EquivSeg_Organic_N_kg_per_ha	20	Residuals	14	1.25441e+06	89601
2016-11-16	91-120 cm	EquivSeg_Organic_N_kg_per_ha	20	Treatment_Level	4	151789	37947.3	2.15552	0.127524
2016-11-16	91-120 cm	EquivSeg_Organic_N_kg_per_ha	20	Block	1	263849	263849	14.9874	0.00169468
2016-11-16	91-120 cm	EquivSeg_Organic_N_kg_per_ha	20	Residuals	14	246466	17604.7
2017-11-13	0-7.6 cm	EquivSeg_Organic_N_kg_per_ha	20	Treatment_Level	4	1.04921e+06	262302	29.7965	1.03008e-06
2017-11-13	0-7.6 cm	EquivSeg_Organic_N_kg_per_ha	20	Block	1	26050.8	26050.8	2.95928	0.107403
2017-11-13	0-7.6 cm	EquivSeg_Organic_N_kg_per_ha	20	Residuals	14	123244	8803.12
2017-11-13	7.6-15 cm	EquivSeg_Organic_N_kg_per_ha	20	Treatment_Level	4	1.06824e+06	267061	19.9614	1.14378e-05
2017-11-13	7.6-15 cm	EquivSeg_Organic_N_kg_per_ha	20	Block	1	29147.3	29147.3	2.1786	0.162077
2017-11-13	7.6-15 cm	EquivSeg_Organic_N_kg_per_ha	20	Residuals	14	187304	13378.9
2017-11-13	15-30 cm	EquivSeg_Organic_N_kg_per_ha	20	Treatment_Level	4	258435	64608.7	1.65017	0.217097
2017-11-13	15-30 cm	EquivSeg_Organic_N_kg_per_ha	20	Block	1	139515	139515	3.56337	0.0799725
2017-11-13	15-30 cm	EquivSeg_Organic_N_kg_per_ha	20	Residuals	14	548137	39152.7
2017-11-13	30-61 cm	EquivSeg_Organic_N_kg_per_ha	20	Treatment_Level	4	461430	115357	0.33212	0.851785
2017-11-13	30-61 cm	EquivSeg_Organic_N_kg_per_ha	20	Block	1	419185	419185	1.20686	0.29049
2017-11-13	30-61 cm	EquivSeg_Organic_N_kg_per_ha	20	Residuals	14	4.86271e+06	347337
2017-11-13	61-91 cm	EquivSeg_Organic_N_kg_per_ha	20	Treatment_Level	4	49704	12426	0.229394	0.917312
2017-11-13	61-91 cm	EquivSeg_Organic_N_kg_per_ha	20	Block	1	199527	199527	3.68343	0.075573
2017-11-13	61-91 cm	EquivSeg_Organic_N_kg_per_ha	20	Residuals	14	758364	54168.8
2017-11-13	91-120 cm	EquivSeg_Organic_N_kg_per_ha	19	Treatment_Level	4	36987	9246.75	0.176755	0.946396
2017-11-13	91-120 cm	EquivSeg_Organic_N_kg_per_ha	19	Block	1	204756	204756	3.91399	0.0694746
2017-11-13	91-120 cm	EquivSeg_Organic_N_kg_per_ha	19	Residuals	13	680081	52313.9
2012-02-01	0-7.6 cm	EquivSeg_Total_C_kg_per_ha	20	Treatment_Level	4	2.5229e+06	630726	0.172306	0.948958
2012-02-01	0-7.6 cm	EquivSeg_Total_C_kg_per_ha	20	Block	1	3.4426e+06	3.4426e+06	0.940473	0.348613
2012-02-01	0-7.6 cm	EquivSeg_Total_C_kg_per_ha	20	Residuals	14	5.1247e+07	3.6605e+06
2012-02-01	7.6-15 cm	EquivSeg_Total_C_kg_per_ha	20	Treatment_Level	4	1.02977e+06	257444	0.0587373	0.992861
2012-02-01	7.6-15 cm	EquivSeg_Total_C_kg_per_ha	20	Block	1	1.94822e+06	1.94822e+06	0.444498	0.515797
2012-02-01	7.6-15 cm	EquivSeg_Total_C_kg_per_ha	20	Residuals	14	6.13616e+07	4.38297e+06
2012-02-01	15-30 cm	EquivSeg_Total_C_kg_per_ha	20	Treatment_Level	4	4.32872e+07	1.08218e+07	1.04514	0.419009
2012-02-01	15-30 cm	EquivSeg_Total_C_kg_per_ha	20	Block	1	966415	966415	0.0933336	0.764476
2012-02-01	15-30 cm	EquivSeg_Total_C_kg_per_ha	20	Residuals	14	1.44962e+08	1.03544e+07
2012-02-01	30-61 cm	EquivSeg_Total_C_kg_per_ha	20	Treatment_Level	4	1.06183e+08	2.65458e+07	0.128613	0.969492
2012-02-01	30-61 cm	EquivSeg_Total_C_kg_per_ha	20	Block	1	4.5296e+08	4.5296e+08	2.19457	0.160652
2012-02-01	30-61 cm	EquivSeg_Total_C_kg_per_ha	20	Residuals	14	2.8896e+09	2.064e+08
2012-02-01	61-91 cm	EquivSeg_Total_C_kg_per_ha	20	Treatment_Level	4	1.31115e+08	3.27788e+07	0.517757	0.724131
2012-02-01	61-91 cm	EquivSeg_Total_C_kg_per_ha	20	Block	1	4.2784e+07	4.2784e+07	0.675795	0.424818
2012-02-01	61-91 cm	EquivSeg_Total_C_kg_per_ha	20	Residuals	14	8.86328e+08	6.33092e+07
2012-02-01	91-120 cm	EquivSeg_Total_C_kg_per_ha	20	Treatment_Level	4	2.23263e+07	5.58158e+06	0.185836	0.94189
2012-02-01	91-120 cm	EquivSeg_Total_C_kg_per_ha	20	Block	1	2.89588e+06	2.89588e+06	0.0964172	0.760747
2012-02-01	91-120 cm	EquivSeg_Total_C_kg_per_ha	20	Residuals	14	4.20489e+08	3.00349e+07
2012-11-16	0-7.6 cm	EquivSeg_Total_C_kg_per_ha	20	Treatment_Level	4	3.45639e+07	8.64098e+06	1.41033	0.281414
2012-11-16	0-7.6 cm	EquivSeg_Total_C_kg_per_ha	20	Block	1	10537.4	10537.4	0.00171985	0.967506
2012-11-16	0-7.6 cm	EquivSeg_Total_C_kg_per_ha	20	Residuals	14	8.57772e+07	6.12694e+06
2012-11-16	7.6-15 cm	EquivSeg_Total_C_kg_per_ha	20	Treatment_Level	4	1.67975e+07	4.19938e+06	0.871912	0.504977
2012-11-16	7.6-15 cm	EquivSeg_Total_C_kg_per_ha	20	Block	1	4.66932e+06	4.66932e+06	0.969485	0.34152
2012-11-16	7.6-15 cm	EquivSeg_Total_C_kg_per_ha	20	Residuals	14	6.74281e+07	4.81629e+06
2012-11-16	15-30 cm	EquivSeg_Total_C_kg_per_ha	20	Treatment_Level	4	4.66512e+06	1.16628e+06	0.100596	0.980462
2012-11-16	15-30 cm	EquivSeg_Total_C_kg_per_ha	20	Block	1	7.54621e+06	7.54621e+06	0.650887	0.433288
2012-11-16	15-30 cm	EquivSeg_Total_C_kg_per_ha	20	Residuals	14	1.62312e+08	1.15937e+07
2012-11-16	30-61 cm	EquivSeg_Total_C_kg_per_ha	20	Treatment_Level	4	3.6974e+08	9.2435e+07	0.298412	0.874129
2012-11-16	30-61 cm	EquivSeg_Total_C_kg_per_ha	20	Block	1	5.67077e+08	5.67077e+08	1.83072	0.197489
2012-11-16	30-61 cm	EquivSeg_Total_C_kg_per_ha	20	Residuals	14	4.33659e+09	3.09756e+08
2012-11-16	61-91 cm	EquivSeg_Total_C_kg_per_ha	20	Treatment_Level	4	8.90747e+07	2.22687e+07	0.20707	0.930229
2012-11-16	61-91 cm	EquivSeg_Total_C_kg_per_ha	20	Block	1	2.26975e+08	2.26975e+08	2.11058	0.168328
2012-11-16	61-91 cm	EquivSeg_Total_C_kg_per_ha	20	Residuals	14	1.50558e+09	1.07542e+08
2012-11-16	91-120 cm	EquivSeg_Total_C_kg_per_ha	20	Treatment_Level	4	6.17561e+07	1.5439e+07	0.284213	0.883336
2012-11-16	91-120 cm	EquivSeg_Total_C_kg_per_ha	20	Block	1	9.46343e+07	9.46343e+07	1.7421	0.208049
2012-11-16	91-120 cm	EquivSeg_Total_C_kg_per_ha	20	Residuals	14	7.60507e+08	5.43219e+07
2013-11-08	0-7.6 cm	EquivSeg_Total_C_kg_per_ha	20	Treatment_Level	4	4.08268e+07	1.02067e+07	3.77509	0.0276317
2013-11-08	0-7.6 cm	EquivSeg_Total_C_kg_per_ha	20	Block	1	1.67487e+07	1.67487e+07	6.19476	0.0260171
2013-11-08	0-7.6 cm	EquivSeg_Total_C_kg_per_ha	20	Residuals	14	3.78517e+07	2.70369e+06
2013-11-08	7.6-15 cm	EquivSeg_Total_C_kg_per_ha	20	Treatment_Level	4	2.27693e+07	5.69232e+06	2.07574	0.138478
2013-11-08	7.6-15 cm	EquivSeg_Total_C_kg_per_ha	20	Block	1	1.29878e+07	1.29878e+07	4.73609	0.0471497
2013-11-08	7.6-15 cm	EquivSeg_Total_C_kg_per_ha	20	Residuals	14	3.83923e+07	2.74231e+06
2013-11-08	15-30 cm	EquivSeg_Total_C_kg_per_ha	20	Treatment_Level	4	1.02939e+07	2.57346e+06	0.172904	0.948652
2013-11-08	15-30 cm	EquivSeg_Total_C_kg_per_ha	20	Block	1	1.85727e+07	1.85727e+07	1.24785	0.282769
2013-11-08	15-30 cm	EquivSeg_Total_C_kg_per_ha	20	Residuals	14	2.08373e+08	1.48838e+07
2013-11-08	30-61 cm	EquivSeg_Total_C_kg_per_ha	20	Treatment_Level	4	2.149e+08	5.37251e+07	0.275007	0.889228
2013-11-08	30-61 cm	EquivSeg_Total_C_kg_per_ha	20	Block	1	5.83212e+08	5.83212e+08	2.98534	0.106005
2013-11-08	30-61 cm	EquivSeg_Total_C_kg_per_ha	20	Residuals	14	2.73502e+09	1.95359e+08
2013-11-08	61-91 cm	EquivSeg_Total_C_kg_per_ha	20	Treatment_Level	4	9.75146e+07	2.43786e+07	0.326328	0.855666
2013-11-08	61-91 cm	EquivSeg_Total_C_kg_per_ha	20	Block	1	1.21613e+08	1.21613e+08	1.62788	0.222759
2013-11-08	61-91 cm	EquivSeg_Total_C_kg_per_ha	20	Residuals	14	1.04588e+09	7.4706e+07
2013-11-08	91-120 cm	EquivSeg_Total_C_kg_per_ha	20	Treatment_Level	4	2.95591e+07	7.38976e+06	0.26152	0.897736
2013-11-08	91-120 cm	EquivSeg_Total_C_kg_per_ha	20	Block	1	2.55481e+07	2.55481e+07	0.904135	0.357803
2013-11-08	91-120 cm	EquivSeg_Total_C_kg_per_ha	20	Residuals	14	3.95597e+08	2.8257e+07
2015-11-24	0-7.6 cm	EquivSeg_Total_C_kg_per_ha	17	Treatment_Level	4	1.49593e+08	3.73982e+07	10.2155	0.00105438
2015-11-24	0-7.6 cm	EquivSeg_Total_C_kg_per_ha	17	Block	1	8.15622e+06	8.15622e+06	2.22791	0.163652
2015-11-24	0-7.6 cm	EquivSeg_Total_C_kg_per_ha	17	Residuals	11	4.02702e+07	3.66093e+06
2015-11-24	7.6-15 cm	EquivSeg_Total_C_kg_per_ha	19	Treatment_Level	4	1.12798e+08	2.81996e+07	3.52155	0.0370918
2015-11-24	7.6-15 cm	EquivSeg_Total_C_kg_per_ha	19	Block	1	4.05699e+06	4.05699e+06	0.506634	0.489177
2015-11-24	7.6-15 cm	EquivSeg_Total_C_kg_per_ha	19	Residuals	13	1.041e+08	8.00773e+06
2015-11-24	15-30 cm	EquivSeg_Total_C_kg_per_ha	17	Treatment_Level	4	3.02908e+08	7.5727e+07	7.82964	0.00306746
2015-11-24	15-30 cm	EquivSeg_Total_C_kg_per_ha	17	Block	1	3.73141e+07	3.73141e+07	3.85802	0.0752752
2015-11-24	15-30 cm	EquivSeg_Total_C_kg_per_ha	17	Residuals	11	1.0639e+08	9.67183e+06
2015-11-24	30-61 cm	EquivSeg_Total_C_kg_per_ha	20	Treatment_Level	4	3.80454e+08	9.51135e+07	0.447591	0.772498
2015-11-24	30-61 cm	EquivSeg_Total_C_kg_per_ha	20	Block	1	9.7171e+08	9.7171e+08	4.57273	0.0505982
2015-11-24	30-61 cm	EquivSeg_Total_C_kg_per_ha	20	Residuals	14	2.97501e+09	2.12501e+08
2015-11-24	61-91 cm	EquivSeg_Total_C_kg_per_ha	19	Treatment_Level	4	2.6321e+06	658026	0.00683685	0.999893
2015-11-24	61-91 cm	EquivSeg_Total_C_kg_per_ha	19	Block	1	3.85297e+08	3.85297e+08	4.00322	0.0667442
2015-11-24	61-91 cm	EquivSeg_Total_C_kg_per_ha	19	Residuals	13	1.25121e+09	9.6247e+07
2015-11-24	91-120 cm	EquivSeg_Total_C_kg_per_ha	19	Treatment_Level	4	7.5552e+07	1.8888e+07	0.80602	0.542935
2015-11-24	91-120 cm	EquivSeg_Total_C_kg_per_ha	19	Block	1	6.41887e+07	6.41887e+07	2.73917	0.121844
2015-11-24	91-120 cm	EquivSeg_Total_C_kg_per_ha	19	Residuals	13	3.04638e+08	2.34337e+07
2016-11-16	0-7.6 cm	EquivSeg_Total_C_kg_per_ha	20	Treatment_Level	4	7.48111e+07	1.87028e+07	1.2369	0.339995
2016-11-16	0-7.6 cm	EquivSeg_Total_C_kg_per_ha	20	Block	1	3.22213e+06	3.22213e+06	0.213094	0.651444
2016-11-16	0-7.6 cm	EquivSeg_Total_C_kg_per_ha	20	Residuals	14	2.1169e+08	1.51207e+07
2016-11-16	7.6-15 cm	EquivSeg_Total_C_kg_per_ha	20	Treatment_Level	4	8.38291e+07	2.09573e+07	1.9133	0.164092
2016-11-16	7.6-15 cm	EquivSeg_Total_C_kg_per_ha	20	Block	1	1.65252e+07	1.65252e+07	1.50867	0.239592
2016-11-16	7.6-15 cm	EquivSeg_Total_C_kg_per_ha	20	Residuals	14	1.53349e+08	1.09535e+07
2016-11-16	15-30 cm	EquivSeg_Total_C_kg_per_ha	20	Treatment_Level	4	4.98237e+07	1.24559e+07	0.435881	0.780611
2016-11-16	15-30 cm	EquivSeg_Total_C_kg_per_ha	20	Block	1	7.19875e+07	7.19875e+07	2.51912	0.134795
2016-11-16	15-30 cm	EquivSeg_Total_C_kg_per_ha	20	Residuals	14	4.0007e+08	2.85764e+07
2016-11-16	30-61 cm	EquivSeg_Total_C_kg_per_ha	20	Treatment_Level	4	1.53321e+08	3.83304e+07	0.232049	0.915735
2016-11-16	30-61 cm	EquivSeg_Total_C_kg_per_ha	20	Block	1	1.28535e+08	1.28535e+08	0.778141	0.392604
2016-11-16	30-61 cm	EquivSeg_Total_C_kg_per_ha	20	Residuals	14	2.31255e+09	1.65182e+08
2016-11-16	61-91 cm	EquivSeg_Total_C_kg_per_ha	20	Treatment_Level	4	2.64542e+08	6.61356e+07	1.1157	0.388053
2016-11-16	61-91 cm	EquivSeg_Total_C_kg_per_ha	20	Block	1	2.38483e+07	2.38483e+07	0.402319	0.536121
2016-11-16	61-91 cm	EquivSeg_Total_C_kg_per_ha	20	Residuals	14	8.29878e+08	5.9277e+07
2016-11-16	91-120 cm	EquivSeg_Total_C_kg_per_ha	20	Treatment_Level	4	1.1725e+08	2.93126e+07	2.1054	0.134289
2016-11-16	91-120 cm	EquivSeg_Total_C_kg_per_ha	20	Block	1	5.67944e+07	5.67944e+07	4.07931	0.062978
2016-11-16	91-120 cm	EquivSeg_Total_C_kg_per_ha	20	Residuals	14	1.94916e+08	1.39226e+07
2017-11-13	0-7.6 cm	EquivSeg_Total_C_kg_per_ha	20	Treatment_Level	4	9.21e+07	2.3025e+07	6.24915	0.00421736
2017-11-13	0-7.6 cm	EquivSeg_Total_C_kg_per_ha	20	Block	1	1.51412e+06	1.51412e+06	0.410942	0.531846
2017-11-13	0-7.6 cm	EquivSeg_Total_C_kg_per_ha	20	Residuals	14	5.1583e+07	3.6845e+06
2017-11-13	7.6-15 cm	EquivSeg_Total_C_kg_per_ha	20	Treatment_Level	4	1.08913e+08	2.72283e+07	6.92645	0.00271385
2017-11-13	7.6-15 cm	EquivSeg_Total_C_kg_per_ha	20	Block	1	1.41358e+06	1.41358e+06	0.359593	0.558313
2017-11-13	7.6-15 cm	EquivSeg_Total_C_kg_per_ha	20	Residuals	14	5.50349e+07	3.93106e+06
2017-11-13	15-30 cm	EquivSeg_Total_C_kg_per_ha	19	Treatment_Level	4	7.55645e+07	1.88911e+07	1.62041	0.22809
2017-11-13	15-30 cm	EquivSeg_Total_C_kg_per_ha	19	Block	1	1.18086e+06	1.18086e+06	0.10129	0.755342
2017-11-13	15-30 cm	EquivSeg_Total_C_kg_per_ha	19	Residuals	13	1.51557e+08	1.16582e+07
2017-11-13	30-61 cm	EquivSeg_Total_C_kg_per_ha	19	Treatment_Level	4	2.56897e+08	6.42241e+07	0.281113	0.884984
2017-11-13	30-61 cm	EquivSeg_Total_C_kg_per_ha	19	Block	1	5.36749e+08	5.36749e+08	2.34938	0.149301
2017-11-13	30-61 cm	EquivSeg_Total_C_kg_per_ha	19	Residuals	13	2.97003e+09	2.28464e+08
2017-11-13	61-91 cm	EquivSeg_Total_C_kg_per_ha	18	Treatment_Level	4	1.56794e+07	3.91985e+06	0.0301713	0.997986
2017-11-13	61-91 cm	EquivSeg_Total_C_kg_per_ha	18	Block	1	2.19344e+08	2.19344e+08	1.6883	0.218234
2017-11-13	61-91 cm	EquivSeg_Total_C_kg_per_ha	18	Residuals	12	1.55904e+09	1.2992e+08
2017-11-13	91-120 cm	EquivSeg_Total_C_kg_per_ha	19	Treatment_Level	4	5.91055e+07	1.47764e+07	0.376683	0.821249
2017-11-13	91-120 cm	EquivSeg_Total_C_kg_per_ha	19	Block	1	1.13324e+08	1.13324e+08	2.88889	0.112979
2017-11-13	91-120 cm	EquivSeg_Total_C_kg_per_ha	19	Residuals	13	5.09959e+08	3.92276e+07
2012-02-01	0-7.6 cm	EquivSeg_Total_N_kg_per_ha	20	Treatment_Level	4	30707.7	7676.93	1.69725	0.206407
2012-02-01	0-7.6 cm	EquivSeg_Total_N_kg_per_ha	20	Block	1	148.843	148.843	0.0329068	0.858652
2012-02-01	0-7.6 cm	EquivSeg_Total_N_kg_per_ha	20	Residuals	14	63324.3	4523.16
2012-02-01	7.6-15 cm	EquivSeg_Total_N_kg_per_ha	20	Treatment_Level	4	25052.9	6263.23	1.00522	0.437541
2012-02-01	7.6-15 cm	EquivSeg_Total_N_kg_per_ha	20	Block	1	4922.91	4922.91	0.790106	0.389086
2012-02-01	7.6-15 cm	EquivSeg_Total_N_kg_per_ha	20	Residuals	14	87229.6	6230.69
2012-02-01	15-30 cm	EquivSeg_Total_N_kg_per_ha	20	Treatment_Level	4	161159	40289.7	0.516885	0.724727
2012-02-01	15-30 cm	EquivSeg_Total_N_kg_per_ha	20	Block	1	84672.2	84672.2	1.08628	0.314962
2012-02-01	15-30 cm	EquivSeg_Total_N_kg_per_ha	20	Residuals	14	1.09126e+06	77947
2012-02-01	30-61 cm	EquivSeg_Total_N_kg_per_ha	20	Treatment_Level	4	351563	87890.7	0.289285	0.880064
2012-02-01	30-61 cm	EquivSeg_Total_N_kg_per_ha	20	Block	1	419637	419637	1.3812	0.259498
2012-02-01	30-61 cm	EquivSeg_Total_N_kg_per_ha	20	Residuals	14	4.25349e+06	303821
2012-02-01	61-91 cm	EquivSeg_Total_N_kg_per_ha	20	Treatment_Level	4	218724	54681.1	0.392214	0.810813
2012-02-01	61-91 cm	EquivSeg_Total_N_kg_per_ha	20	Block	1	599293	599293	4.29858	0.0570788
2012-02-01	61-91 cm	EquivSeg_Total_N_kg_per_ha	20	Residuals	14	1.95183e+06	139416
2012-02-01	91-120 cm	EquivSeg_Total_N_kg_per_ha	20	Treatment_Level	4	165354	41338.5	0.398586	0.806418
2012-02-01	91-120 cm	EquivSeg_Total_N_kg_per_ha	20	Block	1	806321	806321	7.77455	0.0145109
2012-02-01	91-120 cm	EquivSeg_Total_N_kg_per_ha	20	Residuals	14	1.45198e+06	103713
2012-11-16	0-7.6 cm	EquivSeg_Total_N_kg_per_ha	20	Treatment_Level	4	471524	117881	7.7264	0.00166548
2012-11-16	0-7.6 cm	EquivSeg_Total_N_kg_per_ha	20	Block	1	73859.8	73859.8	4.84107	0.0450797
2012-11-16	0-7.6 cm	EquivSeg_Total_N_kg_per_ha	20	Residuals	14	213597	15256.9
2012-11-16	7.6-15 cm	EquivSeg_Total_N_kg_per_ha	20	Treatment_Level	4	252741	63185.2	4.39775	0.0164421
2012-11-16	7.6-15 cm	EquivSeg_Total_N_kg_per_ha	20	Block	1	48801.2	48801.2	3.39661	0.0866033
2012-11-16	7.6-15 cm	EquivSeg_Total_N_kg_per_ha	20	Residuals	14	201147	14367.6
2012-11-16	15-30 cm	EquivSeg_Total_N_kg_per_ha	20	Treatment_Level	4	115117	28779.2	0.353523	0.837321
2012-11-16	15-30 cm	EquivSeg_Total_N_kg_per_ha	20	Block	1	184495	184495	2.26633	0.154438
2012-11-16	15-30 cm	EquivSeg_Total_N_kg_per_ha	20	Residuals	14	1.1397e+06	81407.1
2012-11-16	30-61 cm	EquivSeg_Total_N_kg_per_ha	20	Treatment_Level	4	657647	164412	0.394003	0.80958
2012-11-16	30-61 cm	EquivSeg_Total_N_kg_per_ha	20	Block	1	915409	915409	2.19372	0.160728
2012-11-16	30-61 cm	EquivSeg_Total_N_kg_per_ha	20	Residuals	14	5.842e+06	417286
2012-11-16	61-91 cm	EquivSeg_Total_N_kg_per_ha	20	Treatment_Level	4	77447.7	19361.9	0.15629	0.956917
2012-11-16	61-91 cm	EquivSeg_Total_N_kg_per_ha	20	Block	1	878827	878827	7.09393	0.0185359
2012-11-16	61-91 cm	EquivSeg_Total_N_kg_per_ha	20	Residuals	14	1.73438e+06	123884
2012-11-16	91-120 cm	EquivSeg_Total_N_kg_per_ha	20	Treatment_Level	4	251161	62790.2	0.525061	0.719142
2012-11-16	91-120 cm	EquivSeg_Total_N_kg_per_ha	20	Block	1	812742	812742	6.79627	0.0206948
2012-11-16	91-120 cm	EquivSeg_Total_N_kg_per_ha	20	Residuals	14	1.67421e+06	119586
2013-11-08	0-7.6 cm	EquivSeg_Total_N_kg_per_ha	20	Treatment_Level	4	462070	115518	10.0985	0.00046378
2013-11-08	0-7.6 cm	EquivSeg_Total_N_kg_per_ha	20	Block	1	101729	101729	8.8931	0.0098958
2013-11-08	0-7.6 cm	EquivSeg_Total_N_kg_per_ha	20	Residuals	14	160147	11439.1
2013-11-08	7.6-15 cm	EquivSeg_Total_N_kg_per_ha	20	Treatment_Level	4	262316	65579.1	6.61861	0.00330494
2013-11-08	7.6-15 cm	EquivSeg_Total_N_kg_per_ha	20	Block	1	92822.4	92822.4	9.36817	0.00846728
2013-11-08	7.6-15 cm	EquivSeg_Total_N_kg_per_ha	20	Residuals	14	138716	9908.28
2013-11-08	15-30 cm	EquivSeg_Total_N_kg_per_ha	20	Treatment_Level	4	44256.4	11064.1	0.291026	0.878936
2013-11-08	15-30 cm	EquivSeg_Total_N_kg_per_ha	20	Block	1	212985	212985	5.60227	0.0328852
2013-11-08	15-30 cm	EquivSeg_Total_N_kg_per_ha	20	Residuals	14	532245	38017.5
2013-11-08	30-61 cm	EquivSeg_Total_N_kg_per_ha	20	Treatment_Level	4	356914	89228.6	0.303203	0.870993
2013-11-08	30-61 cm	EquivSeg_Total_N_kg_per_ha	20	Block	1	340342	340342	1.1565	0.300378
2013-11-08	30-61 cm	EquivSeg_Total_N_kg_per_ha	20	Residuals	14	4.12002e+06	294287
2013-11-08	61-91 cm	EquivSeg_Total_N_kg_per_ha	20	Treatment_Level	4	172728	43181.9	1.19477	0.355996
2013-11-08	61-91 cm	EquivSeg_Total_N_kg_per_ha	20	Block	1	1.0396e+06	1.0396e+06	28.7638	0.00010004
2013-11-08	61-91 cm	EquivSeg_Total_N_kg_per_ha	20	Residuals	14	505996	36142.6
2013-11-08	91-120 cm	EquivSeg_Total_N_kg_per_ha	20	Treatment_Level	4	57046.3	14261.6	0.346928	0.841796
2013-11-08	91-120 cm	EquivSeg_Total_N_kg_per_ha	20	Block	1	1.2423e+06	1.2423e+06	30.2202	7.86103e-05
2013-11-08	91-120 cm	EquivSeg_Total_N_kg_per_ha	20	Residuals	14	575515	41108.2
2015-11-24	0-7.6 cm	EquivSeg_Total_N_kg_per_ha	17	Treatment_Level	4	1.20648e+06	301620	6.56767	0.00593294
2015-11-24	0-7.6 cm	EquivSeg_Total_N_kg_per_ha	17	Block	1	181645	181645	3.95525	0.0721771
2015-11-24	0-7.6 cm	EquivSeg_Total_N_kg_per_ha	17	Residuals	11	505175	45925
2015-11-24	7.6-15 cm	EquivSeg_Total_N_kg_per_ha	20	Treatment_Level	4	890113	222528	7.37815	0.00205159
2015-11-24	7.6-15 cm	EquivSeg_Total_N_kg_per_ha	20	Block	1	285355	285355	9.46124	0.00821616
2015-11-24	7.6-15 cm	EquivSeg_Total_N_kg_per_ha	20	Residuals	14	422246	30160.4
2015-11-24	15-30 cm	EquivSeg_Total_N_kg_per_ha	20	Treatment_Level	4	1.91002e+06	477505	4.19108	0.0194587
2015-11-24	15-30 cm	EquivSeg_Total_N_kg_per_ha	20	Block	1	551439	551439	4.84001	0.0451002
2015-11-24	15-30 cm	EquivSeg_Total_N_kg_per_ha	20	Residuals	14	1.59507e+06	113934
2015-11-24	30-61 cm	EquivSeg_Total_N_kg_per_ha	19	Treatment_Level	4	286922	71730.5	0.190672	0.939003
2015-11-24	30-61 cm	EquivSeg_Total_N_kg_per_ha	19	Block	1	1.14809e+06	1.14809e+06	3.05183	0.104212
2015-11-24	30-61 cm	EquivSeg_Total_N_kg_per_ha	19	Residuals	13	4.89057e+06	376198
2015-11-24	61-91 cm	EquivSeg_Total_N_kg_per_ha	19	Treatment_Level	4	206528	51631.9	1.09771	0.398416
2015-11-24	61-91 cm	EquivSeg_Total_N_kg_per_ha	19	Block	1	62482.6	62482.6	1.3284	0.269844
2015-11-24	61-91 cm	EquivSeg_Total_N_kg_per_ha	19	Residuals	13	611468	47036
2015-11-24	91-120 cm	EquivSeg_Total_N_kg_per_ha	20	Treatment_Level	4	263659	65914.6	1.11005	0.390449
2015-11-24	91-120 cm	EquivSeg_Total_N_kg_per_ha	20	Block	1	8044.64	8044.64	0.135478	0.718324
2015-11-24	91-120 cm	EquivSeg_Total_N_kg_per_ha	20	Residuals	14	831317	59379.8
2016-11-16	0-7.6 cm	EquivSeg_Total_N_kg_per_ha	20	Treatment_Level	4	792344	198086	4.15545	0.0200397
2016-11-16	0-7.6 cm	EquivSeg_Total_N_kg_per_ha	20	Block	1	52377.4	52377.4	1.09877	0.312295
2016-11-16	0-7.6 cm	EquivSeg_Total_N_kg_per_ha	20	Residuals	14	667365	47668.9
2016-11-16	7.6-15 cm	EquivSeg_Total_N_kg_per_ha	20	Treatment_Level	4	870317	217579	7.99471	0.00142404
2016-11-16	7.6-15 cm	EquivSeg_Total_N_kg_per_ha	20	Block	1	149.389	149.389	0.00548914	0.941988
2016-11-16	7.6-15 cm	EquivSeg_Total_N_kg_per_ha	20	Residuals	14	381016	27215.4
2016-11-16	15-30 cm	EquivSeg_Total_N_kg_per_ha	20	Treatment_Level	4	1.22593e+06	306483	1.69137	0.207712
2016-11-16	15-30 cm	EquivSeg_Total_N_kg_per_ha	20	Block	1	10203	10203	0.0563063	0.815869
2016-11-16	15-30 cm	EquivSeg_Total_N_kg_per_ha	20	Residuals	14	2.53686e+06	181204
2016-11-16	30-61 cm	EquivSeg_Total_N_kg_per_ha	20	Treatment_Level	4	275988	68997	0.295375	0.87611
2016-11-16	30-61 cm	EquivSeg_Total_N_kg_per_ha	20	Block	1	290052	290052	1.24171	0.283907
2016-11-16	30-61 cm	EquivSeg_Total_N_kg_per_ha	20	Residuals	14	3.27028e+06	233591
2016-11-16	61-91 cm	EquivSeg_Total_N_kg_per_ha	20	Treatment_Level	4	233259	58314.9	0.638948	0.643338
2016-11-16	61-91 cm	EquivSeg_Total_N_kg_per_ha	20	Block	1	5686.42	5686.42	0.0623054	0.806514
2016-11-16	61-91 cm	EquivSeg_Total_N_kg_per_ha	20	Residuals	14	1.27774e+06	91267
2016-11-16	91-120 cm	EquivSeg_Total_N_kg_per_ha	20	Treatment_Level	4	143927	35981.7	1.89751	0.166843
2016-11-16	91-120 cm	EquivSeg_Total_N_kg_per_ha	20	Block	1	261041	261041	13.7661	0.00232949
2016-11-16	91-120 cm	EquivSeg_Total_N_kg_per_ha	20	Residuals	14	265477	18962.6
2017-11-13	0-7.6 cm	EquivSeg_Total_N_kg_per_ha	20	Treatment_Level	4	1.06002e+06	265005	29.2217	1.16156e-06
2017-11-13	0-7.6 cm	EquivSeg_Total_N_kg_per_ha	20	Block	1	21942.8	21942.8	2.4196	0.142137
2017-11-13	0-7.6 cm	EquivSeg_Total_N_kg_per_ha	20	Residuals	14	126963	9068.79
2017-11-13	7.6-15 cm	EquivSeg_Total_N_kg_per_ha	20	Treatment_Level	4	1.08962e+06	272406	19.6168	1.26578e-05
2017-11-13	7.6-15 cm	EquivSeg_Total_N_kg_per_ha	20	Block	1	23804.4	23804.4	1.71422	0.21152
2017-11-13	7.6-15 cm	EquivSeg_Total_N_kg_per_ha	20	Residuals	14	194410	13886.4
2017-11-13	15-30 cm	EquivSeg_Total_N_kg_per_ha	20	Treatment_Level	4	255046	63761.6	1.62742	0.222473
2017-11-13	15-30 cm	EquivSeg_Total_N_kg_per_ha	20	Block	1	120649	120649	3.07939	0.10114
2017-11-13	15-30 cm	EquivSeg_Total_N_kg_per_ha	20	Residuals	14	548513	39179.5
2017-11-13	30-61 cm	EquivSeg_Total_N_kg_per_ha	20	Treatment_Level	4	486051	121513	0.343543	0.844087
2017-11-13	30-61 cm	EquivSeg_Total_N_kg_per_ha	20	Block	1	488282	488282	1.38048	0.259616
2017-11-13	30-61 cm	EquivSeg_Total_N_kg_per_ha	20	Residuals	14	4.95186e+06	353704
2017-11-13	61-91 cm	EquivSeg_Total_N_kg_per_ha	20	Treatment_Level	4	52696.6	13174.2	0.23266	0.915371
2017-11-13	61-91 cm	EquivSeg_Total_N_kg_per_ha	20	Block	1	230050	230050	4.06276	0.063452
2017-11-13	61-91 cm	EquivSeg_Total_N_kg_per_ha	20	Residuals	14	792737	56624.1
2017-11-13	91-120 cm	EquivSeg_Total_N_kg_per_ha	19	Treatment_Level	4	37881.3	9470.33	0.167642	0.951066
2017-11-13	91-120 cm	EquivSeg_Total_N_kg_per_ha	19	Block	1	243299	243299	4.30683	0.0583684
2017-11-13	91-120 cm	EquivSeg_Total_N_kg_per_ha	19	Residuals	13	734389	56491.4
2012-02-01	0-7.6 cm	Extractable_P_pct	19	Treatment_Level	4	1.43512e-05	3.5878e-06	4.33913	0.0190373
2012-02-01	0-7.6 cm	Extractable_P_pct	19	Block	1	1.56089e-06	1.56089e-06	1.88777	0.192681
2012-02-01	0-7.6 cm	Extractable_P_pct	19	Residuals	13	1.0749e-05	8.26847e-07
2012-02-01	7.6-15 cm	Extractable_P_pct	20	Treatment_Level	4	1.85059e-08	4.62649e-09	0.446712	0.773106
2012-02-01	7.6-15 cm	Extractable_P_pct	20	Block	1	3.63599e-08	3.63599e-08	3.51074	0.0819971
2012-02-01	7.6-15 cm	Extractable_P_pct	20	Residuals	14	1.44995e-07	1.03568e-08
2012-02-01	15-30 cm	Extractable_P_pct	20	Treatment_Level	4	1.80761e-08	4.51904e-09	1.19548	0.355718
2012-02-01	15-30 cm	Extractable_P_pct	20	Block	1	2.44351e-09	2.44351e-09	0.646414	0.434838
2012-02-01	15-30 cm	Extractable_P_pct	20	Residuals	14	5.29213e-08	3.7801e-09
2012-11-16	0-7.6 cm	Extractable_P_pct	20	Treatment_Level	4	0.00015065	3.76625e-05	11.4879	0.00024105
2012-11-16	0-7.6 cm	Extractable_P_pct	20	Block	1	1.28806e-06	1.28806e-06	0.392888	0.540873
2012-11-16	0-7.6 cm	Extractable_P_pct	20	Residuals	14	4.58982e-05	3.27844e-06
2012-11-16	7.6-15 cm	Extractable_P_pct	20	Treatment_Level	4	6.35485e-05	1.58871e-05	7.27566	0.00218397
2012-11-16	7.6-15 cm	Extractable_P_pct	20	Block	1	4.88831e-07	4.88831e-07	0.223865	0.643403
2012-11-16	7.6-15 cm	Extractable_P_pct	20	Residuals	14	3.05704e-05	2.1836e-06
2012-11-16	15-30 cm	Extractable_P_pct	20	Treatment_Level	4	1.56284e-07	3.90711e-08	3.18283	0.0468414
2012-11-16	15-30 cm	Extractable_P_pct	20	Block	1	6.57243e-09	6.57243e-09	0.535408	0.476413
2012-11-16	15-30 cm	Extractable_P_pct	20	Residuals	14	1.71858e-07	1.22756e-08
2013-11-08	0-7.6 cm	Extractable_P_pct	20	Treatment_Level	4	0.000230977	5.77444e-05	43.8712	8.99378e-08
2013-11-08	0-7.6 cm	Extractable_P_pct	20	Block	1	1.40034e-06	1.40034e-06	1.06391	0.319816
2013-11-08	0-7.6 cm	Extractable_P_pct	20	Residuals	14	1.84272e-05	1.31623e-06
2013-11-08	7.6-15 cm	Extractable_P_pct	19	Treatment_Level	4	0.000225452	5.63631e-05	31.1557	1.50354e-06
2013-11-08	7.6-15 cm	Extractable_P_pct	19	Block	1	3.00031e-06	3.00031e-06	1.65847	0.220262
2013-11-08	7.6-15 cm	Extractable_P_pct	19	Residuals	13	2.3518e-05	1.80908e-06
2013-11-08	15-30 cm	Extractable_P_pct	20	Treatment_Level	4	3.56739e-07	8.91848e-08	2.28185	0.112072
2013-11-08	15-30 cm	Extractable_P_pct	20	Block	1	1.90603e-07	1.90603e-07	4.87671	0.0444015
2013-11-08	15-30 cm	Extractable_P_pct	20	Residuals	14	5.47183e-07	3.90845e-08
2016-11-16	0-7.6 cm	Extractable_P_pct	20	Treatment_Level	4	0.000383377	9.58443e-05	25.2118	2.85861e-06
2016-11-16	0-7.6 cm	Extractable_P_pct	20	Block	1	3.35675e-06	3.35675e-06	0.882993	0.363314
2016-11-16	0-7.6 cm	Extractable_P_pct	20	Residuals	14	5.32218e-05	3.80156e-06
2016-11-16	7.6-15 cm	Extractable_P_pct	20	Treatment_Level	4	0.00040438	0.000101095	24.5458	3.35949e-06
2016-11-16	7.6-15 cm	Extractable_P_pct	20	Block	1	4.6405e-06	4.6405e-06	1.12671	0.306447
2016-11-16	7.6-15 cm	Extractable_P_pct	20	Residuals	14	5.76608e-05	4.11863e-06
2016-11-16	15-30 cm	Extractable_P_pct	20	Treatment_Level	4	9.53285e-07	2.38321e-07	6.14576	0.00452184
2016-11-16	15-30 cm	Extractable_P_pct	20	Block	1	1.96431e-09	1.96431e-09	0.0506551	0.825179
2016-11-16	15-30 cm	Extractable_P_pct	20	Residuals	14	5.42894e-07	3.87781e-08
2012-02-01	0-7.6 cm	Inorganic_C_pct	20	Treatment_Level	4	0.00172014	0.000430036	0.0122296	0.999665
2012-02-01	0-7.6 cm	Inorganic_C_pct	20	Block	1	0.0967414	0.0967414	2.75119	0.119409
2012-02-01	0-7.6 cm	Inorganic_C_pct	20	Residuals	14	0.492289	0.0351635
2012-02-01	7.6-15 cm	Inorganic_C_pct	20	Treatment_Level	4	0.000632934	0.000158234	0.00322501	0.999976
2012-02-01	7.6-15 cm	Inorganic_C_pct	20	Block	1	0.106408	0.106408	2.16874	0.162966
2012-02-01	7.6-15 cm	Inorganic_C_pct	20	Residuals	14	0.686904	0.0490646
2012-02-01	15-30 cm	Inorganic_C_pct	20	Treatment_Level	4	0.0204618	0.00511545	0.141873	0.963665
2012-02-01	15-30 cm	Inorganic_C_pct	20	Block	1	0.000252737	0.000252737	0.00700945	0.934462
2012-02-01	15-30 cm	Inorganic_C_pct	20	Residuals	14	0.504793	0.0360566
2012-02-01	30-61 cm	Inorganic_C_pct	20	Treatment_Level	4	0.286577	0.0716443	0.753651	0.572056
2012-02-01	30-61 cm	Inorganic_C_pct	20	Block	1	0.017437	0.017437	0.183425	0.674962
2012-02-01	30-61 cm	Inorganic_C_pct	20	Residuals	14	1.33088	0.095063
2012-02-01	61-91 cm	Inorganic_C_pct	20	Treatment_Level	4	0.0429072	0.0107268	0.515262	0.725838
2012-02-01	61-91 cm	Inorganic_C_pct	20	Block	1	0.0197496	0.0197496	0.94867	0.346588
2012-02-01	61-91 cm	Inorganic_C_pct	20	Residuals	14	0.291454	0.0208182
2012-02-01	91-120 cm	Inorganic_C_pct	20	Treatment_Level	4	0.0212172	0.0053043	0.515116	0.725937
2012-02-01	91-120 cm	Inorganic_C_pct	20	Block	1	2.89961e-05	2.89961e-05	0.0028159	0.95843
2012-02-01	91-120 cm	Inorganic_C_pct	20	Residuals	14	0.144162	0.0102973
2012-11-16	0-7.6 cm	Inorganic_C_pct	20	Treatment_Level	4	0.00269367	0.000673418	0.0145306	0.999529
2012-11-16	0-7.6 cm	Inorganic_C_pct	20	Block	1	0.0360258	0.0360258	0.777342	0.392841
2012-11-16	0-7.6 cm	Inorganic_C_pct	20	Residuals	14	0.648828	0.0463448
2012-11-16	7.6-15 cm	Inorganic_C_pct	20	Treatment_Level	4	0.0047791	0.00119477	0.0235288	0.998784
2012-11-16	7.6-15 cm	Inorganic_C_pct	20	Block	1	0.0488716	0.0488716	0.962433	0.343225
2012-11-16	7.6-15 cm	Inorganic_C_pct	20	Residuals	14	0.710909	0.0507792
2012-11-16	15-30 cm	Inorganic_C_pct	20	Treatment_Level	4	0.0205055	0.00512637	0.0959133	0.982102
2012-11-16	15-30 cm	Inorganic_C_pct	20	Block	1	6.29804e-06	6.29804e-06	0.000117835	0.991492
2012-11-16	15-30 cm	Inorganic_C_pct	20	Residuals	14	0.748271	0.0534479
2012-11-16	30-61 cm	Inorganic_C_pct	20	Treatment_Level	4	0.15121	0.0378026	0.429555	0.784993
2012-11-16	30-61 cm	Inorganic_C_pct	20	Block	1	0.289932	0.289932	3.29453	0.0909884
2012-11-16	30-61 cm	Inorganic_C_pct	20	Residuals	14	1.23206	0.0880041
2012-11-16	61-91 cm	Inorganic_C_pct	20	Treatment_Level	4	0.0404612	0.0101153	0.262324	0.897234
2012-11-16	61-91 cm	Inorganic_C_pct	20	Block	1	0.0966548	0.0966548	2.50659	0.135693
2012-11-16	61-91 cm	Inorganic_C_pct	20	Residuals	14	0.539844	0.0385603
2012-11-16	91-120 cm	Inorganic_C_pct	20	Treatment_Level	4	0.0298894	0.00747235	0.38092	0.818587
2012-11-16	91-120 cm	Inorganic_C_pct	20	Block	1	0.0186335	0.0186335	0.949886	0.346289
2012-11-16	91-120 cm	Inorganic_C_pct	20	Residuals	14	0.274632	0.0196166
2013-11-08	0-7.6 cm	Inorganic_C_pct	20	Treatment_Level	4	0.00324332	0.00081083	0.0176426	0.99931
2013-11-08	0-7.6 cm	Inorganic_C_pct	20	Block	1	0.0783068	0.0783068	1.70385	0.21283
2013-11-08	0-7.6 cm	Inorganic_C_pct	20	Residuals	14	0.643421	0.0459586
2013-11-08	7.6-15 cm	Inorganic_C_pct	20	Treatment_Level	4	0.0113328	0.0028332	0.0656205	0.991191
2013-11-08	7.6-15 cm	Inorganic_C_pct	20	Block	1	0.0629127	0.0629127	1.45714	0.247386
2013-11-08	7.6-15 cm	Inorganic_C_pct	20	Residuals	14	0.604458	0.0431756
2013-11-08	15-30 cm	Inorganic_C_pct	20	Treatment_Level	4	0.0173602	0.00434005	0.0899979	0.984087
2013-11-08	15-30 cm	Inorganic_C_pct	20	Block	1	0.0669853	0.0669853	1.38905	0.25821
2013-11-08	15-30 cm	Inorganic_C_pct	20	Residuals	14	0.675135	0.0482239
2013-11-08	30-61 cm	Inorganic_C_pct	20	Treatment_Level	4	0.136849	0.0342123	0.761512	0.567388
2013-11-08	30-61 cm	Inorganic_C_pct	20	Block	1	0.265513	0.265513	5.90991	0.0290853
2013-11-08	30-61 cm	Inorganic_C_pct	20	Residuals	14	0.628975	0.0449268
2013-11-08	61-91 cm	Inorganic_C_pct	19	Treatment_Level	4	0.0238536	0.00596341	0.332752	0.851049
2013-11-08	61-91 cm	Inorganic_C_pct	19	Block	1	0.0135253	0.0135253	0.754697	0.400747
2013-11-08	61-91 cm	Inorganic_C_pct	19	Residuals	13	0.23298	0.0179215
2013-11-08	91-120 cm	Inorganic_C_pct	20	Treatment_Level	4	0.00879904	0.00219976	0.173714	0.948237
2013-11-08	91-120 cm	Inorganic_C_pct	20	Block	1	0.0264648	0.0264648	2.08991	0.170287
2013-11-08	91-120 cm	Inorganic_C_pct	20	Residuals	14	0.177283	0.0126631
2015-11-24	0-7.6 cm	Inorganic_C_pct	20	Treatment_Level	4	0.0130718	0.00326795	0.0549858	0.993704
2015-11-24	0-7.6 cm	Inorganic_C_pct	20	Block	1	0.0696023	0.0696023	1.17111	0.297461
2015-11-24	0-7.6 cm	Inorganic_C_pct	20	Residuals	14	0.832057	0.0594326
2015-11-24	7.6-15 cm	Inorganic_C_pct	20	Treatment_Level	4	0.0116039	0.00290099	0.0435999	0.995965
2015-11-24	7.6-15 cm	Inorganic_C_pct	20	Block	1	0.0873566	0.0873566	1.31291	0.271077
2015-11-24	7.6-15 cm	Inorganic_C_pct	20	Residuals	14	0.931511	0.0665365
2015-11-24	15-30 cm	Inorganic_C_pct	20	Treatment_Level	4	0.00833644	0.00208411	0.0271921	0.998386
2015-11-24	15-30 cm	Inorganic_C_pct	20	Block	1	0.151559	0.151559	1.97744	0.181467
2015-11-24	15-30 cm	Inorganic_C_pct	20	Residuals	14	1.07302	0.076644
2015-11-24	30-61 cm	Inorganic_C_pct	20	Treatment_Level	4	0.104692	0.026173	0.503735	0.733739
2015-11-24	30-61 cm	Inorganic_C_pct	20	Block	1	0.266112	0.266112	5.12168	0.0400505
2015-11-24	30-61 cm	Inorganic_C_pct	20	Residuals	14	0.72741	0.0519579
2015-11-24	61-91 cm	Inorganic_C_pct	20	Treatment_Level	4	0.00386804	0.00096701	0.0250633	0.998624
2015-11-24	61-91 cm	Inorganic_C_pct	20	Block	1	0.145571	0.145571	3.77297	0.0724794
2015-11-24	61-91 cm	Inorganic_C_pct	20	Residuals	14	0.540157	0.0385827
2015-11-24	91-120 cm	Inorganic_C_pct	19	Treatment_Level	4	0.080316	0.020079	1.9797	0.157142
2015-11-24	91-120 cm	Inorganic_C_pct	19	Block	1	0.0478393	0.0478393	4.71673	0.0489649
2015-11-24	91-120 cm	Inorganic_C_pct	19	Residuals	13	0.131852	0.0101425
2016-11-16	0-7.6 cm	Inorganic_C_pct	20	Treatment_Level	4	0.00254631	0.000636576	0.0143333	0.999542
2016-11-16	0-7.6 cm	Inorganic_C_pct	20	Block	1	0.0698853	0.0698853	1.57355	0.230232
2016-11-16	0-7.6 cm	Inorganic_C_pct	20	Residuals	14	0.621776	0.0444125
2016-11-16	7.6-15 cm	Inorganic_C_pct	20	Treatment_Level	4	0.00892047	0.00223012	0.0471077	0.995317
2016-11-16	7.6-15 cm	Inorganic_C_pct	20	Block	1	0.0567235	0.0567235	1.19819	0.292159
2016-11-16	7.6-15 cm	Inorganic_C_pct	20	Residuals	14	0.662772	0.0473409
2016-11-16	15-30 cm	Inorganic_C_pct	20	Treatment_Level	4	0.0695368	0.0173842	0.319863	0.85998
2016-11-16	15-30 cm	Inorganic_C_pct	20	Block	1	0.0537694	0.0537694	0.989337	0.336786
2016-11-16	15-30 cm	Inorganic_C_pct	20	Residuals	14	0.760885	0.054349
2016-11-16	30-61 cm	Inorganic_C_pct	20	Treatment_Level	4	0.0942352	0.0235588	0.502995	0.734247
2016-11-16	30-61 cm	Inorganic_C_pct	20	Block	1	0.103013	0.103013	2.1994	0.160224
2016-11-16	30-61 cm	Inorganic_C_pct	20	Residuals	14	0.655719	0.046837
2016-11-16	61-91 cm	Inorganic_C_pct	20	Treatment_Level	4	0.0606639	0.015166	0.698475	0.605623
2016-11-16	61-91 cm	Inorganic_C_pct	20	Block	1	0.00811555	0.00811555	0.373765	0.550758
2016-11-16	61-91 cm	Inorganic_C_pct	20	Residuals	14	0.303982	0.021713
2016-11-16	91-120 cm	Inorganic_C_pct	20	Treatment_Level	4	0.017726	0.0044315	1.07617	0.405117
2016-11-16	91-120 cm	Inorganic_C_pct	20	Block	1	0.0189909	0.0189909	4.61185	0.049746
2016-11-16	91-120 cm	Inorganic_C_pct	20	Residuals	14	0.0576498	0.00411784
2017-11-13	0-7.6 cm	Inorganic_C_pct	19	Treatment_Level	4	0.0497883	0.0124471	0.258025	0.899572
2017-11-13	0-7.6 cm	Inorganic_C_pct	19	Block	1	0.0178525	0.0178525	0.370078	0.553443
2017-11-13	0-7.6 cm	Inorganic_C_pct	19	Residuals	13	0.627117	0.0482398
2017-11-13	7.6-15 cm	Inorganic_C_pct	20	Treatment_Level	4	0.0108953	0.00272383	0.0552276	0.993651
2017-11-13	7.6-15 cm	Inorganic_C_pct	20	Block	1	0.0364822	0.0364822	0.739703	0.404244
2017-11-13	7.6-15 cm	Inorganic_C_pct	20	Residuals	14	0.690481	0.0493201
2017-11-13	15-30 cm	Inorganic_C_pct	19	Treatment_Level	4	0.0456141	0.0114035	0.216458	0.924554
2017-11-13	15-30 cm	Inorganic_C_pct	19	Block	1	0.0280767	0.0280767	0.532945	0.478321
2017-11-13	15-30 cm	Inorganic_C_pct	19	Residuals	13	0.684869	0.0526822
2017-11-13	30-61 cm	Inorganic_C_pct	19	Treatment_Level	4	0.0536652	0.0134163	0.254332	0.901864
2017-11-13	30-61 cm	Inorganic_C_pct	19	Block	1	0.0944007	0.0944007	1.78955	0.203914
2017-11-13	30-61 cm	Inorganic_C_pct	19	Residuals	13	0.685764	0.0527511
2017-11-13	61-91 cm	Inorganic_C_pct	18	Treatment_Level	4	0.00075721	0.000189302	0.00371972	0.999968
2017-11-13	61-91 cm	Inorganic_C_pct	18	Block	1	0.0568171	0.0568171	1.11644	0.311495
2017-11-13	61-91 cm	Inorganic_C_pct	18	Residuals	12	0.610698	0.0508915
2017-11-13	91-120 cm	Inorganic_C_pct	19	Treatment_Level	4	0.0387344	0.00968359	0.439352	0.778099
2017-11-13	91-120 cm	Inorganic_C_pct	19	Block	1	0.05553	0.05553	2.51944	0.136466
2017-11-13	91-120 cm	Inorganic_C_pct	19	Residuals	13	0.286528	0.0220406
2012-02-01	0-7.6 cm	Total_C_Sand_Plus_Pom_pct	18	Treatment_Level	4	0.0311748	0.0077937	0.587534	0.677941
2012-02-01	0-7.6 cm	Total_C_Sand_Plus_Pom_pct	18	Block	1	0.0232869	0.0232869	1.7555	0.209863
2012-02-01	0-7.6 cm	Total_C_Sand_Plus_Pom_pct	18	Residuals	12	0.159181	0.0132651
2012-02-01	7.6-15 cm	Total_C_Sand_Plus_Pom_pct	20	Treatment_Level	4	0.00933322	0.00233331	0.122834	0.971909
2012-02-01	7.6-15 cm	Total_C_Sand_Plus_Pom_pct	20	Block	1	0.0161477	0.0161477	0.850076	0.372147
2012-02-01	7.6-15 cm	Total_C_Sand_Plus_Pom_pct	20	Residuals	14	0.265938	0.0189956
2012-02-01	15-30 cm	Total_C_Sand_Plus_Pom_pct	20	Treatment_Level	4	0.00812083	0.00203021	0.130621	0.968634
2012-02-01	15-30 cm	Total_C_Sand_Plus_Pom_pct	20	Block	1	0.00766941	0.00766941	0.493439	0.493912
2012-02-01	15-30 cm	Total_C_Sand_Plus_Pom_pct	20	Residuals	14	0.217599	0.0155428
2016-11-16	0-7.6 cm	Total_C_Sand_Plus_Pom_pct	20	Treatment_Level	4	0.405551	0.101388	3.54383	0.0338161
2016-11-16	0-7.6 cm	Total_C_Sand_Plus_Pom_pct	20	Block	1	0.00300521	0.00300521	0.105042	0.750653
2016-11-16	0-7.6 cm	Total_C_Sand_Plus_Pom_pct	20	Residuals	14	0.400535	0.0286097
2016-11-16	7.6-15 cm	Total_C_Sand_Plus_Pom_pct	20	Treatment_Level	4	0.299144	0.0747861	2.00939	0.148373
2016-11-16	7.6-15 cm	Total_C_Sand_Plus_Pom_pct	20	Block	1	0.0346316	0.0346316	0.930496	0.351102
2016-11-16	7.6-15 cm	Total_C_Sand_Plus_Pom_pct	20	Residuals	14	0.521057	0.0372184
2016-11-16	15-30 cm	Total_C_Sand_Plus_Pom_pct	19	Treatment_Level	4	0.0710905	0.0177726	1.47133	0.267077
2016-11-16	15-30 cm	Total_C_Sand_Plus_Pom_pct	19	Block	1	0.0546395	0.0546395	4.52341	0.0531554
2016-11-16	15-30 cm	Total_C_Sand_Plus_Pom_pct	19	Residuals	13	0.15703	0.0120793
2012-02-01	0-7.6 cm	Total_C_pct	20	Treatment_Level	4	0.0285375	0.00713439	0.19618	0.936292
2012-02-01	0-7.6 cm	Total_C_pct	20	Block	1	0.0361845	0.0361845	0.994997	0.335453
2012-02-01	0-7.6 cm	Total_C_pct	20	Residuals	14	0.50913	0.0363665
2012-02-01	7.6-15 cm	Total_C_pct	20	Treatment_Level	4	0.0051439	0.00128597	0.030015	0.998043
2012-02-01	7.6-15 cm	Total_C_pct	20	Block	1	0.0165735	0.0165735	0.386831	0.543966
2012-02-01	7.6-15 cm	Total_C_pct	20	Residuals	14	0.599821	0.0428444
2012-02-01	15-30 cm	Total_C_pct	20	Treatment_Level	4	0.0805481	0.020137	1.07726	0.404636
2012-02-01	15-30 cm	Total_C_pct	20	Block	1	0.00302964	0.00302964	0.162075	0.693333
2012-02-01	15-30 cm	Total_C_pct	20	Residuals	14	0.261699	0.0186928
2012-02-01	30-61 cm	Total_C_pct	20	Treatment_Level	4	0.039773	0.00994325	0.102353	0.979832
2012-02-01	30-61 cm	Total_C_pct	20	Block	1	0.220995	0.220995	2.27486	0.15372
2012-02-01	30-61 cm	Total_C_pct	20	Residuals	14	1.36006	0.0971468
2012-02-01	61-91 cm	Total_C_pct	20	Treatment_Level	4	0.0385063	0.00962657	0.386542	0.81472
2012-02-01	61-91 cm	Total_C_pct	20	Block	1	0.0150886	0.0150886	0.605865	0.449305
2012-02-01	61-91 cm	Total_C_pct	20	Residuals	14	0.34866	0.0249043
2012-02-01	91-120 cm	Total_C_pct	20	Treatment_Level	4	0.0133459	0.00333647	0.283167	0.884009
2012-02-01	91-120 cm	Total_C_pct	20	Block	1	0.000789719	0.000789719	0.0670237	0.799488
2012-02-01	91-120 cm	Total_C_pct	20	Residuals	14	0.164958	0.0117827
2012-11-16	0-7.6 cm	Total_C_pct	20	Treatment_Level	4	0.354531	0.0886328	1.46112	0.266297
2012-11-16	0-7.6 cm	Total_C_pct	20	Block	1	0.000275218	0.000275218	0.004537	0.94725
2012-11-16	0-7.6 cm	Total_C_pct	20	Residuals	14	0.849253	0.0606609
2012-11-16	7.6-15 cm	Total_C_pct	20	Treatment_Level	4	0.178665	0.0446663	1.03406	0.424079
2012-11-16	7.6-15 cm	Total_C_pct	20	Block	1	0.0929032	0.0929032	2.15078	0.164598
2012-11-16	7.6-15 cm	Total_C_pct	20	Residuals	14	0.604731	0.0431951
2012-11-16	15-30 cm	Total_C_pct	20	Treatment_Level	4	0.0137238	0.00343096	0.146342	0.961618
2012-11-16	15-30 cm	Total_C_pct	20	Block	1	0.0175877	0.0175877	0.750173	0.401022
2012-11-16	15-30 cm	Total_C_pct	20	Residuals	14	0.328228	0.0234448
2012-11-16	30-61 cm	Total_C_pct	20	Treatment_Level	4	0.182879	0.0457198	0.298371	0.874156
2012-11-16	30-61 cm	Total_C_pct	20	Block	1	0.239203	0.239203	1.56106	0.231996
2012-11-16	30-61 cm	Total_C_pct	20	Residuals	14	2.14524	0.153232
2012-11-16	61-91 cm	Total_C_pct	20	Treatment_Level	4	0.0480429	0.0120107	0.243229	0.909011
2012-11-16	61-91 cm	Total_C_pct	20	Block	1	0.06475	0.06475	1.31125	0.271368
2012-11-16	61-91 cm	Total_C_pct	20	Residuals	14	0.691325	0.0493803
2012-11-16	91-120 cm	Total_C_pct	20	Treatment_Level	4	0.0288069	0.00720173	0.272614	0.890749
2012-11-16	91-120 cm	Total_C_pct	20	Block	1	0.0296499	0.0296499	1.12237	0.307346
2012-11-16	91-120 cm	Total_C_pct	20	Residuals	14	0.369842	0.0264173
2013-11-08	0-7.6 cm	Total_C_pct	20	Treatment_Level	4	0.418601	0.10465	3.85398	0.0258222
2013-11-08	0-7.6 cm	Total_C_pct	20	Block	1	0.171233	0.171233	6.30604	0.0249221
2013-11-08	0-7.6 cm	Total_C_pct	20	Residuals	14	0.380153	0.0271538
2013-11-08	7.6-15 cm	Total_C_pct	20	Treatment_Level	4	0.323264	0.0808161	2.86977	0.0628127
2013-11-08	7.6-15 cm	Total_C_pct	20	Block	1	0.129727	0.129727	4.6066	0.0498595
2013-11-08	7.6-15 cm	Total_C_pct	20	Residuals	14	0.394257	0.0281612
2013-11-08	15-30 cm	Total_C_pct	20	Treatment_Level	4	0.0179973	0.00449933	0.140114	0.96446
2013-11-08	15-30 cm	Total_C_pct	20	Block	1	0.0547379	0.0547379	1.7046	0.212736
2013-11-08	15-30 cm	Total_C_pct	20	Residuals	14	0.449565	0.0321118
2013-11-08	30-61 cm	Total_C_pct	20	Treatment_Level	4	0.104857	0.0262141	0.310693	0.86606
2013-11-08	30-61 cm	Total_C_pct	20	Block	1	0.268804	0.268804	3.18591	0.0959517
2013-11-08	30-61 cm	Total_C_pct	20	Residuals	14	1.18122	0.084373
2013-11-08	61-91 cm	Total_C_pct	20	Treatment_Level	4	0.0700145	0.0175036	0.557815	0.69693
2013-11-08	61-91 cm	Total_C_pct	20	Block	1	0.0536314	0.0536314	1.70915	0.212159
2013-11-08	61-91 cm	Total_C_pct	20	Residuals	14	0.439305	0.0313789
2013-11-08	91-120 cm	Total_C_pct	20	Treatment_Level	4	0.0159215	0.00398037	0.281038	0.885376
2013-11-08	91-120 cm	Total_C_pct	20	Block	1	0.0127461	0.0127461	0.899947	0.358885
2013-11-08	91-120 cm	Total_C_pct	20	Residuals	14	0.198284	0.0141631
2015-11-24	0-7.6 cm	Total_C_pct	17	Treatment_Level	4	1.57417	0.393543	10.6039	0.000902073
2015-11-24	0-7.6 cm	Total_C_pct	17	Block	1	0.0945569	0.0945569	2.54782	0.138753
2015-11-24	0-7.6 cm	Total_C_pct	17	Residuals	11	0.408242	0.0371129
2015-11-24	7.6-15 cm	Total_C_pct	18	Treatment_Level	4	1.1103	0.277575	2.432	0.104607
2015-11-24	7.6-15 cm	Total_C_pct	18	Block	1	0.0109385	0.0109385	0.0958385	0.762192
2015-11-24	7.6-15 cm	Total_C_pct	18	Residuals	12	1.36961	0.114134
2015-11-24	15-30 cm	Total_C_pct	18	Treatment_Level	4	0.561661	0.140415	4.72501	0.0160192
2015-11-24	15-30 cm	Total_C_pct	18	Block	1	0.00224178	0.00224178	0.0754365	0.788251
2015-11-24	15-30 cm	Total_C_pct	18	Residuals	12	0.356609	0.0297175
2015-11-24	30-61 cm	Total_C_pct	20	Treatment_Level	4	0.168231	0.0420578	0.436768	0.779996
2015-11-24	30-61 cm	Total_C_pct	20	Block	1	0.514843	0.514843	5.34661	0.0364905
2015-11-24	30-61 cm	Total_C_pct	20	Residuals	14	1.34811	0.0962933
2015-11-24	61-91 cm	Total_C_pct	19	Treatment_Level	4	0.00542599	0.0013565	0.0285625	0.998208
2015-11-24	61-91 cm	Total_C_pct	19	Block	1	0.241387	0.241387	5.08266	0.0420585
2015-11-24	61-91 cm	Total_C_pct	19	Residuals	13	0.617399	0.0474922
2015-11-24	91-120 cm	Total_C_pct	19	Treatment_Level	4	0.0372736	0.0093184	0.790309	0.551885
2015-11-24	91-120 cm	Total_C_pct	19	Block	1	0.0389984	0.0389984	3.30752	0.0920673
2015-11-24	91-120 cm	Total_C_pct	19	Residuals	13	0.153281	0.0117908
2016-11-16	0-7.6 cm	Total_C_pct	20	Treatment_Level	4	0.737116	0.184279	1.2369	0.339995
2016-11-16	0-7.6 cm	Total_C_pct	20	Block	1	0.0317477	0.0317477	0.213094	0.651444
2016-11-16	0-7.6 cm	Total_C_pct	20	Residuals	14	2.08579	0.148985
2016-11-16	7.6-15 cm	Total_C_pct	20	Treatment_Level	4	0.837966	0.209491	2.10618	0.134181
2016-11-16	7.6-15 cm	Total_C_pct	20	Block	1	0.151521	0.151521	1.52336	0.23743
2016-11-16	7.6-15 cm	Total_C_pct	20	Residuals	14	1.39251	0.099465
2016-11-16	15-30 cm	Total_C_pct	20	Treatment_Level	4	0.0660389	0.0165097	0.319947	0.859924
2016-11-16	15-30 cm	Total_C_pct	20	Block	1	0.112309	0.112309	2.17648	0.162268
2016-11-16	15-30 cm	Total_C_pct	20	Residuals	14	0.722421	0.0516015
2016-11-16	30-61 cm	Total_C_pct	20	Treatment_Level	4	0.062893	0.0157232	0.184933	0.942371
2016-11-16	30-61 cm	Total_C_pct	20	Block	1	0.0811539	0.0811539	0.954514	0.345154
2016-11-16	30-61 cm	Total_C_pct	20	Residuals	14	1.1903	0.0850212
2016-11-16	61-91 cm	Total_C_pct	20	Treatment_Level	4	0.137281	0.0343202	1.10698	0.391758
2016-11-16	61-91 cm	Total_C_pct	20	Block	1	0.00823457	0.00823457	0.265601	0.614339
2016-11-16	61-91 cm	Total_C_pct	20	Residuals	14	0.434049	0.0310035
2016-11-16	91-120 cm	Total_C_pct	20	Treatment_Level	4	0.0386258	0.00965645	1.60889	0.226955
2016-11-16	91-120 cm	Total_C_pct	20	Block	1	0.0301685	0.0301685	5.02648	0.041679
2016-11-16	91-120 cm	Total_C_pct	20	Residuals	14	0.0840269	0.00600192
2017-11-13	0-7.6 cm	Total_C_pct	20	Treatment_Level	4	0.905465	0.226366	6.22253	0.00429348
2017-11-13	0-7.6 cm	Total_C_pct	20	Block	1	0.0147113	0.0147113	0.404395	0.535086
2017-11-13	0-7.6 cm	Total_C_pct	20	Residuals	14	0.509299	0.0363785
2017-11-13	7.6-15 cm	Total_C_pct	20	Treatment_Level	4	1.10488	0.27622	7.89172	0.00151166
2017-11-13	7.6-15 cm	Total_C_pct	20	Block	1	0.0175126	0.0175126	0.500343	0.490957
2017-11-13	7.6-15 cm	Total_C_pct	20	Residuals	14	0.490018	0.0350013
2017-11-13	15-30 cm	Total_C_pct	19	Treatment_Level	4	0.141141	0.0352852	1.5309	0.25071
2017-11-13	15-30 cm	Total_C_pct	19	Block	1	0.000877604	0.000877604	0.0380762	0.848307
2017-11-13	15-30 cm	Total_C_pct	19	Residuals	13	0.299632	0.0230486
2017-11-13	30-61 cm	Total_C_pct	20	Treatment_Level	4	0.176038	0.0440094	0.287035	0.881518
2017-11-13	30-61 cm	Total_C_pct	20	Block	1	0.13643	0.13643	0.889816	0.361522
2017-11-13	30-61 cm	Total_C_pct	20	Residuals	14	2.14654	0.153324
2017-11-13	61-91 cm	Total_C_pct	18	Treatment_Level	4	0.00884682	0.00221171	0.0340135	0.997458
2017-11-13	61-91 cm	Total_C_pct	18	Block	1	0.115149	0.115149	1.77086	0.20801
2017-11-13	61-91 cm	Total_C_pct	18	Residuals	12	0.780291	0.0650243
2017-11-13	91-120 cm	Total_C_pct	19	Treatment_Level	4	0.0277968	0.00694921	0.393851	0.80947
2017-11-13	91-120 cm	Total_C_pct	19	Block	1	0.0545117	0.0545117	3.08948	0.102306
2017-11-13	91-120 cm	Total_C_pct	19	Residuals	13	0.229375	0.0176443
2012-02-01	0-7.6 cm	Total_N_pct	20	Treatment_Level	4	0.000323205	8.08012e-05	1.69071	0.207859
2012-02-01	0-7.6 cm	Total_N_pct	20	Block	1	7.67964e-07	7.67964e-07	0.0160691	0.90093
2012-02-01	0-7.6 cm	Total_N_pct	20	Residuals	14	0.00066908	4.77914e-05
2012-02-01	7.6-15 cm	Total_N_pct	20	Treatment_Level	4	0.000236725	5.91812e-05	0.991274	0.444195
2012-02-01	7.6-15 cm	Total_N_pct	20	Block	1	4.73235e-05	4.73235e-05	0.792661	0.388341
2012-02-01	7.6-15 cm	Total_N_pct	20	Residuals	14	0.00083583	5.97021e-05
2012-02-01	15-30 cm	Total_N_pct	20	Treatment_Level	4	0.000273554	6.83884e-05	0.462202	0.762381
2012-02-01	15-30 cm	Total_N_pct	20	Block	1	0.000179064	0.000179064	1.2102	0.289849
2012-02-01	15-30 cm	Total_N_pct	20	Residuals	14	0.00207147	0.000147962
2012-02-01	30-61 cm	Total_N_pct	20	Treatment_Level	4	0.000247745	6.19363e-05	0.505416	0.732586
2012-02-01	30-61 cm	Total_N_pct	20	Block	1	0.000191595	0.000191595	1.56347	0.231655
2012-02-01	30-61 cm	Total_N_pct	20	Residuals	14	0.00171563	0.000122545
2012-02-01	61-91 cm	Total_N_pct	20	Treatment_Level	4	0.000167312	4.18279e-05	0.659034	0.630447
2012-02-01	61-91 cm	Total_N_pct	20	Block	1	0.000314016	0.000314016	4.94759	0.0430879
2012-02-01	61-91 cm	Total_N_pct	20	Residuals	14	0.00088856	6.34686e-05
2012-02-01	91-120 cm	Total_N_pct	20	Treatment_Level	4	9.47503e-05	2.36876e-05	0.475158	0.753424
2012-02-01	91-120 cm	Total_N_pct	20	Block	1	0.000418565	0.000418565	8.39616	0.0116971
2012-02-01	91-120 cm	Total_N_pct	20	Residuals	14	0.000697928	4.9852e-05
2012-11-16	0-7.6 cm	Total_N_pct	20	Treatment_Level	4	0.00484468	0.00121117	7.65339	0.00173903
2012-11-16	0-7.6 cm	Total_N_pct	20	Block	1	0.000695574	0.000695574	4.39534	0.0546853
2012-11-16	0-7.6 cm	Total_N_pct	20	Residuals	14	0.00221554	0.000158253
2012-11-16	7.6-15 cm	Total_N_pct	20	Treatment_Level	4	0.00258983	0.000647457	4.20772	0.0191939
2012-11-16	7.6-15 cm	Total_N_pct	20	Block	1	0.000174981	0.000174981	1.13718	0.304295
2012-11-16	7.6-15 cm	Total_N_pct	20	Residuals	14	0.00215423	0.000153874
2012-11-16	15-30 cm	Total_N_pct	20	Treatment_Level	4	0.000199078	4.97696e-05	0.295483	0.876039
2012-11-16	15-30 cm	Total_N_pct	20	Block	1	7.05004e-05	7.05004e-05	0.418563	0.528121
2012-11-16	15-30 cm	Total_N_pct	20	Residuals	14	0.00235808	0.000168434
2012-11-16	30-61 cm	Total_N_pct	20	Treatment_Level	4	0.000383174	9.57934e-05	0.422725	0.789724
2012-11-16	30-61 cm	Total_N_pct	20	Block	1	0.000251675	0.000251675	1.11061	0.309798
2012-11-16	30-61 cm	Total_N_pct	20	Residuals	14	0.00317253	0.000226609
2012-11-16	61-91 cm	Total_N_pct	20	Treatment_Level	4	4.50818e-05	1.12704e-05	0.191748	0.938711
2012-11-16	61-91 cm	Total_N_pct	20	Block	1	0.000337096	0.000337096	5.73514	0.031177
2012-11-16	61-91 cm	Total_N_pct	20	Residuals	14	0.000822883	5.87774e-05
2012-11-16	91-120 cm	Total_N_pct	20	Treatment_Level	4	0.000140016	3.50041e-05	0.582967	0.680077
2012-11-16	91-120 cm	Total_N_pct	20	Block	1	0.000382155	0.000382155	6.3645	0.0243685
2012-11-16	91-120 cm	Total_N_pct	20	Residuals	14	0.000840626	6.00447e-05
2013-11-08	0-7.6 cm	Total_N_pct	20	Treatment_Level	4	0.00468906	0.00117227	9.98795	0.000489885
2013-11-08	0-7.6 cm	Total_N_pct	20	Block	1	0.00103616	0.00103616	8.82826	0.0101116
2013-11-08	0-7.6 cm	Total_N_pct	20	Residuals	14	0.00164315	0.000117368
2013-11-08	7.6-15 cm	Total_N_pct	20	Treatment_Level	4	0.00361197	0.000902993	7.33244	0.00210947
2013-11-08	7.6-15 cm	Total_N_pct	20	Block	1	0.000860867	0.000860867	6.99037	0.0192559
2013-11-08	7.6-15 cm	Total_N_pct	20	Residuals	14	0.00172411	0.00012315
2013-11-08	15-30 cm	Total_N_pct	20	Treatment_Level	4	0.000121727	3.04318e-05	0.471884	0.755685
2013-11-08	15-30 cm	Total_N_pct	20	Block	1	0.000442713	0.000442713	6.86483	0.0201727
2013-11-08	15-30 cm	Total_N_pct	20	Residuals	14	0.000902859	6.44899e-05
2013-11-08	30-61 cm	Total_N_pct	20	Treatment_Level	4	0.000174001	4.35003e-05	0.336445	0.848876
2013-11-08	30-61 cm	Total_N_pct	20	Block	1	0.000167903	0.000167903	1.29862	0.273589
2013-11-08	30-61 cm	Total_N_pct	20	Residuals	14	0.00181011	0.000129294
2013-11-08	61-91 cm	Total_N_pct	20	Treatment_Level	4	6.50522e-05	1.6263e-05	0.980934	0.449187
2013-11-08	61-91 cm	Total_N_pct	20	Block	1	0.000527585	0.000527585	31.8222	6.08653e-05
2013-11-08	61-91 cm	Total_N_pct	20	Residuals	14	0.000232108	1.65791e-05
2013-11-08	91-120 cm	Total_N_pct	20	Treatment_Level	4	2.47706e-05	6.19265e-06	0.278141	0.88723
2013-11-08	91-120 cm	Total_N_pct	20	Block	1	0.000606642	0.000606642	27.2472	0.000129784
2013-11-08	91-120 cm	Total_N_pct	20	Residuals	14	0.000311702	2.22644e-05
2015-11-24	0-7.6 cm	Total_N_pct	17	Treatment_Level	4	0.0127658	0.00319146	5.74738	0.00953252
2015-11-24	0-7.6 cm	Total_N_pct	17	Block	1	0.00199822	0.00199822	3.59852	0.0843811
2015-11-24	0-7.6 cm	Total_N_pct	17	Residuals	11	0.00610819	0.00055529
2015-11-24	7.6-15 cm	Total_N_pct	19	Treatment_Level	4	0.00708075	0.00177019	4.97052	0.0118376
2015-11-24	7.6-15 cm	Total_N_pct	19	Block	1	0.00123623	0.00123623	3.47122	0.0851899
2015-11-24	7.6-15 cm	Total_N_pct	19	Residuals	13	0.00462979	0.000356138
2015-11-24	15-30 cm	Total_N_pct	20	Treatment_Level	4	0.00464471	0.00116118	3.64034	0.031063
2015-11-24	15-30 cm	Total_N_pct	20	Block	1	0.00195964	0.00195964	6.14355	0.0265397
2015-11-24	15-30 cm	Total_N_pct	20	Residuals	14	0.00446565	0.000318975
2015-11-24	30-61 cm	Total_N_pct	19	Treatment_Level	4	0.000136796	3.4199e-05	0.171501	0.949105
2015-11-24	30-61 cm	Total_N_pct	19	Block	1	0.000683755	0.000683755	3.42889	0.0869066
2015-11-24	30-61 cm	Total_N_pct	19	Residuals	13	0.00259233	0.00019941
2015-11-24	61-91 cm	Total_N_pct	19	Treatment_Level	4	0.000110136	2.75341e-05	1.19559	0.3587
2015-11-24	61-91 cm	Total_N_pct	19	Block	1	4.67276e-05	4.67276e-05	2.02902	0.177881
2015-11-24	61-91 cm	Total_N_pct	19	Residuals	13	0.000299385	2.30296e-05
2015-11-24	91-120 cm	Total_N_pct	20	Treatment_Level	4	0.000128275	3.20688e-05	1.05327	0.415326
2015-11-24	91-120 cm	Total_N_pct	20	Block	1	8.17341e-06	8.17341e-06	0.268449	0.612465
2015-11-24	91-120 cm	Total_N_pct	20	Residuals	14	0.000426256	3.04468e-05
2016-11-16	0-7.6 cm	Total_N_pct	20	Treatment_Level	4	0.00780699	0.00195175	4.15545	0.0200397
2016-11-16	0-7.6 cm	Total_N_pct	20	Block	1	0.000516076	0.000516076	1.09877	0.312295
2016-11-16	0-7.6 cm	Total_N_pct	20	Residuals	14	0.00657557	0.000469683
2016-11-16	7.6-15 cm	Total_N_pct	20	Treatment_Level	4	0.00859175	0.00214794	8.13761	0.00131188
2016-11-16	7.6-15 cm	Total_N_pct	20	Block	1	5.06913e-07	5.06913e-07	0.00192048	0.965664
2016-11-16	7.6-15 cm	Total_N_pct	20	Residuals	14	0.00369533	0.000263952
2016-11-16	15-30 cm	Total_N_pct	20	Treatment_Level	4	0.00193874	0.000484685	1.2366	0.340107
2016-11-16	15-30 cm	Total_N_pct	20	Block	1	1.54005e-06	1.54005e-06	0.00392918	0.950905
2016-11-16	15-30 cm	Total_N_pct	20	Residuals	14	0.00548731	0.000391951
2016-11-16	30-61 cm	Total_N_pct	20	Treatment_Level	4	0.000203025	5.07564e-05	0.452804	0.768887
2016-11-16	30-61 cm	Total_N_pct	20	Block	1	0.000165919	0.000165919	1.48019	0.243859
2016-11-16	30-61 cm	Total_N_pct	20	Residuals	14	0.00156931	0.000112093
2016-11-16	61-91 cm	Total_N_pct	20	Treatment_Level	4	0.000152265	3.80663e-05	0.94119	0.468855
2016-11-16	61-91 cm	Total_N_pct	20	Block	1	2.73957e-07	2.73957e-07	0.00677358	0.935572
2016-11-16	61-91 cm	Total_N_pct	20	Residuals	14	0.000566228	4.04449e-05
2016-11-16	91-120 cm	Total_N_pct	20	Treatment_Level	4	7.52698e-05	1.88174e-05	2.1855	0.123656
2016-11-16	91-120 cm	Total_N_pct	20	Block	1	0.000157338	0.000157338	18.2735	0.000770284
2016-11-16	91-120 cm	Total_N_pct	20	Residuals	14	0.000120542	8.61014e-06
2017-11-13	0-7.6 cm	Total_N_pct	20	Treatment_Level	4	0.0104396	0.00260989	29.1973	1.16754e-06
2017-11-13	0-7.6 cm	Total_N_pct	20	Block	1	0.000217293	0.000217293	2.43089	0.141279
2017-11-13	0-7.6 cm	Total_N_pct	20	Residuals	14	0.00125143	8.93882e-05
2017-11-13	7.6-15 cm	Total_N_pct	19	Treatment_Level	4	0.00965073	0.00241268	20.8313	1.47015e-05
2017-11-13	7.6-15 cm	Total_N_pct	19	Block	1	0.000110427	0.000110427	0.953436	0.346667
2017-11-13	7.6-15 cm	Total_N_pct	19	Residuals	13	0.00150566	0.00011582
2017-11-13	15-30 cm	Total_N_pct	20	Treatment_Level	4	0.00056029	0.000140072	1.71296	0.202965
2017-11-13	15-30 cm	Total_N_pct	20	Block	1	0.000289915	0.000289915	3.5454	0.0806569
2017-11-13	15-30 cm	Total_N_pct	20	Residuals	14	0.00114481	8.17721e-05
2017-11-13	30-61 cm	Total_N_pct	20	Treatment_Level	4	0.000264366	6.60915e-05	0.417825	0.793117
2017-11-13	30-61 cm	Total_N_pct	20	Block	1	0.000267865	0.000267865	1.69342	0.21416
2017-11-13	30-61 cm	Total_N_pct	20	Residuals	14	0.00221452	0.00015818
2017-11-13	61-91 cm	Total_N_pct	19	Treatment_Level	4	3.48807e-05	8.72019e-06	0.319056	0.860192
2017-11-13	61-91 cm	Total_N_pct	19	Block	1	0.000105054	0.000105054	3.84372	0.0717195
2017-11-13	61-91 cm	Total_N_pct	19	Residuals	13	0.000355306	2.73312e-05
2017-11-13	91-120 cm	Total_N_pct	19	Treatment_Level	4	2.43472e-05	6.0868e-06	0.210275	0.928101
2017-11-13	91-120 cm	Total_N_pct	19	Block	1	0.00014513	0.00014513	5.01367	0.0432672
2017-11-13	91-120 cm	Total_N_pct	19	Residuals	13	0.00037631	2.89469e-05

## Sheet: Group LSD
Response_Variable	Sampling_Date	Depth_Segment	Treatment_Level	Response_Mean	Alpha_0.05	Alpha_0.10	Alpha_0.15	Column1
EquivSeg_Ammonium_N_kg_per_ha	2012-02-01	0-7.6 cm	SU	4.69995	a	a	a
EquivSeg_Ammonium_N_kg_per_ha	2012-02-01	0-7.6 cm	DM	4.47719	a	a	a
EquivSeg_Ammonium_N_kg_per_ha	2012-02-01	0-7.6 cm	Urea	4.22823	a	a	a
EquivSeg_Ammonium_N_kg_per_ha	2012-02-01	0-7.6 cm	DM + A	3.76224	a	a	a
EquivSeg_Ammonium_N_kg_per_ha	2012-02-01	0-7.6 cm	Control	3.43691	a	a	a
EquivSeg_Ammonium_N_kg_per_ha	2012-02-01	7.6-15 cm	DM	5.38218	a	a	a
EquivSeg_Ammonium_N_kg_per_ha	2012-02-01	7.6-15 cm	SU	5.12435	a	a	a
EquivSeg_Ammonium_N_kg_per_ha	2012-02-01	7.6-15 cm	Urea	4.35528	a	a	a
EquivSeg_Ammonium_N_kg_per_ha	2012-02-01	7.6-15 cm	Control	4.21412	a	a	a
EquivSeg_Ammonium_N_kg_per_ha	2012-02-01	7.6-15 cm	DM + A	4.07319	a	a	a
EquivSeg_Ammonium_N_kg_per_ha	2012-02-01	15-30 cm	DM	10.7095	a	a	a
EquivSeg_Ammonium_N_kg_per_ha	2012-02-01	15-30 cm	SU	10.4762	a	a	a
EquivSeg_Ammonium_N_kg_per_ha	2012-02-01	15-30 cm	DM + A	9.52733	a	a	a
EquivSeg_Ammonium_N_kg_per_ha	2012-02-01	15-30 cm	Urea	9.22869	a	a	a
EquivSeg_Ammonium_N_kg_per_ha	2012-02-01	15-30 cm	Control	9.18602	a	a	a
EquivSeg_Ammonium_N_kg_per_ha	2012-02-01	30-61 cm	DM	18.219	a	a	a
EquivSeg_Ammonium_N_kg_per_ha	2012-02-01	30-61 cm	SU	15.9527	a	a	a
EquivSeg_Ammonium_N_kg_per_ha	2012-02-01	30-61 cm	Control	15.4092	a	a	a
EquivSeg_Ammonium_N_kg_per_ha	2012-02-01	30-61 cm	DM + A	14.1375	a	a	a
EquivSeg_Ammonium_N_kg_per_ha	2012-02-01	30-61 cm	Urea	13.077	a	a	a
EquivSeg_Ammonium_N_kg_per_ha	2012-02-01	61-91 cm	SU	15.9721	a	a	a
EquivSeg_Ammonium_N_kg_per_ha	2012-02-01	61-91 cm	Control	15.5473	a	a	a
EquivSeg_Ammonium_N_kg_per_ha	2012-02-01	61-91 cm	DM	15.3939	a	a	a
EquivSeg_Ammonium_N_kg_per_ha	2012-02-01	61-91 cm	DM + A	14.8593	a	a	a
EquivSeg_Ammonium_N_kg_per_ha	2012-02-01	61-91 cm	Urea	13.0078	a	a	a
EquivSeg_Ammonium_N_kg_per_ha	2012-02-01	91-120 cm	SU	17.196	a	a	a
EquivSeg_Ammonium_N_kg_per_ha	2012-02-01	91-120 cm	Urea	15.7412	a	a	a
EquivSeg_Ammonium_N_kg_per_ha	2012-02-01	91-120 cm	Control	15.6096	a	a	a
EquivSeg_Ammonium_N_kg_per_ha	2012-02-01	91-120 cm	DM + A	15.5277	a	a	a
EquivSeg_Ammonium_N_kg_per_ha	2012-02-01	91-120 cm	DM	15.4845	a	a	a
EquivSeg_Ammonium_N_kg_per_ha	2012-02-01	120-150 cm	Control	17.0105	a	a	a
EquivSeg_Ammonium_N_kg_per_ha	2012-02-01	120-150 cm	DM + A	16.991	a	a	a
EquivSeg_Ammonium_N_kg_per_ha	2012-02-01	120-150 cm	DM	15.9813	a	a	a
EquivSeg_Ammonium_N_kg_per_ha	2012-02-01	120-150 cm	SU	15.7933	a	a	a
EquivSeg_Ammonium_N_kg_per_ha	2012-02-01	120-150 cm	Urea	15.7641	a	a	a
EquivSeg_Ammonium_N_kg_per_ha	2012-02-01	150-180 cm	Control	23.9971	a	a	a
EquivSeg_Ammonium_N_kg_per_ha	2012-02-01	150-180 cm	DM + A	21.0644	a	a	a
EquivSeg_Ammonium_N_kg_per_ha	2012-02-01	150-180 cm	DM	20.2115	a	a	a
EquivSeg_Ammonium_N_kg_per_ha	2012-02-01	150-180 cm	SU	20.0509	a	a	a
EquivSeg_Ammonium_N_kg_per_ha	2012-02-01	150-180 cm	Urea	17.3792	a	a	a
EquivSeg_Ammonium_N_kg_per_ha	2012-11-16	0-7.6 cm	DM + A	9.76692	a	a	a
EquivSeg_Ammonium_N_kg_per_ha	2012-11-16	0-7.6 cm	DM	8.12916	a	a	ab
EquivSeg_Ammonium_N_kg_per_ha	2012-11-16	0-7.6 cm	Control	7.32481	a	a	ab
EquivSeg_Ammonium_N_kg_per_ha	2012-11-16	0-7.6 cm	Urea	6.72756	a	a	ab
EquivSeg_Ammonium_N_kg_per_ha	2012-11-16	0-7.6 cm	SU	6.28714	a	a	b
EquivSeg_Ammonium_N_kg_per_ha	2012-11-16	7.6-15 cm	Control	8.35903	a	a	a
EquivSeg_Ammonium_N_kg_per_ha	2012-11-16	7.6-15 cm	DM + A	8.34955	a	a	a
EquivSeg_Ammonium_N_kg_per_ha	2012-11-16	7.6-15 cm	DM	8.15669	a	a	a
EquivSeg_Ammonium_N_kg_per_ha	2012-11-16	7.6-15 cm	SU	7.85873	a	a	a
EquivSeg_Ammonium_N_kg_per_ha	2012-11-16	7.6-15 cm	Urea	6.62044	a	a	a
EquivSeg_Ammonium_N_kg_per_ha	2012-11-16	15-30 cm	Control	17.0311	a	a	a
EquivSeg_Ammonium_N_kg_per_ha	2012-11-16	15-30 cm	DM	15.1809	a	a	a
EquivSeg_Ammonium_N_kg_per_ha	2012-11-16	15-30 cm	SU	14.5318	a	a	a
EquivSeg_Ammonium_N_kg_per_ha	2012-11-16	15-30 cm	DM + A	12.6218	a	a	a
EquivSeg_Ammonium_N_kg_per_ha	2012-11-16	15-30 cm	Urea	11.5872	a	a	a
EquivSeg_Ammonium_N_kg_per_ha	2012-11-16	30-61 cm	Control	51.1945	a	a	a
EquivSeg_Ammonium_N_kg_per_ha	2012-11-16	30-61 cm	DM	45.3315	a	a	a
EquivSeg_Ammonium_N_kg_per_ha	2012-11-16	30-61 cm	SU	44.7201	a	a	a
EquivSeg_Ammonium_N_kg_per_ha	2012-11-16	30-61 cm	DM + A	42.2743	a	a	a
EquivSeg_Ammonium_N_kg_per_ha	2012-11-16	30-61 cm	Urea	28.0402	a	a	a
EquivSeg_Ammonium_N_kg_per_ha	2012-11-16	61-91 cm	SU	40.5501	a	a	a
EquivSeg_Ammonium_N_kg_per_ha	2012-11-16	61-91 cm	Urea	38.1533	a	a	a
EquivSeg_Ammonium_N_kg_per_ha	2012-11-16	61-91 cm	Control	37.8775	a	a	a
EquivSeg_Ammonium_N_kg_per_ha	2012-11-16	61-91 cm	DM	36.6448	a	a	a
EquivSeg_Ammonium_N_kg_per_ha	2012-11-16	61-91 cm	DM + A	36.1442	a	a	a
EquivSeg_Ammonium_N_kg_per_ha	2012-11-16	91-120 cm	Urea	37.9004	a	a	a
EquivSeg_Ammonium_N_kg_per_ha	2012-11-16	91-120 cm	SU	33.5257	a	a	a
EquivSeg_Ammonium_N_kg_per_ha	2012-11-16	91-120 cm	DM + A	33.1049	a	a	a
EquivSeg_Ammonium_N_kg_per_ha	2012-11-16	91-120 cm	Control	31.0034	a	a	a
EquivSeg_Ammonium_N_kg_per_ha	2012-11-16	91-120 cm	DM	27.1396	a	a	a
EquivSeg_Ammonium_N_kg_per_ha	2012-11-16	120-150 cm	Urea	42.282	a	a	a
EquivSeg_Ammonium_N_kg_per_ha	2012-11-16	120-150 cm	SU	39.4923	a	a	a
EquivSeg_Ammonium_N_kg_per_ha	2012-11-16	120-150 cm	Control	37.591	a	a	a
EquivSeg_Ammonium_N_kg_per_ha	2012-11-16	120-150 cm	DM	35.3406	a	a	a
EquivSeg_Ammonium_N_kg_per_ha	2012-11-16	120-150 cm	DM + A	34.1596	a	a	a
EquivSeg_Ammonium_N_kg_per_ha	2012-11-16	150-180 cm	DM	53.8898	a	a	a
EquivSeg_Ammonium_N_kg_per_ha	2012-11-16	150-180 cm	Urea	49.1974	a	a	a
EquivSeg_Ammonium_N_kg_per_ha	2012-11-16	150-180 cm	Control	44.1947	a	a	a
EquivSeg_Ammonium_N_kg_per_ha	2012-11-16	150-180 cm	SU	41.5431	a	a	a
EquivSeg_Ammonium_N_kg_per_ha	2012-11-16	150-180 cm	DM + A	34.4619	a	a	a
EquivSeg_Ammonium_N_kg_per_ha	2013-11-08	0-7.6 cm	Urea	6.8791	a	a	a
EquivSeg_Ammonium_N_kg_per_ha	2013-11-08	0-7.6 cm	DM	5.48774	a	a	ab
EquivSeg_Ammonium_N_kg_per_ha	2013-11-08	0-7.6 cm	DM + A	5.18073	a	a	ab
EquivSeg_Ammonium_N_kg_per_ha	2013-11-08	0-7.6 cm	SU	4.96095	a	a	ab
EquivSeg_Ammonium_N_kg_per_ha	2013-11-08	0-7.6 cm	Control	4.24627	a	a	b
EquivSeg_Ammonium_N_kg_per_ha	2013-11-08	7.6-15 cm	Urea	5.91322	a	a	a
EquivSeg_Ammonium_N_kg_per_ha	2013-11-08	7.6-15 cm	Control	5.4322	a	a	a
EquivSeg_Ammonium_N_kg_per_ha	2013-11-08	7.6-15 cm	DM + A	5.20988	a	a	a
EquivSeg_Ammonium_N_kg_per_ha	2013-11-08	7.6-15 cm	DM	5.04518	a	a	a
EquivSeg_Ammonium_N_kg_per_ha	2013-11-08	7.6-15 cm	SU	4.85866	a	a	a
EquivSeg_Ammonium_N_kg_per_ha	2013-11-08	15-30 cm	DM	12.3408	a	a	a
EquivSeg_Ammonium_N_kg_per_ha	2013-11-08	15-30 cm	Control	11.7315	a	a	a
EquivSeg_Ammonium_N_kg_per_ha	2013-11-08	15-30 cm	Urea	11.5425	a	a	a
EquivSeg_Ammonium_N_kg_per_ha	2013-11-08	15-30 cm	SU	11.2208	a	a	a
EquivSeg_Ammonium_N_kg_per_ha	2013-11-08	15-30 cm	DM + A	10.8058	a	a	a
EquivSeg_Ammonium_N_kg_per_ha	2013-11-08	30-61 cm	DM + A	17.4284	a	a	a
EquivSeg_Ammonium_N_kg_per_ha	2013-11-08	30-61 cm	DM	17.2016	a	a	a
EquivSeg_Ammonium_N_kg_per_ha	2013-11-08	30-61 cm	Control	16.9396	a	a	a
EquivSeg_Ammonium_N_kg_per_ha	2013-11-08	30-61 cm	Urea	15.8877	a	a	a
EquivSeg_Ammonium_N_kg_per_ha	2013-11-08	30-61 cm	SU	15.5352	a	a	a
EquivSeg_Ammonium_N_kg_per_ha	2013-11-08	61-91 cm	Urea	18.9056	a	a	a
EquivSeg_Ammonium_N_kg_per_ha	2013-11-08	61-91 cm	Control	18.0982	a	a	a
EquivSeg_Ammonium_N_kg_per_ha	2013-11-08	61-91 cm	DM	17.083	a	a	a
EquivSeg_Ammonium_N_kg_per_ha	2013-11-08	61-91 cm	DM + A	15.63	a	a	a
EquivSeg_Ammonium_N_kg_per_ha	2013-11-08	61-91 cm	SU	15.2041	a	a	a
EquivSeg_Ammonium_N_kg_per_ha	2013-11-08	91-120 cm	Urea	17.4868	a	a	a
EquivSeg_Ammonium_N_kg_per_ha	2013-11-08	91-120 cm	DM + A	15.5862	a	a	a
EquivSeg_Ammonium_N_kg_per_ha	2013-11-08	91-120 cm	DM	14.6919	a	a	a
EquivSeg_Ammonium_N_kg_per_ha	2013-11-08	91-120 cm	Control	14.2828	a	a	a
EquivSeg_Ammonium_N_kg_per_ha	2013-11-08	91-120 cm	SU	13.762	a	a	a
EquivSeg_Ammonium_N_kg_per_ha	2013-11-08	120-150 cm	Control	18.9062	a	a	a
EquivSeg_Ammonium_N_kg_per_ha	2013-11-08	120-150 cm	SU	18.6888	a	a	a
EquivSeg_Ammonium_N_kg_per_ha	2013-11-08	120-150 cm	Urea	18.004	a	a	a
EquivSeg_Ammonium_N_kg_per_ha	2013-11-08	120-150 cm	DM	17.635	a	a	a
EquivSeg_Ammonium_N_kg_per_ha	2013-11-08	120-150 cm	DM + A	16.8616	a	a	a
EquivSeg_Ammonium_N_kg_per_ha	2013-11-08	150-180 cm	DM	21.3062	a	a	a
EquivSeg_Ammonium_N_kg_per_ha	2013-11-08	150-180 cm	SU	20.4699	a	a	a
EquivSeg_Ammonium_N_kg_per_ha	2013-11-08	150-180 cm	Urea	19.9701	a	a	a
EquivSeg_Ammonium_N_kg_per_ha	2013-11-08	150-180 cm	DM + A	19.8691	a	a	a
EquivSeg_Ammonium_N_kg_per_ha	2013-11-08	150-180 cm	Control	19.7712	a	a	a
EquivSeg_Ammonium_N_kg_per_ha	2015-11-24	0-7.6 cm	DM + A	9.63835	a	a	a
EquivSeg_Ammonium_N_kg_per_ha	2015-11-24	0-7.6 cm	SU	9.47622	a	a	a
EquivSeg_Ammonium_N_kg_per_ha	2015-11-24	0-7.6 cm	Control	8.74636	a	a	a
EquivSeg_Ammonium_N_kg_per_ha	2015-11-24	0-7.6 cm	Urea	8.40697	a	a	a
EquivSeg_Ammonium_N_kg_per_ha	2015-11-24	0-7.6 cm	DM	7.93759	a	a	a
EquivSeg_Ammonium_N_kg_per_ha	2015-11-24	7.6-15 cm	SU	9.51318	a	a	a
EquivSeg_Ammonium_N_kg_per_ha	2015-11-24	7.6-15 cm	DM + A	9.20838	a	a	a
EquivSeg_Ammonium_N_kg_per_ha	2015-11-24	7.6-15 cm	Control	9.20237	a	a	a
EquivSeg_Ammonium_N_kg_per_ha	2015-11-24	7.6-15 cm	Urea	9.1492	a	a	a
EquivSeg_Ammonium_N_kg_per_ha	2015-11-24	7.6-15 cm	DM	8.89301	a	a	a
EquivSeg_Ammonium_N_kg_per_ha	2015-11-24	15-30 cm	Control	17.5423	a	a	a
EquivSeg_Ammonium_N_kg_per_ha	2015-11-24	15-30 cm	Urea	15.632	a	a	a
EquivSeg_Ammonium_N_kg_per_ha	2015-11-24	15-30 cm	SU	15.2166	a	a	a
EquivSeg_Ammonium_N_kg_per_ha	2015-11-24	15-30 cm	DM + A	15.1288	a	a	a
EquivSeg_Ammonium_N_kg_per_ha	2015-11-24	15-30 cm	DM	14.8687	a	a	a
EquivSeg_Ammonium_N_kg_per_ha	2015-11-24	30-61 cm	Control	34.1405	a	a	a
EquivSeg_Ammonium_N_kg_per_ha	2015-11-24	30-61 cm	Urea	31.1527	a	a	a
EquivSeg_Ammonium_N_kg_per_ha	2015-11-24	30-61 cm	DM	26.9097	a	a	a
EquivSeg_Ammonium_N_kg_per_ha	2015-11-24	30-61 cm	SU	25.0156	a	a	a
EquivSeg_Ammonium_N_kg_per_ha	2015-11-24	30-61 cm	DM + A	21.532	a	a	a
EquivSeg_Ammonium_N_kg_per_ha	2015-11-24	61-91 cm	DM	43.0949	a	a	a
EquivSeg_Ammonium_N_kg_per_ha	2015-11-24	61-91 cm	Urea	36.1659	a	a	a
EquivSeg_Ammonium_N_kg_per_ha	2015-11-24	61-91 cm	Control	30.4662	a	a	a
EquivSeg_Ammonium_N_kg_per_ha	2015-11-24	61-91 cm	SU	30.4511	a	a	a
EquivSeg_Ammonium_N_kg_per_ha	2015-11-24	61-91 cm	DM + A	28.8971	a	a	a
EquivSeg_Ammonium_N_kg_per_ha	2015-11-24	91-120 cm	Control	31.3337	a	a	a
EquivSeg_Ammonium_N_kg_per_ha	2015-11-24	91-120 cm	Urea	27.1855	a	a	a
EquivSeg_Ammonium_N_kg_per_ha	2015-11-24	91-120 cm	DM	26.2469	a	a	a
EquivSeg_Ammonium_N_kg_per_ha	2015-11-24	91-120 cm	DM + A	25.5824	a	a	a
EquivSeg_Ammonium_N_kg_per_ha	2015-11-24	91-120 cm	SU	19.429	a	a	a
EquivSeg_Ammonium_N_kg_per_ha	2016-11-16	0-7.6 cm	SU	12.573	a	a	a
EquivSeg_Ammonium_N_kg_per_ha	2016-11-16	0-7.6 cm	DM	12.2595	a	a	a
EquivSeg_Ammonium_N_kg_per_ha	2016-11-16	0-7.6 cm	Urea	11.4582	a	a	a
EquivSeg_Ammonium_N_kg_per_ha	2016-11-16	0-7.6 cm	Control	9.02047	a	a	a
EquivSeg_Ammonium_N_kg_per_ha	2016-11-16	0-7.6 cm	DM + A	8.86022	a	a	a
EquivSeg_Ammonium_N_kg_per_ha	2016-11-16	7.6-15 cm	DM	12.3346	a	a	a
EquivSeg_Ammonium_N_kg_per_ha	2016-11-16	7.6-15 cm	SU	11.0652	a	a	a
EquivSeg_Ammonium_N_kg_per_ha	2016-11-16	7.6-15 cm	Control	10.8674	a	a	a
EquivSeg_Ammonium_N_kg_per_ha	2016-11-16	7.6-15 cm	DM + A	9.93318	a	a	a
EquivSeg_Ammonium_N_kg_per_ha	2016-11-16	7.6-15 cm	Urea	9.85248	a	a	a
EquivSeg_Ammonium_N_kg_per_ha	2016-11-16	15-30 cm	SU	21.8023	a	a	a
EquivSeg_Ammonium_N_kg_per_ha	2016-11-16	15-30 cm	DM + A	18.1397	a	a	a
EquivSeg_Ammonium_N_kg_per_ha	2016-11-16	15-30 cm	Urea	16.433	a	a	a
EquivSeg_Ammonium_N_kg_per_ha	2016-11-16	15-30 cm	DM	15.3745	a	a	a
EquivSeg_Ammonium_N_kg_per_ha	2016-11-16	15-30 cm	Control	13.852	a	a	a
EquivSeg_Ammonium_N_kg_per_ha	2016-11-16	30-61 cm	DM + A	28.7249	a	a	a
EquivSeg_Ammonium_N_kg_per_ha	2016-11-16	30-61 cm	DM	26.1158	a	a	a
EquivSeg_Ammonium_N_kg_per_ha	2016-11-16	30-61 cm	SU	24.5238	a	a	a
EquivSeg_Ammonium_N_kg_per_ha	2016-11-16	30-61 cm	Urea	24.2072	a	a	a
EquivSeg_Ammonium_N_kg_per_ha	2016-11-16	30-61 cm	Control	20.6246	a	a	a
EquivSeg_Ammonium_N_kg_per_ha	2016-11-16	61-91 cm	SU	26.3071	a	a	a
EquivSeg_Ammonium_N_kg_per_ha	2016-11-16	61-91 cm	DM	24.5701	a	a	a
EquivSeg_Ammonium_N_kg_per_ha	2016-11-16	61-91 cm	Control	23.2574	a	a	a
EquivSeg_Ammonium_N_kg_per_ha	2016-11-16	61-91 cm	DM + A	19.3259	a	a	a
EquivSeg_Ammonium_N_kg_per_ha	2016-11-16	61-91 cm	Urea	16.9741	a	a	a
EquivSeg_Ammonium_N_kg_per_ha	2016-11-16	91-120 cm	DM	26.5132	a	a	a
EquivSeg_Ammonium_N_kg_per_ha	2016-11-16	91-120 cm	Control	23.8499	a	a	a
EquivSeg_Ammonium_N_kg_per_ha	2016-11-16	91-120 cm	SU	23.4094	a	a	a
EquivSeg_Ammonium_N_kg_per_ha	2016-11-16	91-120 cm	DM + A	21.7892	a	a	a
EquivSeg_Ammonium_N_kg_per_ha	2016-11-16	91-120 cm	Urea	15.9377	a	a	a
EquivSeg_Ammonium_N_kg_per_ha	2016-11-16	120-150 cm	DM + A	36.7081	a	a	a
EquivSeg_Ammonium_N_kg_per_ha	2016-11-16	120-150 cm	DM	35.103	a	a	a
EquivSeg_Ammonium_N_kg_per_ha	2016-11-16	120-150 cm	SU	24.9706	a	a	a
EquivSeg_Ammonium_N_kg_per_ha	2016-11-16	120-150 cm	Control	22.3941	a	a	a
EquivSeg_Ammonium_N_kg_per_ha	2016-11-16	120-150 cm	Urea	19.4651	a	a	a
EquivSeg_Ammonium_N_kg_per_ha	2017-11-13	0-7.6 cm	DM + SU	18.3406	a	a	a
EquivSeg_Ammonium_N_kg_per_ha	2017-11-13	0-7.6 cm	DM	17.7448	a	a	a
EquivSeg_Ammonium_N_kg_per_ha	2017-11-13	0-7.6 cm	SU	16.4843	a	a	a
EquivSeg_Ammonium_N_kg_per_ha	2017-11-13	0-7.6 cm	Urea	16.2548	a	a	a
EquivSeg_Ammonium_N_kg_per_ha	2017-11-13	0-7.6 cm	Control	12.8947	a	a	a
EquivSeg_Ammonium_N_kg_per_ha	2017-11-13	7.6-15 cm	DM	19.3256	a	a	a
EquivSeg_Ammonium_N_kg_per_ha	2017-11-13	7.6-15 cm	DM + SU	16.417	a	a	a
EquivSeg_Ammonium_N_kg_per_ha	2017-11-13	7.6-15 cm	Urea	16.3671	a	a	a
EquivSeg_Ammonium_N_kg_per_ha	2017-11-13	7.6-15 cm	SU	15.5462	a	a	a
EquivSeg_Ammonium_N_kg_per_ha	2017-11-13	7.6-15 cm	Control	15.2668	a	a	a
EquivSeg_Ammonium_N_kg_per_ha	2017-11-13	15-30 cm	DM	32.5353	a	a	a
EquivSeg_Ammonium_N_kg_per_ha	2017-11-13	15-30 cm	Urea	31.3331	a	a	a
EquivSeg_Ammonium_N_kg_per_ha	2017-11-13	15-30 cm	Control	27.7012	a	a	a
EquivSeg_Ammonium_N_kg_per_ha	2017-11-13	15-30 cm	DM + SU	26.5242	a	a	a
EquivSeg_Ammonium_N_kg_per_ha	2017-11-13	15-30 cm	SU	24.9678	a	a	a
EquivSeg_Ammonium_N_kg_per_ha	2017-11-13	30-61 cm	SU	49.5079	a	a	a
EquivSeg_Ammonium_N_kg_per_ha	2017-11-13	30-61 cm	DM	49.4928	a	a	a
EquivSeg_Ammonium_N_kg_per_ha	2017-11-13	30-61 cm	DM + SU	37.9806	a	ab	ab
EquivSeg_Ammonium_N_kg_per_ha	2017-11-13	30-61 cm	Control	32.9819	a	ab	b
EquivSeg_Ammonium_N_kg_per_ha	2017-11-13	30-61 cm	Urea	30.9291	a	b	b
EquivSeg_Ammonium_N_kg_per_ha	2017-11-13	61-91 cm	DM	40.3116	a	a	a
EquivSeg_Ammonium_N_kg_per_ha	2017-11-13	61-91 cm	SU	39.8269	a	a	a
EquivSeg_Ammonium_N_kg_per_ha	2017-11-13	61-91 cm	Urea	39.1082	a	a	a
EquivSeg_Ammonium_N_kg_per_ha	2017-11-13	61-91 cm	DM + SU	37.6688	a	a	a
EquivSeg_Ammonium_N_kg_per_ha	2017-11-13	61-91 cm	Control	32.4205	a	a	a
EquivSeg_Ammonium_N_kg_per_ha	2017-11-13	91-120 cm	DM	35.1656	a	a	a
EquivSeg_Ammonium_N_kg_per_ha	2017-11-13	91-120 cm	DM + SU	34.3479	a	a	a
EquivSeg_Ammonium_N_kg_per_ha	2017-11-13	91-120 cm	SU	33.8033	a	a	a
EquivSeg_Ammonium_N_kg_per_ha	2017-11-13	91-120 cm	Control	29.2377	a	a	a
EquivSeg_Ammonium_N_kg_per_ha	2017-11-13	91-120 cm	Urea	24.0681	a	a	a
EquivSeg_Ammonium_N_kg_per_ha	2017-11-13	120-150 cm	SU	50.783	a	a	a
EquivSeg_Ammonium_N_kg_per_ha	2017-11-13	120-150 cm	Urea	46.3766	a	a	a
EquivSeg_Ammonium_N_kg_per_ha	2017-11-13	120-150 cm	DM	39.7295	a	a	a
EquivSeg_Ammonium_N_kg_per_ha	2017-11-13	120-150 cm	Control	38.2462	a	a	a
EquivSeg_Extractable_P_kg_per_ha	2012-02-01	0-7.6 cm	DM	38.1577	a	a	a
EquivSeg_Extractable_P_kg_per_ha	2012-02-01	0-7.6 cm	Control	20.8517	ab	ab	ab
EquivSeg_Extractable_P_kg_per_ha	2012-02-01	0-7.6 cm	DM + A	17.5328	ab	b	b
EquivSeg_Extractable_P_kg_per_ha	2012-02-01	0-7.6 cm	Urea	16.9259	ab	b	b
EquivSeg_Extractable_P_kg_per_ha	2012-02-01	0-7.6 cm	SU	13.8779	b	b	b
EquivSeg_Extractable_P_kg_per_ha	2012-02-01	7.6-15 cm	DM	7.35072	a	a	a
EquivSeg_Extractable_P_kg_per_ha	2012-02-01	7.6-15 cm	Control	5.3312	a	a	a
EquivSeg_Extractable_P_kg_per_ha	2012-02-01	7.6-15 cm	DM + A	5.2832	a	a	a
EquivSeg_Extractable_P_kg_per_ha	2012-02-01	7.6-15 cm	Urea	3.76366	a	a	a
EquivSeg_Extractable_P_kg_per_ha	2012-02-01	7.6-15 cm	SU	2.96061	a	a	a
EquivSeg_Extractable_P_kg_per_ha	2012-02-01	15-30 cm	DM + A	5.55832	a	a	a
EquivSeg_Extractable_P_kg_per_ha	2012-02-01	15-30 cm	DM	3.95248	a	a	a
EquivSeg_Extractable_P_kg_per_ha	2012-02-01	15-30 cm	Control	3.95014	a	a	a
EquivSeg_Extractable_P_kg_per_ha	2012-02-01	15-30 cm	SU	3.76547	a	a	a
EquivSeg_Extractable_P_kg_per_ha	2012-02-01	15-30 cm	Urea	3.58932	a	a	a
EquivSeg_Extractable_P_kg_per_ha	2012-11-16	0-7.6 cm	DM + A	72.2201	a	a	a
EquivSeg_Extractable_P_kg_per_ha	2012-11-16	0-7.6 cm	DM	53.788	a	a	a
EquivSeg_Extractable_P_kg_per_ha	2012-11-16	0-7.6 cm	SU	9.45699	b	b	b
EquivSeg_Extractable_P_kg_per_ha	2012-11-16	0-7.6 cm	Control	9.02318	b	b	b
EquivSeg_Extractable_P_kg_per_ha	2012-11-16	0-7.6 cm	Urea	7.06554	b	b	b
EquivSeg_Extractable_P_kg_per_ha	2012-11-16	7.6-15 cm	DM + A	47.5423	a	a	a
EquivSeg_Extractable_P_kg_per_ha	2012-11-16	7.6-15 cm	DM	29.7514	ab	ab	ab
EquivSeg_Extractable_P_kg_per_ha	2012-11-16	7.6-15 cm	SU	5.64723	b	b	bc
EquivSeg_Extractable_P_kg_per_ha	2012-11-16	7.6-15 cm	Control	4.82927	b	b	bc
EquivSeg_Extractable_P_kg_per_ha	2012-11-16	7.6-15 cm	Urea	3.92136	b	b	c
EquivSeg_Extractable_P_kg_per_ha	2012-11-16	15-30 cm	DM + A	13.5456	a	a	a
EquivSeg_Extractable_P_kg_per_ha	2012-11-16	15-30 cm	DM	8.01349	ab	ab	b
EquivSeg_Extractable_P_kg_per_ha	2012-11-16	15-30 cm	SU	6.2051	b	b	b
EquivSeg_Extractable_P_kg_per_ha	2012-11-16	15-30 cm	Control	6.06912	b	b	b
EquivSeg_Extractable_P_kg_per_ha	2012-11-16	15-30 cm	Urea	5.67322	b	b	b
EquivSeg_Extractable_P_kg_per_ha	2013-11-08	0-7.6 cm	DM + A	90.53	a	a	a
EquivSeg_Extractable_P_kg_per_ha	2013-11-08	0-7.6 cm	DM	77.7939	a	a	a
EquivSeg_Extractable_P_kg_per_ha	2013-11-08	0-7.6 cm	SU	17.8856	b	b	b
EquivSeg_Extractable_P_kg_per_ha	2013-11-08	0-7.6 cm	Control	13.4553	b	b	b
EquivSeg_Extractable_P_kg_per_ha	2013-11-08	0-7.6 cm	Urea	12.9548	b	b	b
EquivSeg_Extractable_P_kg_per_ha	2013-11-08	7.6-15 cm	DM	69.3176	a	a	a
EquivSeg_Extractable_P_kg_per_ha	2013-11-08	7.6-15 cm	DM + A	66.3085	a	a	a
EquivSeg_Extractable_P_kg_per_ha	2013-11-08	7.6-15 cm	SU	11.9963	b	b	b
EquivSeg_Extractable_P_kg_per_ha	2013-11-08	7.6-15 cm	Urea	7.29823	b	b	b
EquivSeg_Extractable_P_kg_per_ha	2013-11-08	7.6-15 cm	Control	6.678	b	b	b
EquivSeg_Extractable_P_kg_per_ha	2013-11-08	15-30 cm	DM	11.7031	a	a	a
EquivSeg_Extractable_P_kg_per_ha	2013-11-08	15-30 cm	DM + A	8.0278	a	a	a
EquivSeg_Extractable_P_kg_per_ha	2013-11-08	15-30 cm	Control	4.92171	a	a	a
EquivSeg_Extractable_P_kg_per_ha	2013-11-08	15-30 cm	Urea	4.83542	a	a	a
EquivSeg_Extractable_P_kg_per_ha	2013-11-08	15-30 cm	SU	4.31539	a	a	a
EquivSeg_Extractable_P_kg_per_ha	2016-11-16	0-7.6 cm	DM + A	103.661	a	a	a
EquivSeg_Extractable_P_kg_per_ha	2016-11-16	0-7.6 cm	DM	102.687	a	a	a
EquivSeg_Extractable_P_kg_per_ha	2016-11-16	0-7.6 cm	SU	15.925	b	b	b
EquivSeg_Extractable_P_kg_per_ha	2016-11-16	0-7.6 cm	Control	15.1209	b	b	b
EquivSeg_Extractable_P_kg_per_ha	2016-11-16	0-7.6 cm	Urea	8.80397	b	b	b
EquivSeg_Extractable_P_kg_per_ha	2016-11-16	7.6-15 cm	DM + A	104.74	a	a	a
EquivSeg_Extractable_P_kg_per_ha	2016-11-16	7.6-15 cm	DM	101.486	a	a	a
EquivSeg_Extractable_P_kg_per_ha	2016-11-16	7.6-15 cm	Control	12.4424	b	b	b
EquivSeg_Extractable_P_kg_per_ha	2016-11-16	7.6-15 cm	SU	7.84234	b	b	b
EquivSeg_Extractable_P_kg_per_ha	2016-11-16	7.6-15 cm	Urea	6.01419	b	b	b
EquivSeg_Extractable_P_kg_per_ha	2016-11-16	15-30 cm	DM	29.2286	a	a	a
EquivSeg_Extractable_P_kg_per_ha	2016-11-16	15-30 cm	DM + A	24.0083	a	a	a
EquivSeg_Extractable_P_kg_per_ha	2016-11-16	15-30 cm	Control	6.72	b	b	b
EquivSeg_Extractable_P_kg_per_ha	2016-11-16	15-30 cm	Urea	4.77028	b	b	b
EquivSeg_Extractable_P_kg_per_ha	2016-11-16	15-30 cm	SU	4.74032	b	b	b
EquivSeg_Inorganic_C_kg_per_ha	2012-02-01	0-7.6 cm	Control	10306.7	a	a	a
EquivSeg_Inorganic_C_kg_per_ha	2012-02-01	0-7.6 cm	SU	10284.4	a	a	a
EquivSeg_Inorganic_C_kg_per_ha	2012-02-01	0-7.6 cm	Urea	10274.8	a	a	a
EquivSeg_Inorganic_C_kg_per_ha	2012-02-01	0-7.6 cm	DM	10187.3	a	a	a
EquivSeg_Inorganic_C_kg_per_ha	2012-02-01	0-7.6 cm	DM + A	10049.5	a	a	a
EquivSeg_Inorganic_C_kg_per_ha	2012-02-01	7.6-15 cm	SU	10917.9	a	a	a
EquivSeg_Inorganic_C_kg_per_ha	2012-02-01	7.6-15 cm	Urea	10859	a	a	a
EquivSeg_Inorganic_C_kg_per_ha	2012-02-01	7.6-15 cm	Control	10857.9	a	a	a
EquivSeg_Inorganic_C_kg_per_ha	2012-02-01	7.6-15 cm	DM + A	10783.1	a	a	a
EquivSeg_Inorganic_C_kg_per_ha	2012-02-01	7.6-15 cm	DM	10746.2	a	a	a
EquivSeg_Inorganic_C_kg_per_ha	2012-02-01	15-30 cm	Urea	29192	a	a	a
EquivSeg_Inorganic_C_kg_per_ha	2012-02-01	15-30 cm	DM	27144.4	a	a	a
EquivSeg_Inorganic_C_kg_per_ha	2012-02-01	15-30 cm	DM + A	27094.3	a	a	a
EquivSeg_Inorganic_C_kg_per_ha	2012-02-01	15-30 cm	SU	26992.6	a	a	a
EquivSeg_Inorganic_C_kg_per_ha	2012-02-01	15-30 cm	Control	26723.1	a	a	a
EquivSeg_Inorganic_C_kg_per_ha	2012-02-01	30-61 cm	DM	74660.3	a	a	a
EquivSeg_Inorganic_C_kg_per_ha	2012-02-01	30-61 cm	Control	74271	a	a	a
EquivSeg_Inorganic_C_kg_per_ha	2012-02-01	30-61 cm	SU	71379.2	a	a	a
EquivSeg_Inorganic_C_kg_per_ha	2012-02-01	30-61 cm	DM + A	69969.4	a	a	a
EquivSeg_Inorganic_C_kg_per_ha	2012-02-01	30-61 cm	Urea	59699	a	a	a
EquivSeg_Inorganic_C_kg_per_ha	2012-02-01	61-91 cm	Control	58794.6	a	a	a
EquivSeg_Inorganic_C_kg_per_ha	2012-02-01	61-91 cm	DM	56144	a	a	a
EquivSeg_Inorganic_C_kg_per_ha	2012-02-01	61-91 cm	SU	55866.1	a	a	a
EquivSeg_Inorganic_C_kg_per_ha	2012-02-01	61-91 cm	DM + A	54502.2	a	a	a
EquivSeg_Inorganic_C_kg_per_ha	2012-02-01	61-91 cm	Urea	51444.8	a	a	a
EquivSeg_Inorganic_C_kg_per_ha	2012-02-01	91-120 cm	SU	43645.3	a	a	a
EquivSeg_Inorganic_C_kg_per_ha	2012-02-01	91-120 cm	Control	43113.4	a	a	a
EquivSeg_Inorganic_C_kg_per_ha	2012-02-01	91-120 cm	DM	41440.2	a	a	a
EquivSeg_Inorganic_C_kg_per_ha	2012-02-01	91-120 cm	Urea	40370.1	a	a	a
EquivSeg_Inorganic_C_kg_per_ha	2012-02-01	91-120 cm	DM + A	40097.5	a	a	a
EquivSeg_Inorganic_C_kg_per_ha	2012-11-16	0-7.6 cm	Urea	10643.8	a	a	a
EquivSeg_Inorganic_C_kg_per_ha	2012-11-16	0-7.6 cm	DM	10628.6	a	a	a
EquivSeg_Inorganic_C_kg_per_ha	2012-11-16	0-7.6 cm	SU	10507.9	a	a	a
EquivSeg_Inorganic_C_kg_per_ha	2012-11-16	0-7.6 cm	DM + A	10449.2	a	a	a
EquivSeg_Inorganic_C_kg_per_ha	2012-11-16	0-7.6 cm	Control	10338.8	a	a	a
EquivSeg_Inorganic_C_kg_per_ha	2012-11-16	7.6-15 cm	Urea	11183.4	a	a	a
EquivSeg_Inorganic_C_kg_per_ha	2012-11-16	7.6-15 cm	Control	11126.1	a	a	a
EquivSeg_Inorganic_C_kg_per_ha	2012-11-16	7.6-15 cm	DM + A	11042.7	a	a	a
EquivSeg_Inorganic_C_kg_per_ha	2012-11-16	7.6-15 cm	DM	10811.6	a	a	a
EquivSeg_Inorganic_C_kg_per_ha	2012-11-16	7.6-15 cm	SU	10800.6	a	a	a
EquivSeg_Inorganic_C_kg_per_ha	2012-11-16	15-30 cm	Urea	28291.6	a	a	a
EquivSeg_Inorganic_C_kg_per_ha	2012-11-16	15-30 cm	DM	27796.6	a	a	a
EquivSeg_Inorganic_C_kg_per_ha	2012-11-16	15-30 cm	SU	27567.9	a	a	a
EquivSeg_Inorganic_C_kg_per_ha	2012-11-16	15-30 cm	Control	27236.1	a	a	a
EquivSeg_Inorganic_C_kg_per_ha	2012-11-16	15-30 cm	DM + A	26770.7	a	a	a
EquivSeg_Inorganic_C_kg_per_ha	2012-11-16	30-61 cm	Control	77727.8	a	a	a
EquivSeg_Inorganic_C_kg_per_ha	2012-11-16	30-61 cm	Urea	74587.8	a	a	a
EquivSeg_Inorganic_C_kg_per_ha	2012-11-16	30-61 cm	SU	71883.6	a	a	a
EquivSeg_Inorganic_C_kg_per_ha	2012-11-16	30-61 cm	DM + A	67819.2	a	a	a
EquivSeg_Inorganic_C_kg_per_ha	2012-11-16	30-61 cm	DM	67781.3	a	a	a
EquivSeg_Inorganic_C_kg_per_ha	2012-11-16	61-91 cm	Control	57975.9	a	a	a
EquivSeg_Inorganic_C_kg_per_ha	2012-11-16	61-91 cm	SU	57253.5	a	a	a
EquivSeg_Inorganic_C_kg_per_ha	2012-11-16	61-91 cm	DM + A	56884.3	a	a	a
EquivSeg_Inorganic_C_kg_per_ha	2012-11-16	61-91 cm	DM	54160	a	a	a
EquivSeg_Inorganic_C_kg_per_ha	2012-11-16	61-91 cm	Urea	52728	a	a	a
EquivSeg_Inorganic_C_kg_per_ha	2012-11-16	91-120 cm	SU	43120.6	a	a	a
EquivSeg_Inorganic_C_kg_per_ha	2012-11-16	91-120 cm	DM + A	42466.6	a	a	a
EquivSeg_Inorganic_C_kg_per_ha	2012-11-16	91-120 cm	Control	41593	a	a	a
EquivSeg_Inorganic_C_kg_per_ha	2012-11-16	91-120 cm	Urea	41167.9	a	a	a
EquivSeg_Inorganic_C_kg_per_ha	2012-11-16	91-120 cm	DM	37923.1	a	a	a
EquivSeg_Inorganic_C_kg_per_ha	2013-11-08	0-7.6 cm	SU	10278	a	a	a
EquivSeg_Inorganic_C_kg_per_ha	2013-11-08	0-7.6 cm	DM	10142.8	a	a	a
EquivSeg_Inorganic_C_kg_per_ha	2013-11-08	0-7.6 cm	Control	10137	a	a	a
EquivSeg_Inorganic_C_kg_per_ha	2013-11-08	0-7.6 cm	DM + A	9921.32	a	a	a
EquivSeg_Inorganic_C_kg_per_ha	2013-11-08	0-7.6 cm	Urea	9891.42	a	a	a
EquivSeg_Inorganic_C_kg_per_ha	2013-11-08	7.6-15 cm	DM	10703	a	a	a
EquivSeg_Inorganic_C_kg_per_ha	2013-11-08	7.6-15 cm	SU	10512.6	a	a	a
EquivSeg_Inorganic_C_kg_per_ha	2013-11-08	7.6-15 cm	Control	10508.7	a	a	a
EquivSeg_Inorganic_C_kg_per_ha	2013-11-08	7.6-15 cm	Urea	10197.3	a	a	a
EquivSeg_Inorganic_C_kg_per_ha	2013-11-08	7.6-15 cm	DM + A	10172.1	a	a	a
EquivSeg_Inorganic_C_kg_per_ha	2013-11-08	15-30 cm	DM	26379.7	a	a	a
EquivSeg_Inorganic_C_kg_per_ha	2013-11-08	15-30 cm	SU	26304.1	a	a	a
EquivSeg_Inorganic_C_kg_per_ha	2013-11-08	15-30 cm	Urea	26020.2	a	a	a
EquivSeg_Inorganic_C_kg_per_ha	2013-11-08	15-30 cm	DM + A	25076.7	a	a	a
EquivSeg_Inorganic_C_kg_per_ha	2013-11-08	15-30 cm	Control	23789.9	a	a	a
EquivSeg_Inorganic_C_kg_per_ha	2013-11-08	30-61 cm	SU	79389.6	a	a	a
EquivSeg_Inorganic_C_kg_per_ha	2013-11-08	30-61 cm	Control	74521	a	a	a
EquivSeg_Inorganic_C_kg_per_ha	2013-11-08	30-61 cm	DM	74380.8	a	a	a
EquivSeg_Inorganic_C_kg_per_ha	2013-11-08	30-61 cm	Urea	72530.5	a	a	a
EquivSeg_Inorganic_C_kg_per_ha	2013-11-08	30-61 cm	DM + A	68013.9	a	a	a
EquivSeg_Inorganic_C_kg_per_ha	2013-11-08	61-91 cm	SU	57005.6	a	a	a
EquivSeg_Inorganic_C_kg_per_ha	2013-11-08	61-91 cm	DM + A	56113.9	a	a	a
EquivSeg_Inorganic_C_kg_per_ha	2013-11-08	61-91 cm	Control	54580.6	a	a	a
EquivSeg_Inorganic_C_kg_per_ha	2013-11-08	61-91 cm	DM	53594.1	a	a	a
EquivSeg_Inorganic_C_kg_per_ha	2013-11-08	61-91 cm	Urea	53306.5	a	a	a
EquivSeg_Inorganic_C_kg_per_ha	2013-11-08	91-120 cm	DM	40823.8	a	a	a
EquivSeg_Inorganic_C_kg_per_ha	2013-11-08	91-120 cm	Urea	39540.1	a	a	a
EquivSeg_Inorganic_C_kg_per_ha	2013-11-08	91-120 cm	SU	39501.2	a	a	a
EquivSeg_Inorganic_C_kg_per_ha	2013-11-08	91-120 cm	Control	39056.2	a	a	a
EquivSeg_Inorganic_C_kg_per_ha	2013-11-08	91-120 cm	DM + A	37989.2	a	a	a
EquivSeg_Inorganic_C_kg_per_ha	2015-11-24	0-7.6 cm	Urea	12465.9	a	a	a
EquivSeg_Inorganic_C_kg_per_ha	2015-11-24	0-7.6 cm	Control	12424.1	a	a	a
EquivSeg_Inorganic_C_kg_per_ha	2015-11-24	0-7.6 cm	SU	12347.8	a	a	a
EquivSeg_Inorganic_C_kg_per_ha	2015-11-24	0-7.6 cm	DM + A	12199.2	a	a	a
EquivSeg_Inorganic_C_kg_per_ha	2015-11-24	0-7.6 cm	DM	11751.7	a	a	a
EquivSeg_Inorganic_C_kg_per_ha	2015-11-24	7.6-15 cm	DM + A	13127.9	a	a	a
EquivSeg_Inorganic_C_kg_per_ha	2015-11-24	7.6-15 cm	Control	13104.8	a	a	a
EquivSeg_Inorganic_C_kg_per_ha	2015-11-24	7.6-15 cm	Urea	12873.2	a	a	a
EquivSeg_Inorganic_C_kg_per_ha	2015-11-24	7.6-15 cm	SU	12720.6	a	a	a
EquivSeg_Inorganic_C_kg_per_ha	2015-11-24	7.6-15 cm	DM	12464.1	a	a	a
EquivSeg_Inorganic_C_kg_per_ha	2015-11-24	15-30 cm	DM + A	34170.5	a	a	a
EquivSeg_Inorganic_C_kg_per_ha	2015-11-24	15-30 cm	Urea	32756.6	a	a	a
EquivSeg_Inorganic_C_kg_per_ha	2015-11-24	15-30 cm	DM	32432.7	a	a	a
EquivSeg_Inorganic_C_kg_per_ha	2015-11-24	15-30 cm	SU	32341.9	a	a	a
EquivSeg_Inorganic_C_kg_per_ha	2015-11-24	15-30 cm	Control	32011.1	a	a	a
EquivSeg_Inorganic_C_kg_per_ha	2015-11-24	30-61 cm	Urea	93039.6	a	a	a
EquivSeg_Inorganic_C_kg_per_ha	2015-11-24	30-61 cm	DM	91582.8	a	a	a
EquivSeg_Inorganic_C_kg_per_ha	2015-11-24	30-61 cm	SU	89300.2	a	a	a
EquivSeg_Inorganic_C_kg_per_ha	2015-11-24	30-61 cm	DM + A	84569.7	a	a	a
EquivSeg_Inorganic_C_kg_per_ha	2015-11-24	30-61 cm	Control	81630.5	a	a	a
EquivSeg_Inorganic_C_kg_per_ha	2015-11-24	61-91 cm	Control	65236.8	a	a	a
EquivSeg_Inorganic_C_kg_per_ha	2015-11-24	61-91 cm	SU	64484	a	a	a
EquivSeg_Inorganic_C_kg_per_ha	2015-11-24	61-91 cm	DM + A	64472.1	a	a	a
EquivSeg_Inorganic_C_kg_per_ha	2015-11-24	61-91 cm	DM	64261.2	a	a	a
EquivSeg_Inorganic_C_kg_per_ha	2015-11-24	61-91 cm	Urea	63840.3	a	a	a
EquivSeg_Inorganic_C_kg_per_ha	2015-11-24	91-120 cm	DM	51047.9	a	a	a
EquivSeg_Inorganic_C_kg_per_ha	2015-11-24	91-120 cm	SU	50511	a	a	a
EquivSeg_Inorganic_C_kg_per_ha	2015-11-24	91-120 cm	Control	49937.8	a	a	a
EquivSeg_Inorganic_C_kg_per_ha	2015-11-24	91-120 cm	DM + A	48494.5	a	a	a
EquivSeg_Inorganic_C_kg_per_ha	2015-11-24	91-120 cm	Urea	42115.9	a	a	a
EquivSeg_Inorganic_C_kg_per_ha	2016-11-16	0-7.6 cm	Control	9938.89	a	a	a
EquivSeg_Inorganic_C_kg_per_ha	2016-11-16	0-7.6 cm	Urea	9925.96	a	a	a
EquivSeg_Inorganic_C_kg_per_ha	2016-11-16	0-7.6 cm	DM	9783.71	a	a	a
EquivSeg_Inorganic_C_kg_per_ha	2016-11-16	0-7.6 cm	SU	9757.85	a	a	a
EquivSeg_Inorganic_C_kg_per_ha	2016-11-16	0-7.6 cm	DM + A	9633.49	a	a	a
EquivSeg_Inorganic_C_kg_per_ha	2016-11-16	7.6-15 cm	Urea	10394.4	a	a	a
EquivSeg_Inorganic_C_kg_per_ha	2016-11-16	7.6-15 cm	Control	10382.6	a	a	a
EquivSeg_Inorganic_C_kg_per_ha	2016-11-16	7.6-15 cm	DM	10242	a	a	a
EquivSeg_Inorganic_C_kg_per_ha	2016-11-16	7.6-15 cm	SU	9998.61	a	a	a
EquivSeg_Inorganic_C_kg_per_ha	2016-11-16	7.6-15 cm	DM + A	9896.68	a	a	a
EquivSeg_Inorganic_C_kg_per_ha	2016-11-16	15-30 cm	SU	28768.9	a	a	a
EquivSeg_Inorganic_C_kg_per_ha	2016-11-16	15-30 cm	Urea	26955.1	a	a	a
EquivSeg_Inorganic_C_kg_per_ha	2016-11-16	15-30 cm	Control	26907.5	a	a	a
EquivSeg_Inorganic_C_kg_per_ha	2016-11-16	15-30 cm	DM + A	25922.7	a	a	a
EquivSeg_Inorganic_C_kg_per_ha	2016-11-16	15-30 cm	DM	25086.6	a	a	a
EquivSeg_Inorganic_C_kg_per_ha	2016-11-16	30-61 cm	SU	76985.6	a	a	a
EquivSeg_Inorganic_C_kg_per_ha	2016-11-16	30-61 cm	DM	75405.5	a	a	a
EquivSeg_Inorganic_C_kg_per_ha	2016-11-16	30-61 cm	Urea	72181.6	a	a	a
EquivSeg_Inorganic_C_kg_per_ha	2016-11-16	30-61 cm	Control	69321.3	a	a	a
EquivSeg_Inorganic_C_kg_per_ha	2016-11-16	30-61 cm	DM + A	68002.2	a	a	a
EquivSeg_Inorganic_C_kg_per_ha	2016-11-16	61-91 cm	Control	57752.8	a	a	a
EquivSeg_Inorganic_C_kg_per_ha	2016-11-16	61-91 cm	DM	55731.2	a	a	a
EquivSeg_Inorganic_C_kg_per_ha	2016-11-16	61-91 cm	Urea	54153.3	a	a	a
EquivSeg_Inorganic_C_kg_per_ha	2016-11-16	61-91 cm	DM + A	51562.1	a	a	a
EquivSeg_Inorganic_C_kg_per_ha	2016-11-16	61-91 cm	SU	51054.2	a	a	a
EquivSeg_Inorganic_C_kg_per_ha	2016-11-16	91-120 cm	Control	43802.8	a	a	a
EquivSeg_Inorganic_C_kg_per_ha	2016-11-16	91-120 cm	SU	41622.5	a	a	a
EquivSeg_Inorganic_C_kg_per_ha	2016-11-16	91-120 cm	DM + A	39901.1	a	a	a
EquivSeg_Inorganic_C_kg_per_ha	2016-11-16	91-120 cm	DM	39879.2	a	a	a
EquivSeg_Inorganic_C_kg_per_ha	2016-11-16	91-120 cm	Urea	38842	a	a	a
EquivSeg_Inorganic_C_kg_per_ha	2017-11-13	0-7.6 cm	DM + SU	11204.3	a	a	a
EquivSeg_Inorganic_C_kg_per_ha	2017-11-13	0-7.6 cm	Control	10653.8	a	a	a
EquivSeg_Inorganic_C_kg_per_ha	2017-11-13	0-7.6 cm	Urea	10474.4	a	a	a
EquivSeg_Inorganic_C_kg_per_ha	2017-11-13	0-7.6 cm	SU	10172	a	a	a
EquivSeg_Inorganic_C_kg_per_ha	2017-11-13	0-7.6 cm	DM	9596.77	a	a	a
EquivSeg_Inorganic_C_kg_per_ha	2017-11-13	7.6-15 cm	Control	10883.5	a	a	a
EquivSeg_Inorganic_C_kg_per_ha	2017-11-13	7.6-15 cm	Urea	10803	a	a	a
EquivSeg_Inorganic_C_kg_per_ha	2017-11-13	7.6-15 cm	SU	10481.6	a	a	a
EquivSeg_Inorganic_C_kg_per_ha	2017-11-13	7.6-15 cm	DM + SU	10380.9	a	a	a
EquivSeg_Inorganic_C_kg_per_ha	2017-11-13	7.6-15 cm	DM	10298	a	a	a
EquivSeg_Inorganic_C_kg_per_ha	2017-11-13	15-30 cm	DM + SU	29098.9	a	a	a
EquivSeg_Inorganic_C_kg_per_ha	2017-11-13	15-30 cm	Control	26801.1	a	a	a
EquivSeg_Inorganic_C_kg_per_ha	2017-11-13	15-30 cm	DM	26400.6	a	a	a
EquivSeg_Inorganic_C_kg_per_ha	2017-11-13	15-30 cm	SU	25951.2	a	a	a
EquivSeg_Inorganic_C_kg_per_ha	2017-11-13	15-30 cm	Urea	25666.3	a	a	a
EquivSeg_Inorganic_C_kg_per_ha	2017-11-13	30-61 cm	DM + SU	78870.5	a	a	a
EquivSeg_Inorganic_C_kg_per_ha	2017-11-13	30-61 cm	SU	76617.1	a	a	a
EquivSeg_Inorganic_C_kg_per_ha	2017-11-13	30-61 cm	Urea	74256.6	a	a	a
EquivSeg_Inorganic_C_kg_per_ha	2017-11-13	30-61 cm	DM	73167.4	a	a	a
EquivSeg_Inorganic_C_kg_per_ha	2017-11-13	30-61 cm	Control	72457	a	a	a
EquivSeg_Inorganic_C_kg_per_ha	2017-11-13	61-91 cm	SU	54641.8	a	a	a
EquivSeg_Inorganic_C_kg_per_ha	2017-11-13	61-91 cm	Control	54032	a	a	a
EquivSeg_Inorganic_C_kg_per_ha	2017-11-13	61-91 cm	Urea	53817.2	a	a	a
EquivSeg_Inorganic_C_kg_per_ha	2017-11-13	61-91 cm	DM	53676.2	a	a	a
EquivSeg_Inorganic_C_kg_per_ha	2017-11-13	61-91 cm	DM + SU	53263.5	a	a	a
EquivSeg_Inorganic_C_kg_per_ha	2017-11-13	91-120 cm	SU	45138.5	a	a	a
EquivSeg_Inorganic_C_kg_per_ha	2017-11-13	91-120 cm	DM + SU	40628.3	a	a	a
EquivSeg_Inorganic_C_kg_per_ha	2017-11-13	91-120 cm	Urea	39802.9	a	a	a
EquivSeg_Inorganic_C_kg_per_ha	2017-11-13	91-120 cm	Control	39571.4	a	a	a
EquivSeg_Inorganic_C_kg_per_ha	2017-11-13	91-120 cm	DM	38923.1	a	a	a
EquivSeg_Inorganic_N_kg_per_ha	2012-02-01	0-7.6 cm	SU	12.2219	a	a	a
EquivSeg_Inorganic_N_kg_per_ha	2012-02-01	0-7.6 cm	Urea	10.4169	a	a	a
EquivSeg_Inorganic_N_kg_per_ha	2012-02-01	0-7.6 cm	DM + A	10.211	a	a	a
EquivSeg_Inorganic_N_kg_per_ha	2012-02-01	0-7.6 cm	DM	9.64576	a	a	a
EquivSeg_Inorganic_N_kg_per_ha	2012-02-01	0-7.6 cm	Control	8.79112	a	a	a
EquivSeg_Inorganic_N_kg_per_ha	2012-02-01	7.6-15 cm	SU	9.49137	a	a	a
EquivSeg_Inorganic_N_kg_per_ha	2012-02-01	7.6-15 cm	DM	9.47859	a	a	a
EquivSeg_Inorganic_N_kg_per_ha	2012-02-01	7.6-15 cm	DM + A	8.76402	a	a	a
EquivSeg_Inorganic_N_kg_per_ha	2012-02-01	7.6-15 cm	Urea	8.44714	a	a	a
EquivSeg_Inorganic_N_kg_per_ha	2012-02-01	7.6-15 cm	Control	8.31495	a	a	a
EquivSeg_Inorganic_N_kg_per_ha	2012-02-01	15-30 cm	DM + A	18.2276	a	a	a
EquivSeg_Inorganic_N_kg_per_ha	2012-02-01	15-30 cm	DM	18.0285	a	a	a
EquivSeg_Inorganic_N_kg_per_ha	2012-02-01	15-30 cm	SU	17.718	a	a	a
EquivSeg_Inorganic_N_kg_per_ha	2012-02-01	15-30 cm	Control	17.0313	a	a	a
EquivSeg_Inorganic_N_kg_per_ha	2012-02-01	15-30 cm	Urea	16.4262	a	a	a
EquivSeg_Inorganic_N_kg_per_ha	2012-02-01	30-61 cm	DM	23.1535	a	a	a
EquivSeg_Inorganic_N_kg_per_ha	2012-02-01	30-61 cm	Control	22.32	a	a	a
EquivSeg_Inorganic_N_kg_per_ha	2012-02-01	30-61 cm	SU	21.5482	a	a	a
EquivSeg_Inorganic_N_kg_per_ha	2012-02-01	30-61 cm	DM + A	20.315	a	a	a
EquivSeg_Inorganic_N_kg_per_ha	2012-02-01	30-61 cm	Urea	17.1066	a	a	a
EquivSeg_Inorganic_N_kg_per_ha	2012-02-01	61-91 cm	Control	19.2823	a	a	a
EquivSeg_Inorganic_N_kg_per_ha	2012-02-01	61-91 cm	SU	19.0358	a	a	a
EquivSeg_Inorganic_N_kg_per_ha	2012-02-01	61-91 cm	DM + A	18.4124	a	a	a
EquivSeg_Inorganic_N_kg_per_ha	2012-02-01	61-91 cm	DM	18.174	a	a	a
EquivSeg_Inorganic_N_kg_per_ha	2012-02-01	61-91 cm	Urea	15.2871	a	a	a
EquivSeg_Inorganic_N_kg_per_ha	2012-02-01	91-120 cm	Control	20.2805	a	a	a
EquivSeg_Inorganic_N_kg_per_ha	2012-02-01	91-120 cm	SU	19.6896	a	a	a
EquivSeg_Inorganic_N_kg_per_ha	2012-02-01	91-120 cm	DM + A	18.9537	a	a	a
EquivSeg_Inorganic_N_kg_per_ha	2012-02-01	91-120 cm	DM	17.8455	a	a	a
EquivSeg_Inorganic_N_kg_per_ha	2012-02-01	91-120 cm	Urea	17.4601	a	a	a
EquivSeg_Inorganic_N_kg_per_ha	2012-02-01	120-150 cm	Control	32.0713	a	a	a
EquivSeg_Inorganic_N_kg_per_ha	2012-02-01	120-150 cm	DM	25.7424	a	a	a
EquivSeg_Inorganic_N_kg_per_ha	2012-02-01	120-150 cm	DM + A	25.6878	a	a	a
EquivSeg_Inorganic_N_kg_per_ha	2012-02-01	120-150 cm	SU	25.391	a	a	a
EquivSeg_Inorganic_N_kg_per_ha	2012-02-01	120-150 cm	Urea	20.3838	a	a	a
EquivSeg_Inorganic_N_kg_per_ha	2012-02-01	150-180 cm	Control	51.1179	a	a	a
EquivSeg_Inorganic_N_kg_per_ha	2012-02-01	150-180 cm	DM	42.3301	a	a	a
EquivSeg_Inorganic_N_kg_per_ha	2012-02-01	150-180 cm	SU	38.2466	a	a	a
EquivSeg_Inorganic_N_kg_per_ha	2012-02-01	150-180 cm	DM + A	38.2212	a	a	a
EquivSeg_Inorganic_N_kg_per_ha	2012-02-01	150-180 cm	Urea	32.1689	a	a	a
EquivSeg_Inorganic_N_kg_per_ha	2012-11-16	0-7.6 cm	DM + A	24.7482	a	a	a
EquivSeg_Inorganic_N_kg_per_ha	2012-11-16	0-7.6 cm	DM	19.9649	a	a	a
EquivSeg_Inorganic_N_kg_per_ha	2012-11-16	0-7.6 cm	Urea	16.7229	a	a	a
EquivSeg_Inorganic_N_kg_per_ha	2012-11-16	0-7.6 cm	SU	16.4377	a	a	a
EquivSeg_Inorganic_N_kg_per_ha	2012-11-16	0-7.6 cm	Control	10.3185	a	a	a
EquivSeg_Inorganic_N_kg_per_ha	2012-11-16	7.6-15 cm	DM + A	23.1013	a	a	a
EquivSeg_Inorganic_N_kg_per_ha	2012-11-16	7.6-15 cm	SU	19.4295	a	a	a
EquivSeg_Inorganic_N_kg_per_ha	2012-11-16	7.6-15 cm	DM	17.5715	a	a	a
EquivSeg_Inorganic_N_kg_per_ha	2012-11-16	7.6-15 cm	Urea	12.9848	a	a	a
EquivSeg_Inorganic_N_kg_per_ha	2012-11-16	7.6-15 cm	Control	11.7479	a	a	a
EquivSeg_Inorganic_N_kg_per_ha	2012-11-16	15-30 cm	SU	32.8376	a	a	a
EquivSeg_Inorganic_N_kg_per_ha	2012-11-16	15-30 cm	DM + A	26.9233	a	a	a
EquivSeg_Inorganic_N_kg_per_ha	2012-11-16	15-30 cm	DM	25.2801	a	a	a
EquivSeg_Inorganic_N_kg_per_ha	2012-11-16	15-30 cm	Control	22.6145	a	a	a
EquivSeg_Inorganic_N_kg_per_ha	2012-11-16	15-30 cm	Urea	21.4976	a	a	a
EquivSeg_Inorganic_N_kg_per_ha	2012-11-16	30-61 cm	SU	62.3038	a	a	a
EquivSeg_Inorganic_N_kg_per_ha	2012-11-16	30-61 cm	Control	55.6343	a	a	a
EquivSeg_Inorganic_N_kg_per_ha	2012-11-16	30-61 cm	DM	50.7408	a	a	a
EquivSeg_Inorganic_N_kg_per_ha	2012-11-16	30-61 cm	DM + A	47.7796	a	a	a
EquivSeg_Inorganic_N_kg_per_ha	2012-11-16	30-61 cm	Urea	38.5763	a	a	a
EquivSeg_Inorganic_N_kg_per_ha	2012-11-16	61-91 cm	SU	48.3193	a	a	a
EquivSeg_Inorganic_N_kg_per_ha	2012-11-16	61-91 cm	Urea	46.3653	a	a	a
EquivSeg_Inorganic_N_kg_per_ha	2012-11-16	61-91 cm	Control	40.3611	a	a	a
EquivSeg_Inorganic_N_kg_per_ha	2012-11-16	61-91 cm	DM	39.5246	a	a	a
EquivSeg_Inorganic_N_kg_per_ha	2012-11-16	61-91 cm	DM + A	39.1581	a	a	a
EquivSeg_Inorganic_N_kg_per_ha	2012-11-16	91-120 cm	Urea	43.7863	a	a	a
EquivSeg_Inorganic_N_kg_per_ha	2012-11-16	91-120 cm	SU	36.8156	a	a	a
EquivSeg_Inorganic_N_kg_per_ha	2012-11-16	91-120 cm	DM + A	35.6277	a	a	a
EquivSeg_Inorganic_N_kg_per_ha	2012-11-16	91-120 cm	Control	33.0346	a	a	a
EquivSeg_Inorganic_N_kg_per_ha	2012-11-16	91-120 cm	DM	29.5579	a	a	a
EquivSeg_Inorganic_N_kg_per_ha	2012-11-16	120-150 cm	SU	48.8341	a	a	a
EquivSeg_Inorganic_N_kg_per_ha	2012-11-16	120-150 cm	Urea	48.0131	a	a	a
EquivSeg_Inorganic_N_kg_per_ha	2012-11-16	120-150 cm	DM	42.159	a	a	a
EquivSeg_Inorganic_N_kg_per_ha	2012-11-16	120-150 cm	DM + A	40.9196	a	a	a
EquivSeg_Inorganic_N_kg_per_ha	2012-11-16	120-150 cm	Control	40.7021	a	a	a
EquivSeg_Inorganic_N_kg_per_ha	2012-11-16	150-180 cm	SU	61.1934	a	a	a
EquivSeg_Inorganic_N_kg_per_ha	2012-11-16	150-180 cm	DM	59.2377	a	a	a
EquivSeg_Inorganic_N_kg_per_ha	2012-11-16	150-180 cm	Control	54.9526	a	a	a
EquivSeg_Inorganic_N_kg_per_ha	2012-11-16	150-180 cm	Urea	49.4832	a	a	a
EquivSeg_Inorganic_N_kg_per_ha	2012-11-16	150-180 cm	DM + A	44.9967	a	a	a
EquivSeg_Inorganic_N_kg_per_ha	2013-11-08	0-7.6 cm	DM	19.1028	a	a	a
EquivSeg_Inorganic_N_kg_per_ha	2013-11-08	0-7.6 cm	DM + A	18.7021	ab	a	a
EquivSeg_Inorganic_N_kg_per_ha	2013-11-08	0-7.6 cm	Urea	15.5369	ab	ab	ab
EquivSeg_Inorganic_N_kg_per_ha	2013-11-08	0-7.6 cm	SU	13.2384	ab	ab	ab
EquivSeg_Inorganic_N_kg_per_ha	2013-11-08	0-7.6 cm	Control	6.86985	b	b	b
EquivSeg_Inorganic_N_kg_per_ha	2013-11-08	7.6-15 cm	DM + A	18.5797	a	a	a
EquivSeg_Inorganic_N_kg_per_ha	2013-11-08	7.6-15 cm	DM	18.2622	a	a	a
EquivSeg_Inorganic_N_kg_per_ha	2013-11-08	7.6-15 cm	Urea	16.4711	a	a	a
EquivSeg_Inorganic_N_kg_per_ha	2013-11-08	7.6-15 cm	SU	14.0511	ab	ab	ab
EquivSeg_Inorganic_N_kg_per_ha	2013-11-08	7.6-15 cm	Control	8.90858	b	b	b
EquivSeg_Inorganic_N_kg_per_ha	2013-11-08	15-30 cm	DM + A	29.8646	a	a	a
EquivSeg_Inorganic_N_kg_per_ha	2013-11-08	15-30 cm	Urea	29.6285	a	a	a
EquivSeg_Inorganic_N_kg_per_ha	2013-11-08	15-30 cm	DM	28.7973	a	a	ab
EquivSeg_Inorganic_N_kg_per_ha	2013-11-08	15-30 cm	SU	27.4021	a	a	ab
EquivSeg_Inorganic_N_kg_per_ha	2013-11-08	15-30 cm	Control	16.2126	a	a	b
EquivSeg_Inorganic_N_kg_per_ha	2013-11-08	30-61 cm	Urea	40.8262	a	a	a
EquivSeg_Inorganic_N_kg_per_ha	2013-11-08	30-61 cm	SU	38.4335	a	a	a
EquivSeg_Inorganic_N_kg_per_ha	2013-11-08	30-61 cm	DM	33.3259	ab	a	a
EquivSeg_Inorganic_N_kg_per_ha	2013-11-08	30-61 cm	DM + A	31.7679	ab	ab	ab
EquivSeg_Inorganic_N_kg_per_ha	2013-11-08	30-61 cm	Control	19.7726	b	b	b
EquivSeg_Inorganic_N_kg_per_ha	2013-11-08	61-91 cm	Urea	37.1157	a	a	a
EquivSeg_Inorganic_N_kg_per_ha	2013-11-08	61-91 cm	SU	31.7327	ab	ab	ab
EquivSeg_Inorganic_N_kg_per_ha	2013-11-08	61-91 cm	DM	27.9796	ab	ab	abc
EquivSeg_Inorganic_N_kg_per_ha	2013-11-08	61-91 cm	DM + A	25.0784	ab	b	bc
EquivSeg_Inorganic_N_kg_per_ha	2013-11-08	61-91 cm	Control	20.8947	b	b	c
EquivSeg_Inorganic_N_kg_per_ha	2013-11-08	91-120 cm	Urea	29.1515	a	a	a
EquivSeg_Inorganic_N_kg_per_ha	2013-11-08	91-120 cm	SU	24.3037	ab	ab	ab
EquivSeg_Inorganic_N_kg_per_ha	2013-11-08	91-120 cm	DM + A	22.3951	ab	ab	abc
EquivSeg_Inorganic_N_kg_per_ha	2013-11-08	91-120 cm	DM	20.6325	ab	b	bc
EquivSeg_Inorganic_N_kg_per_ha	2013-11-08	91-120 cm	Control	16.0928	b	b	c
EquivSeg_Inorganic_N_kg_per_ha	2013-11-08	120-150 cm	SU	29.5551	a	a	a
EquivSeg_Inorganic_N_kg_per_ha	2013-11-08	120-150 cm	Urea	28.122	a	a	a
EquivSeg_Inorganic_N_kg_per_ha	2013-11-08	120-150 cm	DM + A	23.4574	a	a	a
EquivSeg_Inorganic_N_kg_per_ha	2013-11-08	120-150 cm	DM	22.572	a	a	a
EquivSeg_Inorganic_N_kg_per_ha	2013-11-08	120-150 cm	Control	21.3234	a	a	a
EquivSeg_Inorganic_N_kg_per_ha	2013-11-08	150-180 cm	Urea	29.6989	a	a	a
EquivSeg_Inorganic_N_kg_per_ha	2013-11-08	150-180 cm	SU	29.1797	a	a	a
EquivSeg_Inorganic_N_kg_per_ha	2013-11-08	150-180 cm	DM + A	25.1769	a	a	a
EquivSeg_Inorganic_N_kg_per_ha	2013-11-08	150-180 cm	DM	25.0874	a	a	a
EquivSeg_Inorganic_N_kg_per_ha	2013-11-08	150-180 cm	Control	22.0933	a	a	a
EquivSeg_Inorganic_N_kg_per_ha	2015-11-24	0-7.6 cm	DM + A	15.3018	a	a	a
EquivSeg_Inorganic_N_kg_per_ha	2015-11-24	0-7.6 cm	DM	13.5113	a	a	a
EquivSeg_Inorganic_N_kg_per_ha	2015-11-24	0-7.6 cm	SU	13.4132	a	a	a
EquivSeg_Inorganic_N_kg_per_ha	2015-11-24	0-7.6 cm	Control	10.4029	a	a	a
EquivSeg_Inorganic_N_kg_per_ha	2015-11-24	0-7.6 cm	Urea	9.79637	a	a	a
EquivSeg_Inorganic_N_kg_per_ha	2015-11-24	7.6-15 cm	DM + A	18.4483	a	a	a
EquivSeg_Inorganic_N_kg_per_ha	2015-11-24	7.6-15 cm	DM	18.0513	a	a	a
EquivSeg_Inorganic_N_kg_per_ha	2015-11-24	7.6-15 cm	SU	17.1756	a	a	a
EquivSeg_Inorganic_N_kg_per_ha	2015-11-24	7.6-15 cm	Urea	12.6171	a	a	a
EquivSeg_Inorganic_N_kg_per_ha	2015-11-24	7.6-15 cm	Control	11.5025	a	a	a
EquivSeg_Inorganic_N_kg_per_ha	2015-11-24	15-30 cm	SU	40.8415	a	a	a
EquivSeg_Inorganic_N_kg_per_ha	2015-11-24	15-30 cm	Urea	35.9999	a	a	a
EquivSeg_Inorganic_N_kg_per_ha	2015-11-24	15-30 cm	DM	32.6388	a	a	a
EquivSeg_Inorganic_N_kg_per_ha	2015-11-24	15-30 cm	DM + A	29.1694	a	a	a
EquivSeg_Inorganic_N_kg_per_ha	2015-11-24	15-30 cm	Control	21.9733	a	a	a
EquivSeg_Inorganic_N_kg_per_ha	2015-11-24	30-61 cm	SU	50.631	a	a	a
EquivSeg_Inorganic_N_kg_per_ha	2015-11-24	30-61 cm	DM + A	49.9802	a	a	a
EquivSeg_Inorganic_N_kg_per_ha	2015-11-24	30-61 cm	Urea	48.5065	a	a	a
EquivSeg_Inorganic_N_kg_per_ha	2015-11-24	30-61 cm	DM	44.8409	a	a	a
EquivSeg_Inorganic_N_kg_per_ha	2015-11-24	30-61 cm	Control	38.2163	a	a	a
EquivSeg_Inorganic_N_kg_per_ha	2015-11-24	61-91 cm	DM	57.1719	a	a	a
EquivSeg_Inorganic_N_kg_per_ha	2015-11-24	61-91 cm	SU	46.9403	a	a	ab
EquivSeg_Inorganic_N_kg_per_ha	2015-11-24	61-91 cm	DM + A	41.8668	a	a	ab
EquivSeg_Inorganic_N_kg_per_ha	2015-11-24	61-91 cm	Urea	39.8004	a	a	ab
EquivSeg_Inorganic_N_kg_per_ha	2015-11-24	61-91 cm	Control	32.5892	a	a	b
EquivSeg_Inorganic_N_kg_per_ha	2015-11-24	91-120 cm	Urea	42.1609	a	a	a
EquivSeg_Inorganic_N_kg_per_ha	2015-11-24	91-120 cm	SU	40.2751	a	a	a
EquivSeg_Inorganic_N_kg_per_ha	2015-11-24	91-120 cm	DM	36.2328	a	a	a
EquivSeg_Inorganic_N_kg_per_ha	2015-11-24	91-120 cm	DM + A	35.8449	a	a	a
EquivSeg_Inorganic_N_kg_per_ha	2015-11-24	91-120 cm	Control	32.964	a	a	a
EquivSeg_Inorganic_N_kg_per_ha	2016-11-16	0-7.6 cm	DM	18.6579	a	a	a
EquivSeg_Inorganic_N_kg_per_ha	2016-11-16	0-7.6 cm	Urea	17.2193	a	a	a
EquivSeg_Inorganic_N_kg_per_ha	2016-11-16	0-7.6 cm	SU	15.2409	a	a	a
EquivSeg_Inorganic_N_kg_per_ha	2016-11-16	0-7.6 cm	DM + A	14.2282	a	a	a
EquivSeg_Inorganic_N_kg_per_ha	2016-11-16	0-7.6 cm	Control	12.8512	a	a	a
EquivSeg_Inorganic_N_kg_per_ha	2016-11-16	7.6-15 cm	DM + A	17.9917	a	a	a
EquivSeg_Inorganic_N_kg_per_ha	2016-11-16	7.6-15 cm	DM	17.9187	a	a	a
EquivSeg_Inorganic_N_kg_per_ha	2016-11-16	7.6-15 cm	Control	14.3498	a	a	a
EquivSeg_Inorganic_N_kg_per_ha	2016-11-16	7.6-15 cm	Urea	13.1694	a	a	a
EquivSeg_Inorganic_N_kg_per_ha	2016-11-16	7.6-15 cm	SU	11.9483	a	a	a
EquivSeg_Inorganic_N_kg_per_ha	2016-11-16	15-30 cm	SU	31.2849	a	a	a
EquivSeg_Inorganic_N_kg_per_ha	2016-11-16	15-30 cm	DM + A	31.1456	a	a	a
EquivSeg_Inorganic_N_kg_per_ha	2016-11-16	15-30 cm	Urea	21.1529	a	a	a
EquivSeg_Inorganic_N_kg_per_ha	2016-11-16	15-30 cm	DM	20.924	a	a	a
EquivSeg_Inorganic_N_kg_per_ha	2016-11-16	15-30 cm	Control	18.3258	a	a	a
EquivSeg_Inorganic_N_kg_per_ha	2016-11-16	30-61 cm	SU	41.6265	a	a	a
EquivSeg_Inorganic_N_kg_per_ha	2016-11-16	30-61 cm	DM + A	34.4764	a	a	a
EquivSeg_Inorganic_N_kg_per_ha	2016-11-16	30-61 cm	DM	32.2626	a	a	a
EquivSeg_Inorganic_N_kg_per_ha	2016-11-16	30-61 cm	Urea	30.8782	a	a	a
EquivSeg_Inorganic_N_kg_per_ha	2016-11-16	30-61 cm	Control	25.4288	a	a	a
EquivSeg_Inorganic_N_kg_per_ha	2016-11-16	61-91 cm	SU	38.3581	a	a	a
EquivSeg_Inorganic_N_kg_per_ha	2016-11-16	61-91 cm	DM	29.023	a	a	a
EquivSeg_Inorganic_N_kg_per_ha	2016-11-16	61-91 cm	Control	27.5533	a	a	a
EquivSeg_Inorganic_N_kg_per_ha	2016-11-16	61-91 cm	Urea	23.3473	a	a	a
EquivSeg_Inorganic_N_kg_per_ha	2016-11-16	61-91 cm	DM + A	23.29	a	a	a
EquivSeg_Inorganic_N_kg_per_ha	2016-11-16	91-120 cm	SU	43.8805	a	a	a
EquivSeg_Inorganic_N_kg_per_ha	2016-11-16	91-120 cm	DM	31.8638	a	a	a
EquivSeg_Inorganic_N_kg_per_ha	2016-11-16	91-120 cm	Control	27.2694	a	a	a
EquivSeg_Inorganic_N_kg_per_ha	2016-11-16	91-120 cm	DM + A	26.6356	a	a	a
EquivSeg_Inorganic_N_kg_per_ha	2016-11-16	91-120 cm	Urea	25.8039	a	a	a
EquivSeg_Inorganic_N_kg_per_ha	2016-11-16	120-150 cm	DM + A	55.6726	a	a	a
EquivSeg_Inorganic_N_kg_per_ha	2016-11-16	120-150 cm	Urea	50.5299	a	a	a
EquivSeg_Inorganic_N_kg_per_ha	2016-11-16	120-150 cm	DM	50.384	a	a	a
EquivSeg_Inorganic_N_kg_per_ha	2016-11-16	120-150 cm	SU	50.3369	a	a	a
EquivSeg_Inorganic_N_kg_per_ha	2016-11-16	120-150 cm	Control	26.6089	a	a	a
EquivSeg_Inorganic_N_kg_per_ha	2017-11-13	0-7.6 cm	Urea	29.464	a	a	a
EquivSeg_Inorganic_N_kg_per_ha	2017-11-13	0-7.6 cm	DM	26.9207	a	a	a
EquivSeg_Inorganic_N_kg_per_ha	2017-11-13	0-7.6 cm	SU	26.6363	a	a	a
EquivSeg_Inorganic_N_kg_per_ha	2017-11-13	0-7.6 cm	DM + SU	22.222	a	a	a
EquivSeg_Inorganic_N_kg_per_ha	2017-11-13	0-7.6 cm	Control	17.5315	a	a	a
EquivSeg_Inorganic_N_kg_per_ha	2017-11-13	7.6-15 cm	DM	31.5991	a	a	a
EquivSeg_Inorganic_N_kg_per_ha	2017-11-13	7.6-15 cm	Urea	27.4238	a	a	a
EquivSeg_Inorganic_N_kg_per_ha	2017-11-13	7.6-15 cm	DM + SU	26.1632	a	a	a
EquivSeg_Inorganic_N_kg_per_ha	2017-11-13	7.6-15 cm	SU	25.7394	a	a	a
EquivSeg_Inorganic_N_kg_per_ha	2017-11-13	7.6-15 cm	Control	17.6091	a	a	a
EquivSeg_Inorganic_N_kg_per_ha	2017-11-13	15-30 cm	Urea	44.7582	a	a	a
EquivSeg_Inorganic_N_kg_per_ha	2017-11-13	15-30 cm	DM	41.8398	a	a	a
EquivSeg_Inorganic_N_kg_per_ha	2017-11-13	15-30 cm	SU	37.5259	a	a	a
EquivSeg_Inorganic_N_kg_per_ha	2017-11-13	15-30 cm	DM + SU	35.7423	a	a	a
EquivSeg_Inorganic_N_kg_per_ha	2017-11-13	15-30 cm	Control	30.627	a	a	a
EquivSeg_Inorganic_N_kg_per_ha	2017-11-13	30-61 cm	SU	56.6731	a	a	a
EquivSeg_Inorganic_N_kg_per_ha	2017-11-13	30-61 cm	DM	53.8732	a	a	ab
EquivSeg_Inorganic_N_kg_per_ha	2017-11-13	30-61 cm	Urea	48.5826	a	a	ab
EquivSeg_Inorganic_N_kg_per_ha	2017-11-13	30-61 cm	DM + SU	41.5294	a	a	ab
EquivSeg_Inorganic_N_kg_per_ha	2017-11-13	30-61 cm	Control	34.7715	a	a	b
EquivSeg_Inorganic_N_kg_per_ha	2017-11-13	61-91 cm	SU	46.7367	a	a	a
EquivSeg_Inorganic_N_kg_per_ha	2017-11-13	61-91 cm	Urea	42.5208	a	a	a
EquivSeg_Inorganic_N_kg_per_ha	2017-11-13	61-91 cm	DM	42.2874	a	a	a
EquivSeg_Inorganic_N_kg_per_ha	2017-11-13	61-91 cm	DM + SU	39.6306	a	a	a
EquivSeg_Inorganic_N_kg_per_ha	2017-11-13	61-91 cm	Control	33.3837	a	a	a
EquivSeg_Inorganic_N_kg_per_ha	2017-11-13	91-120 cm	SU	41.7388	a	a	a
EquivSeg_Inorganic_N_kg_per_ha	2017-11-13	91-120 cm	DM	36.4279	a	a	a
EquivSeg_Inorganic_N_kg_per_ha	2017-11-13	91-120 cm	DM + SU	36.1912	a	a	a
EquivSeg_Inorganic_N_kg_per_ha	2017-11-13	91-120 cm	Control	30.0304	a	a	a
EquivSeg_Inorganic_N_kg_per_ha	2017-11-13	91-120 cm	Urea	26.1405	a	a	a
EquivSeg_Inorganic_N_kg_per_ha	2017-11-13	120-150 cm	SU	75.3781	a	a	a
EquivSeg_Inorganic_N_kg_per_ha	2017-11-13	120-150 cm	DM	63.6793	a	a	a
EquivSeg_Inorganic_N_kg_per_ha	2017-11-13	120-150 cm	Urea	51.9568	a	a	a
EquivSeg_Inorganic_N_kg_per_ha	2017-11-13	120-150 cm	Control	39.344	a	a	a
EquivSeg_Nitrate_N_kg_per_ha	2012-02-01	0-7.6 cm	SU	7.52194	a	a	a
EquivSeg_Nitrate_N_kg_per_ha	2012-02-01	0-7.6 cm	DM + A	6.44873	a	a	a
EquivSeg_Nitrate_N_kg_per_ha	2012-02-01	0-7.6 cm	Urea	6.18863	a	a	a
EquivSeg_Nitrate_N_kg_per_ha	2012-02-01	0-7.6 cm	Control	5.3542	a	a	a
EquivSeg_Nitrate_N_kg_per_ha	2012-02-01	0-7.6 cm	DM	5.16857	a	a	a
EquivSeg_Nitrate_N_kg_per_ha	2012-02-01	7.6-15 cm	DM + A	4.69083	a	a	a
EquivSeg_Nitrate_N_kg_per_ha	2012-02-01	7.6-15 cm	SU	4.36702	a	a	a
EquivSeg_Nitrate_N_kg_per_ha	2012-02-01	7.6-15 cm	Control	4.10083	a	a	a
EquivSeg_Nitrate_N_kg_per_ha	2012-02-01	7.6-15 cm	DM	4.09641	a	a	a
EquivSeg_Nitrate_N_kg_per_ha	2012-02-01	7.6-15 cm	Urea	4.09186	a	a	a
EquivSeg_Nitrate_N_kg_per_ha	2012-02-01	15-30 cm	DM + A	8.70031	a	a	a
EquivSeg_Nitrate_N_kg_per_ha	2012-02-01	15-30 cm	Control	7.84525	a	a	a
EquivSeg_Nitrate_N_kg_per_ha	2012-02-01	15-30 cm	DM	7.31902	a	a	a
EquivSeg_Nitrate_N_kg_per_ha	2012-02-01	15-30 cm	SU	7.24175	a	a	a
EquivSeg_Nitrate_N_kg_per_ha	2012-02-01	15-30 cm	Urea	7.1975	a	a	a
EquivSeg_Nitrate_N_kg_per_ha	2012-02-01	30-61 cm	Control	6.91079	a	a	a
EquivSeg_Nitrate_N_kg_per_ha	2012-02-01	30-61 cm	DM + A	6.17745	a	a	a
EquivSeg_Nitrate_N_kg_per_ha	2012-02-01	30-61 cm	SU	5.5955	a	a	a
EquivSeg_Nitrate_N_kg_per_ha	2012-02-01	30-61 cm	DM	4.93444	a	a	a
EquivSeg_Nitrate_N_kg_per_ha	2012-02-01	30-61 cm	Urea	4.02968	a	a	a
EquivSeg_Nitrate_N_kg_per_ha	2012-02-01	61-91 cm	Control	3.735	a	a	a
EquivSeg_Nitrate_N_kg_per_ha	2012-02-01	61-91 cm	DM + A	3.55313	a	a	a
EquivSeg_Nitrate_N_kg_per_ha	2012-02-01	61-91 cm	SU	3.06377	a	a	a
EquivSeg_Nitrate_N_kg_per_ha	2012-02-01	61-91 cm	DM	2.78011	a	a	a
EquivSeg_Nitrate_N_kg_per_ha	2012-02-01	61-91 cm	Urea	2.27925	a	a	a
EquivSeg_Nitrate_N_kg_per_ha	2012-02-01	91-120 cm	Control	4.67094	a	a	a
EquivSeg_Nitrate_N_kg_per_ha	2012-02-01	91-120 cm	DM + A	3.42603	a	a	a
EquivSeg_Nitrate_N_kg_per_ha	2012-02-01	91-120 cm	SU	2.4936	a	a	a
EquivSeg_Nitrate_N_kg_per_ha	2012-02-01	91-120 cm	DM	2.36101	a	a	a
EquivSeg_Nitrate_N_kg_per_ha	2012-02-01	91-120 cm	Urea	1.71881	a	a	a
EquivSeg_Nitrate_N_kg_per_ha	2012-02-01	120-150 cm	Control	15.0609	a	a	a
EquivSeg_Nitrate_N_kg_per_ha	2012-02-01	120-150 cm	DM	9.76107	a	a	a
EquivSeg_Nitrate_N_kg_per_ha	2012-02-01	120-150 cm	SU	9.59769	a	a	a
EquivSeg_Nitrate_N_kg_per_ha	2012-02-01	120-150 cm	DM + A	8.69679	a	a	a
EquivSeg_Nitrate_N_kg_per_ha	2012-02-01	120-150 cm	Urea	4.61973	a	a	a
EquivSeg_Nitrate_N_kg_per_ha	2012-02-01	150-180 cm	Control	27.1207	a	a	a
EquivSeg_Nitrate_N_kg_per_ha	2012-02-01	150-180 cm	DM	22.1187	a	a	a
EquivSeg_Nitrate_N_kg_per_ha	2012-02-01	150-180 cm	SU	18.1956	a	a	a
EquivSeg_Nitrate_N_kg_per_ha	2012-02-01	150-180 cm	DM + A	17.1567	a	a	a
EquivSeg_Nitrate_N_kg_per_ha	2012-02-01	150-180 cm	Urea	14.7896	a	a	a
EquivSeg_Nitrate_N_kg_per_ha	2012-11-16	0-7.6 cm	DM + A	14.9813	a	a	a
EquivSeg_Nitrate_N_kg_per_ha	2012-11-16	0-7.6 cm	DM	11.8358	a	a	a
EquivSeg_Nitrate_N_kg_per_ha	2012-11-16	0-7.6 cm	SU	10.1505	a	a	a
EquivSeg_Nitrate_N_kg_per_ha	2012-11-16	0-7.6 cm	Urea	9.99536	a	a	a
EquivSeg_Nitrate_N_kg_per_ha	2012-11-16	0-7.6 cm	Control	2.99365	a	a	a
EquivSeg_Nitrate_N_kg_per_ha	2012-11-16	7.6-15 cm	DM + A	14.7517	a	a	a
EquivSeg_Nitrate_N_kg_per_ha	2012-11-16	7.6-15 cm	SU	11.5708	a	ab	ab
EquivSeg_Nitrate_N_kg_per_ha	2012-11-16	7.6-15 cm	DM	9.41476	a	ab	ab
EquivSeg_Nitrate_N_kg_per_ha	2012-11-16	7.6-15 cm	Urea	6.36438	a	ab	ab
EquivSeg_Nitrate_N_kg_per_ha	2012-11-16	7.6-15 cm	Control	3.38882	a	b	b
EquivSeg_Nitrate_N_kg_per_ha	2012-11-16	15-30 cm	SU	18.3058	a	a	a
EquivSeg_Nitrate_N_kg_per_ha	2012-11-16	15-30 cm	DM + A	14.3014	a	a	a
EquivSeg_Nitrate_N_kg_per_ha	2012-11-16	15-30 cm	DM	10.0992	a	a	a
EquivSeg_Nitrate_N_kg_per_ha	2012-11-16	15-30 cm	Urea	9.91044	a	a	a
EquivSeg_Nitrate_N_kg_per_ha	2012-11-16	15-30 cm	Control	5.58347	a	a	a
EquivSeg_Nitrate_N_kg_per_ha	2012-11-16	30-61 cm	SU	17.5837	a	a	a
EquivSeg_Nitrate_N_kg_per_ha	2012-11-16	30-61 cm	Urea	10.5361	a	a	a
EquivSeg_Nitrate_N_kg_per_ha	2012-11-16	30-61 cm	DM + A	5.50537	a	a	a
EquivSeg_Nitrate_N_kg_per_ha	2012-11-16	30-61 cm	DM	5.40926	a	a	a
EquivSeg_Nitrate_N_kg_per_ha	2012-11-16	30-61 cm	Control	4.43983	a	a	a
EquivSeg_Nitrate_N_kg_per_ha	2012-11-16	61-91 cm	Urea	8.21196	a	a	a
EquivSeg_Nitrate_N_kg_per_ha	2012-11-16	61-91 cm	SU	7.76917	a	a	a
EquivSeg_Nitrate_N_kg_per_ha	2012-11-16	61-91 cm	DM + A	3.01387	a	a	a
EquivSeg_Nitrate_N_kg_per_ha	2012-11-16	61-91 cm	DM	2.87983	a	a	a
EquivSeg_Nitrate_N_kg_per_ha	2012-11-16	61-91 cm	Control	2.48364	a	a	a
EquivSeg_Nitrate_N_kg_per_ha	2012-11-16	91-120 cm	Urea	5.88597	a	a	a
EquivSeg_Nitrate_N_kg_per_ha	2012-11-16	91-120 cm	SU	3.28995	a	a	a
EquivSeg_Nitrate_N_kg_per_ha	2012-11-16	91-120 cm	DM + A	2.52282	a	a	a
EquivSeg_Nitrate_N_kg_per_ha	2012-11-16	91-120 cm	DM	2.41828	a	a	a
EquivSeg_Nitrate_N_kg_per_ha	2012-11-16	91-120 cm	Control	2.03117	a	a	a
EquivSeg_Nitrate_N_kg_per_ha	2012-11-16	120-150 cm	SU	9.34173	a	a	a
EquivSeg_Nitrate_N_kg_per_ha	2012-11-16	120-150 cm	DM	6.8184	a	a	a
EquivSeg_Nitrate_N_kg_per_ha	2012-11-16	120-150 cm	DM + A	6.75997	a	a	a
EquivSeg_Nitrate_N_kg_per_ha	2012-11-16	120-150 cm	Urea	5.73106	a	a	a
EquivSeg_Nitrate_N_kg_per_ha	2012-11-16	120-150 cm	Control	3.11108	a	a	a
EquivSeg_Nitrate_N_kg_per_ha	2012-11-16	150-180 cm	SU	19.6502	a	a	a
EquivSeg_Nitrate_N_kg_per_ha	2012-11-16	150-180 cm	DM	12.8882	a	a	a
EquivSeg_Nitrate_N_kg_per_ha	2012-11-16	150-180 cm	Control	10.7579	a	a	a
EquivSeg_Nitrate_N_kg_per_ha	2012-11-16	150-180 cm	DM + A	10.5348	a	a	a
EquivSeg_Nitrate_N_kg_per_ha	2012-11-16	150-180 cm	Urea	10.4588	a	a	a
EquivSeg_Nitrate_N_kg_per_ha	2013-03-11	0-7.6 cm	SU	20.0896	a	a	a
EquivSeg_Nitrate_N_kg_per_ha	2013-03-11	0-7.6 cm	DM	19.2297	a	a	a
EquivSeg_Nitrate_N_kg_per_ha	2013-03-11	0-7.6 cm	DM + A	11.1698	a	a	a
EquivSeg_Nitrate_N_kg_per_ha	2013-03-11	0-7.6 cm	Urea	8.97524	a	a	a
EquivSeg_Nitrate_N_kg_per_ha	2013-03-11	0-7.6 cm	Control	8.4119	a	a	a
EquivSeg_Nitrate_N_kg_per_ha	2013-03-11	7.6-15 cm	SU	13.0565	a	a	a
EquivSeg_Nitrate_N_kg_per_ha	2013-03-11	7.6-15 cm	DM	9.98289	a	a	a
EquivSeg_Nitrate_N_kg_per_ha	2013-03-11	7.6-15 cm	DM + A	8.56722	a	a	a
EquivSeg_Nitrate_N_kg_per_ha	2013-03-11	7.6-15 cm	Urea	6.27587	a	a	a
EquivSeg_Nitrate_N_kg_per_ha	2013-03-11	7.6-15 cm	Control	5.22632	a	a	a
EquivSeg_Nitrate_N_kg_per_ha	2013-03-11	15-30 cm	DM	13.6434	a	a	a
EquivSeg_Nitrate_N_kg_per_ha	2013-03-11	15-30 cm	SU	13.5644	a	a	a
EquivSeg_Nitrate_N_kg_per_ha	2013-03-11	15-30 cm	DM + A	11.1104	a	a	a
EquivSeg_Nitrate_N_kg_per_ha	2013-03-11	15-30 cm	Urea	9.27162	a	a	a
EquivSeg_Nitrate_N_kg_per_ha	2013-03-11	15-30 cm	Control	7.52198	a	a	a
EquivSeg_Nitrate_N_kg_per_ha	2013-03-11	30-61 cm	SU	14.3644	a	a	a
EquivSeg_Nitrate_N_kg_per_ha	2013-03-11	30-61 cm	DM	6.56187	a	ab	ab
EquivSeg_Nitrate_N_kg_per_ha	2013-03-11	30-61 cm	DM + A	5.73064	a	ab	b
EquivSeg_Nitrate_N_kg_per_ha	2013-03-11	30-61 cm	Urea	5.34125	a	ab	b
EquivSeg_Nitrate_N_kg_per_ha	2013-03-11	30-61 cm	Control	4.55023	a	b	b
EquivSeg_Nitrate_N_kg_per_ha	2013-03-11	61-91 cm	SU	4.45504	a	a	a
EquivSeg_Nitrate_N_kg_per_ha	2013-03-11	61-91 cm	DM + A	3.85437	a	a	a
EquivSeg_Nitrate_N_kg_per_ha	2013-03-11	61-91 cm	Urea	3.7272	a	a	a
EquivSeg_Nitrate_N_kg_per_ha	2013-03-11	61-91 cm	DM	3.712	a	a	a
EquivSeg_Nitrate_N_kg_per_ha	2013-03-11	61-91 cm	Control	3.69238	a	a	a
EquivSeg_Nitrate_N_kg_per_ha	2013-03-11	91-120 cm	SU	3.7586	a	a	a
EquivSeg_Nitrate_N_kg_per_ha	2013-03-11	91-120 cm	Control	3.6202	a	a	a
EquivSeg_Nitrate_N_kg_per_ha	2013-03-11	91-120 cm	Urea	3.435	a	a	a
EquivSeg_Nitrate_N_kg_per_ha	2013-03-11	91-120 cm	DM + A	3.27212	a	a	a
EquivSeg_Nitrate_N_kg_per_ha	2013-03-11	91-120 cm	DM	3.1759	a	a	a
EquivSeg_Nitrate_N_kg_per_ha	2013-03-11	120-150 cm	SU	10.4683	a	a	a
EquivSeg_Nitrate_N_kg_per_ha	2013-03-11	120-150 cm	DM + A	9.24206	a	a	a
EquivSeg_Nitrate_N_kg_per_ha	2013-03-11	120-150 cm	Urea	9.201	a	a	a
EquivSeg_Nitrate_N_kg_per_ha	2013-03-11	120-150 cm	DM	9.10231	a	a	a
EquivSeg_Nitrate_N_kg_per_ha	2013-03-11	120-150 cm	Control	5.59634	a	a	a
EquivSeg_Nitrate_N_kg_per_ha	2013-03-11	150-180 cm	SU	21.6688	a	a	a
EquivSeg_Nitrate_N_kg_per_ha	2013-03-11	150-180 cm	DM	18.2352	a	a	a
EquivSeg_Nitrate_N_kg_per_ha	2013-03-11	150-180 cm	Urea	15.5277	a	a	a
EquivSeg_Nitrate_N_kg_per_ha	2013-03-11	150-180 cm	DM + A	13.617	a	a	a
EquivSeg_Nitrate_N_kg_per_ha	2013-03-11	150-180 cm	Control	12.8859	a	a	a
EquivSeg_Nitrate_N_kg_per_ha	2013-11-08	0-7.6 cm	DM	13.6151	a	a	a
EquivSeg_Nitrate_N_kg_per_ha	2013-11-08	0-7.6 cm	DM + A	13.5214	a	a	a
EquivSeg_Nitrate_N_kg_per_ha	2013-11-08	0-7.6 cm	Urea	8.65783	ab	ab	ab
EquivSeg_Nitrate_N_kg_per_ha	2013-11-08	0-7.6 cm	SU	8.27747	ab	ab	ab
EquivSeg_Nitrate_N_kg_per_ha	2013-11-08	0-7.6 cm	Control	2.62358	b	b	b
EquivSeg_Nitrate_N_kg_per_ha	2013-11-08	7.6-15 cm	DM + A	13.3698	a	a	a
EquivSeg_Nitrate_N_kg_per_ha	2013-11-08	7.6-15 cm	DM	13.217	a	a	a
EquivSeg_Nitrate_N_kg_per_ha	2013-11-08	7.6-15 cm	Urea	10.5578	a	a	a
EquivSeg_Nitrate_N_kg_per_ha	2013-11-08	7.6-15 cm	SU	9.19248	ab	a	a
EquivSeg_Nitrate_N_kg_per_ha	2013-11-08	7.6-15 cm	Control	3.47638	b	b	b
EquivSeg_Nitrate_N_kg_per_ha	2013-11-08	15-30 cm	DM + A	19.0588	a	a	a
EquivSeg_Nitrate_N_kg_per_ha	2013-11-08	15-30 cm	Urea	18.086	a	a	a
EquivSeg_Nitrate_N_kg_per_ha	2013-11-08	15-30 cm	DM	16.4565	ab	a	a
EquivSeg_Nitrate_N_kg_per_ha	2013-11-08	15-30 cm	SU	16.1812	ab	a	a
EquivSeg_Nitrate_N_kg_per_ha	2013-11-08	15-30 cm	Control	4.48115	b	b	b
EquivSeg_Nitrate_N_kg_per_ha	2013-11-08	30-61 cm	Urea	24.9385	a	a	a
EquivSeg_Nitrate_N_kg_per_ha	2013-11-08	30-61 cm	SU	22.8983	a	a	a
EquivSeg_Nitrate_N_kg_per_ha	2013-11-08	30-61 cm	DM	16.1243	ab	a	a
EquivSeg_Nitrate_N_kg_per_ha	2013-11-08	30-61 cm	DM + A	14.3395	ab	ab	a
EquivSeg_Nitrate_N_kg_per_ha	2013-11-08	30-61 cm	Control	2.83299	b	b	b
EquivSeg_Nitrate_N_kg_per_ha	2013-11-08	61-91 cm	Urea	18.2101	a	a	a
EquivSeg_Nitrate_N_kg_per_ha	2013-11-08	61-91 cm	SU	16.5286	ab	ab	ab
EquivSeg_Nitrate_N_kg_per_ha	2013-11-08	61-91 cm	DM	10.8966	abc	ab	bc
EquivSeg_Nitrate_N_kg_per_ha	2013-11-08	61-91 cm	DM + A	9.44841	bc	bc	cd
EquivSeg_Nitrate_N_kg_per_ha	2013-11-08	61-91 cm	Control	2.79651	c	c	d
EquivSeg_Nitrate_N_kg_per_ha	2013-11-08	91-120 cm	Urea	11.6647	a	a	a
EquivSeg_Nitrate_N_kg_per_ha	2013-11-08	91-120 cm	SU	10.5417	a	a	a
EquivSeg_Nitrate_N_kg_per_ha	2013-11-08	91-120 cm	DM + A	6.80892	ab	ab	ab
EquivSeg_Nitrate_N_kg_per_ha	2013-11-08	91-120 cm	DM	5.94065	ab	ab	ab
EquivSeg_Nitrate_N_kg_per_ha	2013-11-08	91-120 cm	Control	1.80997	b	b	b
EquivSeg_Nitrate_N_kg_per_ha	2013-11-08	120-150 cm	SU	10.8663	a	a	a
EquivSeg_Nitrate_N_kg_per_ha	2013-11-08	120-150 cm	Urea	10.118	a	a	a
EquivSeg_Nitrate_N_kg_per_ha	2013-11-08	120-150 cm	DM + A	6.59581	a	a	a
EquivSeg_Nitrate_N_kg_per_ha	2013-11-08	120-150 cm	DM	4.93698	a	a	a
EquivSeg_Nitrate_N_kg_per_ha	2013-11-08	120-150 cm	Control	2.41722	a	a	a
EquivSeg_Nitrate_N_kg_per_ha	2013-11-08	150-180 cm	Urea	9.72884	a	a	a
EquivSeg_Nitrate_N_kg_per_ha	2013-11-08	150-180 cm	SU	8.70972	a	a	ab
EquivSeg_Nitrate_N_kg_per_ha	2013-11-08	150-180 cm	DM + A	5.30783	a	a	ab
EquivSeg_Nitrate_N_kg_per_ha	2013-11-08	150-180 cm	DM	3.78122	a	a	ab
EquivSeg_Nitrate_N_kg_per_ha	2013-11-08	150-180 cm	Control	2.32211	a	a	b
EquivSeg_Nitrate_N_kg_per_ha	2014-03-21	0-7.6 cm	DM	9.12382	a	a	a
EquivSeg_Nitrate_N_kg_per_ha	2014-03-21	0-7.6 cm	SU	8.44401	a	a	a
EquivSeg_Nitrate_N_kg_per_ha	2014-03-21	0-7.6 cm	DM + A	7.39754	a	a	a
EquivSeg_Nitrate_N_kg_per_ha	2014-03-21	0-7.6 cm	Control	6.39283	a	a	a
EquivSeg_Nitrate_N_kg_per_ha	2014-03-21	0-7.6 cm	Urea	6.10693	a	a	a
EquivSeg_Nitrate_N_kg_per_ha	2014-03-21	7.6-15 cm	DM	13.2126	a	a	a
EquivSeg_Nitrate_N_kg_per_ha	2014-03-21	7.6-15 cm	SU	12.4233	a	ab	a
EquivSeg_Nitrate_N_kg_per_ha	2014-03-21	7.6-15 cm	DM + A	11.0755	a	ab	ab
EquivSeg_Nitrate_N_kg_per_ha	2014-03-21	7.6-15 cm	Urea	8.81211	a	ab	ab
EquivSeg_Nitrate_N_kg_per_ha	2014-03-21	7.6-15 cm	Control	6.18406	a	b	b
EquivSeg_Nitrate_N_kg_per_ha	2014-03-21	15-30 cm	DM	26.7314	a	a	a
EquivSeg_Nitrate_N_kg_per_ha	2014-03-21	15-30 cm	DM + A	26.3535	a	a	a
EquivSeg_Nitrate_N_kg_per_ha	2014-03-21	15-30 cm	SU	25.0072	a	ab	a
EquivSeg_Nitrate_N_kg_per_ha	2014-03-21	15-30 cm	Urea	20.9635	a	ab	ab
EquivSeg_Nitrate_N_kg_per_ha	2014-03-21	15-30 cm	Control	11.1641	a	b	b
EquivSeg_Nitrate_N_kg_per_ha	2014-03-21	30-61 cm	SU	39.2328	a	a	a
EquivSeg_Nitrate_N_kg_per_ha	2014-03-21	30-61 cm	DM + A	31.7684	ab	ab	ab
EquivSeg_Nitrate_N_kg_per_ha	2014-03-21	30-61 cm	Urea	31.2201	ab	ab	ab
EquivSeg_Nitrate_N_kg_per_ha	2014-03-21	30-61 cm	DM	25.9835	ab	ab	ab
EquivSeg_Nitrate_N_kg_per_ha	2014-03-21	30-61 cm	Control	5.68558	b	b	b
EquivSeg_Nitrate_N_kg_per_ha	2014-03-21	61-91 cm	SU	37.8417	a	a	a
EquivSeg_Nitrate_N_kg_per_ha	2014-03-21	61-91 cm	DM + A	23.6184	ab	ab	ab
EquivSeg_Nitrate_N_kg_per_ha	2014-03-21	61-91 cm	Urea	22.3487	ab	abc	ab
EquivSeg_Nitrate_N_kg_per_ha	2014-03-21	61-91 cm	DM	13.7802	b	bc	bc
EquivSeg_Nitrate_N_kg_per_ha	2014-03-21	61-91 cm	Control	3.51648	b	c	c
EquivSeg_Nitrate_N_kg_per_ha	2014-03-21	91-120 cm	SU	23.7233	a	a	a
EquivSeg_Nitrate_N_kg_per_ha	2014-03-21	91-120 cm	Urea	13.7452	ab	ab	ab
EquivSeg_Nitrate_N_kg_per_ha	2014-03-21	91-120 cm	DM + A	13.4536	ab	ab	ab
EquivSeg_Nitrate_N_kg_per_ha	2014-03-21	91-120 cm	DM	8.02648	b	b	b
EquivSeg_Nitrate_N_kg_per_ha	2014-03-21	91-120 cm	Control	2.79454	b	b	b
EquivSeg_Nitrate_N_kg_per_ha	2014-03-21	120-150 cm	SU	18.9563	a	a	a
EquivSeg_Nitrate_N_kg_per_ha	2014-03-21	120-150 cm	Urea	11.0333	ab	ab	ab
EquivSeg_Nitrate_N_kg_per_ha	2014-03-21	120-150 cm	DM + A	10.3332	ab	ab	ab
EquivSeg_Nitrate_N_kg_per_ha	2014-03-21	120-150 cm	DM	8.29363	ab	ab	ab
EquivSeg_Nitrate_N_kg_per_ha	2014-03-21	120-150 cm	Control	3.21594	b	b	b
EquivSeg_Nitrate_N_kg_per_ha	2014-03-21	150-180 cm	SU	13.4552	a	a	a
EquivSeg_Nitrate_N_kg_per_ha	2014-03-21	150-180 cm	DM + A	9.60724	a	ab	ab
EquivSeg_Nitrate_N_kg_per_ha	2014-03-21	150-180 cm	Urea	9.04015	a	ab	ab
EquivSeg_Nitrate_N_kg_per_ha	2014-03-21	150-180 cm	DM	6.75146	a	ab	ab
EquivSeg_Nitrate_N_kg_per_ha	2014-03-21	150-180 cm	Control	2.96424	a	b	b
EquivSeg_Nitrate_N_kg_per_ha	2014-10-30	0-7.6 cm	Urea	67.029	a	a	a
EquivSeg_Nitrate_N_kg_per_ha	2014-10-30	0-7.6 cm	SU	21.666	a	ab	ab
EquivSeg_Nitrate_N_kg_per_ha	2014-10-30	0-7.6 cm	DM	16.8279	a	ab	ab
EquivSeg_Nitrate_N_kg_per_ha	2014-10-30	0-7.6 cm	DM + A	14.7602	a	ab	ab
EquivSeg_Nitrate_N_kg_per_ha	2014-10-30	0-7.6 cm	Control	3.22898	a	b	b
EquivSeg_Nitrate_N_kg_per_ha	2014-10-30	7.6-15 cm	Urea	56.5426	a	a	a
EquivSeg_Nitrate_N_kg_per_ha	2014-10-30	7.6-15 cm	SU	24.2673	ab	ab	ab
EquivSeg_Nitrate_N_kg_per_ha	2014-10-30	7.6-15 cm	DM	19.0812	ab	ab	b
EquivSeg_Nitrate_N_kg_per_ha	2014-10-30	7.6-15 cm	DM + A	18.8052	ab	ab	b
EquivSeg_Nitrate_N_kg_per_ha	2014-10-30	7.6-15 cm	Control	3.57168	b	b	b
EquivSeg_Nitrate_N_kg_per_ha	2014-10-30	15-30 cm	Urea	48.1171	a	a	a
EquivSeg_Nitrate_N_kg_per_ha	2014-10-30	15-30 cm	SU	33.9881	ab	ab	ab
EquivSeg_Nitrate_N_kg_per_ha	2014-10-30	15-30 cm	DM	30.4075	ab	ab	ab
EquivSeg_Nitrate_N_kg_per_ha	2014-10-30	15-30 cm	DM + A	27.0403	ab	ab	ab
EquivSeg_Nitrate_N_kg_per_ha	2014-10-30	15-30 cm	Control	6.40954	b	b	b
EquivSeg_Nitrate_N_kg_per_ha	2014-10-30	30-61 cm	SU	42.8838	a	a	a
EquivSeg_Nitrate_N_kg_per_ha	2014-10-30	30-61 cm	Urea	35.7628	ab	a	a
EquivSeg_Nitrate_N_kg_per_ha	2014-10-30	30-61 cm	DM	23.751	ab	ab	ab
EquivSeg_Nitrate_N_kg_per_ha	2014-10-30	30-61 cm	DM + A	21.9674	ab	ab	ab
EquivSeg_Nitrate_N_kg_per_ha	2014-10-30	30-61 cm	Control	6.34468	b	b	b
EquivSeg_Nitrate_N_kg_per_ha	2014-10-30	61-91 cm	SU	36.4594	a	a	a
EquivSeg_Nitrate_N_kg_per_ha	2014-10-30	61-91 cm	Urea	32.3483	a	ab	ab
EquivSeg_Nitrate_N_kg_per_ha	2014-10-30	61-91 cm	DM	13.9554	ab	abc	bc
EquivSeg_Nitrate_N_kg_per_ha	2014-10-30	61-91 cm	DM + A	13.2378	ab	bc	bc
EquivSeg_Nitrate_N_kg_per_ha	2014-10-30	61-91 cm	Control	5.75089	b	c	c
EquivSeg_Nitrate_N_kg_per_ha	2014-10-30	91-120 cm	SU	21.6416	a	a	a
EquivSeg_Nitrate_N_kg_per_ha	2014-10-30	91-120 cm	Urea	21.0823	a	a	a
EquivSeg_Nitrate_N_kg_per_ha	2014-10-30	91-120 cm	DM + A	10.9099	a	ab	ab
EquivSeg_Nitrate_N_kg_per_ha	2014-10-30	91-120 cm	DM	9.51999	a	ab	ab
EquivSeg_Nitrate_N_kg_per_ha	2014-10-30	91-120 cm	Control	4.31618	a	b	b
EquivSeg_Nitrate_N_kg_per_ha	2014-10-30	120-150 cm	Urea	21.3902	a	a	a
EquivSeg_Nitrate_N_kg_per_ha	2014-10-30	120-150 cm	SU	20.0019	ab	a	a
EquivSeg_Nitrate_N_kg_per_ha	2014-10-30	120-150 cm	DM + A	12.7365	ab	ab	ab
EquivSeg_Nitrate_N_kg_per_ha	2014-10-30	120-150 cm	DM	10.5417	ab	ab	ab
EquivSeg_Nitrate_N_kg_per_ha	2014-10-30	120-150 cm	Control	5.71226	b	b	b
EquivSeg_Nitrate_N_kg_per_ha	2014-10-30	150-180 cm	Urea	22.0425	a	a	a
EquivSeg_Nitrate_N_kg_per_ha	2014-10-30	150-180 cm	SU	20.9302	a	ab	a
EquivSeg_Nitrate_N_kg_per_ha	2014-10-30	150-180 cm	DM + A	12.3713	a	ab	ab
EquivSeg_Nitrate_N_kg_per_ha	2014-10-30	150-180 cm	DM	8.93912	a	ab	ab
EquivSeg_Nitrate_N_kg_per_ha	2014-10-30	150-180 cm	Control	6.11409	a	b	b
EquivSeg_Nitrate_N_kg_per_ha	2015-03-20	0-7.6 cm	DM	32.6614	a	a	a
EquivSeg_Nitrate_N_kg_per_ha	2015-03-20	0-7.6 cm	Urea	28.7238	ab	a	a
EquivSeg_Nitrate_N_kg_per_ha	2015-03-20	0-7.6 cm	DM + A	27.9609	ab	ab	a
EquivSeg_Nitrate_N_kg_per_ha	2015-03-20	0-7.6 cm	SU	26.6527	ab	ab	ab
EquivSeg_Nitrate_N_kg_per_ha	2015-03-20	0-7.6 cm	Control	7.65539	b	b	b
EquivSeg_Nitrate_N_kg_per_ha	2015-03-20	7.6-15 cm	DM + A	24.5098	a	a	a
EquivSeg_Nitrate_N_kg_per_ha	2015-03-20	7.6-15 cm	DM	22.569	a	a	a
EquivSeg_Nitrate_N_kg_per_ha	2015-03-20	7.6-15 cm	SU	15.4748	ab	ab	ab
EquivSeg_Nitrate_N_kg_per_ha	2015-03-20	7.6-15 cm	Urea	13.8921	ab	ab	ab
EquivSeg_Nitrate_N_kg_per_ha	2015-03-20	7.6-15 cm	Control	5.26973	b	b	b
EquivSeg_Nitrate_N_kg_per_ha	2015-03-20	15-30 cm	DM	29.3597	a	a	a
EquivSeg_Nitrate_N_kg_per_ha	2015-03-20	15-30 cm	DM + A	27.0207	ab	a	a
EquivSeg_Nitrate_N_kg_per_ha	2015-03-20	15-30 cm	SU	22.7753	ab	ab	ab
EquivSeg_Nitrate_N_kg_per_ha	2015-03-20	15-30 cm	Urea	22.189	ab	ab	ab
EquivSeg_Nitrate_N_kg_per_ha	2015-03-20	15-30 cm	Control	7.24643	b	b	b
EquivSeg_Nitrate_N_kg_per_ha	2015-03-20	30-61 cm	Urea	29.8144	a	a	a
EquivSeg_Nitrate_N_kg_per_ha	2015-03-20	30-61 cm	SU	29.2419	a	a	a
EquivSeg_Nitrate_N_kg_per_ha	2015-03-20	30-61 cm	DM	23.5692	a	ab	ab
EquivSeg_Nitrate_N_kg_per_ha	2015-03-20	30-61 cm	DM + A	19.8832	a	ab	ab
EquivSeg_Nitrate_N_kg_per_ha	2015-03-20	30-61 cm	Control	4.05194	a	b	b
EquivSeg_Nitrate_N_kg_per_ha	2015-03-20	61-91 cm	SU	33.8375	a	a	a
EquivSeg_Nitrate_N_kg_per_ha	2015-03-20	61-91 cm	Urea	30.3896	ab	ab	a
EquivSeg_Nitrate_N_kg_per_ha	2015-03-20	61-91 cm	DM + A	14.8838	bc	bc	b
EquivSeg_Nitrate_N_kg_per_ha	2015-03-20	61-91 cm	DM	12.2886	bc	c	b
EquivSeg_Nitrate_N_kg_per_ha	2015-03-20	61-91 cm	Control	3.67561	c	c	b
EquivSeg_Nitrate_N_kg_per_ha	2015-03-20	91-120 cm	SU	30.4133	a	a	a
EquivSeg_Nitrate_N_kg_per_ha	2015-03-20	91-120 cm	Urea	26.7929	a	a	ab
EquivSeg_Nitrate_N_kg_per_ha	2015-03-20	91-120 cm	DM + A	15.2612	ab	ab	abc
EquivSeg_Nitrate_N_kg_per_ha	2015-03-20	91-120 cm	DM	11.1781	ab	ab	bc
EquivSeg_Nitrate_N_kg_per_ha	2015-03-20	91-120 cm	Control	2.93373	b	b	c
EquivSeg_Nitrate_N_kg_per_ha	2015-03-20	120-150 cm	SU	30.8307	a	a	a
EquivSeg_Nitrate_N_kg_per_ha	2015-03-20	120-150 cm	Urea	25.8279	ab	ab	a
EquivSeg_Nitrate_N_kg_per_ha	2015-03-20	120-150 cm	DM + A	19.3672	ab	ab	ab
EquivSeg_Nitrate_N_kg_per_ha	2015-03-20	120-150 cm	DM	13.1878	ab	ab	ab
EquivSeg_Nitrate_N_kg_per_ha	2015-03-20	120-150 cm	Control	5.75031	b	b	b
EquivSeg_Nitrate_N_kg_per_ha	2015-03-20	150-180 cm	SU	27.1006	a	a	a
EquivSeg_Nitrate_N_kg_per_ha	2015-03-20	150-180 cm	Urea	23.0433	ab	ab	a
EquivSeg_Nitrate_N_kg_per_ha	2015-03-20	150-180 cm	DM + A	19.061	ab	ab	ab
EquivSeg_Nitrate_N_kg_per_ha	2015-03-20	150-180 cm	DM	17.6765	ab	ab	ab
EquivSeg_Nitrate_N_kg_per_ha	2015-03-20	150-180 cm	Control	5.22109	b	b	b
EquivSeg_Nitrate_N_kg_per_ha	2015-11-24	0-7.6 cm	Urea	17.3255	a	a	a
EquivSeg_Nitrate_N_kg_per_ha	2015-11-24	0-7.6 cm	DM + A	5.66345	a	a	a
EquivSeg_Nitrate_N_kg_per_ha	2015-11-24	0-7.6 cm	DM	5.57371	a	a	a
EquivSeg_Nitrate_N_kg_per_ha	2015-11-24	0-7.6 cm	SU	3.93702	a	a	a
EquivSeg_Nitrate_N_kg_per_ha	2015-11-24	0-7.6 cm	Control	1.65653	a	a	a
EquivSeg_Nitrate_N_kg_per_ha	2015-11-24	7.6-15 cm	Urea	13.9238	a	a	a
EquivSeg_Nitrate_N_kg_per_ha	2015-11-24	7.6-15 cm	DM + A	9.23987	a	a	a
EquivSeg_Nitrate_N_kg_per_ha	2015-11-24	7.6-15 cm	DM	9.15828	a	a	a
EquivSeg_Nitrate_N_kg_per_ha	2015-11-24	7.6-15 cm	SU	7.66238	a	a	a
EquivSeg_Nitrate_N_kg_per_ha	2015-11-24	7.6-15 cm	Control	2.3001	a	a	a
EquivSeg_Nitrate_N_kg_per_ha	2015-11-24	15-30 cm	SU	25.6249	a	a	a
EquivSeg_Nitrate_N_kg_per_ha	2015-11-24	15-30 cm	Urea	20.3679	a	a	a
EquivSeg_Nitrate_N_kg_per_ha	2015-11-24	15-30 cm	DM	17.7702	a	a	a
EquivSeg_Nitrate_N_kg_per_ha	2015-11-24	15-30 cm	DM + A	14.0406	a	a	a
EquivSeg_Nitrate_N_kg_per_ha	2015-11-24	15-30 cm	Control	4.43093	a	a	a
EquivSeg_Nitrate_N_kg_per_ha	2015-11-24	30-61 cm	SU	25.6154	a	a	a
EquivSeg_Nitrate_N_kg_per_ha	2015-11-24	30-61 cm	DM + A	23.3952	a	a	a
EquivSeg_Nitrate_N_kg_per_ha	2015-11-24	30-61 cm	DM	17.9312	a	a	a
EquivSeg_Nitrate_N_kg_per_ha	2015-11-24	30-61 cm	Urea	17.3538	a	a	a
EquivSeg_Nitrate_N_kg_per_ha	2015-11-24	30-61 cm	Control	4.07586	a	a	a
EquivSeg_Nitrate_N_kg_per_ha	2015-11-24	61-91 cm	SU	16.4892	a	a	a
EquivSeg_Nitrate_N_kg_per_ha	2015-11-24	61-91 cm	Urea	15.8915	a	a	a
EquivSeg_Nitrate_N_kg_per_ha	2015-11-24	61-91 cm	DM	14.077	a	a	a
EquivSeg_Nitrate_N_kg_per_ha	2015-11-24	61-91 cm	DM + A	12.9697	a	a	a
EquivSeg_Nitrate_N_kg_per_ha	2015-11-24	61-91 cm	Control	2.123	a	a	a
EquivSeg_Nitrate_N_kg_per_ha	2015-11-24	91-120 cm	DM	24.6988	a	a	a
EquivSeg_Nitrate_N_kg_per_ha	2015-11-24	91-120 cm	SU	20.8461	a	a	a
EquivSeg_Nitrate_N_kg_per_ha	2015-11-24	91-120 cm	Urea	14.9754	a	a	a
EquivSeg_Nitrate_N_kg_per_ha	2015-11-24	91-120 cm	DM + A	10.2626	a	a	a
EquivSeg_Nitrate_N_kg_per_ha	2015-11-24	91-120 cm	Control	1.63038	a	a	a
EquivSeg_Nitrate_N_kg_per_ha	2016-04-07	0-30 cm	DM + A	61.9915	a	a	a
EquivSeg_Nitrate_N_kg_per_ha	2016-04-07	0-30 cm	DM	43.4434	ab	ab	ab
EquivSeg_Nitrate_N_kg_per_ha	2016-04-07	0-30 cm	SU	31.3325	ab	ab	ab
EquivSeg_Nitrate_N_kg_per_ha	2016-04-07	0-30 cm	Urea	30.0207	ab	ab	ab
EquivSeg_Nitrate_N_kg_per_ha	2016-04-07	0-30 cm	Control	15.5936	b	b	b
EquivSeg_Nitrate_N_kg_per_ha	2016-04-07	30-61 cm	DM + A	30.6285	a	a	a
EquivSeg_Nitrate_N_kg_per_ha	2016-04-07	30-61 cm	SU	29.7873	a	a	a
EquivSeg_Nitrate_N_kg_per_ha	2016-04-07	30-61 cm	DM	25.7059	a	ab	ab
EquivSeg_Nitrate_N_kg_per_ha	2016-04-07	30-61 cm	Urea	15.8854	a	ab	ab
EquivSeg_Nitrate_N_kg_per_ha	2016-04-07	30-61 cm	Control	10.066	a	b	b
EquivSeg_Nitrate_N_kg_per_ha	2016-04-07	61-91 cm	DM	20.0749	a	a	a
EquivSeg_Nitrate_N_kg_per_ha	2016-04-07	61-91 cm	SU	19.8427	a	a	a
EquivSeg_Nitrate_N_kg_per_ha	2016-04-07	61-91 cm	DM + A	19.837	a	a	a
EquivSeg_Nitrate_N_kg_per_ha	2016-04-07	61-91 cm	Urea	10.3928	a	a	a
EquivSeg_Nitrate_N_kg_per_ha	2016-04-07	61-91 cm	Control	6.82334	a	a	a
EquivSeg_Nitrate_N_kg_per_ha	2016-11-16	0-7.6 cm	SU	27.2295	a	a	a
EquivSeg_Nitrate_N_kg_per_ha	2016-11-16	0-7.6 cm	DM	6.39837	a	a	a
EquivSeg_Nitrate_N_kg_per_ha	2016-11-16	0-7.6 cm	Urea	5.76105	a	a	a
EquivSeg_Nitrate_N_kg_per_ha	2016-11-16	0-7.6 cm	DM + A	5.36799	a	a	a
EquivSeg_Nitrate_N_kg_per_ha	2016-11-16	0-7.6 cm	Control	3.83071	a	a	a
EquivSeg_Nitrate_N_kg_per_ha	2016-11-16	7.6-15 cm	SU	13.4355	a	a	a
EquivSeg_Nitrate_N_kg_per_ha	2016-11-16	7.6-15 cm	DM	5.58405	a	a	a
EquivSeg_Nitrate_N_kg_per_ha	2016-11-16	7.6-15 cm	DM + A	4.87754	a	a	a
EquivSeg_Nitrate_N_kg_per_ha	2016-11-16	7.6-15 cm	Control	3.48242	a	a	a
EquivSeg_Nitrate_N_kg_per_ha	2016-11-16	7.6-15 cm	Urea	3.31697	a	a	a
EquivSeg_Nitrate_N_kg_per_ha	2016-11-16	15-30 cm	SU	9.48258	a	a	a
EquivSeg_Nitrate_N_kg_per_ha	2016-11-16	15-30 cm	DM + A	6.21806	a	a	a
EquivSeg_Nitrate_N_kg_per_ha	2016-11-16	15-30 cm	DM	5.5495	a	a	a
EquivSeg_Nitrate_N_kg_per_ha	2016-11-16	15-30 cm	Urea	4.71991	a	a	a
EquivSeg_Nitrate_N_kg_per_ha	2016-11-16	15-30 cm	Control	4.47383	a	a	a
EquivSeg_Nitrate_N_kg_per_ha	2016-11-16	30-61 cm	SU	17.1027	a	a	a
EquivSeg_Nitrate_N_kg_per_ha	2016-11-16	30-61 cm	Urea	6.67099	a	a	a
EquivSeg_Nitrate_N_kg_per_ha	2016-11-16	30-61 cm	DM	6.14682	a	a	a
EquivSeg_Nitrate_N_kg_per_ha	2016-11-16	30-61 cm	DM + A	5.75154	a	a	a
EquivSeg_Nitrate_N_kg_per_ha	2016-11-16	30-61 cm	Control	4.80422	a	a	a
EquivSeg_Nitrate_N_kg_per_ha	2016-11-16	61-91 cm	SU	12.051	a	a	a
EquivSeg_Nitrate_N_kg_per_ha	2016-11-16	61-91 cm	Urea	6.37325	a	a	a
EquivSeg_Nitrate_N_kg_per_ha	2016-11-16	61-91 cm	DM	4.45285	a	a	a
EquivSeg_Nitrate_N_kg_per_ha	2016-11-16	61-91 cm	Control	4.29595	a	a	a
EquivSeg_Nitrate_N_kg_per_ha	2016-11-16	61-91 cm	DM + A	3.96408	a	a	a
EquivSeg_Nitrate_N_kg_per_ha	2016-11-16	91-120 cm	SU	20.4712	a	a	a
EquivSeg_Nitrate_N_kg_per_ha	2016-11-16	91-120 cm	Urea	9.86619	a	a	a
EquivSeg_Nitrate_N_kg_per_ha	2016-11-16	91-120 cm	DM	5.3506	a	a	a
EquivSeg_Nitrate_N_kg_per_ha	2016-11-16	91-120 cm	DM + A	4.84644	a	a	a
EquivSeg_Nitrate_N_kg_per_ha	2016-11-16	91-120 cm	Control	3.41944	a	a	a
EquivSeg_Nitrate_N_kg_per_ha	2016-11-16	120-150 cm	Urea	31.0648	a	a	a
EquivSeg_Nitrate_N_kg_per_ha	2016-11-16	120-150 cm	SU	25.3663	ab	ab	a
EquivSeg_Nitrate_N_kg_per_ha	2016-11-16	120-150 cm	DM + A	18.9645	ab	ab	ab
EquivSeg_Nitrate_N_kg_per_ha	2016-11-16	120-150 cm	DM	15.281	ab	ab	ab
EquivSeg_Nitrate_N_kg_per_ha	2016-11-16	120-150 cm	Control	4.21482	b	b	b
EquivSeg_Nitrate_N_kg_per_ha	2017-03-27	0-7.6 cm	SU	11.6458	a	a	a
EquivSeg_Nitrate_N_kg_per_ha	2017-03-27	0-7.6 cm	DM + SU	9.86684	a	a	a
EquivSeg_Nitrate_N_kg_per_ha	2017-03-27	0-7.6 cm	DM	9.71292	a	a	a
EquivSeg_Nitrate_N_kg_per_ha	2017-03-27	0-7.6 cm	Urea	8.81725	a	a	a
EquivSeg_Nitrate_N_kg_per_ha	2017-03-27	0-7.6 cm	Control	6.45757	a	a	a
EquivSeg_Nitrate_N_kg_per_ha	2017-03-27	7.6-15 cm	SU	8.57296	a	a	a
EquivSeg_Nitrate_N_kg_per_ha	2017-03-27	7.6-15 cm	DM + SU	6.9648	ab	ab	ab
EquivSeg_Nitrate_N_kg_per_ha	2017-03-27	7.6-15 cm	DM	6.56905	ab	ab	ab
EquivSeg_Nitrate_N_kg_per_ha	2017-03-27	7.6-15 cm	Urea	4.9674	ab	b	b
EquivSeg_Nitrate_N_kg_per_ha	2017-03-27	7.6-15 cm	Control	4.51868	b	b	b
EquivSeg_Nitrate_N_kg_per_ha	2017-03-27	15-30 cm	SU	9.32676	a	a	a
EquivSeg_Nitrate_N_kg_per_ha	2017-03-27	15-30 cm	DM	7.3897	ab	ab	ab
EquivSeg_Nitrate_N_kg_per_ha	2017-03-27	15-30 cm	DM + SU	6.37785	ab	ab	ab
EquivSeg_Nitrate_N_kg_per_ha	2017-03-27	15-30 cm	Urea	5.51472	ab	b	b
EquivSeg_Nitrate_N_kg_per_ha	2017-03-27	15-30 cm	Control	5.06235	b	b	b
EquivSeg_Nitrate_N_kg_per_ha	2017-03-27	30-61 cm	SU	11.4155	a	a	a
EquivSeg_Nitrate_N_kg_per_ha	2017-03-27	30-61 cm	DM + SU	5.59671	a	a	a
EquivSeg_Nitrate_N_kg_per_ha	2017-03-27	30-61 cm	DM	5.41967	a	a	a
EquivSeg_Nitrate_N_kg_per_ha	2017-03-27	30-61 cm	Urea	4.61844	a	a	a
EquivSeg_Nitrate_N_kg_per_ha	2017-03-27	30-61 cm	Control	3.66302	a	a	a
EquivSeg_Nitrate_N_kg_per_ha	2017-03-27	61-91 cm	SU	14.7637	a	a	a
EquivSeg_Nitrate_N_kg_per_ha	2017-03-27	61-91 cm	DM + SU	5.58875	a	a	a
EquivSeg_Nitrate_N_kg_per_ha	2017-03-27	61-91 cm	Urea	4.94005	a	a	a
EquivSeg_Nitrate_N_kg_per_ha	2017-03-27	61-91 cm	DM	4.29583	a	a	a
EquivSeg_Nitrate_N_kg_per_ha	2017-03-27	61-91 cm	Control	3.31025	a	a	a
EquivSeg_Nitrate_N_kg_per_ha	2017-03-27	91-120 cm	SU	23.4023	a	a	a
EquivSeg_Nitrate_N_kg_per_ha	2017-03-27	91-120 cm	Urea	10.5922	ab	ab	b
EquivSeg_Nitrate_N_kg_per_ha	2017-03-27	91-120 cm	DM + SU	5.65978	b	b	b
EquivSeg_Nitrate_N_kg_per_ha	2017-03-27	91-120 cm	DM	4.02706	b	b	b
EquivSeg_Nitrate_N_kg_per_ha	2017-03-27	91-120 cm	Control	2.88575	b	b	b
EquivSeg_Nitrate_N_kg_per_ha	2017-11-13	0-7.6 cm	Urea	10.1587	a	a	a
EquivSeg_Nitrate_N_kg_per_ha	2017-11-13	0-7.6 cm	DM + SU	7.78955	a	a	a
EquivSeg_Nitrate_N_kg_per_ha	2017-11-13	0-7.6 cm	SU	6.21537	a	a	a
EquivSeg_Nitrate_N_kg_per_ha	2017-11-13	0-7.6 cm	DM	6.01876	a	a	a
EquivSeg_Nitrate_N_kg_per_ha	2017-11-13	0-7.6 cm	Control	2.20314	a	a	a
EquivSeg_Nitrate_N_kg_per_ha	2017-11-13	7.6-15 cm	DM + SU	9.74617	a	a	a
EquivSeg_Nitrate_N_kg_per_ha	2017-11-13	7.6-15 cm	DM	8.41285	a	ab	ab
EquivSeg_Nitrate_N_kg_per_ha	2017-11-13	7.6-15 cm	Urea	6.452	a	ab	ab
EquivSeg_Nitrate_N_kg_per_ha	2017-11-13	7.6-15 cm	SU	4.56181	a	ab	ab
EquivSeg_Nitrate_N_kg_per_ha	2017-11-13	7.6-15 cm	Control	2.30554	a	b	b
EquivSeg_Nitrate_N_kg_per_ha	2017-11-13	15-30 cm	DM + SU	9.21811	a	a	a
EquivSeg_Nitrate_N_kg_per_ha	2017-11-13	15-30 cm	DM	8.71155	a	a	a
EquivSeg_Nitrate_N_kg_per_ha	2017-11-13	15-30 cm	Urea	8.05653	ab	a	a
EquivSeg_Nitrate_N_kg_per_ha	2017-11-13	15-30 cm	SU	6.24379	ab	ab	ab
EquivSeg_Nitrate_N_kg_per_ha	2017-11-13	15-30 cm	Control	3.00404	b	b	b
EquivSeg_Nitrate_N_kg_per_ha	2017-11-13	30-61 cm	SU	7.1652	a	a	a
EquivSeg_Nitrate_N_kg_per_ha	2017-11-13	30-61 cm	Urea	6.99944	a	a	ab
EquivSeg_Nitrate_N_kg_per_ha	2017-11-13	30-61 cm	DM	4.38034	ab	ab	abc
EquivSeg_Nitrate_N_kg_per_ha	2017-11-13	30-61 cm	DM + SU	3.54872	ab	ab	bc
EquivSeg_Nitrate_N_kg_per_ha	2017-11-13	30-61 cm	Control	1.78959	b	b	c
EquivSeg_Nitrate_N_kg_per_ha	2017-11-13	61-91 cm	SU	6.90982	a	a	a
EquivSeg_Nitrate_N_kg_per_ha	2017-11-13	61-91 cm	Urea	3.4126	a	ab	ab
EquivSeg_Nitrate_N_kg_per_ha	2017-11-13	61-91 cm	DM	1.97581	a	ab	ab
EquivSeg_Nitrate_N_kg_per_ha	2017-11-13	61-91 cm	DM + SU	1.96181	a	ab	ab
EquivSeg_Nitrate_N_kg_per_ha	2017-11-13	61-91 cm	Control	0.963254	a	b	b
EquivSeg_Nitrate_N_kg_per_ha	2017-11-13	91-120 cm	SU	7.93549	a	a	a
EquivSeg_Nitrate_N_kg_per_ha	2017-11-13	91-120 cm	Urea	2.16418	a	a	ab
EquivSeg_Nitrate_N_kg_per_ha	2017-11-13	91-120 cm	DM + SU	1.84333	a	a	ab
EquivSeg_Nitrate_N_kg_per_ha	2017-11-13	91-120 cm	DM	1.26227	a	a	ab
EquivSeg_Nitrate_N_kg_per_ha	2017-11-13	91-120 cm	Control	0.792681	a	a	b
EquivSeg_Nitrate_N_kg_per_ha	2017-11-13	120-150 cm	SU	24.5951	a	a	a
EquivSeg_Nitrate_N_kg_per_ha	2017-11-13	120-150 cm	Urea	5.58026	a	a	a
EquivSeg_Nitrate_N_kg_per_ha	2017-11-13	120-150 cm	DM	1.87118	a	a	a
EquivSeg_Nitrate_N_kg_per_ha	2017-11-13	120-150 cm	Control	1.0978	a	a	a
EquivSeg_Organic_C_kg_per_ha	2012-02-01	0-7.6 cm	SU	13011	a	a	a
EquivSeg_Organic_C_kg_per_ha	2012-02-01	0-7.6 cm	Urea	12684.9	a	a	a
EquivSeg_Organic_C_kg_per_ha	2012-02-01	0-7.6 cm	DM	12575	a	a	a
EquivSeg_Organic_C_kg_per_ha	2012-02-01	0-7.6 cm	DM + A	12523.1	a	a	a
EquivSeg_Organic_C_kg_per_ha	2012-02-01	0-7.6 cm	Control	11934.5	a	a	a
EquivSeg_Organic_C_kg_per_ha	2012-02-01	7.6-15 cm	SU	11543.1	a	a	a
EquivSeg_Organic_C_kg_per_ha	2012-02-01	7.6-15 cm	DM	11291.8	a	a	a
EquivSeg_Organic_C_kg_per_ha	2012-02-01	7.6-15 cm	DM + A	11005.3	a	a	a
EquivSeg_Organic_C_kg_per_ha	2012-02-01	7.6-15 cm	Control	11004	a	a	a
EquivSeg_Organic_C_kg_per_ha	2012-02-01	7.6-15 cm	Urea	10802	a	a	a
EquivSeg_Organic_C_kg_per_ha	2012-02-01	15-30 cm	Control	22806.7	a	a	a
EquivSeg_Organic_C_kg_per_ha	2012-02-01	15-30 cm	Urea	21504.9	a	a	a
EquivSeg_Organic_C_kg_per_ha	2012-02-01	15-30 cm	DM	21362.9	a	a	a
EquivSeg_Organic_C_kg_per_ha	2012-02-01	15-30 cm	DM + A	20999.1	a	a	a
EquivSeg_Organic_C_kg_per_ha	2012-02-01	15-30 cm	SU	19305.6	a	a	a
EquivSeg_Organic_C_kg_per_ha	2012-02-01	30-61 cm	SU	19564.8	a	a	a
EquivSeg_Organic_C_kg_per_ha	2012-02-01	30-61 cm	DM + A	18746.5	a	a	a
EquivSeg_Organic_C_kg_per_ha	2012-02-01	30-61 cm	DM	18481.9	a	a	a
EquivSeg_Organic_C_kg_per_ha	2012-02-01	30-61 cm	Control	17397.8	a	a	a
EquivSeg_Organic_C_kg_per_ha	2012-02-01	30-61 cm	Urea	16374.4	a	a	a
EquivSeg_Organic_C_kg_per_ha	2012-02-01	61-91 cm	Urea	10810.3	a	a	a
EquivSeg_Organic_C_kg_per_ha	2012-02-01	61-91 cm	DM + A	10147	a	a	a
EquivSeg_Organic_C_kg_per_ha	2012-02-01	61-91 cm	Control	10040.6	a	a	a
EquivSeg_Organic_C_kg_per_ha	2012-02-01	61-91 cm	SU	9661.57	a	a	a
EquivSeg_Organic_C_kg_per_ha	2012-02-01	61-91 cm	DM	8817.51	a	a	a
EquivSeg_Organic_C_kg_per_ha	2012-02-01	91-120 cm	DM + A	6982.97	a	a	a
EquivSeg_Organic_C_kg_per_ha	2012-02-01	91-120 cm	Urea	6764.68	a	a	a
EquivSeg_Organic_C_kg_per_ha	2012-02-01	91-120 cm	SU	5737.97	a	a	a
EquivSeg_Organic_C_kg_per_ha	2012-02-01	91-120 cm	Control	5652.57	a	a	a
EquivSeg_Organic_C_kg_per_ha	2012-02-01	91-120 cm	DM	5272.33	a	a	a
EquivSeg_Organic_C_kg_per_ha	2012-11-16	0-7.6 cm	DM + A	15099.6	a	a	a
EquivSeg_Organic_C_kg_per_ha	2012-11-16	0-7.6 cm	DM	14376.8	ab	ab	ab
EquivSeg_Organic_C_kg_per_ha	2012-11-16	0-7.6 cm	SU	13059.6	ab	ab	ab
EquivSeg_Organic_C_kg_per_ha	2012-11-16	0-7.6 cm	Control	12230.7	ab	ab	ab
EquivSeg_Organic_C_kg_per_ha	2012-11-16	0-7.6 cm	Urea	11555	b	b	b
EquivSeg_Organic_C_kg_per_ha	2012-11-16	7.6-15 cm	DM + A	13625	a	a	a
EquivSeg_Organic_C_kg_per_ha	2012-11-16	7.6-15 cm	DM	12825.5	a	ab	ab
EquivSeg_Organic_C_kg_per_ha	2012-11-16	7.6-15 cm	SU	12347.9	a	ab	ab
EquivSeg_Organic_C_kg_per_ha	2012-11-16	7.6-15 cm	Control	11209.7	a	ab	b
EquivSeg_Organic_C_kg_per_ha	2012-11-16	7.6-15 cm	Urea	10965.2	a	b	b
EquivSeg_Organic_C_kg_per_ha	2012-11-16	15-30 cm	DM	21595.9	a	a	a
EquivSeg_Organic_C_kg_per_ha	2012-11-16	15-30 cm	DM + A	21548.9	a	a	a
EquivSeg_Organic_C_kg_per_ha	2012-11-16	15-30 cm	SU	21253	a	a	a
EquivSeg_Organic_C_kg_per_ha	2012-11-16	15-30 cm	Control	20771	a	a	a
EquivSeg_Organic_C_kg_per_ha	2012-11-16	15-30 cm	Urea	20626.6	a	a	a
EquivSeg_Organic_C_kg_per_ha	2012-11-16	30-61 cm	DM + A	21456.1	a	a	a
EquivSeg_Organic_C_kg_per_ha	2012-11-16	30-61 cm	Control	20942.1	a	a	a
EquivSeg_Organic_C_kg_per_ha	2012-11-16	30-61 cm	SU	20056.2	a	a	a
EquivSeg_Organic_C_kg_per_ha	2012-11-16	30-61 cm	Urea	19804.2	a	a	a
EquivSeg_Organic_C_kg_per_ha	2012-11-16	30-61 cm	DM	18317.3	a	a	a
EquivSeg_Organic_C_kg_per_ha	2012-11-16	61-91 cm	DM + A	9883.99	a	a	a
EquivSeg_Organic_C_kg_per_ha	2012-11-16	61-91 cm	SU	9412.5	a	a	a
EquivSeg_Organic_C_kg_per_ha	2012-11-16	61-91 cm	Urea	9189.8	a	a	a
EquivSeg_Organic_C_kg_per_ha	2012-11-16	61-91 cm	DM	8819.13	a	a	a
EquivSeg_Organic_C_kg_per_ha	2012-11-16	61-91 cm	Control	8692.14	a	a	a
EquivSeg_Organic_C_kg_per_ha	2012-11-16	91-120 cm	DM + A	6341.37	a	a	a
EquivSeg_Organic_C_kg_per_ha	2012-11-16	91-120 cm	DM	5735.6	a	a	a
EquivSeg_Organic_C_kg_per_ha	2012-11-16	91-120 cm	Urea	5552	a	a	a
EquivSeg_Organic_C_kg_per_ha	2012-11-16	91-120 cm	Control	5151.65	a	a	a
EquivSeg_Organic_C_kg_per_ha	2012-11-16	91-120 cm	SU	4916.36	a	a	a
EquivSeg_Organic_C_kg_per_ha	2013-11-08	0-7.6 cm	DM + A	16135.3	a	a	a
EquivSeg_Organic_C_kg_per_ha	2013-11-08	0-7.6 cm	DM	15257.1	ab	ab	ab
EquivSeg_Organic_C_kg_per_ha	2013-11-08	0-7.6 cm	Control	13056.1	b	b	bc
EquivSeg_Organic_C_kg_per_ha	2013-11-08	0-7.6 cm	Urea	12661.5	b	b	c
EquivSeg_Organic_C_kg_per_ha	2013-11-08	0-7.6 cm	SU	12593.7	b	b	c
EquivSeg_Organic_C_kg_per_ha	2013-11-08	7.6-15 cm	DM + A	15515.5	a	a	a
EquivSeg_Organic_C_kg_per_ha	2013-11-08	7.6-15 cm	DM	13995	ab	ab	ab
EquivSeg_Organic_C_kg_per_ha	2013-11-08	7.6-15 cm	Control	12892.5	b	b	b
EquivSeg_Organic_C_kg_per_ha	2013-11-08	7.6-15 cm	Urea	12748.3	b	b	b
EquivSeg_Organic_C_kg_per_ha	2013-11-08	7.6-15 cm	SU	12540.8	b	b	b
EquivSeg_Organic_C_kg_per_ha	2013-11-08	15-30 cm	Control	23762.1	a	a	a
EquivSeg_Organic_C_kg_per_ha	2013-11-08	15-30 cm	DM + A	23652.3	a	a	a
EquivSeg_Organic_C_kg_per_ha	2013-11-08	15-30 cm	SU	23201.8	a	a	a
EquivSeg_Organic_C_kg_per_ha	2013-11-08	15-30 cm	DM	23126.9	a	a	a
EquivSeg_Organic_C_kg_per_ha	2013-11-08	15-30 cm	Urea	22664.8	a	a	a
EquivSeg_Organic_C_kg_per_ha	2013-11-08	30-61 cm	DM + A	24308.9	a	a	a
EquivSeg_Organic_C_kg_per_ha	2013-11-08	30-61 cm	Control	24144.7	a	a	a
EquivSeg_Organic_C_kg_per_ha	2013-11-08	30-61 cm	DM	23087.8	a	a	a
EquivSeg_Organic_C_kg_per_ha	2013-11-08	30-61 cm	SU	22105.7	a	a	a
EquivSeg_Organic_C_kg_per_ha	2013-11-08	30-61 cm	Urea	21493.5	a	a	a
EquivSeg_Organic_C_kg_per_ha	2013-11-08	61-91 cm	Urea	14025.5	a	a	a
EquivSeg_Organic_C_kg_per_ha	2013-11-08	61-91 cm	Control	13018.2	a	a	a
EquivSeg_Organic_C_kg_per_ha	2013-11-08	61-91 cm	SU	12256.5	a	a	a
EquivSeg_Organic_C_kg_per_ha	2013-11-08	61-91 cm	DM	11541.1	a	a	a
EquivSeg_Organic_C_kg_per_ha	2013-11-08	61-91 cm	DM + A	10965.7	a	a	a
EquivSeg_Organic_C_kg_per_ha	2013-11-08	91-120 cm	Urea	8809.31	a	a	a
EquivSeg_Organic_C_kg_per_ha	2013-11-08	91-120 cm	DM	8368.85	a	a	a
EquivSeg_Organic_C_kg_per_ha	2013-11-08	91-120 cm	DM + A	7906.84	a	a	a
EquivSeg_Organic_C_kg_per_ha	2013-11-08	91-120 cm	Control	7641.91	a	a	a
EquivSeg_Organic_C_kg_per_ha	2013-11-08	91-120 cm	SU	7172.74	a	a	a
EquivSeg_Organic_C_kg_per_ha	2015-11-24	0-7.6 cm	DM	19472.7	a	a	a
EquivSeg_Organic_C_kg_per_ha	2015-11-24	0-7.6 cm	DM + A	14186.4	ab	ab	ab
EquivSeg_Organic_C_kg_per_ha	2015-11-24	0-7.6 cm	Urea	11870.1	b	b	b
EquivSeg_Organic_C_kg_per_ha	2015-11-24	0-7.6 cm	Control	11262.6	b	b	b
EquivSeg_Organic_C_kg_per_ha	2015-11-24	0-7.6 cm	SU	11016.1	b	b	b
EquivSeg_Organic_C_kg_per_ha	2015-11-24	7.6-15 cm	DM + A	17168.8	a	a	a
EquivSeg_Organic_C_kg_per_ha	2015-11-24	7.6-15 cm	DM	16225.4	ab	a	a
EquivSeg_Organic_C_kg_per_ha	2015-11-24	7.6-15 cm	Urea	13242.4	ab	ab	ab
EquivSeg_Organic_C_kg_per_ha	2015-11-24	7.6-15 cm	Control	11898.6	b	b	b
EquivSeg_Organic_C_kg_per_ha	2015-11-24	7.6-15 cm	SU	11842.8	b	b	b
EquivSeg_Organic_C_kg_per_ha	2015-11-24	15-30 cm	DM	29857.6	a	a	a
EquivSeg_Organic_C_kg_per_ha	2015-11-24	15-30 cm	DM + A	25086.3	ab	ab	ab
EquivSeg_Organic_C_kg_per_ha	2015-11-24	15-30 cm	SU	24344.6	ab	ab	ab
EquivSeg_Organic_C_kg_per_ha	2015-11-24	15-30 cm	Control	23560.4	ab	ab	ab
EquivSeg_Organic_C_kg_per_ha	2015-11-24	15-30 cm	Urea	21312.7	b	b	b
EquivSeg_Organic_C_kg_per_ha	2015-11-24	30-61 cm	DM	16472.7	a	a	a
EquivSeg_Organic_C_kg_per_ha	2015-11-24	30-61 cm	SU	15824.9	a	a	a
EquivSeg_Organic_C_kg_per_ha	2015-11-24	30-61 cm	Control	13180.4	a	a	a
EquivSeg_Organic_C_kg_per_ha	2015-11-24	30-61 cm	Urea	12756.3	a	a	a
EquivSeg_Organic_C_kg_per_ha	2015-11-24	30-61 cm	DM + A	12304.4	a	a	a
EquivSeg_Organic_C_kg_per_ha	2015-11-24	61-91 cm	DM	4229.82	a	a	a
EquivSeg_Organic_C_kg_per_ha	2015-11-24	61-91 cm	DM + A	3019.81	a	a	a
EquivSeg_Organic_C_kg_per_ha	2015-11-24	61-91 cm	Urea	2929.18	a	a	a
EquivSeg_Organic_C_kg_per_ha	2015-11-24	61-91 cm	SU	2674.66	a	a	a
EquivSeg_Organic_C_kg_per_ha	2015-11-24	61-91 cm	Control	2328.12	a	a	a
EquivSeg_Organic_C_kg_per_ha	2015-11-24	91-120 cm	DM + A	896.949	a	a	a
EquivSeg_Organic_C_kg_per_ha	2015-11-24	91-120 cm	Control	871.329	a	a	a
EquivSeg_Organic_C_kg_per_ha	2015-11-24	91-120 cm	DM	833.276	a	a	a
EquivSeg_Organic_C_kg_per_ha	2015-11-24	91-120 cm	Urea	664.341	a	a	a
EquivSeg_Organic_C_kg_per_ha	2015-11-24	91-120 cm	SU	13.3928	a	a	a
EquivSeg_Organic_C_kg_per_ha	2016-11-16	0-7.6 cm	DM + A	17465.3	a	a	a
EquivSeg_Organic_C_kg_per_ha	2016-11-16	0-7.6 cm	DM	16217.2	a	a	ab
EquivSeg_Organic_C_kg_per_ha	2016-11-16	0-7.6 cm	SU	13322.3	a	a	ab
EquivSeg_Organic_C_kg_per_ha	2016-11-16	0-7.6 cm	Control	13040.3	a	a	ab
EquivSeg_Organic_C_kg_per_ha	2016-11-16	0-7.6 cm	Urea	11924	a	a	b
EquivSeg_Organic_C_kg_per_ha	2016-11-16	7.6-15 cm	DM + A	17584.7	a	a	a
EquivSeg_Organic_C_kg_per_ha	2016-11-16	7.6-15 cm	DM	16863.9	ab	ab	a
EquivSeg_Organic_C_kg_per_ha	2016-11-16	7.6-15 cm	SU	13049.6	bc	bc	b
EquivSeg_Organic_C_kg_per_ha	2016-11-16	7.6-15 cm	Urea	12257	c	c	b
EquivSeg_Organic_C_kg_per_ha	2016-11-16	7.6-15 cm	Control	12191.2	c	c	b
EquivSeg_Organic_C_kg_per_ha	2016-11-16	15-30 cm	DM + A	23222.4	a	a	a
EquivSeg_Organic_C_kg_per_ha	2016-11-16	15-30 cm	DM	22872.4	a	a	a
EquivSeg_Organic_C_kg_per_ha	2016-11-16	15-30 cm	Control	22663.1	a	a	a
EquivSeg_Organic_C_kg_per_ha	2016-11-16	15-30 cm	Urea	20527.5	a	a	a
EquivSeg_Organic_C_kg_per_ha	2016-11-16	15-30 cm	SU	20162.2	a	a	a
EquivSeg_Organic_C_kg_per_ha	2016-11-16	30-61 cm	DM + A	23467.7	a	a	a
EquivSeg_Organic_C_kg_per_ha	2016-11-16	30-61 cm	DM	21235.9	a	a	a
EquivSeg_Organic_C_kg_per_ha	2016-11-16	30-61 cm	Urea	20851.6	a	a	a
EquivSeg_Organic_C_kg_per_ha	2016-11-16	30-61 cm	Control	20840.2	a	a	a
EquivSeg_Organic_C_kg_per_ha	2016-11-16	30-61 cm	SU	20140.8	a	a	a
EquivSeg_Organic_C_kg_per_ha	2016-11-16	61-91 cm	DM	15905.6	a	a	a
EquivSeg_Organic_C_kg_per_ha	2016-11-16	61-91 cm	Urea	13981.6	a	a	a
EquivSeg_Organic_C_kg_per_ha	2016-11-16	61-91 cm	DM + A	12477.1	a	a	a
EquivSeg_Organic_C_kg_per_ha	2016-11-16	61-91 cm	Control	11967.4	a	a	a
EquivSeg_Organic_C_kg_per_ha	2016-11-16	61-91 cm	SU	10730.2	a	a	a
EquivSeg_Organic_C_kg_per_ha	2016-11-16	91-120 cm	Control	10022.5	a	a	a
EquivSeg_Organic_C_kg_per_ha	2016-11-16	91-120 cm	DM	9325.06	a	a	a
EquivSeg_Organic_C_kg_per_ha	2016-11-16	91-120 cm	DM + A	8841.39	a	a	a
EquivSeg_Organic_C_kg_per_ha	2016-11-16	91-120 cm	SU	8206.94	a	a	a
EquivSeg_Organic_C_kg_per_ha	2016-11-16	91-120 cm	Urea	7515.41	a	a	a
EquivSeg_Organic_C_kg_per_ha	2017-11-13	0-7.6 cm	DM	16670.1	a	a	a
EquivSeg_Organic_C_kg_per_ha	2017-11-13	0-7.6 cm	DM + SU	15566.6	a	a	a
EquivSeg_Organic_C_kg_per_ha	2017-11-13	0-7.6 cm	Urea	11751.9	b	b	b
EquivSeg_Organic_C_kg_per_ha	2017-11-13	0-7.6 cm	SU	11474	b	b	b
EquivSeg_Organic_C_kg_per_ha	2017-11-13	0-7.6 cm	Control	11184.1	b	b	b
EquivSeg_Organic_C_kg_per_ha	2017-11-13	7.6-15 cm	DM	17344.5	a	a	a
EquivSeg_Organic_C_kg_per_ha	2017-11-13	7.6-15 cm	DM + SU	16826.1	a	a	a
EquivSeg_Organic_C_kg_per_ha	2017-11-13	7.6-15 cm	SU	12284.1	b	b	b
EquivSeg_Organic_C_kg_per_ha	2017-11-13	7.6-15 cm	Urea	11896.6	b	b	b
EquivSeg_Organic_C_kg_per_ha	2017-11-13	7.6-15 cm	Control	11666.4	b	b	b
EquivSeg_Organic_C_kg_per_ha	2017-11-13	15-30 cm	DM + SU	23777.1	a	a	a
EquivSeg_Organic_C_kg_per_ha	2017-11-13	15-30 cm	DM	23511.3	a	a	a
EquivSeg_Organic_C_kg_per_ha	2017-11-13	15-30 cm	SU	21618.6	a	a	a
EquivSeg_Organic_C_kg_per_ha	2017-11-13	15-30 cm	Control	21496.9	a	a	a
EquivSeg_Organic_C_kg_per_ha	2017-11-13	15-30 cm	Urea	21263.8	a	a	a
EquivSeg_Organic_C_kg_per_ha	2017-11-13	30-61 cm	DM + SU	24825.5	a	a	a
EquivSeg_Organic_C_kg_per_ha	2017-11-13	30-61 cm	DM	24055.2	a	a	a
EquivSeg_Organic_C_kg_per_ha	2017-11-13	30-61 cm	Control	22199.6	a	a	a
EquivSeg_Organic_C_kg_per_ha	2017-11-13	30-61 cm	SU	22151.7	a	a	a
EquivSeg_Organic_C_kg_per_ha	2017-11-13	30-61 cm	Urea	19972.5	a	a	a
EquivSeg_Organic_C_kg_per_ha	2017-11-13	61-91 cm	Urea	12067.1	a	a	a
EquivSeg_Organic_C_kg_per_ha	2017-11-13	61-91 cm	DM + SU	12024.4	a	a	a
EquivSeg_Organic_C_kg_per_ha	2017-11-13	61-91 cm	DM	11399.3	a	a	a
EquivSeg_Organic_C_kg_per_ha	2017-11-13	61-91 cm	SU	10237.5	a	a	a
EquivSeg_Organic_C_kg_per_ha	2017-11-13	61-91 cm	Control	9613.1	a	a	a
EquivSeg_Organic_C_kg_per_ha	2017-11-13	91-120 cm	DM + SU	8474.37	a	a	a
EquivSeg_Organic_C_kg_per_ha	2017-11-13	91-120 cm	Control	8207.19	a	a	a
EquivSeg_Organic_C_kg_per_ha	2017-11-13	91-120 cm	DM	7788.55	a	a	a
EquivSeg_Organic_C_kg_per_ha	2017-11-13	91-120 cm	Urea	7125.82	a	a	a
EquivSeg_Organic_C_kg_per_ha	2017-11-13	91-120 cm	SU	6215.87	a	a	a
EquivSeg_Organic_N_kg_per_ha	2012-02-01	0-7.6 cm	SU	1542.2	a	a	a
EquivSeg_Organic_N_kg_per_ha	2012-02-01	0-7.6 cm	DM	1503.42	a	a	a
EquivSeg_Organic_N_kg_per_ha	2012-02-01	0-7.6 cm	Urea	1502.34	a	a	a
EquivSeg_Organic_N_kg_per_ha	2012-02-01	0-7.6 cm	DM + A	1481.51	a	a	a
EquivSeg_Organic_N_kg_per_ha	2012-02-01	0-7.6 cm	Control	1425.47	a	a	a
EquivSeg_Organic_N_kg_per_ha	2012-02-01	7.6-15 cm	DM	1418.16	a	a	a
EquivSeg_Organic_N_kg_per_ha	2012-02-01	7.6-15 cm	Urea	1413.14	a	a	a
EquivSeg_Organic_N_kg_per_ha	2012-02-01	7.6-15 cm	DM + A	1398.12	a	a	a
EquivSeg_Organic_N_kg_per_ha	2012-02-01	7.6-15 cm	Control	1356.49	a	a	a
EquivSeg_Organic_N_kg_per_ha	2012-02-01	7.6-15 cm	SU	1326.31	a	a	a
EquivSeg_Organic_N_kg_per_ha	2012-02-01	15-30 cm	Control	2920.72	a	a	a
EquivSeg_Organic_N_kg_per_ha	2012-02-01	15-30 cm	Urea	2871.35	a	a	a
EquivSeg_Organic_N_kg_per_ha	2012-02-01	15-30 cm	DM + A	2806.01	a	a	a
EquivSeg_Organic_N_kg_per_ha	2012-02-01	15-30 cm	DM	2802.1	a	a	a
EquivSeg_Organic_N_kg_per_ha	2012-02-01	15-30 cm	SU	2653.45	a	a	a
EquivSeg_Organic_N_kg_per_ha	2012-02-01	30-61 cm	DM + A	3138.15	a	a	a
EquivSeg_Organic_N_kg_per_ha	2012-02-01	30-61 cm	DM	3091.38	a	a	a
EquivSeg_Organic_N_kg_per_ha	2012-02-01	30-61 cm	Urea	2962.81	a	a	a
EquivSeg_Organic_N_kg_per_ha	2012-02-01	30-61 cm	SU	2873.94	a	a	a
EquivSeg_Organic_N_kg_per_ha	2012-02-01	30-61 cm	Control	2780.68	a	a	a
EquivSeg_Organic_N_kg_per_ha	2012-02-01	61-91 cm	SU	2118.04	a	a	a
EquivSeg_Organic_N_kg_per_ha	2012-02-01	61-91 cm	Urea	2066.24	a	a	a
EquivSeg_Organic_N_kg_per_ha	2012-02-01	61-91 cm	DM	2050.23	a	a	a
EquivSeg_Organic_N_kg_per_ha	2012-02-01	61-91 cm	DM + A	1956.15	a	a	a
EquivSeg_Organic_N_kg_per_ha	2012-02-01	61-91 cm	Control	1819.66	a	a	a
EquivSeg_Organic_N_kg_per_ha	2012-02-01	91-120 cm	DM + A	1648.39	a	a	a
EquivSeg_Organic_N_kg_per_ha	2012-02-01	91-120 cm	SU	1630.5	a	a	a
EquivSeg_Organic_N_kg_per_ha	2012-02-01	91-120 cm	Urea	1613.73	a	a	a
EquivSeg_Organic_N_kg_per_ha	2012-02-01	91-120 cm	DM	1543.3	a	a	a
EquivSeg_Organic_N_kg_per_ha	2012-02-01	91-120 cm	Control	1398.52	a	a	a
EquivSeg_Organic_N_kg_per_ha	2012-11-16	0-7.6 cm	DM + A	1782.42	a	a	a
EquivSeg_Organic_N_kg_per_ha	2012-11-16	0-7.6 cm	DM	1692.55	ab	ab	ab
EquivSeg_Organic_N_kg_per_ha	2012-11-16	0-7.6 cm	SU	1503.45	bc	bc	bc
EquivSeg_Organic_N_kg_per_ha	2012-11-16	0-7.6 cm	Control	1430.93	bc	c	c
EquivSeg_Organic_N_kg_per_ha	2012-11-16	0-7.6 cm	Urea	1402.51	c	c	c
EquivSeg_Organic_N_kg_per_ha	2012-11-16	7.6-15 cm	DM + A	1678.79	a	a	a
EquivSeg_Organic_N_kg_per_ha	2012-11-16	7.6-15 cm	DM	1600.05	a	ab	ab
EquivSeg_Organic_N_kg_per_ha	2012-11-16	7.6-15 cm	SU	1468.89	a	ab	ab
EquivSeg_Organic_N_kg_per_ha	2012-11-16	7.6-15 cm	Urea	1412.72	a	b	b
EquivSeg_Organic_N_kg_per_ha	2012-11-16	7.6-15 cm	Control	1402.73	a	b	b
EquivSeg_Organic_N_kg_per_ha	2012-11-16	15-30 cm	DM + A	2992.34	a	a	a
EquivSeg_Organic_N_kg_per_ha	2012-11-16	15-30 cm	DM	2947.4	a	a	a
EquivSeg_Organic_N_kg_per_ha	2012-11-16	15-30 cm	SU	2861.33	a	a	a
EquivSeg_Organic_N_kg_per_ha	2012-11-16	15-30 cm	Control	2823.59	a	a	a
EquivSeg_Organic_N_kg_per_ha	2012-11-16	15-30 cm	Urea	2795.81	a	a	a
EquivSeg_Organic_N_kg_per_ha	2012-11-16	30-61 cm	DM + A	3545.35	a	a	a
EquivSeg_Organic_N_kg_per_ha	2012-11-16	30-61 cm	Control	3294.11	a	a	a
EquivSeg_Organic_N_kg_per_ha	2012-11-16	30-61 cm	SU	3163.23	a	a	a
EquivSeg_Organic_N_kg_per_ha	2012-11-16	30-61 cm	Urea	3065.59	a	a	a
EquivSeg_Organic_N_kg_per_ha	2012-11-16	30-61 cm	DM	3062.98	a	a	a
EquivSeg_Organic_N_kg_per_ha	2012-11-16	61-91 cm	DM + A	2165.49	a	a	a
EquivSeg_Organic_N_kg_per_ha	2012-11-16	61-91 cm	SU	2052.39	a	a	a
EquivSeg_Organic_N_kg_per_ha	2012-11-16	61-91 cm	DM	2035.81	a	a	a
EquivSeg_Organic_N_kg_per_ha	2012-11-16	61-91 cm	Control	1996	a	a	a
EquivSeg_Organic_N_kg_per_ha	2012-11-16	61-91 cm	Urea	1988.75	a	a	a
EquivSeg_Organic_N_kg_per_ha	2012-11-16	91-120 cm	DM + A	1812.38	a	a	a
EquivSeg_Organic_N_kg_per_ha	2012-11-16	91-120 cm	DM	1677.61	a	a	a
EquivSeg_Organic_N_kg_per_ha	2012-11-16	91-120 cm	Control	1538.91	a	a	a
EquivSeg_Organic_N_kg_per_ha	2012-11-16	91-120 cm	SU	1530.03	a	a	a
EquivSeg_Organic_N_kg_per_ha	2012-11-16	91-120 cm	Urea	1519.8	a	a	a
EquivSeg_Organic_N_kg_per_ha	2013-11-08	0-7.6 cm	DM + A	1973.79	a	a	a
EquivSeg_Organic_N_kg_per_ha	2013-11-08	0-7.6 cm	DM	1903.75	a	a	a
EquivSeg_Organic_N_kg_per_ha	2013-11-08	0-7.6 cm	Control	1637.09	b	b	b
EquivSeg_Organic_N_kg_per_ha	2013-11-08	0-7.6 cm	Urea	1619.39	b	b	b
EquivSeg_Organic_N_kg_per_ha	2013-11-08	0-7.6 cm	SU	1606.23	b	b	b
EquivSeg_Organic_N_kg_per_ha	2013-11-08	7.6-15 cm	DM + A	1921.55	a	a	a
EquivSeg_Organic_N_kg_per_ha	2013-11-08	7.6-15 cm	DM	1818.35	ab	ab	ab
EquivSeg_Organic_N_kg_per_ha	2013-11-08	7.6-15 cm	Control	1700.47	ab	b	bc
EquivSeg_Organic_N_kg_per_ha	2013-11-08	7.6-15 cm	SU	1647.56	b	b	bc
EquivSeg_Organic_N_kg_per_ha	2013-11-08	7.6-15 cm	Urea	1620.79	b	b	c
EquivSeg_Organic_N_kg_per_ha	2013-11-08	15-30 cm	Control	3409.78	a	a	a
EquivSeg_Organic_N_kg_per_ha	2013-11-08	15-30 cm	DM + A	3374.56	a	a	a
EquivSeg_Organic_N_kg_per_ha	2013-11-08	15-30 cm	SU	3346.27	a	a	a
EquivSeg_Organic_N_kg_per_ha	2013-11-08	15-30 cm	DM	3321.73	a	a	a
EquivSeg_Organic_N_kg_per_ha	2013-11-08	15-30 cm	Urea	3260.65	a	a	a
EquivSeg_Organic_N_kg_per_ha	2013-11-08	30-61 cm	DM + A	4251.71	a	a	a
EquivSeg_Organic_N_kg_per_ha	2013-11-08	30-61 cm	SU	4214.36	a	a	a
EquivSeg_Organic_N_kg_per_ha	2013-11-08	30-61 cm	Urea	4114.82	a	a	a
EquivSeg_Organic_N_kg_per_ha	2013-11-08	30-61 cm	Control	4103.56	a	a	a
EquivSeg_Organic_N_kg_per_ha	2013-11-08	30-61 cm	DM	3871.14	a	a	a
EquivSeg_Organic_N_kg_per_ha	2013-11-08	61-91 cm	SU	2920	a	a	a
EquivSeg_Organic_N_kg_per_ha	2013-11-08	61-91 cm	Control	2863.54	a	a	a
EquivSeg_Organic_N_kg_per_ha	2013-11-08	61-91 cm	Urea	2842.59	a	a	a
EquivSeg_Organic_N_kg_per_ha	2013-11-08	61-91 cm	DM + A	2756.58	a	a	a
EquivSeg_Organic_N_kg_per_ha	2013-11-08	61-91 cm	DM	2745	a	a	a
EquivSeg_Organic_N_kg_per_ha	2013-11-08	91-120 cm	Control	2557.95	a	a	a
EquivSeg_Organic_N_kg_per_ha	2013-11-08	91-120 cm	SU	2496.36	a	a	a
EquivSeg_Organic_N_kg_per_ha	2013-11-08	91-120 cm	DM + A	2434.53	a	a	a
EquivSeg_Organic_N_kg_per_ha	2013-11-08	91-120 cm	DM	2415.83	a	a	a
EquivSeg_Organic_N_kg_per_ha	2013-11-08	91-120 cm	Urea	2351.69	a	a	a
EquivSeg_Organic_N_kg_per_ha	2015-11-24	0-7.6 cm	DM	2205.1	a	a	a
EquivSeg_Organic_N_kg_per_ha	2015-11-24	0-7.6 cm	DM + A	1776.67	ab	ab	ab
EquivSeg_Organic_N_kg_per_ha	2015-11-24	0-7.6 cm	Urea	1554.74	b	b	b
EquivSeg_Organic_N_kg_per_ha	2015-11-24	0-7.6 cm	Control	1486.15	b	b	b
EquivSeg_Organic_N_kg_per_ha	2015-11-24	0-7.6 cm	SU	1479.62	b	b	b
EquivSeg_Organic_N_kg_per_ha	2015-11-24	7.6-15 cm	DM + A	2065.72	a	a	a
EquivSeg_Organic_N_kg_per_ha	2015-11-24	7.6-15 cm	DM	1980.34	ab	ab	ab
EquivSeg_Organic_N_kg_per_ha	2015-11-24	7.6-15 cm	Urea	1671.35	abc	bc	bc
EquivSeg_Organic_N_kg_per_ha	2015-11-24	7.6-15 cm	Control	1593.47	bc	c	c
EquivSeg_Organic_N_kg_per_ha	2015-11-24	7.6-15 cm	SU	1551.02	c	c	c
EquivSeg_Organic_N_kg_per_ha	2015-11-24	15-30 cm	DM	4005.07	a	a	a
EquivSeg_Organic_N_kg_per_ha	2015-11-24	15-30 cm	SU	3385.57	ab	ab	ab
EquivSeg_Organic_N_kg_per_ha	2015-11-24	15-30 cm	DM + A	3314.81	ab	ab	b
EquivSeg_Organic_N_kg_per_ha	2015-11-24	15-30 cm	Control	3202.02	b	b	b
EquivSeg_Organic_N_kg_per_ha	2015-11-24	15-30 cm	Urea	3150.5	b	b	b
EquivSeg_Organic_N_kg_per_ha	2015-11-24	30-61 cm	SU	3620.56	a	a	a
EquivSeg_Organic_N_kg_per_ha	2015-11-24	30-61 cm	DM	3440	a	a	a
EquivSeg_Organic_N_kg_per_ha	2015-11-24	30-61 cm	Urea	3394.29	a	a	a
EquivSeg_Organic_N_kg_per_ha	2015-11-24	30-61 cm	DM + A	3354.59	a	a	a
EquivSeg_Organic_N_kg_per_ha	2015-11-24	30-61 cm	Control	3266.52	a	a	a
EquivSeg_Organic_N_kg_per_ha	2015-11-24	61-91 cm	DM	2197.43	a	a	a
EquivSeg_Organic_N_kg_per_ha	2015-11-24	61-91 cm	Urea	2193.3	a	a	a
EquivSeg_Organic_N_kg_per_ha	2015-11-24	61-91 cm	SU	2082.46	a	a	a
EquivSeg_Organic_N_kg_per_ha	2015-11-24	61-91 cm	DM + A	1984.41	a	a	a
EquivSeg_Organic_N_kg_per_ha	2015-11-24	61-91 cm	Control	1973.27	a	a	a
EquivSeg_Organic_N_kg_per_ha	2015-11-24	91-120 cm	DM	1751.9	a	a	a
EquivSeg_Organic_N_kg_per_ha	2015-11-24	91-120 cm	Control	1743.89	a	a	a
EquivSeg_Organic_N_kg_per_ha	2015-11-24	91-120 cm	Urea	1579.79	a	a	a
EquivSeg_Organic_N_kg_per_ha	2015-11-24	91-120 cm	DM + A	1513.86	a	a	a
EquivSeg_Organic_N_kg_per_ha	2015-11-24	91-120 cm	SU	1486.65	a	a	a
EquivSeg_Organic_N_kg_per_ha	2016-11-16	0-7.6 cm	DM + A	1858.36	a	a	a
EquivSeg_Organic_N_kg_per_ha	2016-11-16	0-7.6 cm	DM	1727.9	ab	ab	ab
EquivSeg_Organic_N_kg_per_ha	2016-11-16	0-7.6 cm	Control	1434.52	ab	ab	abc
EquivSeg_Organic_N_kg_per_ha	2016-11-16	0-7.6 cm	SU	1409.91	ab	b	bc
EquivSeg_Organic_N_kg_per_ha	2016-11-16	0-7.6 cm	Urea	1304.86	b	b	c
EquivSeg_Organic_N_kg_per_ha	2016-11-16	7.6-15 cm	DM + A	1874.09	a	a	a
EquivSeg_Organic_N_kg_per_ha	2016-11-16	7.6-15 cm	DM	1787.42	ab	ab	ab
EquivSeg_Organic_N_kg_per_ha	2016-11-16	7.6-15 cm	Control	1468.39	bc	bc	bc
EquivSeg_Organic_N_kg_per_ha	2016-11-16	7.6-15 cm	SU	1395.25	c	c	c
EquivSeg_Organic_N_kg_per_ha	2016-11-16	7.6-15 cm	Urea	1377.35	c	c	c
EquivSeg_Organic_N_kg_per_ha	2016-11-16	15-30 cm	DM	3114.7	a	a	a
EquivSeg_Organic_N_kg_per_ha	2016-11-16	15-30 cm	DM + A	2783.52	a	a	a
EquivSeg_Organic_N_kg_per_ha	2016-11-16	15-30 cm	Control	2737.27	a	a	a
EquivSeg_Organic_N_kg_per_ha	2016-11-16	15-30 cm	Urea	2477.56	a	a	a
EquivSeg_Organic_N_kg_per_ha	2016-11-16	15-30 cm	SU	2414.75	a	a	a
EquivSeg_Organic_N_kg_per_ha	2016-11-16	30-61 cm	DM + A	2985.58	a	a	a
EquivSeg_Organic_N_kg_per_ha	2016-11-16	30-61 cm	DM	2936.31	a	a	a
EquivSeg_Organic_N_kg_per_ha	2016-11-16	30-61 cm	SU	2780.64	a	a	a
EquivSeg_Organic_N_kg_per_ha	2016-11-16	30-61 cm	Urea	2725.54	a	a	a
EquivSeg_Organic_N_kg_per_ha	2016-11-16	30-61 cm	Control	2695.04	a	a	a
EquivSeg_Organic_N_kg_per_ha	2016-11-16	61-91 cm	DM	1971.34	a	a	a
EquivSeg_Organic_N_kg_per_ha	2016-11-16	61-91 cm	Urea	1876.14	a	a	a
EquivSeg_Organic_N_kg_per_ha	2016-11-16	61-91 cm	DM + A	1751.24	a	a	a
EquivSeg_Organic_N_kg_per_ha	2016-11-16	61-91 cm	SU	1746.82	a	a	a
EquivSeg_Organic_N_kg_per_ha	2016-11-16	61-91 cm	Control	1663.25	a	a	a
EquivSeg_Organic_N_kg_per_ha	2016-11-16	91-120 cm	DM + A	1466.81	a	a	a
EquivSeg_Organic_N_kg_per_ha	2016-11-16	91-120 cm	Control	1429.03	a	a	a
EquivSeg_Organic_N_kg_per_ha	2016-11-16	91-120 cm	DM	1379.25	a	a	a
EquivSeg_Organic_N_kg_per_ha	2016-11-16	91-120 cm	SU	1274.62	a	a	a
EquivSeg_Organic_N_kg_per_ha	2016-11-16	91-120 cm	Urea	1241.12	a	a	a
EquivSeg_Organic_N_kg_per_ha	2017-11-13	0-7.6 cm	DM	1853.73	a	a	a
EquivSeg_Organic_N_kg_per_ha	2017-11-13	0-7.6 cm	DM + SU	1844.99	a	a	a
EquivSeg_Organic_N_kg_per_ha	2017-11-13	0-7.6 cm	Urea	1406.87	b	b	b
EquivSeg_Organic_N_kg_per_ha	2017-11-13	0-7.6 cm	SU	1372.55	b	b	b
EquivSeg_Organic_N_kg_per_ha	2017-11-13	0-7.6 cm	Control	1368.54	b	b	b
EquivSeg_Organic_N_kg_per_ha	2017-11-13	7.6-15 cm	DM	1931.48	a	a	a
EquivSeg_Organic_N_kg_per_ha	2017-11-13	7.6-15 cm	DM + SU	1891.17	a	a	a
EquivSeg_Organic_N_kg_per_ha	2017-11-13	7.6-15 cm	SU	1475.85	b	b	b
EquivSeg_Organic_N_kg_per_ha	2017-11-13	7.6-15 cm	Urea	1445.18	b	b	b
EquivSeg_Organic_N_kg_per_ha	2017-11-13	7.6-15 cm	Control	1406.29	b	b	b
EquivSeg_Organic_N_kg_per_ha	2017-11-13	15-30 cm	DM + SU	3083.4	a	a	a
EquivSeg_Organic_N_kg_per_ha	2017-11-13	15-30 cm	DM	2962.84	a	a	a
EquivSeg_Organic_N_kg_per_ha	2017-11-13	15-30 cm	SU	2831.91	a	a	a
EquivSeg_Organic_N_kg_per_ha	2017-11-13	15-30 cm	Control	2807.76	a	a	a
EquivSeg_Organic_N_kg_per_ha	2017-11-13	15-30 cm	Urea	2781.28	a	a	a
EquivSeg_Organic_N_kg_per_ha	2017-11-13	30-61 cm	DM	3591.86	a	a	a
EquivSeg_Organic_N_kg_per_ha	2017-11-13	30-61 cm	SU	3382.18	a	a	a
EquivSeg_Organic_N_kg_per_ha	2017-11-13	30-61 cm	DM + SU	3299.86	a	a	a
EquivSeg_Organic_N_kg_per_ha	2017-11-13	30-61 cm	Control	3267.62	a	a	a
EquivSeg_Organic_N_kg_per_ha	2017-11-13	30-61 cm	Urea	3131.58	a	a	a
EquivSeg_Organic_N_kg_per_ha	2017-11-13	61-91 cm	Urea	2018.76	a	a	a
EquivSeg_Organic_N_kg_per_ha	2017-11-13	61-91 cm	SU	1932.17	a	a	a
EquivSeg_Organic_N_kg_per_ha	2017-11-13	61-91 cm	Control	1911.68	a	a	a
EquivSeg_Organic_N_kg_per_ha	2017-11-13	61-91 cm	DM	1899.72	a	a	a
EquivSeg_Organic_N_kg_per_ha	2017-11-13	61-91 cm	DM + SU	1872.22	a	a	a
EquivSeg_Organic_N_kg_per_ha	2017-11-13	91-120 cm	DM	1585.34	a	a	a
EquivSeg_Organic_N_kg_per_ha	2017-11-13	91-120 cm	Urea	1544.85	a	a	a
EquivSeg_Organic_N_kg_per_ha	2017-11-13	91-120 cm	Control	1525.98	a	a	a
EquivSeg_Organic_N_kg_per_ha	2017-11-13	91-120 cm	SU	1484.64	a	a	a
EquivSeg_Organic_N_kg_per_ha	2017-11-13	91-120 cm	DM + SU	1455.64	a	a	a
EquivSeg_Total_C_kg_per_ha	2012-02-01	0-7.6 cm	SU	23295.5	a	a	a
EquivSeg_Total_C_kg_per_ha	2012-02-01	0-7.6 cm	Urea	22959.7	a	a	a
EquivSeg_Total_C_kg_per_ha	2012-02-01	0-7.6 cm	DM	22762.3	a	a	a
EquivSeg_Total_C_kg_per_ha	2012-02-01	0-7.6 cm	DM + A	22572.5	a	a	a
EquivSeg_Total_C_kg_per_ha	2012-02-01	0-7.6 cm	Control	22241.2	a	a	a
EquivSeg_Total_C_kg_per_ha	2012-02-01	7.6-15 cm	DM	22038.1	a	a	a
EquivSeg_Total_C_kg_per_ha	2012-02-01	7.6-15 cm	Control	21861.9	a	a	a
EquivSeg_Total_C_kg_per_ha	2012-02-01	7.6-15 cm	DM + A	21788.3	a	a	a
EquivSeg_Total_C_kg_per_ha	2012-02-01	7.6-15 cm	Urea	21661	a	a	a
EquivSeg_Total_C_kg_per_ha	2012-02-01	7.6-15 cm	SU	21359	a	a	a
EquivSeg_Total_C_kg_per_ha	2012-02-01	15-30 cm	Urea	50696.9	a	a	a
EquivSeg_Total_C_kg_per_ha	2012-02-01	15-30 cm	Control	49529.8	a	a	a
EquivSeg_Total_C_kg_per_ha	2012-02-01	15-30 cm	DM	48507.3	a	a	a
EquivSeg_Total_C_kg_per_ha	2012-02-01	15-30 cm	DM + A	48093.4	a	a	a
EquivSeg_Total_C_kg_per_ha	2012-02-01	15-30 cm	SU	46298.3	a	a	a
EquivSeg_Total_C_kg_per_ha	2012-02-01	30-61 cm	DM	93142.2	a	a	a
EquivSeg_Total_C_kg_per_ha	2012-02-01	30-61 cm	Control	91668.8	a	a	a
EquivSeg_Total_C_kg_per_ha	2012-02-01	30-61 cm	SU	90944	a	a	a
EquivSeg_Total_C_kg_per_ha	2012-02-01	30-61 cm	DM + A	88715.9	a	a	a
EquivSeg_Total_C_kg_per_ha	2012-02-01	30-61 cm	Urea	86597.7	a	a	a
EquivSeg_Total_C_kg_per_ha	2012-02-01	61-91 cm	Control	68835.2	a	a	a
EquivSeg_Total_C_kg_per_ha	2012-02-01	61-91 cm	DM	64961.5	a	a	a
EquivSeg_Total_C_kg_per_ha	2012-02-01	61-91 cm	DM + A	64649.2	a	a	a
EquivSeg_Total_C_kg_per_ha	2012-02-01	61-91 cm	Urea	62255.2	a	a	a
EquivSeg_Total_C_kg_per_ha	2012-02-01	61-91 cm	SU	61546.5	a	a	a
EquivSeg_Total_C_kg_per_ha	2012-02-01	91-120 cm	SU	49383.3	a	a	a
EquivSeg_Total_C_kg_per_ha	2012-02-01	91-120 cm	Control	48766	a	a	a
EquivSeg_Total_C_kg_per_ha	2012-02-01	91-120 cm	Urea	47134.8	a	a	a
EquivSeg_Total_C_kg_per_ha	2012-02-01	91-120 cm	DM + A	47080.5	a	a	a
EquivSeg_Total_C_kg_per_ha	2012-02-01	91-120 cm	DM	46712.5	a	a	a
EquivSeg_Total_C_kg_per_ha	2012-11-16	0-7.6 cm	DM + A	25548.8	a	a	a
EquivSeg_Total_C_kg_per_ha	2012-11-16	0-7.6 cm	DM	25005.4	a	a	a
EquivSeg_Total_C_kg_per_ha	2012-11-16	0-7.6 cm	SU	23567.4	a	a	a
EquivSeg_Total_C_kg_per_ha	2012-11-16	0-7.6 cm	Control	22569.6	a	a	a
EquivSeg_Total_C_kg_per_ha	2012-11-16	0-7.6 cm	Urea	22198.8	a	a	a
EquivSeg_Total_C_kg_per_ha	2012-11-16	7.6-15 cm	DM + A	24667.7	a	a	a
EquivSeg_Total_C_kg_per_ha	2012-11-16	7.6-15 cm	DM	23637.1	a	a	a
EquivSeg_Total_C_kg_per_ha	2012-11-16	7.6-15 cm	SU	23148.5	a	a	a
EquivSeg_Total_C_kg_per_ha	2012-11-16	7.6-15 cm	Control	22335.7	a	a	a
EquivSeg_Total_C_kg_per_ha	2012-11-16	7.6-15 cm	Urea	22148.6	a	a	a
EquivSeg_Total_C_kg_per_ha	2012-11-16	15-30 cm	DM	49392.5	a	a	a
EquivSeg_Total_C_kg_per_ha	2012-11-16	15-30 cm	Urea	48918.2	a	a	a
EquivSeg_Total_C_kg_per_ha	2012-11-16	15-30 cm	SU	48821	a	a	a
EquivSeg_Total_C_kg_per_ha	2012-11-16	15-30 cm	DM + A	48319.6	a	a	a
EquivSeg_Total_C_kg_per_ha	2012-11-16	15-30 cm	Control	48007.1	a	a	a
EquivSeg_Total_C_kg_per_ha	2012-11-16	30-61 cm	Control	98669.9	a	a	a
EquivSeg_Total_C_kg_per_ha	2012-11-16	30-61 cm	Urea	94392.1	a	a	a
EquivSeg_Total_C_kg_per_ha	2012-11-16	30-61 cm	SU	91939.8	a	a	a
EquivSeg_Total_C_kg_per_ha	2012-11-16	30-61 cm	DM + A	89275.3	a	a	a
EquivSeg_Total_C_kg_per_ha	2012-11-16	30-61 cm	DM	86098.6	a	a	a
EquivSeg_Total_C_kg_per_ha	2012-11-16	61-91 cm	DM + A	66768.3	a	a	a
EquivSeg_Total_C_kg_per_ha	2012-11-16	61-91 cm	Control	66668.1	a	a	a
EquivSeg_Total_C_kg_per_ha	2012-11-16	61-91 cm	SU	66666	a	a	a
EquivSeg_Total_C_kg_per_ha	2012-11-16	61-91 cm	DM	62979.2	a	a	a
EquivSeg_Total_C_kg_per_ha	2012-11-16	61-91 cm	Urea	61917.8	a	a	a
EquivSeg_Total_C_kg_per_ha	2012-11-16	91-120 cm	DM + A	48808	a	a	a
EquivSeg_Total_C_kg_per_ha	2012-11-16	91-120 cm	SU	48037	a	a	a
EquivSeg_Total_C_kg_per_ha	2012-11-16	91-120 cm	Control	46744.6	a	a	a
EquivSeg_Total_C_kg_per_ha	2012-11-16	91-120 cm	Urea	46719.9	a	a	a
EquivSeg_Total_C_kg_per_ha	2012-11-16	91-120 cm	DM	43658.7	a	a	a
EquivSeg_Total_C_kg_per_ha	2013-11-08	0-7.6 cm	DM + A	26056.6	a	a	a
EquivSeg_Total_C_kg_per_ha	2013-11-08	0-7.6 cm	DM	25400	a	ab	ab
EquivSeg_Total_C_kg_per_ha	2013-11-08	0-7.6 cm	Control	23193	a	ab	ab
EquivSeg_Total_C_kg_per_ha	2013-11-08	0-7.6 cm	SU	22871.7	a	ab	ab
EquivSeg_Total_C_kg_per_ha	2013-11-08	0-7.6 cm	Urea	22552.9	a	b	b
EquivSeg_Total_C_kg_per_ha	2013-11-08	7.6-15 cm	DM + A	25687.6	a	a	a
EquivSeg_Total_C_kg_per_ha	2013-11-08	7.6-15 cm	DM	24697.9	a	a	a
EquivSeg_Total_C_kg_per_ha	2013-11-08	7.6-15 cm	Control	23401.2	a	a	a
EquivSeg_Total_C_kg_per_ha	2013-11-08	7.6-15 cm	SU	23053.3	a	a	a
EquivSeg_Total_C_kg_per_ha	2013-11-08	7.6-15 cm	Urea	22945.6	a	a	a
EquivSeg_Total_C_kg_per_ha	2013-11-08	15-30 cm	DM	49506.7	a	a	a
EquivSeg_Total_C_kg_per_ha	2013-11-08	15-30 cm	SU	49505.9	a	a	a
EquivSeg_Total_C_kg_per_ha	2013-11-08	15-30 cm	DM + A	48729	a	a	a
EquivSeg_Total_C_kg_per_ha	2013-11-08	15-30 cm	Urea	48685.1	a	a	a
EquivSeg_Total_C_kg_per_ha	2013-11-08	15-30 cm	Control	47552	a	a	a
EquivSeg_Total_C_kg_per_ha	2013-11-08	30-61 cm	SU	101495	a	a	a
EquivSeg_Total_C_kg_per_ha	2013-11-08	30-61 cm	Control	98665.7	a	a	a
EquivSeg_Total_C_kg_per_ha	2013-11-08	30-61 cm	DM	97468.6	a	a	a
EquivSeg_Total_C_kg_per_ha	2013-11-08	30-61 cm	Urea	94024	a	a	a
EquivSeg_Total_C_kg_per_ha	2013-11-08	30-61 cm	DM + A	92322.8	a	a	a
EquivSeg_Total_C_kg_per_ha	2013-11-08	61-91 cm	SU	69262.1	a	a	a
EquivSeg_Total_C_kg_per_ha	2013-11-08	61-91 cm	Urea	67332	a	a	a
EquivSeg_Total_C_kg_per_ha	2013-11-08	61-91 cm	DM + A	67079.7	a	a	a
EquivSeg_Total_C_kg_per_ha	2013-11-08	61-91 cm	DM	65135.2	a	a	a
EquivSeg_Total_C_kg_per_ha	2013-11-08	61-91 cm	Control	62753.8	a	a	a
EquivSeg_Total_C_kg_per_ha	2013-11-08	91-120 cm	DM	49192.7	a	a	a
EquivSeg_Total_C_kg_per_ha	2013-11-08	91-120 cm	Urea	48349.5	a	a	a
EquivSeg_Total_C_kg_per_ha	2013-11-08	91-120 cm	Control	46698.1	a	a	a
EquivSeg_Total_C_kg_per_ha	2013-11-08	91-120 cm	SU	46673.9	a	a	a
EquivSeg_Total_C_kg_per_ha	2013-11-08	91-120 cm	DM + A	45896	a	a	a
EquivSeg_Total_C_kg_per_ha	2015-11-24	0-7.6 cm	DM	31526.5	a	a	a
EquivSeg_Total_C_kg_per_ha	2015-11-24	0-7.6 cm	DM + A	27404.1	ab	ab	ab
EquivSeg_Total_C_kg_per_ha	2015-11-24	0-7.6 cm	Urea	24983.5	b	b	b
EquivSeg_Total_C_kg_per_ha	2015-11-24	0-7.6 cm	Control	23686.7	b	b	b
EquivSeg_Total_C_kg_per_ha	2015-11-24	0-7.6 cm	SU	23363.9	b	b	b
EquivSeg_Total_C_kg_per_ha	2015-11-24	7.6-15 cm	DM + A	30296.7	a	a	a
EquivSeg_Total_C_kg_per_ha	2015-11-24	7.6-15 cm	DM	28689.5	a	a	ab
EquivSeg_Total_C_kg_per_ha	2015-11-24	7.6-15 cm	Control	25003.4	a	a	ab
EquivSeg_Total_C_kg_per_ha	2015-11-24	7.6-15 cm	SU	24563.4	a	a	b
EquivSeg_Total_C_kg_per_ha	2015-11-24	7.6-15 cm	Urea	24430.7	a	a	b
EquivSeg_Total_C_kg_per_ha	2015-11-24	15-30 cm	DM	62290.2	a	a	a
EquivSeg_Total_C_kg_per_ha	2015-11-24	15-30 cm	DM + A	56394.5	ab	ab	ab
EquivSeg_Total_C_kg_per_ha	2015-11-24	15-30 cm	Control	53953.1	b	b	b
EquivSeg_Total_C_kg_per_ha	2015-11-24	15-30 cm	SU	52784.6	b	b	b
EquivSeg_Total_C_kg_per_ha	2015-11-24	15-30 cm	Urea	49008.6	b	b	b
EquivSeg_Total_C_kg_per_ha	2015-11-24	30-61 cm	DM	108055	a	a	a
EquivSeg_Total_C_kg_per_ha	2015-11-24	30-61 cm	Urea	105796	a	a	a
EquivSeg_Total_C_kg_per_ha	2015-11-24	30-61 cm	SU	105125	a	a	a
EquivSeg_Total_C_kg_per_ha	2015-11-24	30-61 cm	Control	98554.2	a	a	a
EquivSeg_Total_C_kg_per_ha	2015-11-24	30-61 cm	DM + A	96874	a	a	a
EquivSeg_Total_C_kg_per_ha	2015-11-24	61-91 cm	Control	67565	a	a	a
EquivSeg_Total_C_kg_per_ha	2015-11-24	61-91 cm	DM + A	67491.9	a	a	a
EquivSeg_Total_C_kg_per_ha	2015-11-24	61-91 cm	SU	67158.6	a	a	a
EquivSeg_Total_C_kg_per_ha	2015-11-24	61-91 cm	Urea	66769.5	a	a	a
EquivSeg_Total_C_kg_per_ha	2015-11-24	61-91 cm	DM	66603.2	a	a	a
EquivSeg_Total_C_kg_per_ha	2015-11-24	91-120 cm	DM	51801.7	a	a	a
EquivSeg_Total_C_kg_per_ha	2015-11-24	91-120 cm	Control	50809.2	a	a	a
EquivSeg_Total_C_kg_per_ha	2015-11-24	91-120 cm	SU	50524.4	a	a	a
EquivSeg_Total_C_kg_per_ha	2015-11-24	91-120 cm	DM + A	49391.4	a	a	a
EquivSeg_Total_C_kg_per_ha	2015-11-24	91-120 cm	Urea	46009.4	a	a	a
EquivSeg_Total_C_kg_per_ha	2016-11-16	0-7.6 cm	DM + A	27098.8	a	a	a
EquivSeg_Total_C_kg_per_ha	2016-11-16	0-7.6 cm	DM	26000.9	a	a	a
EquivSeg_Total_C_kg_per_ha	2016-11-16	0-7.6 cm	Control	23600.4	a	a	a
EquivSeg_Total_C_kg_per_ha	2016-11-16	0-7.6 cm	SU	23080.2	a	a	a
EquivSeg_Total_C_kg_per_ha	2016-11-16	0-7.6 cm	Urea	21849.9	a	a	a
EquivSeg_Total_C_kg_per_ha	2016-11-16	7.6-15 cm	DM + A	27481.4	a	a	a
EquivSeg_Total_C_kg_per_ha	2016-11-16	7.6-15 cm	DM	27105.9	a	a	a
EquivSeg_Total_C_kg_per_ha	2016-11-16	7.6-15 cm	Control	23920.4	a	a	a
EquivSeg_Total_C_kg_per_ha	2016-11-16	7.6-15 cm	SU	23048.2	a	a	a
EquivSeg_Total_C_kg_per_ha	2016-11-16	7.6-15 cm	Urea	22651.3	a	a	a
EquivSeg_Total_C_kg_per_ha	2016-11-16	15-30 cm	DM	52316.4	a	a	a
EquivSeg_Total_C_kg_per_ha	2016-11-16	15-30 cm	Control	49570.5	a	a	a
EquivSeg_Total_C_kg_per_ha	2016-11-16	15-30 cm	DM + A	49145.1	a	a	a
EquivSeg_Total_C_kg_per_ha	2016-11-16	15-30 cm	SU	48931.1	a	a	a
EquivSeg_Total_C_kg_per_ha	2016-11-16	15-30 cm	Urea	47482.6	a	a	a
EquivSeg_Total_C_kg_per_ha	2016-11-16	30-61 cm	SU	97126.4	a	a	a
EquivSeg_Total_C_kg_per_ha	2016-11-16	30-61 cm	DM	96641.4	a	a	a
EquivSeg_Total_C_kg_per_ha	2016-11-16	30-61 cm	Urea	93033.2	a	a	a
EquivSeg_Total_C_kg_per_ha	2016-11-16	30-61 cm	DM + A	91469.9	a	a	a
EquivSeg_Total_C_kg_per_ha	2016-11-16	30-61 cm	Control	90161.5	a	a	a
EquivSeg_Total_C_kg_per_ha	2016-11-16	61-91 cm	DM	71636.8	a	a	a
EquivSeg_Total_C_kg_per_ha	2016-11-16	61-91 cm	Control	69720.2	a	a	a
EquivSeg_Total_C_kg_per_ha	2016-11-16	61-91 cm	Urea	68134.9	a	a	a
EquivSeg_Total_C_kg_per_ha	2016-11-16	61-91 cm	DM + A	64039.2	a	a	a
EquivSeg_Total_C_kg_per_ha	2016-11-16	61-91 cm	SU	61784.4	a	a	a
EquivSeg_Total_C_kg_per_ha	2016-11-16	91-120 cm	Control	53825.4	a	a	a
EquivSeg_Total_C_kg_per_ha	2016-11-16	91-120 cm	SU	49829.4	a	a	ab
EquivSeg_Total_C_kg_per_ha	2016-11-16	91-120 cm	DM	49204.2	a	a	ab
EquivSeg_Total_C_kg_per_ha	2016-11-16	91-120 cm	DM + A	48742.4	a	a	ab
EquivSeg_Total_C_kg_per_ha	2016-11-16	91-120 cm	Urea	46357.4	a	a	b
EquivSeg_Total_C_kg_per_ha	2017-11-13	0-7.6 cm	DM + SU	26267.4	a	a	a
EquivSeg_Total_C_kg_per_ha	2017-11-13	0-7.6 cm	DM	26266.9	a	a	a
EquivSeg_Total_C_kg_per_ha	2017-11-13	0-7.6 cm	Urea	22226.3	ab	b	b
EquivSeg_Total_C_kg_per_ha	2017-11-13	0-7.6 cm	Control	21837.9	ab	b	b
EquivSeg_Total_C_kg_per_ha	2017-11-13	0-7.6 cm	SU	21646.1	b	b	b
EquivSeg_Total_C_kg_per_ha	2017-11-13	7.6-15 cm	DM	27642.4	a	a	a
EquivSeg_Total_C_kg_per_ha	2017-11-13	7.6-15 cm	DM + SU	27207	ab	a	a
EquivSeg_Total_C_kg_per_ha	2017-11-13	7.6-15 cm	SU	22765.7	b	b	b
EquivSeg_Total_C_kg_per_ha	2017-11-13	7.6-15 cm	Urea	22699.6	b	b	b
EquivSeg_Total_C_kg_per_ha	2017-11-13	7.6-15 cm	Control	22549.9	b	b	b
EquivSeg_Total_C_kg_per_ha	2017-11-13	15-30 cm	DM + SU	52876.1	a	a	a
EquivSeg_Total_C_kg_per_ha	2017-11-13	15-30 cm	DM	49911.9	a	a	a
EquivSeg_Total_C_kg_per_ha	2017-11-13	15-30 cm	Control	48298	a	a	a
EquivSeg_Total_C_kg_per_ha	2017-11-13	15-30 cm	SU	47569.8	a	a	a
EquivSeg_Total_C_kg_per_ha	2017-11-13	15-30 cm	Urea	46930.1	a	a	a
EquivSeg_Total_C_kg_per_ha	2017-11-13	30-61 cm	DM + SU	103696	a	a	a
EquivSeg_Total_C_kg_per_ha	2017-11-13	30-61 cm	SU	100776	a	a	a
EquivSeg_Total_C_kg_per_ha	2017-11-13	30-61 cm	DM	97222.6	a	a	a
EquivSeg_Total_C_kg_per_ha	2017-11-13	30-61 cm	Control	94656.5	a	a	a
EquivSeg_Total_C_kg_per_ha	2017-11-13	30-61 cm	Urea	94229.1	a	a	a
EquivSeg_Total_C_kg_per_ha	2017-11-13	61-91 cm	SU	66269.8	a	a	a
EquivSeg_Total_C_kg_per_ha	2017-11-13	61-91 cm	Urea	65884.4	a	a	a
EquivSeg_Total_C_kg_per_ha	2017-11-13	61-91 cm	DM	65075.5	a	a	a
EquivSeg_Total_C_kg_per_ha	2017-11-13	61-91 cm	DM + SU	64627.4	a	a	a
EquivSeg_Total_C_kg_per_ha	2017-11-13	61-91 cm	Control	63645.1	a	a	a
EquivSeg_Total_C_kg_per_ha	2017-11-13	91-120 cm	SU	51851	a	a	a
EquivSeg_Total_C_kg_per_ha	2017-11-13	91-120 cm	DM + SU	49102.7	a	a	a
EquivSeg_Total_C_kg_per_ha	2017-11-13	91-120 cm	Control	47778.6	a	a	a
EquivSeg_Total_C_kg_per_ha	2017-11-13	91-120 cm	Urea	46928.7	a	a	a
EquivSeg_Total_C_kg_per_ha	2017-11-13	91-120 cm	DM	46711.7	a	a	a
EquivSeg_Total_N_kg_per_ha	2012-02-01	0-7.6 cm	SU	1554.42	a	a	a
EquivSeg_Total_N_kg_per_ha	2012-02-01	0-7.6 cm	DM	1513.06	a	a	a
EquivSeg_Total_N_kg_per_ha	2012-02-01	0-7.6 cm	Urea	1512.76	a	a	a
EquivSeg_Total_N_kg_per_ha	2012-02-01	0-7.6 cm	DM + A	1491.72	a	a	a
EquivSeg_Total_N_kg_per_ha	2012-02-01	0-7.6 cm	Control	1434.27	a	a	a
EquivSeg_Total_N_kg_per_ha	2012-02-01	7.6-15 cm	DM	1427.64	a	a	a
EquivSeg_Total_N_kg_per_ha	2012-02-01	7.6-15 cm	Urea	1421.59	a	a	a
EquivSeg_Total_N_kg_per_ha	2012-02-01	7.6-15 cm	DM + A	1406.88	a	a	a
EquivSeg_Total_N_kg_per_ha	2012-02-01	7.6-15 cm	Control	1364.8	a	a	a
EquivSeg_Total_N_kg_per_ha	2012-02-01	7.6-15 cm	SU	1335.8	a	a	a
EquivSeg_Total_N_kg_per_ha	2012-02-01	15-30 cm	Control	2937.75	a	a	a
EquivSeg_Total_N_kg_per_ha	2012-02-01	15-30 cm	Urea	2887.78	a	a	a
EquivSeg_Total_N_kg_per_ha	2012-02-01	15-30 cm	DM + A	2824.24	a	a	a
EquivSeg_Total_N_kg_per_ha	2012-02-01	15-30 cm	DM	2820.13	a	a	a
EquivSeg_Total_N_kg_per_ha	2012-02-01	15-30 cm	SU	2671.17	a	a	a
EquivSeg_Total_N_kg_per_ha	2012-02-01	30-61 cm	DM + A	3158.46	a	a	a
EquivSeg_Total_N_kg_per_ha	2012-02-01	30-61 cm	DM	3114.54	a	a	a
EquivSeg_Total_N_kg_per_ha	2012-02-01	30-61 cm	Urea	2979.92	a	a	a
EquivSeg_Total_N_kg_per_ha	2012-02-01	30-61 cm	SU	2895.49	a	a	a
EquivSeg_Total_N_kg_per_ha	2012-02-01	30-61 cm	Control	2803	a	a	a
EquivSeg_Total_N_kg_per_ha	2012-02-01	61-91 cm	SU	2137.08	a	a	a
EquivSeg_Total_N_kg_per_ha	2012-02-01	61-91 cm	Urea	2081.53	a	a	a
EquivSeg_Total_N_kg_per_ha	2012-02-01	61-91 cm	DM	2068.4	a	a	a
EquivSeg_Total_N_kg_per_ha	2012-02-01	61-91 cm	DM + A	1974.56	a	a	a
EquivSeg_Total_N_kg_per_ha	2012-02-01	61-91 cm	Control	1838.95	a	a	a
EquivSeg_Total_N_kg_per_ha	2012-02-01	91-120 cm	DM + A	1667.35	a	a	a
EquivSeg_Total_N_kg_per_ha	2012-02-01	91-120 cm	SU	1650.11	a	a	a
EquivSeg_Total_N_kg_per_ha	2012-02-01	91-120 cm	Urea	1631.15	a	a	a
EquivSeg_Total_N_kg_per_ha	2012-02-01	91-120 cm	DM	1561.14	a	a	a
EquivSeg_Total_N_kg_per_ha	2012-02-01	91-120 cm	Control	1418.8	a	a	a
EquivSeg_Total_N_kg_per_ha	2012-11-16	0-7.6 cm	DM + A	1807.17	a	a	a
EquivSeg_Total_N_kg_per_ha	2012-11-16	0-7.6 cm	DM	1712.52	ab	ab	ab
EquivSeg_Total_N_kg_per_ha	2012-11-16	0-7.6 cm	SU	1519.89	abc	bc	bc
EquivSeg_Total_N_kg_per_ha	2012-11-16	0-7.6 cm	Control	1441.25	bc	c	c
EquivSeg_Total_N_kg_per_ha	2012-11-16	0-7.6 cm	Urea	1419.23	c	c	c
EquivSeg_Total_N_kg_per_ha	2012-11-16	7.6-15 cm	DM + A	1701.89	a	a	a
EquivSeg_Total_N_kg_per_ha	2012-11-16	7.6-15 cm	DM	1617.63	ab	ab	ab
EquivSeg_Total_N_kg_per_ha	2012-11-16	7.6-15 cm	SU	1488.32	ab	ab	ab
EquivSeg_Total_N_kg_per_ha	2012-11-16	7.6-15 cm	Urea	1425.7	ab	b	b
EquivSeg_Total_N_kg_per_ha	2012-11-16	7.6-15 cm	Control	1414.48	b	b	b
EquivSeg_Total_N_kg_per_ha	2012-11-16	15-30 cm	DM + A	3019.26	a	a	a
EquivSeg_Total_N_kg_per_ha	2012-11-16	15-30 cm	DM	2972.68	a	a	a
EquivSeg_Total_N_kg_per_ha	2012-11-16	15-30 cm	SU	2894.17	a	a	a
EquivSeg_Total_N_kg_per_ha	2012-11-16	15-30 cm	Control	2846.2	a	a	a
EquivSeg_Total_N_kg_per_ha	2012-11-16	15-30 cm	Urea	2817.31	a	a	a
EquivSeg_Total_N_kg_per_ha	2012-11-16	30-61 cm	DM + A	3593.13	a	a	a
EquivSeg_Total_N_kg_per_ha	2012-11-16	30-61 cm	Control	3349.75	a	a	a
EquivSeg_Total_N_kg_per_ha	2012-11-16	30-61 cm	SU	3225.53	a	a	a
EquivSeg_Total_N_kg_per_ha	2012-11-16	30-61 cm	DM	3113.72	a	a	a
EquivSeg_Total_N_kg_per_ha	2012-11-16	30-61 cm	Urea	3104.17	a	a	a
EquivSeg_Total_N_kg_per_ha	2012-11-16	61-91 cm	DM + A	2204.65	a	a	a
EquivSeg_Total_N_kg_per_ha	2012-11-16	61-91 cm	SU	2100.71	a	a	a
EquivSeg_Total_N_kg_per_ha	2012-11-16	61-91 cm	DM	2075.33	a	a	a
EquivSeg_Total_N_kg_per_ha	2012-11-16	61-91 cm	Control	2036.36	a	a	a
EquivSeg_Total_N_kg_per_ha	2012-11-16	61-91 cm	Urea	2035.12	a	a	a
EquivSeg_Total_N_kg_per_ha	2012-11-16	91-120 cm	DM + A	1847.46	a	a	a
EquivSeg_Total_N_kg_per_ha	2012-11-16	91-120 cm	DM	1707.14	a	a	a
EquivSeg_Total_N_kg_per_ha	2012-11-16	91-120 cm	Control	1571.8	a	a	a
EquivSeg_Total_N_kg_per_ha	2012-11-16	91-120 cm	SU	1566.84	a	a	a
EquivSeg_Total_N_kg_per_ha	2012-11-16	91-120 cm	Urea	1563.32	a	a	a
EquivSeg_Total_N_kg_per_ha	2013-11-08	0-7.6 cm	DM + A	1992.5	a	a	a
EquivSeg_Total_N_kg_per_ha	2013-11-08	0-7.6 cm	DM	1922.85	ab	a	a
EquivSeg_Total_N_kg_per_ha	2013-11-08	0-7.6 cm	SU	1677.21	bc	b	b
EquivSeg_Total_N_kg_per_ha	2013-11-08	0-7.6 cm	Control	1643.96	c	b	b
EquivSeg_Total_N_kg_per_ha	2013-11-08	0-7.6 cm	Urea	1634.93	c	b	b
EquivSeg_Total_N_kg_per_ha	2013-11-08	7.6-15 cm	DM + A	1940.13	a	a	a
EquivSeg_Total_N_kg_per_ha	2013-11-08	7.6-15 cm	DM	1836.62	ab	ab	ab
EquivSeg_Total_N_kg_per_ha	2013-11-08	7.6-15 cm	Control	1709.38	ab	b	bc
EquivSeg_Total_N_kg_per_ha	2013-11-08	7.6-15 cm	SU	1661.61	b	b	bc
EquivSeg_Total_N_kg_per_ha	2013-11-08	7.6-15 cm	Urea	1637.26	b	b	c
EquivSeg_Total_N_kg_per_ha	2013-11-08	15-30 cm	Control	3426	a	a	a
EquivSeg_Total_N_kg_per_ha	2013-11-08	15-30 cm	DM + A	3404.42	a	a	a
EquivSeg_Total_N_kg_per_ha	2013-11-08	15-30 cm	SU	3373.67	a	a	a
EquivSeg_Total_N_kg_per_ha	2013-11-08	15-30 cm	DM	3350.53	a	a	a
EquivSeg_Total_N_kg_per_ha	2013-11-08	15-30 cm	Urea	3290.28	a	a	a
EquivSeg_Total_N_kg_per_ha	2013-11-08	30-61 cm	DM + A	4283.47	a	a	a
EquivSeg_Total_N_kg_per_ha	2013-11-08	30-61 cm	SU	4252.79	a	a	a
EquivSeg_Total_N_kg_per_ha	2013-11-08	30-61 cm	Urea	4155.65	a	a	a
EquivSeg_Total_N_kg_per_ha	2013-11-08	30-61 cm	Control	4123.33	a	a	a
EquivSeg_Total_N_kg_per_ha	2013-11-08	30-61 cm	DM	3904.46	a	a	a
EquivSeg_Total_N_kg_per_ha	2013-11-08	61-91 cm	Control	3010.05	a	a	a
EquivSeg_Total_N_kg_per_ha	2013-11-08	61-91 cm	SU	2951.73	a	a	a
EquivSeg_Total_N_kg_per_ha	2013-11-08	61-91 cm	Urea	2879.71	a	a	a
EquivSeg_Total_N_kg_per_ha	2013-11-08	61-91 cm	DM + A	2781.66	a	a	a
EquivSeg_Total_N_kg_per_ha	2013-11-08	61-91 cm	DM	2772.98	a	a	a
EquivSeg_Total_N_kg_per_ha	2013-11-08	91-120 cm	Control	2573.96	a	a	a
EquivSeg_Total_N_kg_per_ha	2013-11-08	91-120 cm	Urea	2552.86	a	a	a
EquivSeg_Total_N_kg_per_ha	2013-11-08	91-120 cm	SU	2520.3	a	a	a
EquivSeg_Total_N_kg_per_ha	2013-11-08	91-120 cm	DM + A	2456.79	a	a	a
EquivSeg_Total_N_kg_per_ha	2013-11-08	91-120 cm	DM	2436.42	a	a	a
EquivSeg_Total_N_kg_per_ha	2015-11-24	0-7.6 cm	DM	2219.05	a	a	a
EquivSeg_Total_N_kg_per_ha	2015-11-24	0-7.6 cm	DM + A	1787.49	ab	ab	ab
EquivSeg_Total_N_kg_per_ha	2015-11-24	0-7.6 cm	Urea	1584.45	b	b	b
EquivSeg_Total_N_kg_per_ha	2015-11-24	0-7.6 cm	Control	1496.55	b	b	b
EquivSeg_Total_N_kg_per_ha	2015-11-24	0-7.6 cm	SU	1493.03	b	b	b
EquivSeg_Total_N_kg_per_ha	2015-11-24	7.6-15 cm	DM + A	2084.17	a	a	a
EquivSeg_Total_N_kg_per_ha	2015-11-24	7.6-15 cm	DM	1998.39	ab	ab	ab
EquivSeg_Total_N_kg_per_ha	2015-11-24	7.6-15 cm	Urea	1694.42	abc	bc	bc
EquivSeg_Total_N_kg_per_ha	2015-11-24	7.6-15 cm	Control	1604.98	bc	c	c
EquivSeg_Total_N_kg_per_ha	2015-11-24	7.6-15 cm	SU	1568.2	c	c	c
EquivSeg_Total_N_kg_per_ha	2015-11-24	15-30 cm	DM	4037.7	a	a	a
EquivSeg_Total_N_kg_per_ha	2015-11-24	15-30 cm	SU	3426.41	ab	ab	ab
EquivSeg_Total_N_kg_per_ha	2015-11-24	15-30 cm	DM + A	3343.98	ab	ab	b
EquivSeg_Total_N_kg_per_ha	2015-11-24	15-30 cm	Control	3224	b	b	b
EquivSeg_Total_N_kg_per_ha	2015-11-24	15-30 cm	Urea	3186.5	b	b	b
EquivSeg_Total_N_kg_per_ha	2015-11-24	30-61 cm	SU	3671.19	a	a	a
EquivSeg_Total_N_kg_per_ha	2015-11-24	30-61 cm	DM	3490.71	a	a	a
EquivSeg_Total_N_kg_per_ha	2015-11-24	30-61 cm	Urea	3442.8	a	a	a
EquivSeg_Total_N_kg_per_ha	2015-11-24	30-61 cm	DM + A	3414.44	a	a	a
EquivSeg_Total_N_kg_per_ha	2015-11-24	30-61 cm	Control	3304.74	a	a	a
EquivSeg_Total_N_kg_per_ha	2015-11-24	61-91 cm	DM	2257.64	a	a	a
EquivSeg_Total_N_kg_per_ha	2015-11-24	61-91 cm	Urea	2245.36	a	a	a
EquivSeg_Total_N_kg_per_ha	2015-11-24	61-91 cm	SU	2129.4	a	a	a
EquivSeg_Total_N_kg_per_ha	2015-11-24	61-91 cm	DM + A	2026.28	a	a	a
EquivSeg_Total_N_kg_per_ha	2015-11-24	61-91 cm	Control	2005.86	a	a	a
EquivSeg_Total_N_kg_per_ha	2015-11-24	91-120 cm	DM	1803.43	a	a	a
EquivSeg_Total_N_kg_per_ha	2015-11-24	91-120 cm	Control	1776.94	a	a	a
EquivSeg_Total_N_kg_per_ha	2015-11-24	91-120 cm	Urea	1622.15	a	a	a
EquivSeg_Total_N_kg_per_ha	2015-11-24	91-120 cm	DM + A	1547.8	a	a	a
EquivSeg_Total_N_kg_per_ha	2015-11-24	91-120 cm	SU	1526.77	a	a	a
EquivSeg_Total_N_kg_per_ha	2016-11-16	0-7.6 cm	DM + A	1872.59	a	a	a
EquivSeg_Total_N_kg_per_ha	2016-11-16	0-7.6 cm	DM	1746.56	ab	ab	ab
EquivSeg_Total_N_kg_per_ha	2016-11-16	0-7.6 cm	Control	1541.91	ab	ab	ab
EquivSeg_Total_N_kg_per_ha	2016-11-16	0-7.6 cm	SU	1449.71	ab	ab	ab
EquivSeg_Total_N_kg_per_ha	2016-11-16	0-7.6 cm	Urea	1322.08	b	b	b
EquivSeg_Total_N_kg_per_ha	2016-11-16	7.6-15 cm	DM + A	1892.08	a	a	a
EquivSeg_Total_N_kg_per_ha	2016-11-16	7.6-15 cm	DM	1805.34	ab	ab	ab
EquivSeg_Total_N_kg_per_ha	2016-11-16	7.6-15 cm	Control	1482.74	bc	bc	bc
EquivSeg_Total_N_kg_per_ha	2016-11-16	7.6-15 cm	SU	1419.75	bc	c	c
EquivSeg_Total_N_kg_per_ha	2016-11-16	7.6-15 cm	Urea	1390.52	c	c	c
EquivSeg_Total_N_kg_per_ha	2016-11-16	15-30 cm	DM	3135.62	a	a	a
EquivSeg_Total_N_kg_per_ha	2016-11-16	15-30 cm	DM + A	2814.66	a	a	a
EquivSeg_Total_N_kg_per_ha	2016-11-16	15-30 cm	Control	2755.59	a	a	a
EquivSeg_Total_N_kg_per_ha	2016-11-16	15-30 cm	Urea	2498.71	a	a	a
EquivSeg_Total_N_kg_per_ha	2016-11-16	15-30 cm	SU	2446.04	a	a	a
EquivSeg_Total_N_kg_per_ha	2016-11-16	30-61 cm	DM + A	3020.06	a	a	a
EquivSeg_Total_N_kg_per_ha	2016-11-16	30-61 cm	DM	2968.57	a	a	a
EquivSeg_Total_N_kg_per_ha	2016-11-16	30-61 cm	SU	2822.27	a	a	a
EquivSeg_Total_N_kg_per_ha	2016-11-16	30-61 cm	Urea	2756.42	a	a	a
EquivSeg_Total_N_kg_per_ha	2016-11-16	30-61 cm	Control	2720.47	a	a	a
EquivSeg_Total_N_kg_per_ha	2016-11-16	61-91 cm	DM	2000.37	a	a	a
EquivSeg_Total_N_kg_per_ha	2016-11-16	61-91 cm	Urea	1899.49	a	a	a
EquivSeg_Total_N_kg_per_ha	2016-11-16	61-91 cm	SU	1785.18	a	a	a
EquivSeg_Total_N_kg_per_ha	2016-11-16	61-91 cm	DM + A	1774.53	a	a	a
EquivSeg_Total_N_kg_per_ha	2016-11-16	61-91 cm	Control	1690.8	a	a	a
EquivSeg_Total_N_kg_per_ha	2016-11-16	91-120 cm	DM + A	1493.42	a	a	a
EquivSeg_Total_N_kg_per_ha	2016-11-16	91-120 cm	Control	1456.3	a	a	a
EquivSeg_Total_N_kg_per_ha	2016-11-16	91-120 cm	DM	1411.11	a	a	a
EquivSeg_Total_N_kg_per_ha	2016-11-16	91-120 cm	SU	1318.44	a	a	a
EquivSeg_Total_N_kg_per_ha	2016-11-16	91-120 cm	Urea	1266.2	a	a	a
EquivSeg_Total_N_kg_per_ha	2017-11-13	0-7.6 cm	DM	1880.65	a	a	a
EquivSeg_Total_N_kg_per_ha	2017-11-13	0-7.6 cm	DM + SU	1871.12	a	a	a
EquivSeg_Total_N_kg_per_ha	2017-11-13	0-7.6 cm	Urea	1436.33	b	b	b
EquivSeg_Total_N_kg_per_ha	2017-11-13	0-7.6 cm	SU	1399.19	b	b	b
EquivSeg_Total_N_kg_per_ha	2017-11-13	0-7.6 cm	Control	1386.07	b	b	b
EquivSeg_Total_N_kg_per_ha	2017-11-13	7.6-15 cm	DM	1963.08	a	a	a
EquivSeg_Total_N_kg_per_ha	2017-11-13	7.6-15 cm	DM + SU	1917.33	a	a	a
EquivSeg_Total_N_kg_per_ha	2017-11-13	7.6-15 cm	SU	1501.59	b	b	b
EquivSeg_Total_N_kg_per_ha	2017-11-13	7.6-15 cm	Urea	1472.6	b	b	b
EquivSeg_Total_N_kg_per_ha	2017-11-13	7.6-15 cm	Control	1427.21	b	b	b
EquivSeg_Total_N_kg_per_ha	2017-11-13	15-30 cm	DM + SU	3119.15	a	a	a
EquivSeg_Total_N_kg_per_ha	2017-11-13	15-30 cm	DM	3010.21	a	a	a
EquivSeg_Total_N_kg_per_ha	2017-11-13	15-30 cm	SU	2869.44	a	a	a
EquivSeg_Total_N_kg_per_ha	2017-11-13	15-30 cm	Control	2845.39	a	a	a
EquivSeg_Total_N_kg_per_ha	2017-11-13	15-30 cm	Urea	2826.04	a	a	a
EquivSeg_Total_N_kg_per_ha	2017-11-13	30-61 cm	DM	3645.73	a	a	a
EquivSeg_Total_N_kg_per_ha	2017-11-13	30-61 cm	SU	3438.85	a	a	a
EquivSeg_Total_N_kg_per_ha	2017-11-13	30-61 cm	DM + SU	3341.39	a	a	a
EquivSeg_Total_N_kg_per_ha	2017-11-13	30-61 cm	Control	3302.39	a	a	a
EquivSeg_Total_N_kg_per_ha	2017-11-13	30-61 cm	Urea	3180.16	a	a	a
EquivSeg_Total_N_kg_per_ha	2017-11-13	61-91 cm	Urea	2061.28	a	a	a
EquivSeg_Total_N_kg_per_ha	2017-11-13	61-91 cm	SU	1978.9	a	a	a
EquivSeg_Total_N_kg_per_ha	2017-11-13	61-91 cm	Control	1945.07	a	a	a
EquivSeg_Total_N_kg_per_ha	2017-11-13	61-91 cm	DM	1942.01	a	a	a
EquivSeg_Total_N_kg_per_ha	2017-11-13	61-91 cm	DM + SU	1911.85	a	a	a
EquivSeg_Total_N_kg_per_ha	2017-11-13	91-120 cm	DM	1621.45	a	a	a
EquivSeg_Total_N_kg_per_ha	2017-11-13	91-120 cm	Urea	1583.66	a	a	a
EquivSeg_Total_N_kg_per_ha	2017-11-13	91-120 cm	Control	1556.14	a	a	a
EquivSeg_Total_N_kg_per_ha	2017-11-13	91-120 cm	SU	1524.85	a	a	a
EquivSeg_Total_N_kg_per_ha	2017-11-13	91-120 cm	DM + SU	1487.92	a	a	a
Extractable_P_pct	2012-02-01	0-7.6 cm	DM	0.00378762	a	a	a
Extractable_P_pct	2012-02-01	0-7.6 cm	Control	0.00206979	ab	ab	ab
Extractable_P_pct	2012-02-01	0-7.6 cm	DM + A	0.00174034	ab	b	b
Extractable_P_pct	2012-02-01	0-7.6 cm	Urea	0.00168805	ab	b	b
Extractable_P_pct	2012-02-01	0-7.6 cm	SU	0.00139362	b	b	b
Extractable_P_pct	2012-02-01	7.6-15 cm	DM	0.000355991	a	a	a
Extractable_P_pct	2012-02-01	7.6-15 cm	Urea	0.000350484	a	a	a
Extractable_P_pct	2012-02-01	7.6-15 cm	DM + A	0.000327767	a	a	a
Extractable_P_pct	2012-02-01	7.6-15 cm	Control	0.000297329	a	a	a
Extractable_P_pct	2012-02-01	7.6-15 cm	SU	0.000277076	a	a	a
Extractable_P_pct	2012-02-01	15-30 cm	DM + A	0.000227268	a	a	a
Extractable_P_pct	2012-02-01	15-30 cm	SU	0.00015995	a	a	a
Extractable_P_pct	2012-02-01	15-30 cm	DM	0.000151833	a	a	a
Extractable_P_pct	2012-02-01	15-30 cm	Urea	0.000150119	a	a	a
Extractable_P_pct	2012-02-01	15-30 cm	Control	0.000148997	a	a	a
Extractable_P_pct	2012-11-16	0-7.6 cm	DM + A	0.00720663	a	a	a
Extractable_P_pct	2012-11-16	0-7.6 cm	DM	0.00547279	a	a	a
Extractable_P_pct	2012-11-16	0-7.6 cm	SU	0.000939215	b	b	b
Extractable_P_pct	2012-11-16	0-7.6 cm	Control	0.000912173	b	b	b
Extractable_P_pct	2012-11-16	0-7.6 cm	Urea	0.00070706	b	b	b
Extractable_P_pct	2012-11-16	7.6-15 cm	DM + A	0.00471742	a	a	a
Extractable_P_pct	2012-11-16	7.6-15 cm	DM	0.00315056	ab	ab	ab
Extractable_P_pct	2012-11-16	7.6-15 cm	SU	0.000520369	b	b	b
Extractable_P_pct	2012-11-16	7.6-15 cm	Control	0.000454287	b	b	b
Extractable_P_pct	2012-11-16	7.6-15 cm	Urea	0.000347222	b	b	b
Extractable_P_pct	2012-11-16	15-30 cm	DM + A	0.000471896	a	a	a
Extractable_P_pct	2012-11-16	15-30 cm	DM	0.000277192	a	ab	ab
Extractable_P_pct	2012-11-16	15-30 cm	SU	0.000254321	a	ab	b
Extractable_P_pct	2012-11-16	15-30 cm	Control	0.000251458	a	ab	b
Extractable_P_pct	2012-11-16	15-30 cm	Urea	0.000232229	a	b	b
Extractable_P_pct	2013-11-08	0-7.6 cm	DM + A	0.00915859	a	a	a
Extractable_P_pct	2013-11-08	0-7.6 cm	DM	0.00754696	a	a	a
Extractable_P_pct	2013-11-08	0-7.6 cm	SU	0.00180952	b	b	b
Extractable_P_pct	2013-11-08	0-7.6 cm	Urea	0.0013594	b	b	b
Extractable_P_pct	2013-11-08	0-7.6 cm	Control	0.00133986	b	b	b
Extractable_P_pct	2013-11-08	7.6-15 cm	DM	0.00816982	a	a	a
Extractable_P_pct	2013-11-08	7.6-15 cm	DM + A	0.00757669	a	a	a
Extractable_P_pct	2013-11-08	7.6-15 cm	SU	0.00122541	b	b	b
Extractable_P_pct	2013-11-08	7.6-15 cm	Urea	0.000813848	b	b	b
Extractable_P_pct	2013-11-08	7.6-15 cm	Control	0.000644296	b	b	b
Extractable_P_pct	2013-11-08	15-30 cm	DM	0.000516851	a	a	a
Extractable_P_pct	2013-11-08	15-30 cm	DM + A	0.000358507	a	a	a
Extractable_P_pct	2013-11-08	15-30 cm	Urea	0.000212653	a	a	a
Extractable_P_pct	2013-11-08	15-30 cm	SU	0.000180054	a	a	a
Extractable_P_pct	2013-11-08	15-30 cm	Control	0.000167521	a	a	a
Extractable_P_pct	2016-11-16	0-7.6 cm	DM + A	0.0102897	a	a	a
Extractable_P_pct	2016-11-16	0-7.6 cm	DM	0.010193	a	a	a
Extractable_P_pct	2016-11-16	0-7.6 cm	SU	0.00158076	b	b	b
Extractable_P_pct	2016-11-16	0-7.6 cm	Control	0.00150093	b	b	b
Extractable_P_pct	2016-11-16	0-7.6 cm	Urea	0.000873904	b	b	b
Extractable_P_pct	2016-11-16	7.6-15 cm	DM + A	0.0100481	a	a	a
Extractable_P_pct	2016-11-16	7.6-15 cm	DM	0.00972068	a	a	a
Extractable_P_pct	2016-11-16	7.6-15 cm	Control	0.00110569	b	b	b
Extractable_P_pct	2016-11-16	7.6-15 cm	Urea	0.000560918	b	b	b
Extractable_P_pct	2016-11-16	7.6-15 cm	SU	0.000489193	b	b	b
Extractable_P_pct	2016-11-16	15-30 cm	DM	0.000703261	a	a	a
Extractable_P_pct	2016-11-16	15-30 cm	DM + A	0.000519444	ab	ab	ab
Extractable_P_pct	2016-11-16	15-30 cm	Urea	0.000191697	b	b	b
Extractable_P_pct	2016-11-16	15-30 cm	SU	0.000179627	b	b	b
Extractable_P_pct	2016-11-16	15-30 cm	Control	0.000174504	b	b	b
Inorganic_C_pct	2012-02-01	0-7.6 cm	Control	1.02307	a	a	a
Inorganic_C_pct	2012-02-01	0-7.6 cm	SU	1.02052	a	a	a
Inorganic_C_pct	2012-02-01	0-7.6 cm	Urea	1.01919	a	a	a
Inorganic_C_pct	2012-02-01	0-7.6 cm	DM	1.01121	a	a	a
Inorganic_C_pct	2012-02-01	0-7.6 cm	DM + A	0.997536	a	a	a
Inorganic_C_pct	2012-02-01	7.6-15 cm	SU	1.05136	a	a	a
Inorganic_C_pct	2012-02-01	7.6-15 cm	Control	1.04842	a	a	a
Inorganic_C_pct	2012-02-01	7.6-15 cm	Urea	1.04385	a	a	a
Inorganic_C_pct	2012-02-01	7.6-15 cm	DM + A	1.03897	a	a	a
Inorganic_C_pct	2012-02-01	7.6-15 cm	DM	1.03629	a	a	a
Inorganic_C_pct	2012-02-01	15-30 cm	Urea	1.22785	a	a	a
Inorganic_C_pct	2012-02-01	15-30 cm	DM	1.15882	a	a	a
Inorganic_C_pct	2012-02-01	15-30 cm	DM + A	1.15711	a	a	a
Inorganic_C_pct	2012-02-01	15-30 cm	Control	1.14434	a	a	a
Inorganic_C_pct	2012-02-01	15-30 cm	SU	1.13972	a	a	a
Inorganic_C_pct	2012-02-01	30-61 cm	Control	1.59939	a	a	a
Inorganic_C_pct	2012-02-01	30-61 cm	DM	1.593	a	a	a
Inorganic_C_pct	2012-02-01	30-61 cm	SU	1.50228	a	a	a
Inorganic_C_pct	2012-02-01	30-61 cm	DM + A	1.49842	a	a	a
Inorganic_C_pct	2012-02-01	30-61 cm	Urea	1.26892	a	a	a
Inorganic_C_pct	2012-02-01	61-91 cm	Control	1.28279	a	a	a
Inorganic_C_pct	2012-02-01	61-91 cm	SU	1.26314	a	a	a
Inorganic_C_pct	2012-02-01	61-91 cm	DM	1.23934	a	a	a
Inorganic_C_pct	2012-02-01	61-91 cm	DM + A	1.2023	a	a	a
Inorganic_C_pct	2012-02-01	61-91 cm	Urea	1.1525	a	a	a
Inorganic_C_pct	2012-02-01	91-120 cm	SU	0.984225	a	a	a
Inorganic_C_pct	2012-02-01	91-120 cm	Control	0.937087	a	a	a
Inorganic_C_pct	2012-02-01	91-120 cm	DM	0.925059	a	a	a
Inorganic_C_pct	2012-02-01	91-120 cm	Urea	0.90847	a	a	a
Inorganic_C_pct	2012-02-01	91-120 cm	DM + A	0.88712	a	a	a
Inorganic_C_pct	2012-11-16	0-7.6 cm	Urea	1.05546	a	a	a
Inorganic_C_pct	2012-11-16	0-7.6 cm	DM	1.05487	a	a	a
Inorganic_C_pct	2012-11-16	0-7.6 cm	SU	1.04291	a	a	a
Inorganic_C_pct	2012-11-16	0-7.6 cm	DM + A	1.03494	a	a	a
Inorganic_C_pct	2012-11-16	0-7.6 cm	Control	1.02532	a	a	a
Inorganic_C_pct	2012-11-16	7.6-15 cm	Urea	1.07756	a	a	a
Inorganic_C_pct	2012-11-16	7.6-15 cm	Control	1.06819	a	a	a
Inorganic_C_pct	2012-11-16	7.6-15 cm	DM + A	1.0628	a	a	a
Inorganic_C_pct	2012-11-16	7.6-15 cm	DM	1.04203	a	a	a
Inorganic_C_pct	2012-11-16	7.6-15 cm	SU	1.03724	a	a	a
Inorganic_C_pct	2012-11-16	15-30 cm	Urea	1.20258	a	a	a
Inorganic_C_pct	2012-11-16	15-30 cm	SU	1.1661	a	a	a
Inorganic_C_pct	2012-11-16	15-30 cm	DM	1.16471	a	a	a
Inorganic_C_pct	2012-11-16	15-30 cm	DM + A	1.13869	a	a	a
Inorganic_C_pct	2012-11-16	15-30 cm	Control	1.1062	a	a	a
Inorganic_C_pct	2012-11-16	30-61 cm	Control	1.66223	a	a	a
Inorganic_C_pct	2012-11-16	30-61 cm	Urea	1.58912	a	a	a
Inorganic_C_pct	2012-11-16	30-61 cm	SU	1.52368	a	a	a
Inorganic_C_pct	2012-11-16	30-61 cm	DM + A	1.44078	a	a	a
Inorganic_C_pct	2012-11-16	30-61 cm	DM	1.43607	a	a	a
Inorganic_C_pct	2012-11-16	61-91 cm	Control	1.28075	a	a	a
Inorganic_C_pct	2012-11-16	61-91 cm	DM + A	1.27565	a	a	a
Inorganic_C_pct	2012-11-16	61-91 cm	SU	1.26556	a	a	a
Inorganic_C_pct	2012-11-16	61-91 cm	DM	1.20803	a	a	a
Inorganic_C_pct	2012-11-16	61-91 cm	Urea	1.16576	a	a	a
Inorganic_C_pct	2012-11-16	91-120 cm	SU	0.962438	a	a	a
Inorganic_C_pct	2012-11-16	91-120 cm	DM + A	0.95415	a	a	a
Inorganic_C_pct	2012-11-16	91-120 cm	Control	0.923777	a	a	a
Inorganic_C_pct	2012-11-16	91-120 cm	Urea	0.918813	a	a	a
Inorganic_C_pct	2012-11-16	91-120 cm	DM	0.852783	a	a	a
Inorganic_C_pct	2013-11-08	0-7.6 cm	SU	1.0214	a	a	a
Inorganic_C_pct	2013-11-08	0-7.6 cm	Control	1.0063	a	a	a
Inorganic_C_pct	2013-11-08	0-7.6 cm	DM	1.00476	a	a	a
Inorganic_C_pct	2013-11-08	0-7.6 cm	DM + A	0.988382	a	a	a
Inorganic_C_pct	2013-11-08	0-7.6 cm	Urea	0.987045	a	a	a
Inorganic_C_pct	2013-11-08	7.6-15 cm	DM	1.01947	a	a	a
Inorganic_C_pct	2013-11-08	7.6-15 cm	Control	1.01182	a	a	a
Inorganic_C_pct	2013-11-08	7.6-15 cm	SU	1.00694	a	a	a
Inorganic_C_pct	2013-11-08	7.6-15 cm	DM + A	0.969288	a	a	a
Inorganic_C_pct	2013-11-08	7.6-15 cm	Urea	0.960995	a	a	a
Inorganic_C_pct	2013-11-08	15-30 cm	DM	1.0773	a	a	a
Inorganic_C_pct	2013-11-08	15-30 cm	SU	1.07683	a	a	a
Inorganic_C_pct	2013-11-08	15-30 cm	Urea	1.07538	a	a	a
Inorganic_C_pct	2013-11-08	15-30 cm	DM + A	1.03086	a	a	a
Inorganic_C_pct	2013-11-08	15-30 cm	Control	1.00619	a	a	a
Inorganic_C_pct	2013-11-08	30-61 cm	SU	1.69858	a	a	a
Inorganic_C_pct	2013-11-08	30-61 cm	DM	1.58569	a	a	a
Inorganic_C_pct	2013-11-08	30-61 cm	Control	1.5855	a	a	a
Inorganic_C_pct	2013-11-08	30-61 cm	Urea	1.54207	a	a	a
Inorganic_C_pct	2013-11-08	30-61 cm	DM + A	1.44188	a	a	a
Inorganic_C_pct	2013-11-08	61-91 cm	DM + A	1.27739	a	a	a
Inorganic_C_pct	2013-11-08	61-91 cm	SU	1.27428	a	a	a
Inorganic_C_pct	2013-11-08	61-91 cm	Control	1.20999	a	a	a
Inorganic_C_pct	2013-11-08	61-91 cm	DM	1.20863	a	a	a
Inorganic_C_pct	2013-11-08	61-91 cm	Urea	1.19679	a	a	a
Inorganic_C_pct	2013-11-08	91-120 cm	DM	0.923169	a	a	a
Inorganic_C_pct	2013-11-08	91-120 cm	SU	0.889817	a	a	a
Inorganic_C_pct	2013-11-08	91-120 cm	Urea	0.889158	a	a	a
Inorganic_C_pct	2013-11-08	91-120 cm	Control	0.871132	a	a	a
Inorganic_C_pct	2013-11-08	91-120 cm	DM + A	0.861957	a	a	a
Inorganic_C_pct	2015-11-24	0-7.6 cm	Urea	1.23627	a	a	a
Inorganic_C_pct	2015-11-24	0-7.6 cm	Control	1.23107	a	a	a
Inorganic_C_pct	2015-11-24	0-7.6 cm	SU	1.2268	a	a	a
Inorganic_C_pct	2015-11-24	0-7.6 cm	DM + A	1.20834	a	a	a
Inorganic_C_pct	2015-11-24	0-7.6 cm	DM	1.1662	a	a	a
Inorganic_C_pct	2015-11-24	7.6-15 cm	Control	1.25308	a	a	a
Inorganic_C_pct	2015-11-24	7.6-15 cm	DM + A	1.24006	a	a	a
Inorganic_C_pct	2015-11-24	7.6-15 cm	Urea	1.23107	a	a	a
Inorganic_C_pct	2015-11-24	7.6-15 cm	SU	1.21994	a	a	a
Inorganic_C_pct	2015-11-24	7.6-15 cm	DM	1.1823	a	a	a
Inorganic_C_pct	2015-11-24	15-30 cm	Urea	1.3402	a	a	a
Inorganic_C_pct	2015-11-24	15-30 cm	DM + A	1.33855	a	a	a
Inorganic_C_pct	2015-11-24	15-30 cm	SU	1.33239	a	a	a
Inorganic_C_pct	2015-11-24	15-30 cm	Control	1.317	a	a	a
Inorganic_C_pct	2015-11-24	15-30 cm	DM	1.28528	a	a	a
Inorganic_C_pct	2015-11-24	30-61 cm	Urea	1.97443	a	a	a
Inorganic_C_pct	2015-11-24	30-61 cm	DM	1.96614	a	a	a
Inorganic_C_pct	2015-11-24	30-61 cm	SU	1.90128	a	a	a
Inorganic_C_pct	2015-11-24	30-61 cm	DM + A	1.80895	a	a	a
Inorganic_C_pct	2015-11-24	30-61 cm	Control	1.80895	a	a	a
Inorganic_C_pct	2015-11-24	61-91 cm	DM + A	1.47065	a	a	a
Inorganic_C_pct	2015-11-24	61-91 cm	Control	1.45763	a	a	a
Inorganic_C_pct	2015-11-24	61-91 cm	DM	1.44366	a	a	a
Inorganic_C_pct	2015-11-24	61-91 cm	SU	1.43679	a	a	a
Inorganic_C_pct	2015-11-24	61-91 cm	Urea	1.43324	a	a	a
Inorganic_C_pct	2015-11-24	91-120 cm	DM	1.15649	a	a	a
Inorganic_C_pct	2015-11-24	91-120 cm	SU	1.14205	a	a	a
[truncated: 423 more rows]

## Sheet: Dataset
Sampling_Date	Plot	Plot_Suffix	Block	Treatment_Level	Depth_Segment	Response_Variable	Response_Value	Column1
2012-02-01	85	A	85	DM + A	0-7.6 cm	Ammonium_N_kg_per_ha	5.13131
2012-02-01	85	B	85	DM	0-7.6 cm	Ammonium_N_kg_per_ha	4.86994
2012-02-01	85	C	85	Urea	0-7.6 cm	Ammonium_N_kg_per_ha	6.24078
2012-02-01	85	D	85	SU	0-7.6 cm	Ammonium_N_kg_per_ha	5.54736
2012-02-01	85	E	85	Control	0-7.6 cm	Ammonium_N_kg_per_ha	6.03748
2012-02-01	86	A	86	DM	0-7.6 cm	Ammonium_N_kg_per_ha	8.83971
2012-02-01	86	B	86	DM + A	0-7.6 cm	Ammonium_N_kg_per_ha	4.98493
2012-02-01	86	C	86	SU	0-7.6 cm	Ammonium_N_kg_per_ha	4.01786
2012-02-01	86	D	86	Urea	0-7.6 cm	Ammonium_N_kg_per_ha	3.70713
2012-02-01	86	E	86	Control	0-7.6 cm	Ammonium_N_kg_per_ha	3.15231
2012-02-01	88	A	88	SU	0-7.6 cm	Ammonium_N_kg_per_ha	4.26187
2012-02-01	88	B	88	Urea	0-7.6 cm	Ammonium_N_kg_per_ha	3.56251
2012-02-01	88	C	88	Control	0-7.6 cm	Ammonium_N_kg_per_ha	3.19507
2012-02-01	88	D	88	DM + A	0-7.6 cm	Ammonium_N_kg_per_ha	3.00337
2012-02-01	88	E	88	DM	0-7.6 cm	Ammonium_N_kg_per_ha	2.76906
2012-02-01	89	A	89	Control	0-7.6 cm	Ammonium_N_kg_per_ha	2.68834
2012-02-01	89	B	89	Urea	0-7.6 cm	Ammonium_N_kg_per_ha	2.92257
2012-02-01	89	C	89	SU	0-7.6 cm	Ammonium_N_kg_per_ha	4.91013
2012-02-01	89	D	89	DM	0-7.6 cm	Ammonium_N_kg_per_ha	3.54121
2012-02-01	89	E	89	DM + A	0-7.6 cm	Ammonium_N_kg_per_ha	3.30158
2012-02-01	85	A	85	DM + A	7.6-15 cm	Ammonium_N_kg_per_ha	5.715
2012-02-01	85	B	85	DM	7.6-15 cm	Ammonium_N_kg_per_ha	8.74395
2012-02-01	85	C	85	Urea	7.6-15 cm	Ammonium_N_kg_per_ha	6.10488
2012-02-01	85	D	85	SU	7.6-15 cm	Ammonium_N_kg_per_ha	9.2429
2012-02-01	85	E	85	Control	7.6-15 cm	Ammonium_N_kg_per_ha	8.7013
2012-02-01	86	A	86	DM	7.6-15 cm	Ammonium_N_kg_per_ha	7.24597
2012-02-01	86	B	86	DM + A	7.6-15 cm	Ammonium_N_kg_per_ha	4.99801
2012-02-01	86	C	86	SU	7.6-15 cm	Ammonium_N_kg_per_ha	4.21195
2012-02-01	86	D	86	Urea	7.6-15 cm	Ammonium_N_kg_per_ha	3.7553
2012-02-01	86	E	86	Control	7.6-15 cm	Ammonium_N_kg_per_ha	3.31451
2012-02-01	88	A	88	SU	7.6-15 cm	Ammonium_N_kg_per_ha	4.6463
2012-02-01	88	B	88	Urea	7.6-15 cm	Ammonium_N_kg_per_ha	4.48232
2012-02-01	88	C	88	Control	7.6-15 cm	Ammonium_N_kg_per_ha	3.84619
2012-02-01	88	D	88	DM + A	7.6-15 cm	Ammonium_N_kg_per_ha	2.88698
2012-02-01	88	E	88	DM	7.6-15 cm	Ammonium_N_kg_per_ha	3.47487
2012-02-01	89	A	89	Control	7.6-15 cm	Ammonium_N_kg_per_ha	3.30306
2012-02-01	89	B	89	Urea	7.6-15 cm	Ammonium_N_kg_per_ha	4.72769
2012-02-01	89	C	89	SU	7.6-15 cm	Ammonium_N_kg_per_ha	4.29197
2012-02-01	89	D	89	DM	7.6-15 cm	Ammonium_N_kg_per_ha	4.6463
2012-02-01	89	E	89	DM + A	7.6-15 cm	Ammonium_N_kg_per_ha	4.07479
2012-02-01	85	A	85	DM + A	15-30 cm	Ammonium_N_kg_per_ha	12.7291
2012-02-01	85	B	85	DM	15-30 cm	Ammonium_N_kg_per_ha	16.322
2012-02-01	85	C	85	Urea	15-30 cm	Ammonium_N_kg_per_ha	13.0794
2012-02-01	85	D	85	SU	15-30 cm	Ammonium_N_kg_per_ha	13.5466
2012-02-01	85	E	85	Control	15-30 cm	Ammonium_N_kg_per_ha	15.1815
2012-02-01	86	A	86	DM	15-30 cm	Ammonium_N_kg_per_ha	10.9408
2012-02-01	86	B	86	DM + A	15-30 cm	Ammonium_N_kg_per_ha	11.1038
2012-02-01	86	C	86	SU	15-30 cm	Ammonium_N_kg_per_ha	7.91773
2012-02-01	86	D	86	Urea	15-30 cm	Ammonium_N_kg_per_ha	7.01844
2012-02-01	86	E	86	Control	15-30 cm	Ammonium_N_kg_per_ha	7.13483
2012-02-01	88	A	88	SU	15-30 cm	Ammonium_N_kg_per_ha	7.42653
2012-02-01	88	B	88	Urea	15-30 cm	Ammonium_N_kg_per_ha	8.40585
2012-02-01	88	C	88	Control	15-30 cm	Ammonium_N_kg_per_ha	7.22833
2012-02-01	88	D	88	DM + A	15-30 cm	Ammonium_N_kg_per_ha	6.0275
2012-02-01	88	E	88	DM	15-30 cm	Ammonium_N_kg_per_ha	7.22872
2012-02-01	89	A	89	Control	15-30 cm	Ammonium_N_kg_per_ha	7.83318
2012-02-01	89	B	89	Urea	15-30 cm	Ammonium_N_kg_per_ha	7.66081
2012-02-01	89	C	89	SU	15-30 cm	Ammonium_N_kg_per_ha	11.6586
2012-02-01	89	D	89	DM	15-30 cm	Ammonium_N_kg_per_ha	7.47157
2012-02-01	89	E	89	DM + A	15-30 cm	Ammonium_N_kg_per_ha	7.87974
2012-02-01	85	A	85	DM + A	30-61 cm	Ammonium_N_kg_per_ha	16.7286
2012-02-01	85	B	85	DM	30-61 cm	Ammonium_N_kg_per_ha	15.0693
2012-02-01	85	C	85	Urea	30-61 cm	Ammonium_N_kg_per_ha	15.8295
2012-02-01	85	D	85	SU	30-61 cm	Ammonium_N_kg_per_ha	16.7716
2012-02-01	85	E	85	Control	30-61 cm	Ammonium_N_kg_per_ha	22.2385
2012-02-01	86	A	86	DM	30-61 cm	Ammonium_N_kg_per_ha	22.5686
2012-02-01	86	B	86	DM + A	30-61 cm	Ammonium_N_kg_per_ha	15.2834
2012-02-01	86	C	86	SU	30-61 cm	Ammonium_N_kg_per_ha	14.0549
2012-02-01	86	D	86	Urea	30-61 cm	Ammonium_N_kg_per_ha	9.39359
2012-02-01	86	E	86	Control	30-61 cm	Ammonium_N_kg_per_ha	9.19725
2012-02-01	88	A	88	SU	30-61 cm	Ammonium_N_kg_per_ha	16.0188
2012-02-01	88	B	88	Urea	30-61 cm	Ammonium_N_kg_per_ha	11.3149
2012-02-01	88	C	88	Control	30-61 cm	Ammonium_N_kg_per_ha	19.833
2012-02-01	88	D	88	DM + A	30-61 cm	Ammonium_N_kg_per_ha	8.68375
2012-02-01	88	E	88	DM	30-61 cm	Ammonium_N_kg_per_ha	11.1732
2012-02-01	89	A	89	Control	30-61 cm	Ammonium_N_kg_per_ha	10.1271
2012-02-01	89	B	89	Urea	30-61 cm	Ammonium_N_kg_per_ha	15.6378
2012-02-01	89	C	89	SU	30-61 cm	Ammonium_N_kg_per_ha	16.0157
2012-02-01	89	D	89	DM	30-61 cm	Ammonium_N_kg_per_ha	22.559
2012-02-01	89	E	89	DM + A	30-61 cm	Ammonium_N_kg_per_ha	15.8532
2012-02-01	85	A	85	DM + A	61-91 cm	Ammonium_N_kg_per_ha	15.2145
2012-02-01	85	B	85	DM	61-91 cm	Ammonium_N_kg_per_ha	16.3092
2012-02-01	85	C	85	Urea	61-91 cm	Ammonium_N_kg_per_ha	15.6596
2012-02-01	85	D	85	SU	61-91 cm	Ammonium_N_kg_per_ha	18.6702
2012-02-01	85	E	85	Control	61-91 cm	Ammonium_N_kg_per_ha	21.6997
2012-02-01	86	A	86	DM	61-91 cm	Ammonium_N_kg_per_ha	13.8905
2012-02-01	86	B	86	DM + A	61-91 cm	Ammonium_N_kg_per_ha	21.004
2012-02-01	86	C	86	SU	61-91 cm	Ammonium_N_kg_per_ha	11.3772
2012-02-01	86	D	86	Urea	61-91 cm	Ammonium_N_kg_per_ha	11.4669
2012-02-01	86	E	86	Control	61-91 cm	Ammonium_N_kg_per_ha	14.9875
2012-02-01	88	A	88	SU	61-91 cm	Ammonium_N_kg_per_ha	13.7324
2012-02-01	88	B	88	Urea	61-91 cm	Ammonium_N_kg_per_ha	12.5471
2012-02-01	88	C	88	Control	61-91 cm	Ammonium_N_kg_per_ha	16.6453
2012-02-01	88	D	88	DM + A	61-91 cm	Ammonium_N_kg_per_ha	9.89613
2012-02-01	88	E	88	DM	61-91 cm	Ammonium_N_kg_per_ha	13.6206
2012-02-01	89	A	89	Control	61-91 cm	Ammonium_N_kg_per_ha	9.61718
2012-02-01	89	B	89	Urea	61-91 cm	Ammonium_N_kg_per_ha	12.1647
2012-02-01	89	C	89	SU	61-91 cm	Ammonium_N_kg_per_ha	19.9385
2012-02-01	89	D	89	DM	61-91 cm	Ammonium_N_kg_per_ha	16.7628
2012-02-01	89	E	89	DM + A	61-91 cm	Ammonium_N_kg_per_ha	13.2173
2012-02-01	85	A	85	DM + A	91-120 cm	Ammonium_N_kg_per_ha	17.1701
2012-02-01	85	B	85	DM	91-120 cm	Ammonium_N_kg_per_ha	16.9149
2012-02-01	85	C	85	Urea	91-120 cm	Ammonium_N_kg_per_ha	19.7222
2012-02-01	85	D	85	SU	91-120 cm	Ammonium_N_kg_per_ha	18.2226
2012-02-01	85	E	85	Control	91-120 cm	Ammonium_N_kg_per_ha	20.8953
2012-02-01	86	A	86	DM	91-120 cm	Ammonium_N_kg_per_ha	16.59
2012-02-01	86	B	86	DM + A	91-120 cm	Ammonium_N_kg_per_ha	16.734
2012-02-01	86	C	86	SU	91-120 cm	Ammonium_N_kg_per_ha	16.7282
2012-02-01	86	D	86	Urea	91-120 cm	Ammonium_N_kg_per_ha	15.2288
2012-02-01	86	E	86	Control	91-120 cm	Ammonium_N_kg_per_ha	14.1206
2012-02-01	88	A	88	SU	91-120 cm	Ammonium_N_kg_per_ha	15.2002
2012-02-01	88	B	88	Urea	91-120 cm	Ammonium_N_kg_per_ha	13.9228
2012-02-01	88	C	88	Control	91-120 cm	Ammonium_N_kg_per_ha	16.3032
2012-02-01	88	D	88	DM + A	91-120 cm	Ammonium_N_kg_per_ha	12.307
2012-02-01	88	E	88	DM	91-120 cm	Ammonium_N_kg_per_ha	11.6263
2012-02-01	89	A	89	Control	91-120 cm	Ammonium_N_kg_per_ha	12.176
2012-02-01	89	B	89	Urea	91-120 cm	Ammonium_N_kg_per_ha	13.6559
2012-02-01	89	C	89	SU	91-120 cm	Ammonium_N_kg_per_ha	19.3137
2012-02-01	89	D	89	DM	91-120 cm	Ammonium_N_kg_per_ha	18.7612
2012-02-01	89	E	89	DM + A	91-120 cm	Ammonium_N_kg_per_ha	14.7394
2012-02-01	85	A	85	DM + A	120-150 cm	Ammonium_N_kg_per_ha	15.9655
2012-02-01	85	B	85	DM	120-150 cm	Ammonium_N_kg_per_ha	15.1212
2012-02-01	85	C	85	Urea	120-150 cm	Ammonium_N_kg_per_ha	20.2069
2012-02-01	85	D	85	SU	120-150 cm	Ammonium_N_kg_per_ha	18.4724
2012-02-01	85	E	85	Control	120-150 cm	Ammonium_N_kg_per_ha	21.4136
2012-02-01	86	A	86	DM	120-150 cm	Ammonium_N_kg_per_ha	15.496
2012-02-01	86	B	86	DM + A	120-150 cm	Ammonium_N_kg_per_ha	22.5493
2012-02-01	86	C	86	SU	120-150 cm	Ammonium_N_kg_per_ha	13.3006
2012-02-01	86	D	86	Urea	120-150 cm	Ammonium_N_kg_per_ha	17.0315
2012-02-01	86	E	86	Control	120-150 cm	Ammonium_N_kg_per_ha	15.2816
2012-02-01	88	A	88	SU	120-150 cm	Ammonium_N_kg_per_ha	15.5669
2012-02-01	88	B	88	Urea	120-150 cm	Ammonium_N_kg_per_ha	13.4882
2012-02-01	88	C	88	Control	120-150 cm	Ammonium_N_kg_per_ha	17.3202
2012-02-01	88	D	88	DM + A	120-150 cm	Ammonium_N_kg_per_ha	12.0708
2012-02-01	88	E	88	DM	120-150 cm	Ammonium_N_kg_per_ha	13.7015
2012-02-01	89	A	89	Control	120-150 cm	Ammonium_N_kg_per_ha	13.6308
2012-02-01	89	B	89	Urea	120-150 cm	Ammonium_N_kg_per_ha	13.1356
2012-02-01	89	C	89	SU	120-150 cm	Ammonium_N_kg_per_ha	15.1433
2012-02-01	89	D	89	DM	120-150 cm	Ammonium_N_kg_per_ha	19.3614
2012-02-01	89	E	89	DM + A	120-150 cm	Ammonium_N_kg_per_ha	16.3027
2012-02-01	85	A	85	DM + A	150-180 cm	Ammonium_N_kg_per_ha	18.7757
2012-02-01	85	B	85	DM	150-180 cm	Ammonium_N_kg_per_ha	22.2499
2012-02-01	85	C	85	Urea	150-180 cm	Ammonium_N_kg_per_ha	23.1058
2012-02-01	85	D	85	SU	150-180 cm	Ammonium_N_kg_per_ha	23.7652
2012-02-01	85	E	85	Control	150-180 cm	Ammonium_N_kg_per_ha	32.1333
2012-02-01	86	A	86	DM	150-180 cm	Ammonium_N_kg_per_ha	19.8817
2012-02-01	86	B	86	DM + A	150-180 cm	Ammonium_N_kg_per_ha	23.8385
2012-02-01	86	C	86	SU	150-180 cm	Ammonium_N_kg_per_ha	21.1762
2012-02-01	86	D	86	Urea	150-180 cm	Ammonium_N_kg_per_ha	17.8789
2012-02-01	86	E	86	Control	150-180 cm	Ammonium_N_kg_per_ha	28.4345
2012-02-01	88	A	88	SU	150-180 cm	Ammonium_N_kg_per_ha	16.2397
2012-02-01	88	B	88	Urea	150-180 cm	Ammonium_N_kg_per_ha	13.5611
2012-02-01	88	C	88	Control	150-180 cm	Ammonium_N_kg_per_ha	22.2021
2012-02-01	88	D	88	DM + A	150-180 cm	Ammonium_N_kg_per_ha	14.3622
2012-02-01	88	E	88	DM	150-180 cm	Ammonium_N_kg_per_ha	15.9249
2012-02-01	89	A	89	Control	150-180 cm	Ammonium_N_kg_per_ha	15.9959
2012-02-01	89	B	89	Urea	150-180 cm	Ammonium_N_kg_per_ha	15.9206
2012-02-01	89	C	89	SU	150-180 cm	Ammonium_N_kg_per_ha	18.9464
2012-02-01	89	D	89	DM	150-180 cm	Ammonium_N_kg_per_ha	23.8079
2012-02-01	89	E	89	DM + A	150-180 cm	Ammonium_N_kg_per_ha	25.847
2012-11-16	85	A	85	DM + A	0-7.6 cm	Ammonium_N_kg_per_ha	12.4572
2012-11-16	85	B	85	DM	0-7.6 cm	Ammonium_N_kg_per_ha	9.63025
2012-11-16	85	C	85	Urea	0-7.6 cm	Ammonium_N_kg_per_ha	6.30064
2012-11-16	85	D	85	SU	0-7.6 cm	Ammonium_N_kg_per_ha	6.46232
2012-11-16	85	E	85	Control	0-7.6 cm	Ammonium_N_kg_per_ha	6.1468
2012-11-16	86	A	86	DM	0-7.6 cm	Ammonium_N_kg_per_ha	8.70821
2012-11-16	86	B	86	DM + A	0-7.6 cm	Ammonium_N_kg_per_ha	10.706
2012-11-16	86	C	86	SU	0-7.6 cm	Ammonium_N_kg_per_ha	8.65698
2012-11-16	86	D	86	Urea	0-7.6 cm	Ammonium_N_kg_per_ha	7.61975
2012-11-16	86	E	86	Control	0-7.6 cm	Ammonium_N_kg_per_ha	7.61975
2012-11-16	88	A	88	SU	0-7.6 cm	Ammonium_N_kg_per_ha	5.30962
2012-11-16	88	B	88	Urea	0-7.6 cm	Ammonium_N_kg_per_ha	7.05721
2012-11-16	88	C	88	Control	0-7.6 cm	Ammonium_N_kg_per_ha	9.07249
2012-11-16	88	D	88	DM + A	0-7.6 cm	Ammonium_N_kg_per_ha	10.1767
2012-11-16	88	E	88	DM	0-7.6 cm	Ammonium_N_kg_per_ha	7.88708
2012-11-16	89	A	89	Control	0-7.6 cm	Ammonium_N_kg_per_ha	4.89914
2012-11-16	89	B	89	Urea	0-7.6 cm	Ammonium_N_kg_per_ha	6.84124
2012-11-16	89	C	89	SU	0-7.6 cm	Ammonium_N_kg_per_ha	5.81047
2012-11-16	89	D	89	DM	0-7.6 cm	Ammonium_N_kg_per_ha	4.699
2012-11-16	89	E	89	DM + A	0-7.6 cm	Ammonium_N_kg_per_ha	6.02437
2012-11-16	85	A	85	DM + A	7.6-15 cm	Ammonium_N_kg_per_ha	7.65658
2012-11-16	85	B	85	DM	7.6-15 cm	Ammonium_N_kg_per_ha	5.78259
2012-11-16	85	C	85	Urea	7.6-15 cm	Ammonium_N_kg_per_ha	7.7617
2012-11-16	85	D	85	SU	7.6-15 cm	Ammonium_N_kg_per_ha	6.79148
2012-11-16	85	E	85	Control	7.6-15 cm	Ammonium_N_kg_per_ha	6.53219
2012-11-16	86	A	86	DM	7.6-15 cm	Ammonium_N_kg_per_ha	14.5636
2012-11-16	86	B	86	DM + A	7.6-15 cm	Ammonium_N_kg_per_ha	15.2
2012-11-16	86	C	86	SU	7.6-15 cm	Ammonium_N_kg_per_ha	9.4549
2012-11-16	86	D	86	Urea	7.6-15 cm	Ammonium_N_kg_per_ha	8.13846
2012-11-16	86	E	86	Control	7.6-15 cm	Ammonium_N_kg_per_ha	11.6964
2012-11-16	88	A	88	SU	7.6-15 cm	Ammonium_N_kg_per_ha	11.3002
2012-11-16	88	B	88	Urea	7.6-15 cm	Ammonium_N_kg_per_ha	6.98373
2012-11-16	88	C	88	Control	7.6-15 cm	Ammonium_N_kg_per_ha	10.0291
2012-11-16	88	D	88	DM + A	7.6-15 cm	Ammonium_N_kg_per_ha	5.36493
2012-11-16	88	E	88	DM	7.6-15 cm	Ammonium_N_kg_per_ha	8.74195
2012-11-16	89	A	89	Control	7.6-15 cm	Ammonium_N_kg_per_ha	6.37156
2012-11-16	89	B	89	Urea	7.6-15 cm	Ammonium_N_kg_per_ha	5.49787
2012-11-16	89	C	89	SU	7.6-15 cm	Ammonium_N_kg_per_ha	5.60567
2012-11-16	89	D	89	DM	7.6-15 cm	Ammonium_N_kg_per_ha	5.72905
2012-11-16	89	E	89	DM + A	7.6-15 cm	Ammonium_N_kg_per_ha	5.29
2012-11-16	85	A	85	DM + A	15-30 cm	Ammonium_N_kg_per_ha	11.969
2012-11-16	85	B	85	DM	15-30 cm	Ammonium_N_kg_per_ha	15.8532
2012-11-16	85	C	85	Urea	15-30 cm	Ammonium_N_kg_per_ha	13.5375
2012-11-16	85	D	85	SU	15-30 cm	Ammonium_N_kg_per_ha	14.597
2012-11-16	85	E	85	Control	15-30 cm	Ammonium_N_kg_per_ha	16.2624
2012-11-16	86	A	86	DM	15-30 cm	Ammonium_N_kg_per_ha	19.8095
2012-11-16	86	B	86	DM + A	15-30 cm	Ammonium_N_kg_per_ha	15.7742
2012-11-16	86	C	86	SU	15-30 cm	Ammonium_N_kg_per_ha	14.975
2012-11-16	86	D	86	Urea	15-30 cm	Ammonium_N_kg_per_ha	10.3509
2012-11-16	86	E	86	Control	15-30 cm	Ammonium_N_kg_per_ha	16.8336
2012-11-16	88	A	88	SU	15-30 cm	Ammonium_N_kg_per_ha	14.8819
2012-11-16	88	B	88	Urea	15-30 cm	Ammonium_N_kg_per_ha	9.71741
2012-11-16	88	C	88	Control	15-30 cm	Ammonium_N_kg_per_ha	22.6394
2012-11-16	88	D	88	DM + A	15-30 cm	Ammonium_N_kg_per_ha	10.4533
2012-11-16	88	E	88	DM	15-30 cm	Ammonium_N_kg_per_ha	14.3615
2012-11-16	89	A	89	Control	15-30 cm	Ammonium_N_kg_per_ha	12.6378
2012-11-16	89	B	89	Urea	15-30 cm	Ammonium_N_kg_per_ha	11.811
2012-11-16	89	C	89	SU	15-30 cm	Ammonium_N_kg_per_ha	12.7135
2012-11-16	89	D	89	DM	15-30 cm	Ammonium_N_kg_per_ha	9.90473
2012-11-16	89	E	89	DM + A	15-30 cm	Ammonium_N_kg_per_ha	11.4966
2012-11-16	85	A	85	DM + A	30-61 cm	Ammonium_N_kg_per_ha	33.3246
2012-11-16	85	B	85	DM	30-61 cm	Ammonium_N_kg_per_ha	36.0685
2012-11-16	85	C	85	Urea	30-61 cm	Ammonium_N_kg_per_ha	39.877
2012-11-16	85	D	85	SU	30-61 cm	Ammonium_N_kg_per_ha	57.3512
2012-11-16	85	E	85	Control	30-61 cm	Ammonium_N_kg_per_ha	54.3961
2012-11-16	86	A	86	DM	30-61 cm	Ammonium_N_kg_per_ha	52.4717
2012-11-16	86	B	86	DM + A	30-61 cm	Ammonium_N_kg_per_ha	50.1823
2012-11-16	86	C	86	SU	30-61 cm	Ammonium_N_kg_per_ha	49.8751
2012-11-16	86	D	86	Urea	30-61 cm	Ammonium_N_kg_per_ha	36.0685
2012-11-16	86	E	86	Control	30-61 cm	Ammonium_N_kg_per_ha	20.2411
2012-11-16	88	A	88	SU	30-61 cm	Ammonium_N_kg_per_ha	32.3761
2012-11-16	88	B	88	Urea	30-61 cm	Ammonium_N_kg_per_ha	19.314
2012-11-16	88	C	88	Control	30-61 cm	Ammonium_N_kg_per_ha	56.6439
2012-11-16	88	D	88	DM + A	30-61 cm	Ammonium_N_kg_per_ha	57.7992
2012-11-16	88	E	88	DM	30-61 cm	Ammonium_N_kg_per_ha	64.6449
2012-11-16	89	B	89	Urea	30-61 cm	Ammonium_N_kg_per_ha	17.3398
2012-11-16	89	C	89	SU	30-61 cm	Ammonium_N_kg_per_ha	40.9095
2012-11-16	89	D	89	DM	30-61 cm	Ammonium_N_kg_per_ha	29.2988
2012-11-16	89	E	89	DM + A	30-61 cm	Ammonium_N_kg_per_ha	28.9479
2012-11-16	85	A	85	DM + A	61-91 cm	Ammonium_N_kg_per_ha	39.6801
2012-11-16	85	B	85	DM	61-91 cm	Ammonium_N_kg_per_ha	46.1004
2012-11-16	85	C	85	Urea	61-91 cm	Ammonium_N_kg_per_ha	28.6706
2012-11-16	85	D	85	SU	61-91 cm	Ammonium_N_kg_per_ha	61.825
2012-11-16	85	E	85	Control	61-91 cm	Ammonium_N_kg_per_ha	33.4872
2012-11-16	86	A	86	DM	61-91 cm	Ammonium_N_kg_per_ha	40.3278
2012-11-16	86	B	86	DM + A	61-91 cm	Ammonium_N_kg_per_ha	38.5691
2012-11-16	86	C	86	SU	61-91 cm	Ammonium_N_kg_per_ha	31.7754
2012-11-16	86	D	86	Urea	61-91 cm	Ammonium_N_kg_per_ha	38.4048
2012-11-16	86	E	86	Control	61-91 cm	Ammonium_N_kg_per_ha	39.6801
2012-11-16	88	A	88	SU	61-91 cm	Ammonium_N_kg_per_ha	31.3182
2012-11-16	88	B	88	Urea	61-91 cm	Ammonium_N_kg_per_ha	27.3864
2012-11-16	88	C	88	Control	61-91 cm	Ammonium_N_kg_per_ha	32.4072
2012-11-16	88	D	88	DM + A	61-91 cm	Ammonium_N_kg_per_ha	34.0614
2012-11-16	88	E	88	DM	61-91 cm	Ammonium_N_kg_per_ha	18.3643
2012-11-16	89	A	89	Control	61-91 cm	Ammonium_N_kg_per_ha	44.3484
2012-11-16	89	C	89	SU	61-91 cm	Ammonium_N_kg_per_ha	36.866
2012-11-16	89	D	89	DM	61-91 cm	Ammonium_N_kg_per_ha	41.148
2012-11-16	89	E	89	DM + A	61-91 cm	Ammonium_N_kg_per_ha	33.0285
2012-11-16	85	A	85	DM + A	91-120 cm	Ammonium_N_kg_per_ha	21.5792
2012-11-16	85	B	85	DM	91-120 cm	Ammonium_N_kg_per_ha	21.2361
2012-11-16	85	C	85	Urea	91-120 cm	Ammonium_N_kg_per_ha	44.0314
2012-11-16	85	D	85	SU	91-120 cm	Ammonium_N_kg_per_ha	26.4566
2012-11-16	85	E	85	Control	91-120 cm	Ammonium_N_kg_per_ha	50.9577
2012-11-16	86	A	86	DM	91-120 cm	Ammonium_N_kg_per_ha	32.2611
2012-11-16	86	B	86	DM + A	91-120 cm	Ammonium_N_kg_per_ha	42.0227
2012-11-16	86	C	86	SU	91-120 cm	Ammonium_N_kg_per_ha	44.8269
2012-11-16	86	D	86	Urea	91-120 cm	Ammonium_N_kg_per_ha	33.371
2012-11-16	86	E	86	Control	91-120 cm	Ammonium_N_kg_per_ha	19.1184
2012-11-16	88	A	88	SU	91-120 cm	Ammonium_N_kg_per_ha	30.3373
2012-11-16	88	B	88	Urea	91-120 cm	Ammonium_N_kg_per_ha	21.5433
2012-11-16	88	C	88	Control	91-120 cm	Ammonium_N_kg_per_ha	19.34
2012-11-16	88	D	88	DM + A	91-120 cm	Ammonium_N_kg_per_ha	41.0763
2012-11-16	88	E	88	DM	91-120 cm	Ammonium_N_kg_per_ha	16.6665
2012-11-16	89	A	89	Control	91-120 cm	Ammonium_N_kg_per_ha	33.9591
2012-11-16	89	B	89	Urea	91-120 cm	Ammonium_N_kg_per_ha	47.3229
2012-11-16	89	C	89	SU	91-120 cm	Ammonium_N_kg_per_ha	31.2331
2012-11-16	89	D	89	DM	91-120 cm	Ammonium_N_kg_per_ha	39.685
2012-11-16	89	E	89	DM + A	91-120 cm	Ammonium_N_kg_per_ha	22.753
2012-11-16	85	A	85	DM + A	120-150 cm	Ammonium_N_kg_per_ha	43.2283
2012-11-16	85	B	85	DM	120-150 cm	Ammonium_N_kg_per_ha	42.8272
2012-11-16	85	C	85	Urea	120-150 cm	Ammonium_N_kg_per_ha	44.3209
2012-11-16	85	D	85	SU	120-150 cm	Ammonium_N_kg_per_ha	43.4645
2012-11-16	85	E	85	Control	120-150 cm	Ammonium_N_kg_per_ha	43.9369
2012-11-16	86	A	86	DM	120-150 cm	Ammonium_N_kg_per_ha	38.5681
2012-11-16	86	B	86	DM + A	120-150 cm	Ammonium_N_kg_per_ha	30.2362
2012-11-16	86	C	86	SU	120-150 cm	Ammonium_N_kg_per_ha	35.6099
2012-11-16	86	D	86	Urea	120-150 cm	Ammonium_N_kg_per_ha	40.0906
2012-11-16	86	E	86	Control	120-150 cm	Ammonium_N_kg_per_ha	32.6528
2012-11-16	88	A	88	SU	120-150 cm	Ammonium_N_kg_per_ha	24.0144
2012-11-16	88	B	88	Urea	120-150 cm	Ammonium_N_kg_per_ha	40.2594
2012-11-16	88	C	88	Control	120-150 cm	Ammonium_N_kg_per_ha	30.1003
2012-11-16	88	D	88	DM + A	120-150 cm	Ammonium_N_kg_per_ha	36.3779
2012-11-16	88	E	88	DM	120-150 cm	Ammonium_N_kg_per_ha	22.8096
2012-11-16	89	A	89	Control	120-150 cm	Ammonium_N_kg_per_ha	44.3951
2012-11-16	89	B	89	Urea	120-150 cm	Ammonium_N_kg_per_ha	46.613
2012-11-16	89	C	89	SU	120-150 cm	Ammonium_N_kg_per_ha	54.9863
2012-11-16	89	D	89	DM	120-150 cm	Ammonium_N_kg_per_ha	37.6846
2012-11-16	89	E	89	DM + A	120-150 cm	Ammonium_N_kg_per_ha	25.5118
2012-11-16	85	A	85	DM + A	150-180 cm	Ammonium_N_kg_per_ha	37.5514
2012-11-16	85	B	85	DM	150-180 cm	Ammonium_N_kg_per_ha	63.3984
2012-11-16	85	C	85	Urea	150-180 cm	Ammonium_N_kg_per_ha	55.2596
2012-11-16	85	D	85	SU	150-180 cm	Ammonium_N_kg_per_ha	50.5502
2012-11-16	85	E	85	Control	150-180 cm	Ammonium_N_kg_per_ha	53.8886
2012-11-16	86	A	86	DM	150-180 cm	Ammonium_N_kg_per_ha	43.0879
2012-11-16	86	B	86	DM + A	150-180 cm	Ammonium_N_kg_per_ha	36.8198
2012-11-16	86	C	86	SU	150-180 cm	Ammonium_N_kg_per_ha	39.6798
2012-11-16	86	D	86	Urea	150-180 cm	Ammonium_N_kg_per_ha	68.405
2012-11-16	86	E	86	Control	150-180 cm	Ammonium_N_kg_per_ha	28.7731
2012-11-16	88	A	88	SU	150-180 cm	Ammonium_N_kg_per_ha	50.5591
2012-11-16	88	B	88	Urea	150-180 cm	Ammonium_N_kg_per_ha	28.9206
2012-11-16	88	C	88	Control	150-180 cm	Ammonium_N_kg_per_ha	52.7375
2012-11-16	88	D	88	DM + A	150-180 cm	Ammonium_N_kg_per_ha	25.847
2012-11-16	89	A	89	Control	150-180 cm	Ammonium_N_kg_per_ha	41.1404
2012-11-16	89	B	89	Urea	150-180 cm	Ammonium_N_kg_per_ha	46.6617
2012-11-16	89	C	89	SU	150-180 cm	Ammonium_N_kg_per_ha	25.2332
2012-11-16	89	D	89	DM	150-180 cm	Ammonium_N_kg_per_ha	36.6983
2012-11-16	89	E	89	DM + A	150-180 cm	Ammonium_N_kg_per_ha	34.4964
2013-11-08	85	A	85	DM + A	0-7.6 cm	Ammonium_N_kg_per_ha	4.63316
2013-11-08	85	B	85	DM	0-7.6 cm	Ammonium_N_kg_per_ha	4.64024
2013-11-08	85	C	85	Urea	0-7.6 cm	Ammonium_N_kg_per_ha	6.97192
2013-11-08	85	D	85	SU	0-7.6 cm	Ammonium_N_kg_per_ha	3.83591
2013-11-08	85	E	85	Control	0-7.6 cm	Ammonium_N_kg_per_ha	4.16729
2013-11-08	86	A	86	DM	0-7.6 cm	Ammonium_N_kg_per_ha	3.65301
2013-11-08	86	B	86	DM + A	0-7.6 cm	Ammonium_N_kg_per_ha	5.53212
2013-11-08	86	C	86	SU	0-7.6 cm	Ammonium_N_kg_per_ha	4.89204
2013-11-08	86	D	86	Urea	0-7.6 cm	Ammonium_N_kg_per_ha	7.21411
2013-11-08	86	E	86	Control	0-7.6 cm	Ammonium_N_kg_per_ha	3.67735
2013-11-08	88	A	88	SU	0-7.6 cm	Ammonium_N_kg_per_ha	4.67904
2013-11-08	88	B	88	Urea	0-7.6 cm	Ammonium_N_kg_per_ha	6.90372
2013-11-08	88	C	88	Control	0-7.6 cm	Ammonium_N_kg_per_ha	4.61004
2013-11-08	88	D	88	DM + A	0-7.6 cm	Ammonium_N_kg_per_ha	3.43469
2013-11-08	88	E	88	DM	0-7.6 cm	Ammonium_N_kg_per_ha	5.88157
2013-11-08	89	A	89	Control	0-7.6 cm	Ammonium_N_kg_per_ha	4.36063
2013-11-08	89	B	89	Urea	0-7.6 cm	Ammonium_N_kg_per_ha	3.10774
2013-11-08	89	C	89	SU	0-7.6 cm	Ammonium_N_kg_per_ha	5.32263
2013-11-08	89	D	89	DM	0-7.6 cm	Ammonium_N_kg_per_ha	4.96692
2013-11-08	89	E	89	DM + A	0-7.6 cm	Ammonium_N_kg_per_ha	4.18098
2013-11-08	85	A	85	DM + A	7.6-15 cm	Ammonium_N_kg_per_ha	6.4516
2013-11-08	85	B	85	DM	7.6-15 cm	Ammonium_N_kg_per_ha	4.53625
2013-11-08	85	C	85	Urea	7.6-15 cm	Ammonium_N_kg_per_ha	8.00214
2013-11-08	85	D	85	SU	7.6-15 cm	Ammonium_N_kg_per_ha	4.96439
2013-11-08	85	E	85	Control	7.6-15 cm	Ammonium_N_kg_per_ha	4.64838
2013-11-08	86	A	86	DM	7.6-15 cm	Ammonium_N_kg_per_ha	4.77355
2013-11-08	86	B	86	DM + A	7.6-15 cm	Ammonium_N_kg_per_ha	6.77888
2013-11-08	86	C	86	SU	7.6-15 cm	Ammonium_N_kg_per_ha	3.9648
2013-11-08	86	D	86	Urea	7.6-15 cm	Ammonium_N_kg_per_ha	5.79809
2013-11-08	86	E	86	Control	7.6-15 cm	Ammonium_N_kg_per_ha	5.43892
2013-11-08	88	A	88	SU	7.6-15 cm	Ammonium_N_kg_per_ha	4.49547
2013-11-08	88	B	88	Urea	7.6-15 cm	Ammonium_N_kg_per_ha	5.24109
2013-11-08	88	C	88	Control	7.6-15 cm	Ammonium_N_kg_per_ha	6.18785
2013-11-08	88	D	88	DM + A	7.6-15 cm	Ammonium_N_kg_per_ha	4.14558
2013-11-08	88	E	88	DM	7.6-15 cm	Ammonium_N_kg_per_ha	4.77927
2013-11-08	89	A	89	Control	7.6-15 cm	Ammonium_N_kg_per_ha	6.53491
2013-11-08	89	B	89	Urea	7.6-15 cm	Ammonium_N_kg_per_ha	4.65633
2013-11-08	89	C	89	SU	7.6-15 cm	Ammonium_N_kg_per_ha	5.57418
2013-11-08	89	D	89	DM	7.6-15 cm	Ammonium_N_kg_per_ha	4.72804
2013-11-08	89	E	89	DM + A	7.6-15 cm	Ammonium_N_kg_per_ha	3.35935
2013-11-08	85	A	85	DM + A	15-30 cm	Ammonium_N_kg_per_ha	14.9706
2013-11-08	85	B	85	DM	15-30 cm	Ammonium_N_kg_per_ha	10.0919
2013-11-08	85	C	85	Urea	15-30 cm	Ammonium_N_kg_per_ha	11.6098
2013-11-08	85	D	85	SU	15-30 cm	Ammonium_N_kg_per_ha	14.5754
2013-11-08	85	E	85	Control	15-30 cm	Ammonium_N_kg_per_ha	11.9695
2013-11-08	86	A	86	DM	15-30 cm	Ammonium_N_kg_per_ha	11.9895
2013-11-08	86	B	86	DM + A	15-30 cm	Ammonium_N_kg_per_ha	9.81987
2013-11-08	86	C	86	SU	15-30 cm	Ammonium_N_kg_per_ha	9.5093
2013-11-08	86	D	86	Urea	15-30 cm	Ammonium_N_kg_per_ha	11.6057
2013-11-08	86	E	86	Control	15-30 cm	Ammonium_N_kg_per_ha	11.4046
2013-11-08	88	A	88	SU	15-30 cm	Ammonium_N_kg_per_ha	10.9263
2013-11-08	88	B	88	Urea	15-30 cm	Ammonium_N_kg_per_ha	11.8719
2013-11-08	88	C	88	Control	15-30 cm	Ammonium_N_kg_per_ha	11.4502
2013-11-08	88	D	88	DM + A	15-30 cm	Ammonium_N_kg_per_ha	8.58473
2013-11-08	88	E	88	DM	15-30 cm	Ammonium_N_kg_per_ha	17.5727
2013-11-08	89	A	89	Control	15-30 cm	Ammonium_N_kg_per_ha	12.0667
2013-11-08	89	B	89	Urea	15-30 cm	Ammonium_N_kg_per_ha	12.5562
2013-11-08	89	C	89	SU	15-30 cm	Ammonium_N_kg_per_ha	10.573
2013-11-08	89	D	89	DM	15-30 cm	Ammonium_N_kg_per_ha	11.381
2013-11-08	89	E	89	DM + A	15-30 cm	Ammonium_N_kg_per_ha	9.10134
2013-11-08	85	A	85	DM + A	30-61 cm	Ammonium_N_kg_per_ha	23.9311
2013-11-08	85	B	85	DM	30-61 cm	Ammonium_N_kg_per_ha	17.7885
2013-11-08	85	C	85	Urea	30-61 cm	Ammonium_N_kg_per_ha	12.2075
2013-11-08	85	D	85	SU	30-61 cm	Ammonium_N_kg_per_ha	11.4991
2013-11-08	85	E	85	Control	30-61 cm	Ammonium_N_kg_per_ha	21.8009
2013-11-08	86	A	86	DM	30-61 cm	Ammonium_N_kg_per_ha	18.9844
2013-11-08	86	B	86	DM + A	30-61 cm	Ammonium_N_kg_per_ha	15.9829
2013-11-08	86	C	86	SU	30-61 cm	Ammonium_N_kg_per_ha	14.9849
2013-11-08	86	D	86	Urea	30-61 cm	Ammonium_N_kg_per_ha	15.955
2013-11-08	86	E	86	Control	30-61 cm	Ammonium_N_kg_per_ha	15.2818
2013-11-08	88	A	88	SU	30-61 cm	Ammonium_N_kg_per_ha	16.2467
2013-11-08	88	B	88	Urea	30-61 cm	Ammonium_N_kg_per_ha	17.1866
2013-11-08	88	C	88	Control	30-61 cm	Ammonium_N_kg_per_ha	15.9956
2013-11-08	88	D	88	DM + A	30-61 cm	Ammonium_N_kg_per_ha	17.4831
2013-11-08	88	E	88	DM	30-61 cm	Ammonium_N_kg_per_ha	18.4432
2013-11-08	89	A	89	Control	30-61 cm	Ammonium_N_kg_per_ha	14.8237
2013-11-08	89	B	89	Urea	30-61 cm	Ammonium_N_kg_per_ha	17.365
2013-11-08	89	C	89	SU	30-61 cm	Ammonium_N_kg_per_ha	17.743
2013-11-08	89	D	89	DM	30-61 cm	Ammonium_N_kg_per_ha	12.7272
2013-11-08	89	E	89	DM + A	30-61 cm	Ammonium_N_kg_per_ha	12.8835
2013-11-08	85	A	85	DM + A	61-91 cm	Ammonium_N_kg_per_ha	15.131
2013-11-08	85	B	85	DM	61-91 cm	Ammonium_N_kg_per_ha	16.6829
2013-11-08	85	C	85	Urea	61-91 cm	Ammonium_N_kg_per_ha	16.9286
2013-11-08	85	D	85	SU	61-91 cm	Ammonium_N_kg_per_ha	15.6134
2013-11-08	85	E	85	Control	61-91 cm	Ammonium_N_kg_per_ha	16.7207
2013-11-08	86	A	86	DM	61-91 cm	Ammonium_N_kg_per_ha	19.7968
2013-11-08	86	B	86	DM + A	61-91 cm	Ammonium_N_kg_per_ha	17.2593
2013-11-08	86	C	86	SU	61-91 cm	Ammonium_N_kg_per_ha	15.2476
2013-11-08	86	D	86	Urea	61-91 cm	Ammonium_N_kg_per_ha	20.3225
2013-11-08	86	E	86	Control	61-91 cm	Ammonium_N_kg_per_ha	15.3619
2013-11-08	88	A	88	SU	61-91 cm	Ammonium_N_kg_per_ha	19.1158
2013-11-08	88	B	88	Urea	61-91 cm	Ammonium_N_kg_per_ha	20.7233
2013-11-08	88	C	88	Control	61-91 cm	Ammonium_N_kg_per_ha	23.0502
2013-11-08	88	D	88	DM + A	61-91 cm	Ammonium_N_kg_per_ha	18.0594
2013-11-08	88	E	88	DM	61-91 cm	Ammonium_N_kg_per_ha	16.8935
2013-11-08	89	A	89	Control	61-91 cm	Ammonium_N_kg_per_ha	18.5837
2013-11-08	89	B	89	Urea	61-91 cm	Ammonium_N_kg_per_ha	19.0652
2013-11-08	89	C	89	SU	61-91 cm	Ammonium_N_kg_per_ha	11.701
2013-11-08	89	D	89	DM	61-91 cm	Ammonium_N_kg_per_ha	14.9919
2013-11-08	89	E	89	DM + A	61-91 cm	Ammonium_N_kg_per_ha	11.3009
2013-11-08	85	A	85	DM + A	91-120 cm	Ammonium_N_kg_per_ha	18.4134
2013-11-08	85	B	85	DM	91-120 cm	Ammonium_N_kg_per_ha	19.5296
2013-11-08	85	C	85	Urea	91-120 cm	Ammonium_N_kg_per_ha	14.1448
2013-11-08	85	D	85	SU	91-120 cm	Ammonium_N_kg_per_ha	15.1244
2013-11-08	85	E	85	Control	91-120 cm	Ammonium_N_kg_per_ha	13.6897
2013-11-08	86	A	86	DM	91-120 cm	Ammonium_N_kg_per_ha	14.7665
2013-11-08	86	B	86	DM + A	91-120 cm	Ammonium_N_kg_per_ha	13.2785
2013-11-08	86	C	86	SU	91-120 cm	Ammonium_N_kg_per_ha	13.2693
2013-11-08	86	D	86	Urea	91-120 cm	Ammonium_N_kg_per_ha	14.2768
2013-11-08	86	E	86	Control	91-120 cm	Ammonium_N_kg_per_ha	12.77
2013-11-08	88	A	88	SU	91-120 cm	Ammonium_N_kg_per_ha	13.3898
2013-11-08	88	B	88	Urea	91-120 cm	Ammonium_N_kg_per_ha	15.7112
2013-11-08	88	C	88	Control	91-120 cm	Ammonium_N_kg_per_ha	14.0031
2013-11-08	88	D	88	DM + A	91-120 cm	Ammonium_N_kg_per_ha	16.1414
2013-11-08	88	E	88	DM	91-120 cm	Ammonium_N_kg_per_ha	13.0043
2013-11-08	89	A	89	Control	91-120 cm	Ammonium_N_kg_per_ha	16.66
2013-11-08	89	B	89	Urea	91-120 cm	Ammonium_N_kg_per_ha	23.7319
2013-11-08	89	C	89	SU	91-120 cm	Ammonium_N_kg_per_ha	12.706
2013-11-08	89	D	89	DM	91-120 cm	Ammonium_N_kg_per_ha	12.8453
2013-11-08	89	E	89	DM + A	91-120 cm	Ammonium_N_kg_per_ha	13.2597
2013-11-08	85	A	85	DM + A	120-150 cm	Ammonium_N_kg_per_ha	18.536
2013-11-08	85	B	85	DM	120-150 cm	Ammonium_N_kg_per_ha	21.9839
2013-11-08	85	C	85	Urea	120-150 cm	Ammonium_N_kg_per_ha	21.9448
2013-11-08	85	D	85	SU	120-150 cm	Ammonium_N_kg_per_ha	19.497
2013-11-08	85	E	85	Control	120-150 cm	Ammonium_N_kg_per_ha	19.9745
2013-11-08	86	A	86	DM	120-150 cm	Ammonium_N_kg_per_ha	16.6924
2013-11-08	86	B	86	DM + A	120-150 cm	Ammonium_N_kg_per_ha	14.6693
2013-11-08	86	C	86	SU	120-150 cm	Ammonium_N_kg_per_ha	17.7934
2013-11-08	86	D	86	Urea	120-150 cm	Ammonium_N_kg_per_ha	15.9891
2013-11-08	86	E	86	Control	120-150 cm	Ammonium_N_kg_per_ha	19.7151
2013-11-08	88	A	88	SU	120-150 cm	Ammonium_N_kg_per_ha	24.0144
2013-11-08	88	B	88	Urea	120-150 cm	Ammonium_N_kg_per_ha	18.685
2013-11-08	88	C	88	Control	120-150 cm	Ammonium_N_kg_per_ha	18.2227
2013-11-08	88	D	88	DM + A	120-150 cm	Ammonium_N_kg_per_ha	19.4199
2013-11-08	88	E	88	DM	120-150 cm	Ammonium_N_kg_per_ha	14.8795
2013-11-08	89	A	89	Control	120-150 cm	Ammonium_N_kg_per_ha	17.8706
2013-11-08	89	B	89	Urea	120-150 cm	Ammonium_N_kg_per_ha	15.5882
2013-11-08	89	C	89	SU	120-150 cm	Ammonium_N_kg_per_ha	13.395
2013-11-08	89	D	89	DM	120-150 cm	Ammonium_N_kg_per_ha	16.9232
2013-11-08	89	E	89	DM + A	120-150 cm	Ammonium_N_kg_per_ha	13.7266
2013-11-08	85	A	85	DM + A	150-180 cm	Ammonium_N_kg_per_ha	18.6227
2013-11-08	85	B	85	DM	150-180 cm	Ammonium_N_kg_per_ha	25.5181
2013-11-08	85	C	85	Urea	150-180 cm	Ammonium_N_kg_per_ha	20.2481
2013-11-08	85	D	85	SU	150-180 cm	Ammonium_N_kg_per_ha	19.3452
2013-11-08	85	E	85	Control	150-180 cm	Ammonium_N_kg_per_ha	18.0272
2013-11-08	86	A	86	DM	150-180 cm	Ammonium_N_kg_per_ha	20.4241
2013-11-08	86	B	86	DM + A	150-180 cm	Ammonium_N_kg_per_ha	22.604
2013-11-08	86	C	86	SU	150-180 cm	Ammonium_N_kg_per_ha	19.4012
2013-11-08	86	D	86	Urea	150-180 cm	Ammonium_N_kg_per_ha	17.9599
2013-11-08	86	E	86	Control	150-180 cm	Ammonium_N_kg_per_ha	20.984
2013-11-08	88	A	88	SU	150-180 cm	Ammonium_N_kg_per_ha	21.4318
2013-11-08	88	B	88	Urea	150-180 cm	Ammonium_N_kg_per_ha	27.0662
2013-11-08	88	C	88	Control	150-180 cm	Ammonium_N_kg_per_ha	18.4651
2013-11-08	88	D	88	DM + A	150-180 cm	Ammonium_N_kg_per_ha	20.2481
2013-11-08	88	E	88	DM	150-180 cm	Ammonium_N_kg_per_ha	21.3248
2013-11-08	89	A	89	Control	150-180 cm	Ammonium_N_kg_per_ha	22.5643
2013-11-08	89	B	89	Urea	150-180 cm	Ammonium_N_kg_per_ha	15.9185
2013-11-08	89	C	89	SU	150-180 cm	Ammonium_N_kg_per_ha	21.4318
2013-11-08	89	D	89	DM	150-180 cm	Ammonium_N_kg_per_ha	18.3974
2013-11-08	89	E	89	DM + A	150-180 cm	Ammonium_N_kg_per_ha	16.4684
2015-11-24	85	A	85	DM + A	0-7.6 cm	Ammonium_N_kg_per_ha	5.57
2015-11-24	85	B	85	DM	0-7.6 cm	Ammonium_N_kg_per_ha	5.26971
2015-11-24	85	C	85	Urea	0-7.6 cm	Ammonium_N_kg_per_ha	4.97647
2015-11-24	85	D	85	SU	0-7.6 cm	Ammonium_N_kg_per_ha	6.33558
2015-11-24	85	E	85	Control	0-7.6 cm	Ammonium_N_kg_per_ha	5.35064
2015-11-24	86	A	86	DM	0-7.6 cm	Ammonium_N_kg_per_ha	5.50599
2015-11-24	86	B	86	DM + A	0-7.6 cm	Ammonium_N_kg_per_ha	6.49629
2015-11-24	86	C	86	SU	0-7.6 cm	Ammonium_N_kg_per_ha	5.63314
2015-11-24	86	D	86	Urea	0-7.6 cm	Ammonium_N_kg_per_ha	6.00653
2015-11-24	86	E	86	Control	0-7.6 cm	Ammonium_N_kg_per_ha	5.46957
2015-11-24	88	A	88	SU	0-7.6 cm	Ammonium_N_kg_per_ha	11.003
2015-11-24	88	B	88	Urea	0-7.6 cm	Ammonium_N_kg_per_ha	10.0443
2015-11-24	88	C	88	Control	0-7.6 cm	Ammonium_N_kg_per_ha	9.5877
2015-11-24	88	D	88	DM + A	0-7.6 cm	Ammonium_N_kg_per_ha	8.72024
2015-11-24	88	E	88	DM	0-7.6 cm	Ammonium_N_kg_per_ha	8.79689
2015-11-24	89	A	89	Control	0-7.6 cm	Ammonium_N_kg_per_ha	10.3749
2015-11-24	89	B	89	Urea	0-7.6 cm	Ammonium_N_kg_per_ha	9.52815
2015-11-24	89	C	89	SU	0-7.6 cm	Ammonium_N_kg_per_ha	10.9937
2015-11-24	89	D	89	DM	0-7.6 cm	Ammonium_N_kg_per_ha	9.19181
2015-11-24	89	E	89	DM + A	0-7.6 cm	Ammonium_N_kg_per_ha	10.5289
2015-11-24	85	A	85	DM + A	7.6-15 cm	Ammonium_N_kg_per_ha	5.74475
2015-11-24	85	B	85	DM	7.6-15 cm	Ammonium_N_kg_per_ha	5.47079
2015-11-24	85	C	85	Urea	7.6-15 cm	Ammonium_N_kg_per_ha	5.92026
2015-11-24	85	D	85	SU	7.6-15 cm	Ammonium_N_kg_per_ha	5.99918
2015-11-24	85	E	85	Control	7.6-15 cm	Ammonium_N_kg_per_ha	5.38205
2015-11-24	86	A	86	DM	7.6-15 cm	Ammonium_N_kg_per_ha	6.82713
2015-11-24	86	B	86	DM + A	7.6-15 cm	Ammonium_N_kg_per_ha	5.64738
2015-11-24	86	C	86	SU	7.6-15 cm	Ammonium_N_kg_per_ha	6.19318
2015-11-24	86	D	86	Urea	7.6-15 cm	Ammonium_N_kg_per_ha	6.67643
2015-11-24	86	E	86	Control	7.6-15 cm	Ammonium_N_kg_per_ha	7.14345
2015-11-24	88	A	88	SU	7.6-15 cm	Ammonium_N_kg_per_ha	12.0851
2015-11-24	88	B	88	Urea	7.6-15 cm	Ammonium_N_kg_per_ha	13.3529
2015-11-24	88	C	88	Control	7.6-15 cm	Ammonium_N_kg_per_ha	11.8697
2015-11-24	88	D	88	DM + A	7.6-15 cm	Ammonium_N_kg_per_ha	11.9093
2015-11-24	88	E	88	DM	7.6-15 cm	Ammonium_N_kg_per_ha	10.4043
2015-11-24	89	A	89	Control	7.6-15 cm	Ammonium_N_kg_per_ha	13.0637
2015-11-24	89	B	89	Urea	7.6-15 cm	Ammonium_N_kg_per_ha	10.341
2015-11-24	89	C	89	SU	7.6-15 cm	Ammonium_N_kg_per_ha	14.532
2015-11-24	89	D	89	DM	7.6-15 cm	Ammonium_N_kg_per_ha	11.8499
2015-11-24	89	E	89	DM + A	7.6-15 cm	Ammonium_N_kg_per_ha	12.7701
2015-11-24	85	A	85	DM + A	15-30 cm	Ammonium_N_kg_per_ha	10.0225
2015-11-24	85	B	85	DM	15-30 cm	Ammonium_N_kg_per_ha	9.67855
2015-11-24	85	C	85	Urea	15-30 cm	Ammonium_N_kg_per_ha	11.2094
2015-11-24	85	D	85	SU	15-30 cm	Ammonium_N_kg_per_ha	11.47
2015-11-24	85	E	85	Control	15-30 cm	Ammonium_N_kg_per_ha	11.5439
2015-11-24	86	A	86	DM	15-30 cm	Ammonium_N_kg_per_ha	13.0288
2015-11-24	86	B	86	DM + A	15-30 cm	Ammonium_N_kg_per_ha	11.7687
2015-11-24	86	C	86	SU	15-30 cm	Ammonium_N_kg_per_ha	12.2757
2015-11-24	86	D	86	Urea	15-30 cm	Ammonium_N_kg_per_ha	13.0288
2015-11-24	86	E	86	Control	15-30 cm	Ammonium_N_kg_per_ha	14.2157
2015-11-24	88	A	88	SU	15-30 cm	Ammonium_N_kg_per_ha	19.4592
2015-11-24	88	B	88	Urea	15-30 cm	Ammonium_N_kg_per_ha	20.7755
2015-11-24	88	C	88	Control	15-30 cm	Ammonium_N_kg_per_ha	20.2257
2015-11-24	88	D	88	DM + A	15-30 cm	Ammonium_N_kg_per_ha	18.6436
2015-11-24	88	E	88	DM	15-30 cm	Ammonium_N_kg_per_ha	17.5949
2015-11-24	89	A	89	Control	15-30 cm	Ammonium_N_kg_per_ha	24.3176
2015-11-24	89	B	89	Urea	15-30 cm	Ammonium_N_kg_per_ha	18.2382
2015-11-24	89	C	89	SU	15-30 cm	Ammonium_N_kg_per_ha	20.3914
2015-11-24	89	D	89	DM	15-30 cm	Ammonium_N_kg_per_ha	17.7409
2015-11-24	89	E	89	DM + A	15-30 cm	Ammonium_N_kg_per_ha	17.9146
2015-11-24	85	B	85	DM	30-61 cm	Ammonium_N_kg_per_ha	43.4344
2015-11-24	85	C	85	Urea	30-61 cm	Ammonium_N_kg_per_ha	40.1187
2015-11-24	85	D	85	SU	30-61 cm	Ammonium_N_kg_per_ha	51.4944
2015-11-24	85	E	85	Control	30-61 cm	Ammonium_N_kg_per_ha	52.3399
2015-11-24	86	A	86	DM	30-61 cm	Ammonium_N_kg_per_ha	17.3643
2015-11-24	86	B	86	DM + A	30-61 cm	Ammonium_N_kg_per_ha	27.5841
2015-11-24	86	C	86	SU	30-61 cm	Ammonium_N_kg_per_ha	15.0255
2015-11-24	86	D	86	Urea	30-61 cm	Ammonium_N_kg_per_ha	20.5199
2015-11-24	86	E	86	Control	30-61 cm	Ammonium_N_kg_per_ha	21.1254
2015-11-24	88	A	88	SU	30-61 cm	Ammonium_N_kg_per_ha	18.465
2015-11-24	88	B	88	Urea	30-61 cm	Ammonium_N_kg_per_ha	42.1611
2015-11-24	88	C	88	Control	30-61 cm	Ammonium_N_kg_per_ha	16.9207
2015-11-24	88	D	88	DM + A	30-61 cm	Ammonium_N_kg_per_ha	16.1692
2015-11-24	88	E	88	DM	30-61 cm	Ammonium_N_kg_per_ha	18.5015
2015-11-24	89	A	89	Control	30-61 cm	Ammonium_N_kg_per_ha	48.3771
2015-11-24	89	B	89	Urea	30-61 cm	Ammonium_N_kg_per_ha	19.9144
2015-11-24	89	C	89	SU	30-61 cm	Ammonium_N_kg_per_ha	14.799
2015-11-24	89	D	89	DM	30-61 cm	Ammonium_N_kg_per_ha	21.5515
2015-11-24	89	E	89	DM + A	30-61 cm	Ammonium_N_kg_per_ha	20.8114
2015-11-24	85	A	85	DM + A	61-91 cm	Ammonium_N_kg_per_ha	46.7305
2015-11-24	85	B	85	DM	61-91 cm	Ammonium_N_kg_per_ha	57.235
2015-11-24	85	C	85	Urea	61-91 cm	Ammonium_N_kg_per_ha	39.7959
2015-11-24	85	D	85	SU	61-91 cm	Ammonium_N_kg_per_ha	42.2235
2015-11-24	85	E	85	Control	61-91 cm	Ammonium_N_kg_per_ha	31.791
2015-11-24	86	A	86	DM	61-91 cm	Ammonium_N_kg_per_ha	45.5907
2015-11-24	86	B	86	DM + A	61-91 cm	Ammonium_N_kg_per_ha	23.2899
2015-11-24	86	C	86	SU	61-91 cm	Ammonium_N_kg_per_ha	39.2731
2015-11-24	86	D	86	Urea	61-91 cm	Ammonium_N_kg_per_ha	23.5966
2015-11-24	86	E	86	Control	61-91 cm	Ammonium_N_kg_per_ha	19.0975
2015-11-24	88	A	88	SU	61-91 cm	Ammonium_N_kg_per_ha	19.5417
2015-11-24	88	B	88	Urea	61-91 cm	Ammonium_N_kg_per_ha	57.8641
2015-11-24	88	C	88	Control	61-91 cm	Ammonium_N_kg_per_ha	38.7168
2015-11-24	88	D	88	DM + A	61-91 cm	Ammonium_N_kg_per_ha	20.6069
2015-11-24	88	E	88	DM	61-91 cm	Ammonium_N_kg_per_ha	40.482
2015-11-24	89	A	89	Control	61-91 cm	Ammonium_N_kg_per_ha	32.3561
2015-11-24	89	B	89	Urea	61-91 cm	Ammonium_N_kg_per_ha	24.7009
2015-11-24	89	C	89	SU	61-91 cm	Ammonium_N_kg_per_ha	21.6133
2015-11-24	89	D	89	DM	61-91 cm	Ammonium_N_kg_per_ha	33.4476
2015-11-24	89	E	89	DM + A	61-91 cm	Ammonium_N_kg_per_ha	24.7009
2015-11-24	85	A	85	DM + A	91-120 cm	Ammonium_N_kg_per_ha	40.4779
2015-11-24	85	B	85	DM	91-120 cm	Ammonium_N_kg_per_ha	40.3432
2015-11-24	85	C	85	Urea	91-120 cm	Ammonium_N_kg_per_ha	38.4492
2015-11-24	85	D	85	SU	91-120 cm	Ammonium_N_kg_per_ha	28.5533
2015-11-24	85	E	85	Control	91-120 cm	Ammonium_N_kg_per_ha	34.9669
2015-11-24	86	A	86	DM	91-120 cm	Ammonium_N_kg_per_ha	32.7126
2015-11-24	86	B	86	DM + A	91-120 cm	Ammonium_N_kg_per_ha	24.3248
2015-11-24	86	C	86	SU	91-120 cm	Ammonium_N_kg_per_ha	13.7807
2015-11-24	86	D	86	Urea	91-120 cm	Ammonium_N_kg_per_ha	15.2284
2015-11-24	86	E	86	Control	91-120 cm	Ammonium_N_kg_per_ha	31.873
2015-11-24	88	A	88	SU	91-120 cm	Ammonium_N_kg_per_ha	15.0387
2015-11-24	88	B	88	Urea	91-120 cm	Ammonium_N_kg_per_ha	31.5781
2015-11-24	88	C	88	Control	91-120 cm	Ammonium_N_kg_per_ha	34.3394
2015-11-24	88	D	88	DM + A	91-120 cm	Ammonium_N_kg_per_ha	15.4622
2015-11-24	88	E	88	DM	91-120 cm	Ammonium_N_kg_per_ha	16.0047
2015-11-24	89	A	89	Control	91-120 cm	Ammonium_N_kg_per_ha	25.7163
2015-11-24	89	B	89	Urea	91-120 cm	Ammonium_N_kg_per_ha	23.1074
2015-11-24	89	C	89	SU	91-120 cm	Ammonium_N_kg_per_ha	18.8517
2015-11-24	89	D	89	DM	91-120 cm	Ammonium_N_kg_per_ha	18.5096
2015-11-24	89	E	89	DM + A	91-120 cm	Ammonium_N_kg_per_ha	16.2428
2015-11-24	85	B	85	DM	120-150 cm	Ammonium_N_kg_per_ha	41.9994
2015-11-24	85	C	85	Urea	120-150 cm	Ammonium_N_kg_per_ha	41.0814
2015-11-24	85	D	85	SU	120-150 cm	Ammonium_N_kg_per_ha	54.5755
2015-11-24	85	E	85	Control	120-150 cm	Ammonium_N_kg_per_ha	53.417
2015-11-24	86	A	86	DM	120-150 cm	Ammonium_N_kg_per_ha	18.4394
2015-11-24	86	B	86	DM + A	120-150 cm	Ammonium_N_kg_per_ha	21.8139
2015-11-24	86	C	86	SU	120-150 cm	Ammonium_N_kg_per_ha	31.7961
2015-11-24	86	D	86	Urea	120-150 cm	Ammonium_N_kg_per_ha	16.7523
2015-11-24	86	E	86	Control	120-150 cm	Ammonium_N_kg_per_ha	16.1289
2015-11-24	88	A	88	SU	120-150 cm	Ammonium_N_kg_per_ha	21.5682
2015-11-24	88	B	88	Urea	120-150 cm	Ammonium_N_kg_per_ha	23.5708
2015-11-24	88	C	88	Control	120-150 cm	Ammonium_N_kg_per_ha	33.6382
2015-11-24	88	D	88	DM + A	120-150 cm	Ammonium_N_kg_per_ha	39.4945
2015-11-24	88	E	88	DM	120-150 cm	Ammonium_N_kg_per_ha	31.5325
2015-11-24	89	A	89	Control	120-150 cm	Ammonium_N_kg_per_ha	31.5325
2015-11-24	89	B	89	Urea	120-150 cm	Ammonium_N_kg_per_ha	24.1224
2015-11-24	89	C	89	SU	120-150 cm	Ammonium_N_kg_per_ha	21.5332
2015-11-24	89	D	89	DM	120-150 cm	Ammonium_N_kg_per_ha	23.6889
2015-11-24	89	E	89	DM + A	120-150 cm	Ammonium_N_kg_per_ha	21.3319
2016-11-16	85	A	85	DM + A	0-7.6 cm	Ammonium_N_kg_per_ha	11.1839
2016-11-16	85	B	85	DM	0-7.6 cm	Ammonium_N_kg_per_ha	9.31649
2016-11-16	85	C	85	Urea	0-7.6 cm	Ammonium_N_kg_per_ha	9.23168
2016-11-16	85	D	85	SU	0-7.6 cm	Ammonium_N_kg_per_ha	24.7115
2016-11-16	85	E	85	Control	0-7.6 cm	Ammonium_N_kg_per_ha	9.58864
2016-11-16	86	A	86	DM	0-7.6 cm	Ammonium_N_kg_per_ha	8.95003
2016-11-16	86	B	86	DM + A	0-7.6 cm	Ammonium_N_kg_per_ha	6.31598
2016-11-16	86	C	86	SU	0-7.6 cm	Ammonium_N_kg_per_ha	15.8874
2016-11-16	86	D	86	Urea	0-7.6 cm	Ammonium_N_kg_per_ha	19.383
2016-11-16	86	E	86	Control	0-7.6 cm	Ammonium_N_kg_per_ha	6.78784
2016-11-16	88	A	88	SU	0-7.6 cm	Ammonium_N_kg_per_ha	8.89927
2016-11-16	88	B	88	Urea	0-7.6 cm	Ammonium_N_kg_per_ha	6.26528
2016-11-16	88	C	88	Control	0-7.6 cm	Ammonium_N_kg_per_ha	18.2235
2016-11-16	88	D	88	DM + A	0-7.6 cm	Ammonium_N_kg_per_ha	7.43581
2016-11-16	88	E	88	DM	0-7.6 cm	Ammonium_N_kg_per_ha	8.08727
2016-11-16	89	A	89	Control	0-7.6 cm	Ammonium_N_kg_per_ha	7.33714
2016-11-16	89	B	89	Urea	0-7.6 cm	Ammonium_N_kg_per_ha	13.0162
2016-11-16	89	C	89	SU	0-7.6 cm	Ammonium_N_kg_per_ha	9.60951
2016-11-16	89	D	89	DM	0-7.6 cm	Ammonium_N_kg_per_ha	24.4315
2016-11-16	89	E	89	DM + A	0-7.6 cm	Ammonium_N_kg_per_ha	13.1772
2016-11-16	85	A	85	DM + A	7.6-15 cm	Ammonium_N_kg_per_ha	10.2675
2016-11-16	85	B	85	DM	7.6-15 cm	Ammonium_N_kg_per_ha	9.75002
2016-11-16	85	C	85	Urea	7.6-15 cm	Ammonium_N_kg_per_ha	11.1759
2016-11-16	85	D	85	SU	7.6-15 cm	Ammonium_N_kg_per_ha	19.0639
2016-11-16	85	E	85	Control	7.6-15 cm	Ammonium_N_kg_per_ha	10.4195
2016-11-16	86	A	86	DM	7.6-15 cm	Ammonium_N_kg_per_ha	14.0578
2016-11-16	86	B	86	DM + A	7.6-15 cm	Ammonium_N_kg_per_ha	11.0141
2016-11-16	86	C	86	SU	7.6-15 cm	Ammonium_N_kg_per_ha	7.69835
2016-11-16	86	D	86	Urea	7.6-15 cm	Ammonium_N_kg_per_ha	7.17804
2016-11-16	86	E	86	Control	7.6-15 cm	Ammonium_N_kg_per_ha	7.87168
2016-11-16	88	A	88	SU	7.6-15 cm	Ammonium_N_kg_per_ha	7.77204
2016-11-16	88	B	88	Urea	7.6-15 cm	Ammonium_N_kg_per_ha	8.01946
2016-11-16	88	C	88	Control	7.6-15 cm	Ammonium_N_kg_per_ha	24.1872
2016-11-16	88	D	88	DM + A	7.6-15 cm	Ammonium_N_kg_per_ha	9.09777
2016-11-16	88	E	88	DM	7.6-15 cm	Ammonium_N_kg_per_ha	11.2831
2016-11-16	89	A	89	Control	7.6-15 cm	Ammonium_N_kg_per_ha	8.6403
2016-11-16	89	B	89	Urea	7.6-15 cm	Ammonium_N_kg_per_ha	13.4424
2016-11-16	89	C	89	SU	7.6-15 cm	Ammonium_N_kg_per_ha	11.5636
2016-11-16	89	D	89	DM	7.6-15 cm	Ammonium_N_kg_per_ha	18.494
2016-11-16	85	A	85	DM + A	15-30 cm	Ammonium_N_kg_per_ha	15.1945
2016-11-16	85	B	85	DM	15-30 cm	Ammonium_N_kg_per_ha	8.37963
2016-11-16	85	C	85	Urea	15-30 cm	Ammonium_N_kg_per_ha	14.7445
2016-11-16	85	D	85	SU	15-30 cm	Ammonium_N_kg_per_ha	15.7011
2016-11-16	85	E	85	Control	15-30 cm	Ammonium_N_kg_per_ha	9.39558
2016-11-16	86	A	86	DM	15-30 cm	Ammonium_N_kg_per_ha	9.46573
2016-11-16	86	B	86	DM + A	15-30 cm	Ammonium_N_kg_per_ha	28.9534
2016-11-16	86	C	86	SU	15-30 cm	Ammonium_N_kg_per_ha	30.3067
2016-11-16	86	D	86	Urea	15-30 cm	Ammonium_N_kg_per_ha	13.8056
2016-11-16	86	E	86	Control	15-30 cm	Ammonium_N_kg_per_ha	12.0012
2016-11-16	88	A	88	SU	15-30 cm	Ammonium_N_kg_per_ha	8.49661
2016-11-16	88	B	88	Urea	15-30 cm	Ammonium_N_kg_per_ha	12.2869
2016-11-16	88	C	88	Control	15-30 cm	Ammonium_N_kg_per_ha	14.011
2016-11-16	88	D	88	DM + A	15-30 cm	Ammonium_N_kg_per_ha	10.1412
2016-11-16	88	E	88	DM	15-30 cm	Ammonium_N_kg_per_ha	11.3177
2016-11-16	89	A	89	Control	15-30 cm	Ammonium_N_kg_per_ha	15.1814
2016-11-16	89	B	89	Urea	15-30 cm	Ammonium_N_kg_per_ha	25.147
2016-11-16	89	C	89	SU	15-30 cm	Ammonium_N_kg_per_ha	29.4072
2016-11-16	89	D	89	DM	15-30 cm	Ammonium_N_kg_per_ha	32.5227
2016-11-16	85	A	85	DM + A	30-61 cm	Ammonium_N_kg_per_ha	37.2273
2016-11-16	85	B	85	DM	30-61 cm	Ammonium_N_kg_per_ha	24.6277
2016-11-16	85	C	85	Urea	30-61 cm	Ammonium_N_kg_per_ha	13.6133
2016-11-16	85	D	85	SU	30-61 cm	Ammonium_N_kg_per_ha	42.9866
2016-11-16	85	E	85	Control	30-61 cm	Ammonium_N_kg_per_ha	32.0048
2016-11-16	86	A	86	DM	30-61 cm	Ammonium_N_kg_per_ha	28.9779
2016-11-16	86	B	86	DM + A	30-61 cm	Ammonium_N_kg_per_ha	11.8607
2016-11-16	86	C	86	SU	30-61 cm	Ammonium_N_kg_per_ha	12.6708
2016-11-16	86	D	86	Urea	30-61 cm	Ammonium_N_kg_per_ha	12.5765
2016-11-16	86	E	86	Control	30-61 cm	Ammonium_N_kg_per_ha	11.993
2016-11-16	88	A	88	SU	30-61 cm	Ammonium_N_kg_per_ha	11.7765
2016-11-16	88	B	88	Urea	30-61 cm	Ammonium_N_kg_per_ha	46.5771
2016-11-16	88	C	88	Control	30-61 cm	Ammonium_N_kg_per_ha	14.4216
2016-11-16	88	D	88	DM + A	30-61 cm	Ammonium_N_kg_per_ha	23.5083
2016-11-16	88	E	88	DM	30-61 cm	Ammonium_N_kg_per_ha	8.94783
2016-11-16	89	A	89	Control	30-61 cm	Ammonium_N_kg_per_ha	23.4693
2016-11-16	89	B	89	Urea	30-61 cm	Ammonium_N_kg_per_ha	23.362
2016-11-16	89	C	89	SU	30-61 cm	Ammonium_N_kg_per_ha	31.2764
2016-11-16	89	D	89	DM	30-61 cm	Ammonium_N_kg_per_ha	40.6589
2016-11-16	89	E	89	DM + A	30-61 cm	Ammonium_N_kg_per_ha	37.4516
2016-11-16	85	A	85	DM + A	61-91 cm	Ammonium_N_kg_per_ha	19.7636
2016-11-16	85	B	85	DM	61-91 cm	Ammonium_N_kg_per_ha	14.912
2016-11-16	85	C	85	Urea	61-91 cm	Ammonium_N_kg_per_ha	15.8656
2016-11-16	85	D	85	SU	61-91 cm	Ammonium_N_kg_per_ha	18.6694
2016-11-16	85	E	85	Control	61-91 cm	Ammonium_N_kg_per_ha	14.6147
2016-11-16	86	A	86	DM	61-91 cm	Ammonium_N_kg_per_ha	35.2804
2016-11-16	86	B	86	DM + A	61-91 cm	Ammonium_N_kg_per_ha	11.3511
2016-11-16	86	C	86	SU	61-91 cm	Ammonium_N_kg_per_ha	32.9345
2016-11-16	86	D	86	Urea	61-91 cm	Ammonium_N_kg_per_ha	12.9008
2016-11-16	86	E	86	Control	61-91 cm	Ammonium_N_kg_per_ha	13.6086
2016-11-16	88	A	88	SU	61-91 cm	Ammonium_N_kg_per_ha	16.2157
2016-11-16	88	B	88	Urea	61-91 cm	Ammonium_N_kg_per_ha	13.2653
2016-11-16	88	C	88	Control	61-91 cm	Ammonium_N_kg_per_ha	29.7326
2016-11-16	88	D	88	DM + A	61-91 cm	Ammonium_N_kg_per_ha	9.18664
2016-11-16	88	E	88	DM	61-91 cm	Ammonium_N_kg_per_ha	13.9976
2016-11-16	89	A	89	Control	61-91 cm	Ammonium_N_kg_per_ha	36.884
2016-11-16	89	B	89	Urea	61-91 cm	Ammonium_N_kg_per_ha	27.3076
2016-11-16	89	C	89	SU	61-91 cm	Ammonium_N_kg_per_ha	35.3915
2016-11-16	89	D	89	DM	61-91 cm	Ammonium_N_kg_per_ha	34.8803
2016-11-16	89	E	89	DM + A	61-91 cm	Ammonium_N_kg_per_ha	36.1967
2016-11-16	85	A	85	DM + A	91-120 cm	Ammonium_N_kg_per_ha	13.1258
2016-11-16	85	B	85	DM	91-120 cm	Ammonium_N_kg_per_ha	38.5776
2016-11-16	85	C	85	Urea	91-120 cm	Ammonium_N_kg_per_ha	11.2317
2016-11-16	85	D	85	SU	91-120 cm	Ammonium_N_kg_per_ha	28.6478
2016-11-16	85	E	85	Control	91-120 cm	Ammonium_N_kg_per_ha	31.1142
2016-11-16	86	A	86	DM	91-120 cm	Ammonium_N_kg_per_ha	13.9128
2016-11-16	86	B	86	DM + A	91-120 cm	Ammonium_N_kg_per_ha	32.4422
2016-11-16	86	C	86	SU	91-120 cm	Ammonium_N_kg_per_ha	26.6497
2016-11-16	86	D	86	Urea	91-120 cm	Ammonium_N_kg_per_ha	12.5254
2016-11-16	86	E	86	Control	91-120 cm	Ammonium_N_kg_per_ha	19.0981
2016-11-16	88	A	88	SU	91-120 cm	Ammonium_N_kg_per_ha	8.72148
2016-11-16	88	B	88	Urea	91-120 cm	Ammonium_N_kg_per_ha	12.5805
2016-11-16	88	C	88	Control	91-120 cm	Ammonium_N_kg_per_ha	22.9945
2016-11-16	88	D	88	DM + A	91-120 cm	Ammonium_N_kg_per_ha	9.11421
2016-11-16	88	E	88	DM	91-120 cm	Ammonium_N_kg_per_ha	18.9784
2016-11-16	89	A	89	Control	91-120 cm	Ammonium_N_kg_per_ha	24.7048
2016-11-16	89	B	89	Urea	91-120 cm	Ammonium_N_kg_per_ha	24.1347
2016-11-16	89	C	89	SU	91-120 cm	Ammonium_N_kg_per_ha	30.0653
2016-11-16	89	D	89	DM	91-120 cm	Ammonium_N_kg_per_ha	35.917
2016-11-16	89	E	89	DM + A	91-120 cm	Ammonium_N_kg_per_ha	31.5989
2016-11-16	85	A	85	DM + A	120-150 cm	Ammonium_N_kg_per_ha	12.9835
2016-11-16	85	B	85	DM	120-150 cm	Ammonium_N_kg_per_ha	39.8638
2016-11-16	85	C	85	Urea	120-150 cm	Ammonium_N_kg_per_ha	19.4012
2016-11-16	85	D	85	SU	120-150 cm	Ammonium_N_kg_per_ha	31.2693
2016-11-16	85	E	85	Control	120-150 cm	Ammonium_N_kg_per_ha	16.6923
2016-11-16	86	A	86	DM	120-150 cm	Ammonium_N_kg_per_ha	46.9039
2016-11-16	86	B	86	DM + A	120-150 cm	Ammonium_N_kg_per_ha	24.7083
2016-11-16	86	C	86	SU	120-150 cm	Ammonium_N_kg_per_ha	14.1422
2016-11-16	86	D	86	Urea	120-150 cm	Ammonium_N_kg_per_ha	16.2944
2016-11-16	86	E	86	Control	120-150 cm	Ammonium_N_kg_per_ha	21.5796
2016-11-16	88	A	88	SU	120-150 cm	Ammonium_N_kg_per_ha	11.2948
2016-11-16	88	B	88	Urea	120-150 cm	Ammonium_N_kg_per_ha	37.0784
2016-11-16	88	C	88	Control	120-150 cm	Ammonium_N_kg_per_ha	22.7787
2016-11-16	88	D	88	DM + A	120-150 cm	Ammonium_N_kg_per_ha	27.3334
2016-11-16	88	E	88	DM	120-150 cm	Ammonium_N_kg_per_ha	15.8032
2016-11-16	89	A	89	Control	120-150 cm	Ammonium_N_kg_per_ha	26.2508
2016-11-16	89	B	89	Urea	120-150 cm	Ammonium_N_kg_per_ha	23.4283
2016-11-16	89	C	89	SU	120-150 cm	Ammonium_N_kg_per_ha	33.2199
2016-11-16	89	D	89	DM	120-150 cm	Ammonium_N_kg_per_ha	40.2039
2016-11-16	89	E	89	DM + A	120-150 cm	Ammonium_N_kg_per_ha	48.9542
2017-11-13	85	A	85	DM + SU	0-7.6 cm	Ammonium_N_kg_per_ha	13.37
2017-11-13	86	A	86	DM	0-7.6 cm	Ammonium_N_kg_per_ha	19.1979
2017-11-13	86	B	86	DM + SU	0-7.6 cm	Ammonium_N_kg_per_ha	27.4949
2017-11-13	86	C	86	SU	0-7.6 cm	Ammonium_N_kg_per_ha	21.5444
2017-11-13	86	D	86	Urea	0-7.6 cm	Ammonium_N_kg_per_ha	22.4895
2017-11-13	86	E	86	Control	0-7.6 cm	Ammonium_N_kg_per_ha	12.4572
2017-11-13	88	A	88	SU	0-7.6 cm	Ammonium_N_kg_per_ha	16.3608
2017-11-13	88	B	88	Urea	0-7.6 cm	Ammonium_N_kg_per_ha	16.5792
2017-11-13	88	C	88	Control	0-7.6 cm	Ammonium_N_kg_per_ha	14.9101
2017-11-13	88	D	88	DM + SU	0-7.6 cm	Ammonium_N_kg_per_ha	19.5552
2017-11-13	88	E	88	DM	0-7.6 cm	Ammonium_N_kg_per_ha	17.9445
2017-11-13	89	A	89	Control	0-7.6 cm	Ammonium_N_kg_per_ha	14.0503
2017-11-13	89	B	89	Urea	0-7.6 cm	Ammonium_N_kg_per_ha	14.9098
2017-11-13	89	C	89	SU	0-7.6 cm	Ammonium_N_kg_per_ha	16.29
2017-11-13	89	D	89	DM	0-7.6 cm	Ammonium_N_kg_per_ha	15.479
2017-11-13	89	E	89	DM + SU	0-7.6 cm	Ammonium_N_kg_per_ha	16.2177
2017-11-13	85	A	85	DM + SU	7.6-15 cm	Ammonium_N_kg_per_ha	10.9678
2017-11-13	86	A	86	DM	7.6-15 cm	Ammonium_N_kg_per_ha	26.0078
2017-11-13	86	B	86	DM + SU	7.6-15 cm	Ammonium_N_kg_per_ha	19.2152
2017-11-13	86	C	86	SU	7.6-15 cm	Ammonium_N_kg_per_ha	16.2098
2017-11-13	86	D	86	Urea	7.6-15 cm	Ammonium_N_kg_per_ha	14.8403
2017-11-13	86	E	86	Control	7.6-15 cm	Ammonium_N_kg_per_ha	14.178
2017-11-13	88	A	88	SU	7.6-15 cm	Ammonium_N_kg_per_ha	15.2059
2017-11-13	88	B	88	Urea	7.6-15 cm	Ammonium_N_kg_per_ha	21.1941
2017-11-13	88	C	88	Control	7.6-15 cm	Ammonium_N_kg_per_ha	16.0008
2017-11-13	88	D	88	DM + SU	7.6-15 cm	Ammonium_N_kg_per_ha	19.0158
2017-11-13	88	E	88	DM	7.6-15 cm	Ammonium_N_kg_per_ha	14.6045
2017-11-13	89	A	89	Control	7.6-15 cm	Ammonium_N_kg_per_ha	16.1567
2017-11-13	89	B	89	Urea	7.6-15 cm	Ammonium_N_kg_per_ha	13.3315
2017-11-13	89	C	89	SU	7.6-15 cm	Ammonium_N_kg_per_ha	15.5871
2017-11-13	89	D	89	DM	7.6-15 cm	Ammonium_N_kg_per_ha	14.5964
2017-11-13	89	E	89	DM + SU	7.6-15 cm	Ammonium_N_kg_per_ha	14.6747
2017-11-13	85	A	85	DM + SU	15-30 cm	Ammonium_N_kg_per_ha	20.0242
2017-11-13	86	A	86	DM	15-30 cm	Ammonium_N_kg_per_ha	43.2301
2017-11-13	86	B	86	DM + SU	15-30 cm	Ammonium_N_kg_per_ha	35.8367
2017-11-13	86	C	86	SU	15-30 cm	Ammonium_N_kg_per_ha	24.9719
2017-11-13	86	D	86	Urea	15-30 cm	Ammonium_N_kg_per_ha	30.8001
2017-11-13	86	E	86	Control	15-30 cm	Ammonium_N_kg_per_ha	27.6637
2017-11-13	88	A	88	SU	15-30 cm	Ammonium_N_kg_per_ha	26.5848
2017-11-13	88	B	88	Urea	15-30 cm	Ammonium_N_kg_per_ha	28.2086
2017-11-13	88	C	88	Control	15-30 cm	Ammonium_N_kg_per_ha	21.4362
2017-11-13	88	D	88	DM + SU	15-30 cm	Ammonium_N_kg_per_ha	26.7653
2017-11-13	88	E	88	DM	15-30 cm	Ammonium_N_kg_per_ha	24.6222
2017-11-13	89	A	89	Control	15-30 cm	Ammonium_N_kg_per_ha	33.33
2017-11-13	89	B	89	Urea	15-30 cm	Ammonium_N_kg_per_ha	32.9995
2017-11-13	89	C	89	SU	15-30 cm	Ammonium_N_kg_per_ha	21.1141
2017-11-13	89	D	89	DM	15-30 cm	Ammonium_N_kg_per_ha	29.0521
2017-11-13	89	E	89	DM + SU	15-30 cm	Ammonium_N_kg_per_ha	21.7824
2017-11-13	85	A	85	DM + SU	30-61 cm	Ammonium_N_kg_per_ha	29.6025
2017-11-13	85	B	85	DM	30-61 cm	Ammonium_N_kg_per_ha	26.2386
2017-11-13	85	C	85	Urea	30-61 cm	Ammonium_N_kg_per_ha	22.1794
2017-11-13	85	D	85	SU	30-61 cm	Ammonium_N_kg_per_ha	38.0267
2017-11-13	85	E	85	Control	30-61 cm	Ammonium_N_kg_per_ha	25.694
2017-11-13	86	A	86	DM	30-61 cm	Ammonium_N_kg_per_ha	31.7264
2017-11-13	86	B	86	DM + SU	30-61 cm	Ammonium_N_kg_per_ha	35.4333
2017-11-13	86	C	86	SU	30-61 cm	Ammonium_N_kg_per_ha	36.5546
2017-11-13	86	D	86	Urea	30-61 cm	Ammonium_N_kg_per_ha	34.0333
2017-11-13	86	E	86	Control	30-61 cm	Ammonium_N_kg_per_ha	28.5286
2017-11-13	88	A	88	SU	30-61 cm	Ammonium_N_kg_per_ha	54.7197
2017-11-13	88	B	88	Urea	30-61 cm	Ammonium_N_kg_per_ha	31.8451
2017-11-13	88	C	88	Control	30-61 cm	Ammonium_N_kg_per_ha	39.8268
2017-11-13	88	D	88	DM + SU	30-61 cm	Ammonium_N_kg_per_ha	32.2936
2017-11-13	88	E	88	DM	30-61 cm	Ammonium_N_kg_per_ha	60.3262
2017-11-13	89	A	89	Control	30-61 cm	Ammonium_N_kg_per_ha	37.0648
2017-11-13	89	C	89	SU	30-61 cm	Ammonium_N_kg_per_ha	64.1278
2017-11-13	89	D	89	DM	30-61 cm	Ammonium_N_kg_per_ha	74.9032
2017-11-13	89	E	89	DM + SU	30-61 cm	Ammonium_N_kg_per_ha	55.4848
2017-11-13	85	A	85	DM + SU	61-91 cm	Ammonium_N_kg_per_ha	33.0445
2017-11-13	85	B	85	DM	61-91 cm	Ammonium_N_kg_per_ha	29.7821
2017-11-13	85	C	85	Urea	61-91 cm	Ammonium_N_kg_per_ha	31.1048
2017-11-13	85	D	85	SU	61-91 cm	Ammonium_N_kg_per_ha	29.1921
2017-11-13	85	E	85	Control	61-91 cm	Ammonium_N_kg_per_ha	33.5035
2017-11-13	86	A	86	DM	61-91 cm	Ammonium_N_kg_per_ha	27.996
2017-11-13	86	B	86	DM + SU	61-91 cm	Ammonium_N_kg_per_ha	29.5039
2017-11-13	86	C	86	SU	61-91 cm	Ammonium_N_kg_per_ha	38.1315
2017-11-13	86	D	86	Urea	61-91 cm	Ammonium_N_kg_per_ha	33.0998
2017-11-13	86	E	86	Control	61-91 cm	Ammonium_N_kg_per_ha	30.0613
2017-11-13	88	A	88	SU	61-91 cm	Ammonium_N_kg_per_ha	32.9894
2017-11-13	88	B	88	Urea	61-91 cm	Ammonium_N_kg_per_ha	32.9894
2017-11-13	88	C	88	Control	61-91 cm	Ammonium_N_kg_per_ha	32.4232
2017-11-13	88	D	88	DM + SU	61-91 cm	Ammonium_N_kg_per_ha	28.3603
2017-11-13	88	E	88	DM	61-91 cm	Ammonium_N_kg_per_ha	44.2964
2017-11-13	89	A	89	Control	61-91 cm	Ammonium_N_kg_per_ha	34.1919
2017-11-13	89	B	89	Urea	61-91 cm	Ammonium_N_kg_per_ha	62.0843
2017-11-13	89	C	89	SU	61-91 cm	Ammonium_N_kg_per_ha	60.3521
2017-11-13	89	D	89	DM	61-91 cm	Ammonium_N_kg_per_ha	59.1061
2017-11-13	89	E	89	DM + SU	61-91 cm	Ammonium_N_kg_per_ha	59.138
2017-11-13	85	A	85	DM + SU	91-120 cm	Ammonium_N_kg_per_ha	30.3553
2017-11-13	85	B	85	DM	91-120 cm	Ammonium_N_kg_per_ha	24.2035
2017-11-13	85	C	85	Urea	91-120 cm	Ammonium_N_kg_per_ha	22.0869
2017-11-13	85	D	85	SU	91-120 cm	Ammonium_N_kg_per_ha	24.8949
2017-11-13	85	E	85	Control	91-120 cm	Ammonium_N_kg_per_ha	25.3172
2017-11-13	86	A	86	DM	91-120 cm	Ammonium_N_kg_per_ha	30.3048
2017-11-13	86	B	86	DM + SU	91-120 cm	Ammonium_N_kg_per_ha	28.1255
2017-11-13	86	C	86	SU	91-120 cm	Ammonium_N_kg_per_ha	25.0014
2017-11-13	86	D	86	Urea	91-120 cm	Ammonium_N_kg_per_ha	22.3126
2017-11-13	86	E	86	Control	91-120 cm	Ammonium_N_kg_per_ha	23.7944
2017-11-13	88	A	88	SU	91-120 cm	Ammonium_N_kg_per_ha	24.812
2017-11-13	88	B	88	Urea	91-120 cm	Ammonium_N_kg_per_ha	23.5253
2017-11-13	88	C	88	Control	91-120 cm	Ammonium_N_kg_per_ha	43.4009
2017-11-13	88	D	88	DM + SU	91-120 cm	Ammonium_N_kg_per_ha	32.7126
2017-11-13	88	E	88	DM	91-120 cm	Ammonium_N_kg_per_ha	43.8986
2017-11-13	89	A	89	Control	91-120 cm	Ammonium_N_kg_per_ha	24.9599
2017-11-13	89	C	89	SU	91-120 cm	Ammonium_N_kg_per_ha	51.9998
2017-11-13	89	D	89	DM	91-120 cm	Ammonium_N_kg_per_ha	43.8986
2017-11-13	89	E	89	DM + SU	91-120 cm	Ammonium_N_kg_per_ha	42.3562
2017-11-13	85	A	85	DM + SU	120-150 cm	Ammonium_N_kg_per_ha	31.4013
2017-11-13	85	B	85	DM	120-150 cm	Ammonium_N_kg_per_ha	42.0959
2017-11-13	85	C	85	Urea	120-150 cm	Ammonium_N_kg_per_ha	34.2916
2017-11-13	85	D	85	SU	120-150 cm	Ammonium_N_kg_per_ha	32.9991
2017-11-13	85	E	85	Control	120-150 cm	Ammonium_N_kg_per_ha	35.7106
2017-11-13	86	A	86	DM	120-150 cm	Ammonium_N_kg_per_ha	30.3217
2017-11-13	86	B	86	DM + SU	120-150 cm	Ammonium_N_kg_per_ha	29.8979
2017-11-13	86	C	86	SU	120-150 cm	Ammonium_N_kg_per_ha	50.8462
2017-11-13	86	D	86	Urea	120-150 cm	Ammonium_N_kg_per_ha	47.4569
2017-11-13	86	E	86	Control	120-150 cm	Ammonium_N_kg_per_ha	29.6606
2017-11-13	88	B	88	Urea	120-150 cm	Ammonium_N_kg_per_ha	61.7249
2017-11-13	88	C	88	Control	120-150 cm	Ammonium_N_kg_per_ha	32.9991
2017-11-13	88	D	88	DM + SU	120-150 cm	Ammonium_N_kg_per_ha	35.0011
2017-11-13	89	A	89	Control	120-150 cm	Ammonium_N_kg_per_ha	53.7414
2017-11-13	89	B	89	Urea	120-150 cm	Ammonium_N_kg_per_ha	59.3212
2017-11-13	89	C	89	SU	120-150 cm	Ammonium_N_kg_per_ha	69.0625
2017-11-13	89	D	89	DM	120-150 cm	Ammonium_N_kg_per_ha	57.2315
2017-11-13	89	E	89	DM + SU	120-150 cm	Ammonium_N_kg_per_ha	64.9276
2012-02-01	85	A	85	DM + A	0-7.6 cm	EquivSeg_Ammonium_N_kg_per_ha	5.11978
2012-02-01	85	B	85	DM	0-7.6 cm	EquivSeg_Ammonium_N_kg_per_ha	4.45672
2012-02-01	85	C	85	Urea	0-7.6 cm	EquivSeg_Ammonium_N_kg_per_ha	6.43512
2012-02-01	85	D	85	SU	0-7.6 cm	EquivSeg_Ammonium_N_kg_per_ha	5.43556
2012-02-01	85	E	85	Control	0-7.6 cm	EquivSeg_Ammonium_N_kg_per_ha	6.0109
2012-02-01	86	A	86	DM	0-7.6 cm	EquivSeg_Ammonium_N_kg_per_ha	7.44197
2012-02-01	86	B	86	DM + A	0-7.6 cm	EquivSeg_Ammonium_N_kg_per_ha	4.15046
2012-02-01	86	C	86	SU	0-7.6 cm	EquivSeg_Ammonium_N_kg_per_ha	4.06657
2012-02-01	86	D	86	Urea	0-7.6 cm	EquivSeg_Ammonium_N_kg_per_ha	4.16445
2012-02-01	86	E	86	Control	0-7.6 cm	EquivSeg_Ammonium_N_kg_per_ha	2.6948
2012-02-01	88	A	88	SU	0-7.6 cm	EquivSeg_Ammonium_N_kg_per_ha	4.41523
2012-02-01	88	B	88	Urea	0-7.6 cm	EquivSeg_Ammonium_N_kg_per_ha	3.41546
2012-02-01	88	C	88	Control	0-7.6 cm	EquivSeg_Ammonium_N_kg_per_ha	2.71459
2012-02-01	88	D	88	DM + A	0-7.6 cm	EquivSeg_Ammonium_N_kg_per_ha	2.90674
2012-02-01	88	E	88	DM	0-7.6 cm	EquivSeg_Ammonium_N_kg_per_ha	2.61867
2012-02-01	89	A	89	Control	0-7.6 cm	EquivSeg_Ammonium_N_kg_per_ha	2.32736
2012-02-01	89	B	89	Urea	0-7.6 cm	EquivSeg_Ammonium_N_kg_per_ha	2.8979
2012-02-01	89	C	89	SU	0-7.6 cm	EquivSeg_Ammonium_N_kg_per_ha	4.88241
2012-02-01	89	D	89	DM	0-7.6 cm	EquivSeg_Ammonium_N_kg_per_ha	3.39141
2012-02-01	89	E	89	DM + A	0-7.6 cm	EquivSeg_Ammonium_N_kg_per_ha	2.87197
2012-02-01	85	A	85	DM + A	7.6-15 cm	EquivSeg_Ammonium_N_kg_per_ha	5.44518
2012-02-01	85	B	85	DM	7.6-15 cm	EquivSeg_Ammonium_N_kg_per_ha	7.61158
2012-02-01	85	C	85	Urea	7.6-15 cm	EquivSeg_Ammonium_N_kg_per_ha	5.46575
2012-02-01	85	D	85	SU	7.6-15 cm	EquivSeg_Ammonium_N_kg_per_ha	7.94613
2012-02-01	85	E	85	Control	7.6-15 cm	EquivSeg_Ammonium_N_kg_per_ha	8.03993
2012-02-01	86	A	86	DM	7.6-15 cm	EquivSeg_Ammonium_N_kg_per_ha	6.58855
2012-02-01	86	B	86	DM + A	7.6-15 cm	EquivSeg_Ammonium_N_kg_per_ha	4.68152
2012-02-01	86	C	86	SU	7.6-15 cm	EquivSeg_Ammonium_N_kg_per_ha	3.94416
2012-02-01	86	D	86	Urea	7.6-15 cm	EquivSeg_Ammonium_N_kg_per_ha	3.42968
2012-02-01	86	E	86	Control	7.6-15 cm	EquivSeg_Ammonium_N_kg_per_ha	2.82442
2012-02-01	88	A	88	SU	7.6-15 cm	EquivSeg_Ammonium_N_kg_per_ha	4.40645
2012-02-01	88	B	88	Urea	7.6-15 cm	EquivSeg_Ammonium_N_kg_per_ha	4.12903
2012-02-01	88	C	88	Control	7.6-15 cm	EquivSeg_Ammonium_N_kg_per_ha	3.27958
2012-02-01	88	D	88	DM + A	7.6-15 cm	EquivSeg_Ammonium_N_kg_per_ha	2.70176
2012-02-01	88	E	88	DM	7.6-15 cm	EquivSeg_Ammonium_N_kg_per_ha	3.17936
2012-02-01	89	A	89	Control	7.6-15 cm	EquivSeg_Ammonium_N_kg_per_ha	2.71257
2012-02-01	89	B	89	Urea	7.6-15 cm	EquivSeg_Ammonium_N_kg_per_ha	4.39665
2012-02-01	89	C	89	SU	7.6-15 cm	EquivSeg_Ammonium_N_kg_per_ha	4.20067
2012-02-01	89	D	89	DM	7.6-15 cm	EquivSeg_Ammonium_N_kg_per_ha	4.14925
2012-02-01	89	E	89	DM + A	7.6-15 cm	EquivSeg_Ammonium_N_kg_per_ha	3.46431
2012-02-01	85	A	85	DM + A	15-30 cm	EquivSeg_Ammonium_N_kg_per_ha	12.774
2012-02-01	85	B	85	DM	15-30 cm	EquivSeg_Ammonium_N_kg_per_ha	16.0618
2012-02-01	85	C	85	Urea	15-30 cm	EquivSeg_Ammonium_N_kg_per_ha	12.8464
2012-02-01	85	D	85	SU	15-30 cm	EquivSeg_Ammonium_N_kg_per_ha	14.0767
2012-02-01	85	E	85	Control	15-30 cm	EquivSeg_Ammonium_N_kg_per_ha	14.9215
2012-02-01	86	A	86	DM	15-30 cm	EquivSeg_Ammonium_N_kg_per_ha	11.6077
2012-02-01	86	B	86	DM + A	15-30 cm	EquivSeg_Ammonium_N_kg_per_ha	11.326
2012-02-01	86	C	86	SU	15-30 cm	EquivSeg_Ammonium_N_kg_per_ha	8.10892
2012-02-01	86	D	86	Urea	15-30 cm	EquivSeg_Ammonium_N_kg_per_ha	7.28485
2012-02-01	86	E	86	Control	15-30 cm	EquivSeg_Ammonium_N_kg_per_ha	7.08073
2012-02-01	88	A	88	SU	15-30 cm	EquivSeg_Ammonium_N_kg_per_ha	7.76778
2012-02-01	88	B	88	Urea	15-30 cm	EquivSeg_Ammonium_N_kg_per_ha	8.85301
2012-02-01	88	C	88	Control	15-30 cm	EquivSeg_Ammonium_N_kg_per_ha	7.26304
2012-02-01	88	D	88	DM + A	15-30 cm	EquivSeg_Ammonium_N_kg_per_ha	6.15458
2012-02-01	88	E	88	DM	15-30 cm	EquivSeg_Ammonium_N_kg_per_ha	7.31517
2012-02-01	89	A	89	Control	15-30 cm	EquivSeg_Ammonium_N_kg_per_ha	7.47882
2012-02-01	89	B	89	Urea	15-30 cm	EquivSeg_Ammonium_N_kg_per_ha	7.93052
2012-02-01	89	C	89	SU	15-30 cm	EquivSeg_Ammonium_N_kg_per_ha	11.9515
2012-02-01	89	D	89	DM	15-30 cm	EquivSeg_Ammonium_N_kg_per_ha	7.85333
2012-02-01	89	E	89	DM + A	15-30 cm	EquivSeg_Ammonium_N_kg_per_ha	7.85471
2012-02-01	85	A	85	DM + A	30-61 cm	EquivSeg_Ammonium_N_kg_per_ha	16.8413
2012-02-01	85	B	85	DM	30-61 cm	EquivSeg_Ammonium_N_kg_per_ha	16.8539
2012-02-01	85	C	85	Urea	30-61 cm	EquivSeg_Ammonium_N_kg_per_ha	15.8568
2012-02-01	85	D	85	SU	30-61 cm	EquivSeg_Ammonium_N_kg_per_ha	16.5548
2012-02-01	85	E	85	Control	30-61 cm	EquivSeg_Ammonium_N_kg_per_ha	21.951
2012-02-01	86	A	86	DM	30-61 cm	EquivSeg_Ammonium_N_kg_per_ha	22.2221
2012-02-01	86	B	86	DM + A	30-61 cm	EquivSeg_Ammonium_N_kg_per_ha	15.2374
2012-02-01	86	C	86	SU	30-61 cm	EquivSeg_Ammonium_N_kg_per_ha	14.1704
2012-02-01	86	D	86	Urea	30-61 cm	EquivSeg_Ammonium_N_kg_per_ha	9.60493
2012-02-01	86	E	86	Control	30-61 cm	EquivSeg_Ammonium_N_kg_per_ha	9.45007
2012-02-01	88	A	88	SU	30-61 cm	EquivSeg_Ammonium_N_kg_per_ha	17.2987
2012-02-01	88	B	88	Urea	30-61 cm	EquivSeg_Ammonium_N_kg_per_ha	11.9645
2012-02-01	88	C	88	Control	30-61 cm	EquivSeg_Ammonium_N_kg_per_ha	20.0134
2012-02-01	88	D	88	DM + A	30-61 cm	EquivSeg_Ammonium_N_kg_per_ha	8.75469
2012-02-01	88	E	88	DM	30-61 cm	EquivSeg_Ammonium_N_kg_per_ha	11.1955
2012-02-01	89	A	89	Control	30-61 cm	EquivSeg_Ammonium_N_kg_per_ha	10.2225
2012-02-01	89	B	89	Urea	30-61 cm	EquivSeg_Ammonium_N_kg_per_ha	14.8816
2012-02-01	89	C	89	SU	30-61 cm	EquivSeg_Ammonium_N_kg_per_ha	15.787
2012-02-01	89	D	89	DM	30-61 cm	EquivSeg_Ammonium_N_kg_per_ha	22.6044
2012-02-01	89	E	89	DM + A	30-61 cm	EquivSeg_Ammonium_N_kg_per_ha	15.7167
2012-02-01	85	A	85	DM + A	61-91 cm	EquivSeg_Ammonium_N_kg_per_ha	16.7386
2012-02-01	85	B	85	DM	61-91 cm	EquivSeg_Ammonium_N_kg_per_ha	17.2333
2012-02-01	85	C	85	Urea	61-91 cm	EquivSeg_Ammonium_N_kg_per_ha	16.1594
2012-02-01	85	D	85	SU	61-91 cm	EquivSeg_Ammonium_N_kg_per_ha	18.8568
2012-02-01	85	E	85	Control	61-91 cm	EquivSeg_Ammonium_N_kg_per_ha	21.2838
2012-02-01	86	A	86	DM	61-91 cm	EquivSeg_Ammonium_N_kg_per_ha	13.7828
2012-02-01	86	B	86	DM + A	61-91 cm	EquivSeg_Ammonium_N_kg_per_ha	19.5064
2012-02-01	86	C	86	SU	61-91 cm	EquivSeg_Ammonium_N_kg_per_ha	10.8245
2012-02-01	86	D	86	Urea	61-91 cm	EquivSeg_Ammonium_N_kg_per_ha	11.0166
2012-02-01	86	E	86	Control	61-91 cm	EquivSeg_Ammonium_N_kg_per_ha	14.0283
2012-02-01	88	A	88	SU	61-91 cm	EquivSeg_Ammonium_N_kg_per_ha	14.4953
2012-02-01	88	B	88	Urea	61-91 cm	EquivSeg_Ammonium_N_kg_per_ha	13.2289
2012-02-01	88	C	88	Control	61-91 cm	EquivSeg_Ammonium_N_kg_per_ha	17.6262
2012-02-01	88	D	88	DM + A	61-91 cm	EquivSeg_Ammonium_N_kg_per_ha	10.0931
2012-02-01	88	E	88	DM	61-91 cm	EquivSeg_Ammonium_N_kg_per_ha	13.8052
2012-02-01	89	A	89	Control	61-91 cm	EquivSeg_Ammonium_N_kg_per_ha	9.25098
2012-02-01	89	B	89	Urea	61-91 cm	EquivSeg_Ammonium_N_kg_per_ha	11.6264
2012-02-01	89	C	89	SU	61-91 cm	EquivSeg_Ammonium_N_kg_per_ha	19.7117
2012-02-01	89	D	89	DM	61-91 cm	EquivSeg_Ammonium_N_kg_per_ha	16.7542
2012-02-01	89	E	89	DM + A	61-91 cm	EquivSeg_Ammonium_N_kg_per_ha	13.099
2012-02-01	85	A	85	DM + A	91-120 cm	EquivSeg_Ammonium_N_kg_per_ha	16.5566
2012-02-01	85	B	85	DM	91-120 cm	EquivSeg_Ammonium_N_kg_per_ha	15.3658
2012-02-01	85	C	85	Urea	91-120 cm	EquivSeg_Ammonium_N_kg_per_ha	19.5189
2012-02-01	85	D	85	SU	91-120 cm	EquivSeg_Ammonium_N_kg_per_ha	17.8121
2012-02-01	85	E	85	Control	91-120 cm	EquivSeg_Ammonium_N_kg_per_ha	20.8834
2012-02-01	86	A	86	DM	91-120 cm	EquivSeg_Ammonium_N_kg_per_ha	16.3581
2012-02-01	86	B	86	DM + A	91-120 cm	EquivSeg_Ammonium_N_kg_per_ha	17.7409
2012-02-01	86	C	86	SU	91-120 cm	EquivSeg_Ammonium_N_kg_per_ha	16.6434
2012-02-01	86	D	86	Urea	91-120 cm	EquivSeg_Ammonium_N_kg_per_ha	15.3818
2012-02-01	86	E	86	Control	91-120 cm	EquivSeg_Ammonium_N_kg_per_ha	14.1192
2012-02-01	88	A	88	SU	91-120 cm	EquivSeg_Ammonium_N_kg_per_ha	14.2697
2012-02-01	88	B	88	Urea	91-120 cm	EquivSeg_Ammonium_N_kg_per_ha	14.2242
2012-02-01	88	C	88	Control	91-120 cm	EquivSeg_Ammonium_N_kg_per_ha	15.8788
2012-02-01	88	D	88	DM + A	91-120 cm	EquivSeg_Ammonium_N_kg_per_ha	12.5822
2012-02-01	88	E	88	DM	91-120 cm	EquivSeg_Ammonium_N_kg_per_ha	11.388
2012-02-01	89	A	89	Control	91-120 cm	EquivSeg_Ammonium_N_kg_per_ha	11.5568
2012-02-01	89	B	89	Urea	91-120 cm	EquivSeg_Ammonium_N_kg_per_ha	13.8401
2012-02-01	89	C	89	SU	91-120 cm	EquivSeg_Ammonium_N_kg_per_ha	20.059
2012-02-01	89	D	89	DM	91-120 cm	EquivSeg_Ammonium_N_kg_per_ha	18.8262
2012-02-01	89	E	89	DM + A	91-120 cm	EquivSeg_Ammonium_N_kg_per_ha	15.231
2012-02-01	85	A	85	DM + A	120-150 cm	EquivSeg_Ammonium_N_kg_per_ha	16.859
2012-02-01	85	B	85	DM	120-150 cm	EquivSeg_Ammonium_N_kg_per_ha	14.5423
2012-02-01	85	C	85	Urea	120-150 cm	EquivSeg_Ammonium_N_kg_per_ha	19.9876
2012-02-01	85	D	85	SU	120-150 cm	EquivSeg_Ammonium_N_kg_per_ha	18.8404
2012-02-01	85	E	85	Control	120-150 cm	EquivSeg_Ammonium_N_kg_per_ha	21.6521
2012-02-01	86	A	86	DM	120-150 cm	EquivSeg_Ammonium_N_kg_per_ha	16.8236
2012-02-01	86	B	86	DM + A	120-150 cm	EquivSeg_Ammonium_N_kg_per_ha	23.4425
2012-02-01	86	C	86	SU	120-150 cm	EquivSeg_Ammonium_N_kg_per_ha	14.5586
2012-02-01	86	D	86	Urea	120-150 cm	EquivSeg_Ammonium_N_kg_per_ha	16.8892
2012-02-01	86	E	86	Control	120-150 cm	EquivSeg_Ammonium_N_kg_per_ha	15.2715
2012-02-01	88	A	88	SU	120-150 cm	EquivSeg_Ammonium_N_kg_per_ha	14.8706
2012-02-01	88	B	88	Urea	120-150 cm	EquivSeg_Ammonium_N_kg_per_ha	13.1037
2012-02-01	88	C	88	Control	120-150 cm	EquivSeg_Ammonium_N_kg_per_ha	17.7337
2012-02-01	88	D	88	DM + A	120-150 cm	EquivSeg_Ammonium_N_kg_per_ha	11.46
2012-02-01	88	E	88	DM	120-150 cm	EquivSeg_Ammonium_N_kg_per_ha	13.3568
2012-02-01	89	A	89	Control	120-150 cm	EquivSeg_Ammonium_N_kg_per_ha	13.3846
2012-02-01	89	B	89	Urea	120-150 cm	EquivSeg_Ammonium_N_kg_per_ha	13.0758
2012-02-01	89	C	89	SU	120-150 cm	EquivSeg_Ammonium_N_kg_per_ha	14.9036
2012-02-01	89	D	89	DM	120-150 cm	EquivSeg_Ammonium_N_kg_per_ha	19.2026
2012-02-01	89	E	89	DM + A	120-150 cm	EquivSeg_Ammonium_N_kg_per_ha	16.2028
2012-02-01	85	A	85	DM + A	150-180 cm	EquivSeg_Ammonium_N_kg_per_ha	19.3953
2012-02-01	85	B	85	DM	150-180 cm	EquivSeg_Ammonium_N_kg_per_ha	21.631
2012-02-01	85	C	85	Urea	150-180 cm	EquivSeg_Ammonium_N_kg_per_ha	22.8006
2012-02-01	85	D	85	SU	150-180 cm	EquivSeg_Ammonium_N_kg_per_ha	23.466
2012-02-01	85	E	85	Control	150-180 cm	EquivSeg_Ammonium_N_kg_per_ha	32.296
2012-02-01	86	A	86	DM	150-180 cm	EquivSeg_Ammonium_N_kg_per_ha	20.091
2012-02-01	86	B	86	DM + A	150-180 cm	EquivSeg_Ammonium_N_kg_per_ha	24.3705
2012-02-01	86	C	86	SU	150-180 cm	EquivSeg_Ammonium_N_kg_per_ha	21.7382
2012-02-01	86	D	86	Urea	150-180 cm	EquivSeg_Ammonium_N_kg_per_ha	18.2798
2012-02-01	86	E	86	Control	150-180 cm	EquivSeg_Ammonium_N_kg_per_ha	26.2036
2012-02-01	88	A	88	SU	150-180 cm	EquivSeg_Ammonium_N_kg_per_ha	16.2241
2012-02-01	88	B	88	Urea	150-180 cm	EquivSeg_Ammonium_N_kg_per_ha	12.9628
2012-02-01	88	C	88	Control	150-180 cm	EquivSeg_Ammonium_N_kg_per_ha	21.7842
2012-02-01	88	D	88	DM + A	150-180 cm	EquivSeg_Ammonium_N_kg_per_ha	14.1268
2012-02-01	88	E	88	DM	150-180 cm	EquivSeg_Ammonium_N_kg_per_ha	15.1874
2012-02-01	89	A	89	Control	150-180 cm	EquivSeg_Ammonium_N_kg_per_ha	15.7047
2012-02-01	89	B	89	Urea	150-180 cm	EquivSeg_Ammonium_N_kg_per_ha	15.4738
2012-02-01	89	C	89	SU	150-180 cm	EquivSeg_Ammonium_N_kg_per_ha	18.7755
2012-02-01	89	D	89	DM	150-180 cm	EquivSeg_Ammonium_N_kg_per_ha	23.9364
2012-02-01	89	E	89	DM + A	150-180 cm	EquivSeg_Ammonium_N_kg_per_ha	26.3651
2012-11-16	85	A	85	DM + A	0-7.6 cm	EquivSeg_Ammonium_N_kg_per_ha	13.5718
2012-11-16	85	B	85	DM	0-7.6 cm	EquivSeg_Ammonium_N_kg_per_ha	9.01167
2012-11-16	85	C	85	Urea	0-7.6 cm	EquivSeg_Ammonium_N_kg_per_ha	7.23228
2012-11-16	85	D	85	SU	0-7.6 cm	EquivSeg_Ammonium_N_kg_per_ha	6.45936
2012-11-16	85	E	85	Control	0-7.6 cm	EquivSeg_Ammonium_N_kg_per_ha	7.20681
2012-11-16	86	A	86	DM	0-7.6 cm	EquivSeg_Ammonium_N_kg_per_ha	11.4405
2012-11-16	86	B	86	DM + A	0-7.6 cm	EquivSeg_Ammonium_N_kg_per_ha	10.1812
2012-11-16	86	C	86	SU	0-7.6 cm	EquivSeg_Ammonium_N_kg_per_ha	8.76661
2012-11-16	86	D	86	Urea	0-7.6 cm	EquivSeg_Ammonium_N_kg_per_ha	7.33092
2012-11-16	86	E	86	Control	0-7.6 cm	EquivSeg_Ammonium_N_kg_per_ha	9.44375
2012-11-16	88	A	88	SU	0-7.6 cm	EquivSeg_Ammonium_N_kg_per_ha	4.52739
2012-11-16	88	B	88	Urea	0-7.6 cm	EquivSeg_Ammonium_N_kg_per_ha	6.25346
2012-11-16	88	C	88	Control	0-7.6 cm	EquivSeg_Ammonium_N_kg_per_ha	8.16163
2012-11-16	88	D	88	DM + A	0-7.6 cm	EquivSeg_Ammonium_N_kg_per_ha	9.71684
2012-11-16	88	E	88	DM	0-7.6 cm	EquivSeg_Ammonium_N_kg_per_ha	7.68845
2012-11-16	89	A	89	Control	0-7.6 cm	EquivSeg_Ammonium_N_kg_per_ha	4.48703
2012-11-16	89	B	89	Urea	0-7.6 cm	EquivSeg_Ammonium_N_kg_per_ha	6.09358
2012-11-16	89	C	89	SU	0-7.6 cm	EquivSeg_Ammonium_N_kg_per_ha	5.39522
2012-11-16	89	D	89	DM	0-7.6 cm	EquivSeg_Ammonium_N_kg_per_ha	4.37598
2012-11-16	89	E	89	DM + A	0-7.6 cm	EquivSeg_Ammonium_N_kg_per_ha	5.59789
2012-11-16	85	A	85	DM + A	7.6-15 cm	EquivSeg_Ammonium_N_kg_per_ha	7.71995
2012-11-16	85	B	85	DM	7.6-15 cm	EquivSeg_Ammonium_N_kg_per_ha	5.87968
2012-11-16	85	C	85	Urea	7.6-15 cm	EquivSeg_Ammonium_N_kg_per_ha	7.11097
2012-11-16	85	D	85	SU	7.6-15 cm	EquivSeg_Ammonium_N_kg_per_ha	6.54017
2012-11-16	85	E	85	Control	7.6-15 cm	EquivSeg_Ammonium_N_kg_per_ha	7.38538
2012-11-16	86	A	86	DM	7.6-15 cm	EquivSeg_Ammonium_N_kg_per_ha	13.7677
2012-11-16	86	B	86	DM + A	7.6-15 cm	EquivSeg_Ammonium_N_kg_per_ha	15.0803
2012-11-16	86	C	86	SU	7.6-15 cm	EquivSeg_Ammonium_N_kg_per_ha	10.3855
2012-11-16	86	D	86	Urea	7.6-15 cm	EquivSeg_Ammonium_N_kg_per_ha	8.12677
2012-11-16	86	E	86	Control	7.6-15 cm	EquivSeg_Ammonium_N_kg_per_ha	12.3095
2012-11-16	88	A	88	SU	7.6-15 cm	EquivSeg_Ammonium_N_kg_per_ha	9.37175
2012-11-16	88	B	88	Urea	7.6-15 cm	EquivSeg_Ammonium_N_kg_per_ha	6.02443
2012-11-16	88	C	88	Control	7.6-15 cm	EquivSeg_Ammonium_N_kg_per_ha	8.33008
2012-11-16	88	D	88	DM + A	7.6-15 cm	EquivSeg_Ammonium_N_kg_per_ha	5.50367
2012-11-16	88	E	88	DM	7.6-15 cm	EquivSeg_Ammonium_N_kg_per_ha	7.84346
2012-11-16	89	A	89	Control	7.6-15 cm	EquivSeg_Ammonium_N_kg_per_ha	5.4112
2012-11-16	89	B	89	Urea	7.6-15 cm	EquivSeg_Ammonium_N_kg_per_ha	5.2196
2012-11-16	89	C	89	SU	7.6-15 cm	EquivSeg_Ammonium_N_kg_per_ha	5.13754
2012-11-16	89	D	89	DM	7.6-15 cm	EquivSeg_Ammonium_N_kg_per_ha	5.13594
2012-11-16	89	E	89	DM + A	7.6-15 cm	EquivSeg_Ammonium_N_kg_per_ha	5.09424
2012-11-16	85	A	85	DM + A	15-30 cm	EquivSeg_Ammonium_N_kg_per_ha	12.0903
2012-11-16	85	B	85	DM	15-30 cm	EquivSeg_Ammonium_N_kg_per_ha	14.8832
2012-11-16	85	C	85	Urea	15-30 cm	EquivSeg_Ammonium_N_kg_per_ha	14.3123
2012-11-16	85	D	85	SU	15-30 cm	EquivSeg_Ammonium_N_kg_per_ha	14.1011
2012-11-16	85	E	85	Control	15-30 cm	EquivSeg_Ammonium_N_kg_per_ha	17.4321
2012-11-16	86	A	86	DM	15-30 cm	EquivSeg_Ammonium_N_kg_per_ha	21.0147
2012-11-16	86	B	86	DM + A	15-30 cm	EquivSeg_Ammonium_N_kg_per_ha	16.1941
2012-11-16	86	C	86	SU	15-30 cm	EquivSeg_Ammonium_N_kg_per_ha	15.8543
2012-11-16	86	D	86	Urea	15-30 cm	EquivSeg_Ammonium_N_kg_per_ha	10.1215
2012-11-16	86	E	86	Control	15-30 cm	EquivSeg_Ammonium_N_kg_per_ha	16.1443
2012-11-16	88	A	88	SU	15-30 cm	EquivSeg_Ammonium_N_kg_per_ha	15.4464
2012-11-16	88	B	88	Urea	15-30 cm	EquivSeg_Ammonium_N_kg_per_ha	10.0383
2012-11-16	88	C	88	Control	15-30 cm	EquivSeg_Ammonium_N_kg_per_ha	21.8486
2012-11-16	88	D	88	DM + A	15-30 cm	EquivSeg_Ammonium_N_kg_per_ha	10.6659
2012-11-16	88	E	88	DM	15-30 cm	EquivSeg_Ammonium_N_kg_per_ha	14.4602
2012-11-16	89	A	89	Control	15-30 cm	EquivSeg_Ammonium_N_kg_per_ha	12.6992
2012-11-16	89	B	89	Urea	15-30 cm	EquivSeg_Ammonium_N_kg_per_ha	11.8767
2012-11-16	89	C	89	SU	15-30 cm	EquivSeg_Ammonium_N_kg_per_ha	12.7255
2012-11-16	89	D	89	DM	15-30 cm	EquivSeg_Ammonium_N_kg_per_ha	10.3656
2012-11-16	89	E	89	DM + A	15-30 cm	EquivSeg_Ammonium_N_kg_per_ha	11.537
2012-11-16	85	A	85	DM + A	30-61 cm	EquivSeg_Ammonium_N_kg_per_ha	33.8998
2012-11-16	85	B	85	DM	30-61 cm	EquivSeg_Ammonium_N_kg_per_ha	37.8538
2012-11-16	85	C	85	Urea	30-61 cm	EquivSeg_Ammonium_N_kg_per_ha	39.1792
2012-11-16	85	D	85	SU	30-61 cm	EquivSeg_Ammonium_N_kg_per_ha	54.6521
2012-11-16	85	E	85	Control	30-61 cm	EquivSeg_Ammonium_N_kg_per_ha	52.4617
2012-11-16	86	A	86	DM	30-61 cm	EquivSeg_Ammonium_N_kg_per_ha	51.1329
2012-11-16	86	B	86	DM + A	30-61 cm	EquivSeg_Ammonium_N_kg_per_ha	48.8531
2012-11-16	86	C	86	SU	30-61 cm	EquivSeg_Ammonium_N_kg_per_ha	49.4698
2012-11-16	86	D	86	Urea	30-61 cm	EquivSeg_Ammonium_N_kg_per_ha	36.0268
2012-11-16	86	E	86	Control	30-61 cm	EquivSeg_Ammonium_N_kg_per_ha	21.5144
2012-11-16	88	A	88	SU	30-61 cm	EquivSeg_Ammonium_N_kg_per_ha	34.9289
2012-11-16	88	B	88	Urea	30-61 cm	EquivSeg_Ammonium_N_kg_per_ha	20.1619
2012-11-16	88	C	88	Control	30-61 cm	EquivSeg_Ammonium_N_kg_per_ha	57.3276
2012-11-16	88	D	88	DM + A	30-61 cm	EquivSeg_Ammonium_N_kg_per_ha	57.7813
2012-11-16	88	E	88	DM	30-61 cm	EquivSeg_Ammonium_N_kg_per_ha	63.0201
2012-11-16	89	A	89	Control	30-61 cm	EquivSeg_Ammonium_N_kg_per_ha	73.4743
2012-11-16	89	B	89	Urea	30-61 cm	EquivSeg_Ammonium_N_kg_per_ha	16.793
2012-11-16	89	C	89	SU	30-61 cm	EquivSeg_Ammonium_N_kg_per_ha	39.8296
2012-11-16	89	D	89	DM	30-61 cm	EquivSeg_Ammonium_N_kg_per_ha	29.3194
2012-11-16	89	E	89	DM + A	30-61 cm	EquivSeg_Ammonium_N_kg_per_ha	28.5628
2012-11-16	85	A	85	DM + A	61-91 cm	EquivSeg_Ammonium_N_kg_per_ha	40.6423
2012-11-16	85	B	85	DM	61-91 cm	EquivSeg_Ammonium_N_kg_per_ha	47.0851
2012-11-16	85	C	85	Urea	61-91 cm	EquivSeg_Ammonium_N_kg_per_ha	30.3872
2012-11-16	85	D	85	SU	61-91 cm	EquivSeg_Ammonium_N_kg_per_ha	62.622
2012-11-16	85	E	85	Control	61-91 cm	EquivSeg_Ammonium_N_kg_per_ha	33.2435
2012-11-16	86	A	86	DM	61-91 cm	EquivSeg_Ammonium_N_kg_per_ha	38.1156
2012-11-16	86	B	86	DM + A	61-91 cm	EquivSeg_Ammonium_N_kg_per_ha	36.878
2012-11-16	86	C	86	SU	61-91 cm	EquivSeg_Ammonium_N_kg_per_ha	30.2317
2012-11-16	86	D	86	Urea	61-91 cm	EquivSeg_Ammonium_N_kg_per_ha	36.7023
2012-11-16	86	E	86	Control	61-91 cm	EquivSeg_Ammonium_N_kg_per_ha	37.5893
2012-11-16	88	A	88	SU	61-91 cm	EquivSeg_Ammonium_N_kg_per_ha	32.777
2012-11-16	88	B	88	Urea	61-91 cm	EquivSeg_Ammonium_N_kg_per_ha	28.2123
2012-11-16	88	C	88	Control	61-91 cm	EquivSeg_Ammonium_N_kg_per_ha	35.1829
2012-11-16	88	D	88	DM + A	61-91 cm	EquivSeg_Ammonium_N_kg_per_ha	34.9024
2012-11-16	88	E	88	DM	61-91 cm	EquivSeg_Ammonium_N_kg_per_ha	20.575
2012-11-16	89	A	89	Control	61-91 cm	EquivSeg_Ammonium_N_kg_per_ha	45.4942
2012-11-16	89	B	89	Urea	61-91 cm	EquivSeg_Ammonium_N_kg_per_ha	57.3116
2012-11-16	89	C	89	SU	61-91 cm	EquivSeg_Ammonium_N_kg_per_ha	36.5698
2012-11-16	89	D	89	DM	61-91 cm	EquivSeg_Ammonium_N_kg_per_ha	40.8035
2012-11-16	89	E	89	DM + A	61-91 cm	EquivSeg_Ammonium_N_kg_per_ha	32.1542
2012-11-16	85	A	85	DM + A	91-120 cm	EquivSeg_Ammonium_N_kg_per_ha	23.0481
2012-11-16	85	B	85	DM	91-120 cm	EquivSeg_Ammonium_N_kg_per_ha	19.2913
2012-11-16	85	C	85	Urea	91-120 cm	EquivSeg_Ammonium_N_kg_per_ha	43.5471
2012-11-16	85	D	85	SU	91-120 cm	EquivSeg_Ammonium_N_kg_per_ha	27.3413
2012-11-16	85	E	85	Control	91-120 cm	EquivSeg_Ammonium_N_kg_per_ha	50.749
2012-11-16	86	A	86	DM	91-120 cm	EquivSeg_Ammonium_N_kg_per_ha	33.0286
2012-11-16	86	B	86	DM + A	91-120 cm	EquivSeg_Ammonium_N_kg_per_ha	43.1686
2012-11-16	86	C	86	SU	91-120 cm	EquivSeg_Ammonium_N_kg_per_ha	45.2185
2012-11-16	86	D	86	Urea	91-120 cm	EquivSeg_Ammonium_N_kg_per_ha	33.843
2012-11-16	86	E	86	Control	91-120 cm	EquivSeg_Ammonium_N_kg_per_ha	19.619
2012-11-16	88	A	88	SU	91-120 cm	EquivSeg_Ammonium_N_kg_per_ha	28.5455
2012-11-16	88	B	88	Urea	91-120 cm	EquivSeg_Ammonium_N_kg_per_ha	23.1714
2012-11-16	88	C	88	Control	91-120 cm	EquivSeg_Ammonium_N_kg_per_ha	18.8365
2012-11-16	88	D	88	DM + A	91-120 cm	EquivSeg_Ammonium_N_kg_per_ha	41.7894
2012-11-16	88	E	88	DM	91-120 cm	EquivSeg_Ammonium_N_kg_per_ha	16.3362
2012-11-16	89	A	89	Control	91-120 cm	EquivSeg_Ammonium_N_kg_per_ha	34.8093
2012-11-16	89	B	89	Urea	91-120 cm	EquivSeg_Ammonium_N_kg_per_ha	51.04
2012-11-16	89	C	89	SU	91-120 cm	EquivSeg_Ammonium_N_kg_per_ha	32.9975
2012-11-16	89	D	89	DM	91-120 cm	EquivSeg_Ammonium_N_kg_per_ha	39.9024
2012-11-16	89	E	89	DM + A	91-120 cm	EquivSeg_Ammonium_N_kg_per_ha	24.4132
2012-11-16	85	A	85	DM + A	120-150 cm	EquivSeg_Ammonium_N_kg_per_ha	44.0913
2012-11-16	85	B	85	DM	120-150 cm	EquivSeg_Ammonium_N_kg_per_ha	40.3113
2012-11-16	85	C	85	Urea	120-150 cm	EquivSeg_Ammonium_N_kg_per_ha	44.027
2012-11-16	85	D	85	SU	120-150 cm	EquivSeg_Ammonium_N_kg_per_ha	43.231
2012-11-16	85	E	85	Control	120-150 cm	EquivSeg_Ammonium_N_kg_per_ha	44.5334
2012-11-16	86	A	86	DM	120-150 cm	EquivSeg_Ammonium_N_kg_per_ha	41.5267
2012-11-16	86	B	86	DM + A	120-150 cm	EquivSeg_Ammonium_N_kg_per_ha	32.6865
2012-11-16	86	C	86	SU	120-150 cm	EquivSeg_Ammonium_N_kg_per_ha	38.1459
2012-11-16	86	D	86	Urea	120-150 cm	EquivSeg_Ammonium_N_kg_per_ha	39.5541
2012-11-16	86	E	86	Control	120-150 cm	EquivSeg_Ammonium_N_kg_per_ha	32.4227
2012-11-16	88	A	88	SU	120-150 cm	EquivSeg_Ammonium_N_kg_per_ha	22.8835
2012-11-16	88	B	88	Urea	120-150 cm	EquivSeg_Ammonium_N_kg_per_ha	39.0053
2012-11-16	88	C	88	Control	120-150 cm	EquivSeg_Ammonium_N_kg_per_ha	30.5804
2012-11-16	88	D	88	DM + A	120-150 cm	EquivSeg_Ammonium_N_kg_per_ha	34.5369
2012-11-16	88	E	88	DM	120-150 cm	EquivSeg_Ammonium_N_kg_per_ha	22.0943
2012-11-16	89	A	89	Control	120-150 cm	EquivSeg_Ammonium_N_kg_per_ha	42.8277
2012-11-16	89	B	89	Urea	120-150 cm	EquivSeg_Ammonium_N_kg_per_ha	46.5417
2012-11-16	89	C	89	SU	120-150 cm	EquivSeg_Ammonium_N_kg_per_ha	53.7089
2012-11-16	89	D	89	DM	120-150 cm	EquivSeg_Ammonium_N_kg_per_ha	37.4302
2012-11-16	89	E	89	DM + A	120-150 cm	EquivSeg_Ammonium_N_kg_per_ha	25.3238
2012-11-16	85	A	85	DM + A	150-180 cm	EquivSeg_Ammonium_N_kg_per_ha	38.7907
2012-11-16	85	B	85	DM	150-180 cm	EquivSeg_Ammonium_N_kg_per_ha	61.7566
2012-11-16	85	C	85	Urea	150-180 cm	EquivSeg_Ammonium_N_kg_per_ha	54.6768
2012-11-16	85	D	85	SU	150-180 cm	EquivSeg_Ammonium_N_kg_per_ha	50.1522
2012-11-16	85	E	85	Control	150-180 cm	EquivSeg_Ammonium_N_kg_per_ha	55.3011
2012-11-16	86	A	86	DM	150-180 cm	EquivSeg_Ammonium_N_kg_per_ha	43.8237
2012-11-16	86	B	86	DM + A	150-180 cm	EquivSeg_Ammonium_N_kg_per_ha	37.6312
2012-11-16	86	C	86	SU	150-180 cm	EquivSeg_Ammonium_N_kg_per_ha	40.7329
2012-11-16	86	D	86	Urea	150-180 cm	EquivSeg_Ammonium_N_kg_per_ha	68.2962
2012-11-16	86	E	86	Control	150-180 cm	EquivSeg_Ammonium_N_kg_per_ha	27.7986
2012-11-16	88	A	88	SU	150-180 cm	EquivSeg_Ammonium_N_kg_per_ha	49.3105
2012-11-16	88	B	88	Urea	150-180 cm	EquivSeg_Ammonium_N_kg_per_ha	27.6447
2012-11-16	88	C	88	Control	150-180 cm	EquivSeg_Ammonium_N_kg_per_ha	51.7448
2012-11-16	88	D	88	DM + A	150-180 cm	EquivSeg_Ammonium_N_kg_per_ha	25.62
2012-11-16	88	E	88	DM	150-180 cm	EquivSeg_Ammonium_N_kg_per_ha	72.9442
2012-11-16	89	A	89	Control	150-180 cm	EquivSeg_Ammonium_N_kg_per_ha	41.9344
2012-11-16	89	B	89	Urea	150-180 cm	EquivSeg_Ammonium_N_kg_per_ha	46.1717
2012-11-16	89	C	89	SU	150-180 cm	EquivSeg_Ammonium_N_kg_per_ha	25.9771
2012-11-16	89	D	89	DM	150-180 cm	EquivSeg_Ammonium_N_kg_per_ha	37.0348
2012-11-16	89	E	89	DM + A	150-180 cm	EquivSeg_Ammonium_N_kg_per_ha	35.8058
2013-11-08	85	A	85	DM + A	0-7.6 cm	EquivSeg_Ammonium_N_kg_per_ha	5.242
2013-11-08	85	B	85	DM	0-7.6 cm	EquivSeg_Ammonium_N_kg_per_ha	4.97106
2013-11-08	85	C	85	Urea	0-7.6 cm	EquivSeg_Ammonium_N_kg_per_ha	8.79509
2013-11-08	85	D	85	SU	0-7.6 cm	EquivSeg_Ammonium_N_kg_per_ha	3.798
2013-11-08	85	E	85	Control	0-7.6 cm	EquivSeg_Ammonium_N_kg_per_ha	4.23943
2013-11-08	86	A	86	DM	0-7.6 cm	EquivSeg_Ammonium_N_kg_per_ha	4.43218
2013-11-08	86	B	86	DM + A	0-7.6 cm	EquivSeg_Ammonium_N_kg_per_ha	6.60169
2013-11-08	86	C	86	SU	0-7.6 cm	EquivSeg_Ammonium_N_kg_per_ha	5.39744
2013-11-08	86	D	86	Urea	0-7.6 cm	EquivSeg_Ammonium_N_kg_per_ha	7.22568
2013-11-08	86	E	86	Control	0-7.6 cm	EquivSeg_Ammonium_N_kg_per_ha	3.9116
2013-11-08	88	A	88	SU	0-7.6 cm	EquivSeg_Ammonium_N_kg_per_ha	4.95115
2013-11-08	88	B	88	Urea	0-7.6 cm	EquivSeg_Ammonium_N_kg_per_ha	7.64102
2013-11-08	88	C	88	Control	0-7.6 cm	EquivSeg_Ammonium_N_kg_per_ha	4.74867
2013-11-08	88	D	88	DM + A	0-7.6 cm	EquivSeg_Ammonium_N_kg_per_ha	4.39551
2013-11-08	88	E	88	DM	0-7.6 cm	EquivSeg_Ammonium_N_kg_per_ha	6.97522
2013-11-08	89	A	89	Control	0-7.6 cm	EquivSeg_Ammonium_N_kg_per_ha	4.08539
2013-11-08	89	B	89	Urea	0-7.6 cm	EquivSeg_Ammonium_N_kg_per_ha	3.85462
2013-11-08	89	C	89	SU	0-7.6 cm	EquivSeg_Ammonium_N_kg_per_ha	5.69722
2013-11-08	89	D	89	DM	0-7.6 cm	EquivSeg_Ammonium_N_kg_per_ha	5.5725
2013-11-08	89	E	89	DM + A	0-7.6 cm	EquivSeg_Ammonium_N_kg_per_ha	4.48372
2013-11-08	85	A	85	DM + A	7.6-15 cm	EquivSeg_Ammonium_N_kg_per_ha	6.63358
2013-11-08	85	B	85	DM	7.6-15 cm	EquivSeg_Ammonium_N_kg_per_ha	4.4515
2013-11-08	85	C	85	Urea	7.6-15 cm	EquivSeg_Ammonium_N_kg_per_ha	7.84504
2013-11-08	85	D	85	SU	7.6-15 cm	EquivSeg_Ammonium_N_kg_per_ha	4.811
2013-11-08	85	E	85	Control	7.6-15 cm	EquivSeg_Ammonium_N_kg_per_ha	4.57915
2013-11-08	86	A	86	DM	7.6-15 cm	EquivSeg_Ammonium_N_kg_per_ha	5.34409
2013-11-08	86	B	86	DM + A	7.6-15 cm	EquivSeg_Ammonium_N_kg_per_ha	6.48061
2013-11-08	86	C	86	SU	7.6-15 cm	EquivSeg_Ammonium_N_kg_per_ha	4.39678
2013-11-08	86	D	86	Urea	7.6-15 cm	EquivSeg_Ammonium_N_kg_per_ha	5.41379
2013-11-08	86	E	86	Control	7.6-15 cm	EquivSeg_Ammonium_N_kg_per_ha	5.26303
2013-11-08	88	A	88	SU	7.6-15 cm	EquivSeg_Ammonium_N_kg_per_ha	4.67572
2013-11-08	88	B	88	Urea	7.6-15 cm	EquivSeg_Ammonium_N_kg_per_ha	5.42375
2013-11-08	88	C	88	Control	7.6-15 cm	EquivSeg_Ammonium_N_kg_per_ha	5.90801
2013-11-08	88	D	88	DM + A	7.6-15 cm	EquivSeg_Ammonium_N_kg_per_ha	4.34085
2013-11-08	88	E	88	DM	7.6-15 cm	EquivSeg_Ammonium_N_kg_per_ha	5.49372
2013-11-08	89	A	89	Control	7.6-15 cm	EquivSeg_Ammonium_N_kg_per_ha	5.97863
2013-11-08	89	B	89	Urea	7.6-15 cm	EquivSeg_Ammonium_N_kg_per_ha	4.97031
2013-11-08	89	C	89	SU	7.6-15 cm	EquivSeg_Ammonium_N_kg_per_ha	5.55112
2013-11-08	89	D	89	DM	7.6-15 cm	EquivSeg_Ammonium_N_kg_per_ha	4.89141
2013-11-08	89	E	89	DM + A	7.6-15 cm	EquivSeg_Ammonium_N_kg_per_ha	3.38447
2013-11-08	85	A	85	DM + A	15-30 cm	EquivSeg_Ammonium_N_kg_per_ha	15.4661
2013-11-08	85	B	85	DM	15-30 cm	EquivSeg_Ammonium_N_kg_per_ha	10.2336
2013-11-08	85	C	85	Urea	15-30 cm	EquivSeg_Ammonium_N_kg_per_ha	10.9262
2013-11-08	85	D	85	SU	15-30 cm	EquivSeg_Ammonium_N_kg_per_ha	14.2521
2013-11-08	85	E	85	Control	15-30 cm	EquivSeg_Ammonium_N_kg_per_ha	11.8987
2013-11-08	86	A	86	DM	15-30 cm	EquivSeg_Ammonium_N_kg_per_ha	11.4685
2013-11-08	86	B	86	DM + A	15-30 cm	EquivSeg_Ammonium_N_kg_per_ha	9.86365
2013-11-08	86	C	86	SU	15-30 cm	EquivSeg_Ammonium_N_kg_per_ha	9.58133
2013-11-08	86	D	86	Urea	15-30 cm	EquivSeg_Ammonium_N_kg_per_ha	11.6453
2013-11-08	86	E	86	Control	15-30 cm	EquivSeg_Ammonium_N_kg_per_ha	11.4245
2013-11-08	88	A	88	SU	15-30 cm	EquivSeg_Ammonium_N_kg_per_ha	10.5759
2013-11-08	88	B	88	Urea	15-30 cm	EquivSeg_Ammonium_N_kg_per_ha	11.3656
2013-11-08	88	C	88	Control	15-30 cm	EquivSeg_Ammonium_N_kg_per_ha	11.625
2013-11-08	88	D	88	DM + A	15-30 cm	EquivSeg_Ammonium_N_kg_per_ha	8.85474
2013-11-08	88	E	88	DM	15-30 cm	EquivSeg_Ammonium_N_kg_per_ha	16.6266
2013-11-08	89	A	89	Control	15-30 cm	EquivSeg_Ammonium_N_kg_per_ha	11.9778
2013-11-08	89	B	89	Urea	15-30 cm	EquivSeg_Ammonium_N_kg_per_ha	12.233
2013-11-08	89	C	89	SU	15-30 cm	EquivSeg_Ammonium_N_kg_per_ha	10.474
2013-11-08	89	D	89	DM	15-30 cm	EquivSeg_Ammonium_N_kg_per_ha	11.0346
2013-11-08	89	E	89	DM + A	15-30 cm	EquivSeg_Ammonium_N_kg_per_ha	9.03873
2013-11-08	85	A	85	DM + A	30-61 cm	EquivSeg_Ammonium_N_kg_per_ha	23.618
2013-11-08	85	B	85	DM	30-61 cm	EquivSeg_Ammonium_N_kg_per_ha	18.8203
2013-11-08	85	C	85	Urea	30-61 cm	EquivSeg_Ammonium_N_kg_per_ha	12.4499
2013-11-08	85	D	85	SU	30-61 cm	EquivSeg_Ammonium_N_kg_per_ha	11.4179
2013-11-08	85	E	85	Control	30-61 cm	EquivSeg_Ammonium_N_kg_per_ha	21.277
2013-11-08	86	A	86	DM	30-61 cm	EquivSeg_Ammonium_N_kg_per_ha	18.7158
2013-11-08	86	B	86	DM + A	30-61 cm	EquivSeg_Ammonium_N_kg_per_ha	15.6435
2013-11-08	86	C	86	SU	30-61 cm	EquivSeg_Ammonium_N_kg_per_ha	15.1394
2013-11-08	86	D	86	Urea	30-61 cm	EquivSeg_Ammonium_N_kg_per_ha	16.2317
2013-11-08	86	E	86	Control	30-61 cm	EquivSeg_Ammonium_N_kg_per_ha	15.0853
2013-11-08	88	A	88	SU	30-61 cm	EquivSeg_Ammonium_N_kg_per_ha	18.0941
2013-11-08	88	B	88	Urea	30-61 cm	EquivSeg_Ammonium_N_kg_per_ha	18.3492
2013-11-08	88	C	88	Control	30-61 cm	EquivSeg_Ammonium_N_kg_per_ha	16.7684
2013-11-08	88	D	88	DM + A	30-61 cm	EquivSeg_Ammonium_N_kg_per_ha	17.6914
2013-11-08	88	E	88	DM	30-61 cm	EquivSeg_Ammonium_N_kg_per_ha	18.3298
2013-11-08	89	A	89	Control	30-61 cm	EquivSeg_Ammonium_N_kg_per_ha	14.6278
2013-11-08	89	B	89	Urea	30-61 cm	EquivSeg_Ammonium_N_kg_per_ha	16.52
2013-11-08	89	C	89	SU	30-61 cm	EquivSeg_Ammonium_N_kg_per_ha	17.4896
2013-11-08	89	D	89	DM	30-61 cm	EquivSeg_Ammonium_N_kg_per_ha	12.9404
2013-11-08	89	E	89	DM + A	30-61 cm	EquivSeg_Ammonium_N_kg_per_ha	12.7607
2013-11-08	85	A	85	DM + A	61-91 cm	EquivSeg_Ammonium_N_kg_per_ha	16.8596
2013-11-08	85	B	85	DM	61-91 cm	EquivSeg_Ammonium_N_kg_per_ha	17.775
2013-11-08	85	C	85	Urea	61-91 cm	EquivSeg_Ammonium_N_kg_per_ha	17.1941
2013-11-08	85	D	85	SU	61-91 cm	EquivSeg_Ammonium_N_kg_per_ha	15.6848
2013-11-08	85	E	85	Control	61-91 cm	EquivSeg_Ammonium_N_kg_per_ha	16.5444
2013-11-08	86	A	86	DM	61-91 cm	EquivSeg_Ammonium_N_kg_per_ha	18.7108
2013-11-08	86	B	86	DM + A	61-91 cm	EquivSeg_Ammonium_N_kg_per_ha	16.354
2013-11-08	86	C	86	SU	61-91 cm	EquivSeg_Ammonium_N_kg_per_ha	14.4817
2013-11-08	86	D	86	Urea	61-91 cm	EquivSeg_Ammonium_N_kg_per_ha	19.4251
2013-11-08	86	E	86	Control	61-91 cm	EquivSeg_Ammonium_N_kg_per_ha	14.9022
2013-11-08	88	A	88	SU	61-91 cm	EquivSeg_Ammonium_N_kg_per_ha	19.0715
2013-11-08	88	B	88	Urea	61-91 cm	EquivSeg_Ammonium_N_kg_per_ha	21.0449
2013-11-08	88	C	88	Control	61-91 cm	EquivSeg_Ammonium_N_kg_per_ha	23.4265
2013-11-08	88	D	88	DM + A	61-91 cm	EquivSeg_Ammonium_N_kg_per_ha	18.2426
2013-11-08	88	E	88	DM	61-91 cm	EquivSeg_Ammonium_N_kg_per_ha	16.9771
2013-11-08	89	A	89	Control	61-91 cm	EquivSeg_Ammonium_N_kg_per_ha	17.5195
2013-11-08	89	B	89	Urea	61-91 cm	EquivSeg_Ammonium_N_kg_per_ha	17.9582
2013-11-08	89	C	89	SU	61-91 cm	EquivSeg_Ammonium_N_kg_per_ha	11.5784
2013-11-08	89	D	89	DM	61-91 cm	EquivSeg_Ammonium_N_kg_per_ha	14.8691
2013-11-08	89	E	89	DM + A	61-91 cm	EquivSeg_Ammonium_N_kg_per_ha	11.0637
2013-11-08	85	A	85	DM + A	91-120 cm	EquivSeg_Ammonium_N_kg_per_ha	17.8433
2013-11-08	85	B	85	DM	91-120 cm	EquivSeg_Ammonium_N_kg_per_ha	17.8187
2013-11-08	85	C	85	Urea	91-120 cm	EquivSeg_Ammonium_N_kg_per_ha	14.6322
2013-11-08	85	D	85	SU	91-120 cm	EquivSeg_Ammonium_N_kg_per_ha	14.7746
2013-11-08	85	E	85	Control	91-120 cm	EquivSeg_Ammonium_N_kg_per_ha	13.7948
2013-11-08	86	A	86	DM	91-120 cm	EquivSeg_Ammonium_N_kg_per_ha	15.1657
2013-11-08	86	B	86	DM + A	91-120 cm	EquivSeg_Ammonium_N_kg_per_ha	13.9362
2013-11-08	86	C	86	SU	91-120 cm	EquivSeg_Ammonium_N_kg_per_ha	13.5966
2013-11-08	86	D	86	Urea	91-120 cm	EquivSeg_Ammonium_N_kg_per_ha	14.6477
2013-11-08	86	E	86	Control	91-120 cm	EquivSeg_Ammonium_N_kg_per_ha	12.8215
2013-11-08	88	A	88	SU	91-120 cm	EquivSeg_Ammonium_N_kg_per_ha	13.3921
2013-11-08	88	B	88	Urea	91-120 cm	EquivSeg_Ammonium_N_kg_per_ha	16.4753
2013-11-08	88	C	88	Control	91-120 cm	EquivSeg_Ammonium_N_kg_per_ha	13.8653
2013-11-08	88	D	88	DM + A	91-120 cm	EquivSeg_Ammonium_N_kg_per_ha	16.681
2013-11-08	88	E	88	DM	91-120 cm	EquivSeg_Ammonium_N_kg_per_ha	12.7461
2013-11-08	89	A	89	Control	91-120 cm	EquivSeg_Ammonium_N_kg_per_ha	16.6496
2013-11-08	89	B	89	Urea	91-120 cm	EquivSeg_Ammonium_N_kg_per_ha	24.192
2013-11-08	89	C	89	SU	91-120 cm	EquivSeg_Ammonium_N_kg_per_ha	13.2848
2013-11-08	89	D	89	DM	91-120 cm	EquivSeg_Ammonium_N_kg_per_ha	13.0371
2013-11-08	89	E	89	DM + A	91-120 cm	EquivSeg_Ammonium_N_kg_per_ha	13.8843
2013-11-08	85	A	85	DM + A	120-150 cm	EquivSeg_Ammonium_N_kg_per_ha	19.242
2013-11-08	85	B	85	DM	120-150 cm	EquivSeg_Ammonium_N_kg_per_ha	21.0288
2013-11-08	85	C	85	Urea	120-150 cm	EquivSeg_Ammonium_N_kg_per_ha	21.5056
2013-11-08	85	D	85	SU	120-150 cm	EquivSeg_Ammonium_N_kg_per_ha	19.6452
2013-11-08	85	E	85	Control	120-150 cm	EquivSeg_Ammonium_N_kg_per_ha	19.8956
2013-11-08	86	A	86	DM	120-150 cm	EquivSeg_Ammonium_N_kg_per_ha	18.0598
2013-11-08	86	B	86	DM + A	120-150 cm	EquivSeg_Ammonium_N_kg_per_ha	15.9838
2013-11-08	86	C	86	SU	120-150 cm	EquivSeg_Ammonium_N_kg_per_ha	19.0367
2013-11-08	86	D	86	Urea	120-150 cm	EquivSeg_Ammonium_N_kg_per_ha	15.8325
2013-11-08	86	E	86	Control	120-150 cm	EquivSeg_Ammonium_N_kg_per_ha	19.4975
2013-11-08	88	A	88	SU	120-150 cm	EquivSeg_Ammonium_N_kg_per_ha	22.8098
2013-11-08	88	B	88	Urea	120-150 cm	EquivSeg_Ammonium_N_kg_per_ha	19.0585
2013-11-08	88	C	88	Control	120-150 cm	EquivSeg_Ammonium_N_kg_per_ha	18.5586
2013-11-08	88	D	88	DM + A	120-150 cm	EquivSeg_Ammonium_N_kg_per_ha	18.5032
2013-11-08	88	E	88	DM	120-150 cm	EquivSeg_Ammonium_N_kg_per_ha	14.6351
2013-11-08	89	A	89	Control	120-150 cm	EquivSeg_Ammonium_N_kg_per_ha	17.6729
2013-11-08	89	B	89	Urea	120-150 cm	EquivSeg_Ammonium_N_kg_per_ha	15.6193
2013-11-08	89	C	89	SU	120-150 cm	EquivSeg_Ammonium_N_kg_per_ha	13.2635
2013-11-08	89	D	89	DM	120-150 cm	EquivSeg_Ammonium_N_kg_per_ha	16.8162
2013-11-08	89	E	89	DM + A	120-150 cm	EquivSeg_Ammonium_N_kg_per_ha	13.7176
2013-11-08	85	A	85	DM + A	150-180 cm	EquivSeg_Ammonium_N_kg_per_ha	19.2373
2013-11-08	85	B	85	DM	150-180 cm	EquivSeg_Ammonium_N_kg_per_ha	25.4651
2013-11-08	85	C	85	Urea	150-180 cm	EquivSeg_Ammonium_N_kg_per_ha	20.0346
2013-11-08	85	D	85	SU	150-180 cm	EquivSeg_Ammonium_N_kg_per_ha	19.314
2013-11-08	85	E	85	Control	150-180 cm	EquivSeg_Ammonium_N_kg_per_ha	18.5826
2013-11-08	86	A	86	DM	150-180 cm	EquivSeg_Ammonium_N_kg_per_ha	20.7729
2013-11-08	86	B	86	DM + A	150-180 cm	EquivSeg_Ammonium_N_kg_per_ha	23.1021
2013-11-08	86	C	86	SU	150-180 cm	EquivSeg_Ammonium_N_kg_per_ha	19.9161
2013-11-08	86	D	86	Urea	150-180 cm	EquivSeg_Ammonium_N_kg_per_ha	18.2734
2013-11-08	86	E	86	Control	150-180 cm	EquivSeg_Ammonium_N_kg_per_ha	20.2779
2013-11-08	88	A	88	SU	150-180 cm	EquivSeg_Ammonium_N_kg_per_ha	21.4111
2013-11-08	88	B	88	Urea	150-180 cm	EquivSeg_Ammonium_N_kg_per_ha	25.8722
2013-11-08	88	C	88	Control	150-180 cm	EquivSeg_Ammonium_N_kg_per_ha	18.1175
2013-11-08	88	D	88	DM + A	150-180 cm	EquivSeg_Ammonium_N_kg_per_ha	19.9777
2013-11-08	88	E	88	DM	150-180 cm	EquivSeg_Ammonium_N_kg_per_ha	20.4378
2013-11-08	89	A	89	Control	150-180 cm	EquivSeg_Ammonium_N_kg_per_ha	22.1067
2013-11-08	89	B	89	Urea	150-180 cm	EquivSeg_Ammonium_N_kg_per_ha	15.7003
2013-11-08	89	C	89	SU	150-180 cm	EquivSeg_Ammonium_N_kg_per_ha	21.2385
2013-11-08	89	D	89	DM	150-180 cm	EquivSeg_Ammonium_N_kg_per_ha	18.5488
2013-11-08	89	E	89	DM + A	150-180 cm	EquivSeg_Ammonium_N_kg_per_ha	17.1591
2015-11-24	85	A	85	DM + A	0-7.6 cm	EquivSeg_Ammonium_N_kg_per_ha	6.48099
2015-11-24	85	B	85	DM	0-7.6 cm	EquivSeg_Ammonium_N_kg_per_ha	6.13668
2015-11-24	85	C	85	Urea	0-7.6 cm	EquivSeg_Ammonium_N_kg_per_ha	5.06189
2015-11-24	85	D	85	SU	0-7.6 cm	EquivSeg_Ammonium_N_kg_per_ha	6.45453
2015-11-24	85	E	85	Control	0-7.6 cm	EquivSeg_Ammonium_N_kg_per_ha	5.84177
2015-11-24	86	A	86	DM	0-7.6 cm	EquivSeg_Ammonium_N_kg_per_ha	6.10535
2015-11-24	86	B	86	DM + A	0-7.6 cm	EquivSeg_Ammonium_N_kg_per_ha	7.22892
2015-11-24	86	C	86	SU	0-7.6 cm	EquivSeg_Ammonium_N_kg_per_ha	5.55068
2015-11-24	86	D	86	Urea	0-7.6 cm	EquivSeg_Ammonium_N_kg_per_ha	6.00512
2015-11-24	86	E	86	Control	0-7.6 cm	EquivSeg_Ammonium_N_kg_per_ha	6.11425
2015-11-24	88	A	88	SU	0-7.6 cm	EquivSeg_Ammonium_N_kg_per_ha	11.6118
2015-11-24	88	B	88	Urea	0-7.6 cm	EquivSeg_Ammonium_N_kg_per_ha	11.846
2015-11-24	88	C	88	Control	0-7.6 cm	EquivSeg_Ammonium_N_kg_per_ha	10.3535
2015-11-24	88	D	88	DM + A	0-7.6 cm	EquivSeg_Ammonium_N_kg_per_ha	8.67424
2015-11-24	88	E	88	DM	0-7.6 cm	EquivSeg_Ammonium_N_kg_per_ha	8.61807
2015-11-24	89	A	89	Control	0-7.6 cm	EquivSeg_Ammonium_N_kg_per_ha	12.676
2015-11-24	89	B	89	Urea	0-7.6 cm	EquivSeg_Ammonium_N_kg_per_ha	10.7148
2015-11-24	89	C	89	SU	0-7.6 cm	EquivSeg_Ammonium_N_kg_per_ha	14.2878
2015-11-24	89	D	89	DM	0-7.6 cm	EquivSeg_Ammonium_N_kg_per_ha	10.8902
2015-11-24	89	E	89	DM + A	0-7.6 cm	EquivSeg_Ammonium_N_kg_per_ha	16.1693
2015-11-24	85	A	85	DM + A	7.6-15 cm	EquivSeg_Ammonium_N_kg_per_ha	6.19281
2015-11-24	85	B	85	DM	7.6-15 cm	EquivSeg_Ammonium_N_kg_per_ha	5.67543
2015-11-24	85	C	85	Urea	7.6-15 cm	EquivSeg_Ammonium_N_kg_per_ha	6.07823
2015-11-24	85	D	85	SU	7.6-15 cm	EquivSeg_Ammonium_N_kg_per_ha	5.78714
2015-11-24	85	E	85	Control	7.6-15 cm	EquivSeg_Ammonium_N_kg_per_ha	5.28331
2015-11-24	86	A	86	DM	7.6-15 cm	EquivSeg_Ammonium_N_kg_per_ha	6.76306
2015-11-24	86	B	86	DM + A	7.6-15 cm	EquivSeg_Ammonium_N_kg_per_ha	5.69445
2015-11-24	86	C	86	SU	7.6-15 cm	EquivSeg_Ammonium_N_kg_per_ha	6.07374
2015-11-24	86	D	86	Urea	7.6-15 cm	EquivSeg_Ammonium_N_kg_per_ha	6.7011
2015-11-24	86	E	86	Control	7.6-15 cm	EquivSeg_Ammonium_N_kg_per_ha	7.52855
2015-11-24	88	A	88	SU	7.6-15 cm	EquivSeg_Ammonium_N_kg_per_ha	12.4054
2015-11-24	88	B	88	Urea	7.6-15 cm	EquivSeg_Ammonium_N_kg_per_ha	12.88
2015-11-24	88	C	88	Control	7.6-15 cm	EquivSeg_Ammonium_N_kg_per_ha	11.2588
2015-11-24	88	D	88	DM + A	7.6-15 cm	EquivSeg_Ammonium_N_kg_per_ha	12.4244
2015-11-24	88	E	88	DM	7.6-15 cm	EquivSeg_Ammonium_N_kg_per_ha	10.961
2015-11-24	89	A	89	Control	7.6-15 cm	EquivSeg_Ammonium_N_kg_per_ha	12.7388
2015-11-24	89	B	89	Urea	7.6-15 cm	EquivSeg_Ammonium_N_kg_per_ha	10.9375
2015-11-24	89	C	89	SU	7.6-15 cm	EquivSeg_Ammonium_N_kg_per_ha	13.7864
2015-11-24	89	D	89	DM	7.6-15 cm	EquivSeg_Ammonium_N_kg_per_ha	12.1725
2015-11-24	89	E	89	DM + A	7.6-15 cm	EquivSeg_Ammonium_N_kg_per_ha	12.5219
2015-11-24	85	A	85	DM + A	15-30 cm	EquivSeg_Ammonium_N_kg_per_ha	13.7349
2015-11-24	85	B	85	DM	15-30 cm	EquivSeg_Ammonium_N_kg_per_ha	10.8104
2015-11-24	85	C	85	Urea	15-30 cm	EquivSeg_Ammonium_N_kg_per_ha	11.5312
2015-11-24	85	D	85	SU	15-30 cm	EquivSeg_Ammonium_N_kg_per_ha	11.3849
2015-11-24	85	E	85	Control	15-30 cm	EquivSeg_Ammonium_N_kg_per_ha	11.7695
2015-11-24	86	A	86	DM	15-30 cm	EquivSeg_Ammonium_N_kg_per_ha	13.371
2015-11-24	86	B	86	DM + A	15-30 cm	EquivSeg_Ammonium_N_kg_per_ha	12.2083
2015-11-24	86	C	86	SU	15-30 cm	EquivSeg_Ammonium_N_kg_per_ha	12.2013
2015-11-24	86	D	86	Urea	15-30 cm	EquivSeg_Ammonium_N_kg_per_ha	13.7297
2015-11-24	86	E	86	Control	15-30 cm	EquivSeg_Ammonium_N_kg_per_ha	14.5505
2015-11-24	88	A	88	SU	15-30 cm	EquivSeg_Ammonium_N_kg_per_ha	18.5679
2015-11-24	88	B	88	Urea	15-30 cm	EquivSeg_Ammonium_N_kg_per_ha	19.8262
2015-11-24	88	C	88	Control	15-30 cm	EquivSeg_Ammonium_N_kg_per_ha	19.948
2015-11-24	88	D	88	DM + A	15-30 cm	EquivSeg_Ammonium_N_kg_per_ha	18.2754
2015-11-24	88	E	88	DM	15-30 cm	EquivSeg_Ammonium_N_kg_per_ha	17.4516
2015-11-24	89	A	89	Control	15-30 cm	EquivSeg_Ammonium_N_kg_per_ha	23.9014
2015-11-24	89	B	89	Urea	15-30 cm	EquivSeg_Ammonium_N_kg_per_ha	17.441
2015-11-24	89	C	89	SU	15-30 cm	EquivSeg_Ammonium_N_kg_per_ha	18.7124
2015-11-24	89	D	89	DM	15-30 cm	EquivSeg_Ammonium_N_kg_per_ha	17.8416
2015-11-24	89	E	89	DM + A	15-30 cm	EquivSeg_Ammonium_N_kg_per_ha	16.2968
2015-11-24	85	B	85	DM	30-61 cm	EquivSeg_Ammonium_N_kg_per_ha	47.8534
2015-11-24	85	C	85	Urea	30-61 cm	EquivSeg_Ammonium_N_kg_per_ha	39.5084
2015-11-24	85	D	85	SU	30-61 cm	EquivSeg_Ammonium_N_kg_per_ha	49.5073
2015-11-24	85	E	85	Control	30-61 cm	EquivSeg_Ammonium_N_kg_per_ha	51.0643
2015-11-24	86	A	86	DM	30-61 cm	EquivSeg_Ammonium_N_kg_per_ha	18.0941
2015-11-24	86	B	86	DM + A	30-61 cm	EquivSeg_Ammonium_N_kg_per_ha	26.8448
2015-11-24	86	C	86	SU	30-61 cm	EquivSeg_Ammonium_N_kg_per_ha	15.2727
2015-11-24	86	D	86	Urea	30-61 cm	EquivSeg_Ammonium_N_kg_per_ha	20.883
2015-11-24	86	E	86	Control	30-61 cm	EquivSeg_Ammonium_N_kg_per_ha	20.7845
2015-11-24	88	A	88	SU	30-61 cm	EquivSeg_Ammonium_N_kg_per_ha	20.336
2015-11-24	88	B	88	Urea	30-61 cm	EquivSeg_Ammonium_N_kg_per_ha	45.269
2015-11-24	88	C	88	Control	30-61 cm	EquivSeg_Ammonium_N_kg_per_ha	18.178
2015-11-24	88	D	88	DM + A	30-61 cm	EquivSeg_Ammonium_N_kg_per_ha	16.2705
2015-11-24	88	E	88	DM	30-61 cm	EquivSeg_Ammonium_N_kg_per_ha	18.5679
2015-11-24	89	A	89	Control	30-61 cm	EquivSeg_Ammonium_N_kg_per_ha	46.5352
2015-11-24	89	B	89	Urea	30-61 cm	EquivSeg_Ammonium_N_kg_per_ha	18.9503
2015-11-24	89	C	89	SU	30-61 cm	EquivSeg_Ammonium_N_kg_per_ha	14.9465
2015-11-24	89	D	89	DM	30-61 cm	EquivSeg_Ammonium_N_kg_per_ha	23.1234
2015-11-24	89	E	89	DM + A	30-61 cm	EquivSeg_Ammonium_N_kg_per_ha	21.4809
2015-11-24	85	A	85	DM + A	61-91 cm	EquivSeg_Ammonium_N_kg_per_ha	49.5736
2015-11-24	85	B	85	DM	61-91 cm	EquivSeg_Ammonium_N_kg_per_ha	56.8742
2015-11-24	85	C	85	Urea	61-91 cm	EquivSeg_Ammonium_N_kg_per_ha	41.1389
2015-11-24	85	D	85	SU	61-91 cm	EquivSeg_Ammonium_N_kg_per_ha	43.4316
2015-11-24	85	E	85	Control	61-91 cm	EquivSeg_Ammonium_N_kg_per_ha	31.4804
2015-11-24	86	A	86	DM	61-91 cm	EquivSeg_Ammonium_N_kg_per_ha	43.0898
2015-11-24	86	B	86	DM + A	61-91 cm	EquivSeg_Ammonium_N_kg_per_ha	22.0683
2015-11-24	86	C	86	SU	61-91 cm	EquivSeg_Ammonium_N_kg_per_ha	37.3189
2015-11-24	86	D	86	Urea	61-91 cm	EquivSeg_Ammonium_N_kg_per_ha	22.5529
2015-11-24	86	E	86	Control	61-91 cm	EquivSeg_Ammonium_N_kg_per_ha	18.8736
2015-11-24	88	A	88	SU	61-91 cm	EquivSeg_Ammonium_N_kg_per_ha	19.7139
2015-11-24	88	B	88	Urea	61-91 cm	EquivSeg_Ammonium_N_kg_per_ha	57.6846
2015-11-24	88	C	88	Control	61-91 cm	EquivSeg_Ammonium_N_kg_per_ha	40.2995
2015-11-24	88	D	88	DM + A	61-91 cm	EquivSeg_Ammonium_N_kg_per_ha	20.8664
2015-11-24	88	E	88	DM	61-91 cm	EquivSeg_Ammonium_N_kg_per_ha	40.6311
2015-11-24	89	A	89	Control	61-91 cm	EquivSeg_Ammonium_N_kg_per_ha	31.2112
2015-11-24	89	B	89	Urea	61-91 cm	EquivSeg_Ammonium_N_kg_per_ha	23.287
2015-11-24	89	C	89	SU	61-91 cm	EquivSeg_Ammonium_N_kg_per_ha	21.3399
2015-11-24	89	D	89	DM	61-91 cm	EquivSeg_Ammonium_N_kg_per_ha	31.7845
2015-11-24	89	E	89	DM + A	61-91 cm	EquivSeg_Ammonium_N_kg_per_ha	23.0799
2015-11-24	85	A	85	DM + A	91-120 cm	EquivSeg_Ammonium_N_kg_per_ha	42.4296
2015-11-24	85	B	85	DM	91-120 cm	EquivSeg_Ammonium_N_kg_per_ha	36.7103
2015-11-24	85	C	85	Urea	91-120 cm	EquivSeg_Ammonium_N_kg_per_ha	38.1142
2015-11-24	85	D	85	SU	91-120 cm	EquivSeg_Ammonium_N_kg_per_ha	28.1616
2015-11-24	85	E	85	Control	91-120 cm	EquivSeg_Ammonium_N_kg_per_ha	34.8011
2015-11-24	86	A	86	DM	91-120 cm	EquivSeg_Ammonium_N_kg_per_ha	33.5756
2015-11-24	86	B	86	DM + A	91-120 cm	EquivSeg_Ammonium_N_kg_per_ha	25.2447
2015-11-24	86	C	86	SU	91-120 cm	EquivSeg_Ammonium_N_kg_per_ha	15.1677
2015-11-24	86	D	86	Urea	91-120 cm	EquivSeg_Ammonium_N_kg_per_ha	15.3752
2015-11-24	86	E	86	Control	91-120 cm	EquivSeg_Ammonium_N_kg_per_ha	31.424
2015-11-24	88	A	88	SU	91-120 cm	EquivSeg_Ammonium_N_kg_per_ha	14.5913
2015-11-24	88	B	88	Urea	91-120 cm	EquivSeg_Ammonium_N_kg_per_ha	31.2974
2015-11-24	88	C	88	Control	91-120 cm	EquivSeg_Ammonium_N_kg_per_ha	33.375
2015-11-24	88	D	88	DM + A	91-120 cm	EquivSeg_Ammonium_N_kg_per_ha	16.9752
2015-11-24	88	E	88	DM	91-120 cm	EquivSeg_Ammonium_N_kg_per_ha	15.7138
2015-11-24	89	A	89	Control	91-120 cm	EquivSeg_Ammonium_N_kg_per_ha	25.7346
2015-11-24	89	B	89	Urea	91-120 cm	EquivSeg_Ammonium_N_kg_per_ha	23.9552
2015-11-24	89	C	89	SU	91-120 cm	EquivSeg_Ammonium_N_kg_per_ha	19.7955
2015-11-24	89	D	89	DM	91-120 cm	EquivSeg_Ammonium_N_kg_per_ha	18.988
2015-11-24	89	E	89	DM + A	91-120 cm	EquivSeg_Ammonium_N_kg_per_ha	17.6799
2016-11-16	85	A	85	DM + A	0-7.6 cm	EquivSeg_Ammonium_N_kg_per_ha	10.5957
2016-11-16	85	B	85	DM	0-7.6 cm	EquivSeg_Ammonium_N_kg_per_ha	8.09994
2016-11-16	85	C	85	Urea	0-7.6 cm	EquivSeg_Ammonium_N_kg_per_ha	8.42032
2016-11-16	85	D	85	SU	0-7.6 cm	EquivSeg_Ammonium_N_kg_per_ha	17.2774
2016-11-16	85	E	85	Control	0-7.6 cm	EquivSeg_Ammonium_N_kg_per_ha	8.82128
2016-11-16	86	A	86	DM	0-7.6 cm	EquivSeg_Ammonium_N_kg_per_ha	8.90093
2016-11-16	86	B	86	DM + A	0-7.6 cm	EquivSeg_Ammonium_N_kg_per_ha	6.10513
2016-11-16	86	C	86	SU	0-7.6 cm	EquivSeg_Ammonium_N_kg_per_ha	15.6655
2016-11-16	86	D	86	Urea	0-7.6 cm	EquivSeg_Ammonium_N_kg_per_ha	19.1278
2016-11-16	86	E	86	Control	0-7.6 cm	EquivSeg_Ammonium_N_kg_per_ha	5.18827
2016-11-16	88	A	88	SU	0-7.6 cm	EquivSeg_Ammonium_N_kg_per_ha	8.61353
2016-11-16	88	B	88	Urea	0-7.6 cm	EquivSeg_Ammonium_N_kg_per_ha	5.96439
2016-11-16	88	C	88	Control	0-7.6 cm	EquivSeg_Ammonium_N_kg_per_ha	14.9343
2016-11-16	88	D	88	DM + A	0-7.6 cm	EquivSeg_Ammonium_N_kg_per_ha	6.62074
2016-11-16	88	E	88	DM	0-7.6 cm	EquivSeg_Ammonium_N_kg_per_ha	7.86899
2016-11-16	89	A	89	Control	0-7.6 cm	EquivSeg_Ammonium_N_kg_per_ha	7.13808
2016-11-16	89	B	89	Urea	0-7.6 cm	EquivSeg_Ammonium_N_kg_per_ha	12.3205
2016-11-16	89	C	89	SU	0-7.6 cm	EquivSeg_Ammonium_N_kg_per_ha	8.73553
2016-11-16	89	D	89	DM	0-7.6 cm	EquivSeg_Ammonium_N_kg_per_ha	24.1682
2016-11-16	89	E	89	DM + A	0-7.6 cm	EquivSeg_Ammonium_N_kg_per_ha	12.1193
2016-11-16	85	A	85	DM + A	7.6-15 cm	EquivSeg_Ammonium_N_kg_per_ha	10.5485
2016-11-16	85	B	85	DM	7.6-15 cm	EquivSeg_Ammonium_N_kg_per_ha	8.42616
2016-11-16	85	C	85	Urea	7.6-15 cm	EquivSeg_Ammonium_N_kg_per_ha	10.4957
2016-11-16	85	D	85	SU	7.6-15 cm	EquivSeg_Ammonium_N_kg_per_ha	17.5576
2016-11-16	85	E	85	Control	7.6-15 cm	EquivSeg_Ammonium_N_kg_per_ha	9.24749
2016-11-16	86	A	86	DM	7.6-15 cm	EquivSeg_Ammonium_N_kg_per_ha	13.1801
2016-11-16	86	B	86	DM + A	7.6-15 cm	EquivSeg_Ammonium_N_kg_per_ha	10.901
2016-11-16	86	C	86	SU	7.6-15 cm	EquivSeg_Ammonium_N_kg_per_ha	7.91915
2016-11-16	86	D	86	Urea	7.6-15 cm	EquivSeg_Ammonium_N_kg_per_ha	7.38194
2016-11-16	86	E	86	Control	7.6-15 cm	EquivSeg_Ammonium_N_kg_per_ha	6.02777
2016-11-16	88	A	88	SU	7.6-15 cm	EquivSeg_Ammonium_N_kg_per_ha	7.38601
2016-11-16	88	B	88	Urea	7.6-15 cm	EquivSeg_Ammonium_N_kg_per_ha	7.84689
2016-11-16	88	C	88	Control	7.6-15 cm	EquivSeg_Ammonium_N_kg_per_ha	20.3766
2016-11-16	88	D	88	DM + A	7.6-15 cm	EquivSeg_Ammonium_N_kg_per_ha	8.35001
2016-11-16	88	E	88	DM	7.6-15 cm	EquivSeg_Ammonium_N_kg_per_ha	9.92114
2016-11-16	89	A	89	Control	7.6-15 cm	EquivSeg_Ammonium_N_kg_per_ha	7.81773
2016-11-16	89	B	89	Urea	7.6-15 cm	EquivSeg_Ammonium_N_kg_per_ha	13.6854
2016-11-16	89	C	89	SU	7.6-15 cm	EquivSeg_Ammonium_N_kg_per_ha	11.398
2016-11-16	89	D	89	DM	7.6-15 cm	EquivSeg_Ammonium_N_kg_per_ha	17.8111
2016-11-16	85	A	85	DM + A	15-30 cm	EquivSeg_Ammonium_N_kg_per_ha	15.2894
2016-11-16	85	B	85	DM	15-30 cm	EquivSeg_Ammonium_N_kg_per_ha	9.38003
2016-11-16	85	C	85	Urea	15-30 cm	EquivSeg_Ammonium_N_kg_per_ha	15.1614
2016-11-16	85	D	85	SU	15-30 cm	EquivSeg_Ammonium_N_kg_per_ha	20.6089
2016-11-16	85	E	85	Control	15-30 cm	EquivSeg_Ammonium_N_kg_per_ha	9.93144
2016-11-16	86	A	86	DM	15-30 cm	EquivSeg_Ammonium_N_kg_per_ha	9.49518
2016-11-16	86	B	86	DM + A	15-30 cm	EquivSeg_Ammonium_N_kg_per_ha	28.4981
2016-11-16	86	C	86	SU	15-30 cm	EquivSeg_Ammonium_N_kg_per_ha	29.6969
2016-11-16	86	D	86	Urea	15-30 cm	EquivSeg_Ammonium_N_kg_per_ha	13.8828
2016-11-16	86	E	86	Control	15-30 cm	EquivSeg_Ammonium_N_kg_per_ha	12.4163
2016-11-16	88	A	88	SU	15-30 cm	EquivSeg_Ammonium_N_kg_per_ha	8.19167
2016-11-16	88	B	88	Urea	15-30 cm	EquivSeg_Ammonium_N_kg_per_ha	11.6477
2016-11-16	88	C	88	Control	15-30 cm	EquivSeg_Ammonium_N_kg_per_ha	18.1534
2016-11-16	88	D	88	DM + A	15-30 cm	EquivSeg_Ammonium_N_kg_per_ha	10.6316
2016-11-16	88	E	88	DM	15-30 cm	EquivSeg_Ammonium_N_kg_per_ha	11.721
2016-11-16	89	A	89	Control	15-30 cm	EquivSeg_Ammonium_N_kg_per_ha	14.9069
2016-11-16	89	B	89	Urea	15-30 cm	EquivSeg_Ammonium_N_kg_per_ha	25.04
2016-11-16	89	C	89	SU	15-30 cm	EquivSeg_Ammonium_N_kg_per_ha	28.7118
2016-11-16	89	D	89	DM	15-30 cm	EquivSeg_Ammonium_N_kg_per_ha	30.9017
2016-11-16	85	A	85	DM + A	30-61 cm	EquivSeg_Ammonium_N_kg_per_ha	37.2481
2016-11-16	85	B	85	DM	30-61 cm	EquivSeg_Ammonium_N_kg_per_ha	25.0718
2016-11-16	85	C	85	Urea	30-61 cm	EquivSeg_Ammonium_N_kg_per_ha	13.9876
2016-11-16	85	D	85	SU	30-61 cm	EquivSeg_Ammonium_N_kg_per_ha	40.0031
2016-11-16	85	E	85	Control	30-61 cm	EquivSeg_Ammonium_N_kg_per_ha	30.1458
2016-11-16	86	A	86	DM	30-61 cm	EquivSeg_Ammonium_N_kg_per_ha	27.9768
2016-11-16	86	B	86	DM + A	30-61 cm	EquivSeg_Ammonium_N_kg_per_ha	12.1969
2016-11-16	86	C	86	SU	30-61 cm	EquivSeg_Ammonium_N_kg_per_ha	13.2707
2016-11-16	86	D	86	Urea	30-61 cm	EquivSeg_Ammonium_N_kg_per_ha	12.7175
2016-11-16	86	E	86	Control	30-61 cm	EquivSeg_Ammonium_N_kg_per_ha	13.3527
2016-11-16	88	A	88	SU	30-61 cm	EquivSeg_Ammonium_N_kg_per_ha	13.183
2016-11-16	88	B	88	Urea	30-61 cm	EquivSeg_Ammonium_N_kg_per_ha	47.5872
2016-11-16	88	C	88	Control	30-61 cm	EquivSeg_Ammonium_N_kg_per_ha	16.1187
2016-11-16	88	D	88	DM + A	30-61 cm	EquivSeg_Ammonium_N_kg_per_ha	23.3708
2016-11-16	88	E	88	DM	30-61 cm	EquivSeg_Ammonium_N_kg_per_ha	9.59381
2016-11-16	89	A	89	Control	30-61 cm	EquivSeg_Ammonium_N_kg_per_ha	22.8813
2016-11-16	89	B	89	Urea	30-61 cm	EquivSeg_Ammonium_N_kg_per_ha	22.5363
2016-11-16	89	C	89	SU	30-61 cm	EquivSeg_Ammonium_N_kg_per_ha	31.6386
2016-11-16	89	D	89	DM	30-61 cm	EquivSeg_Ammonium_N_kg_per_ha	41.8209
2016-11-16	89	E	89	DM + A	30-61 cm	EquivSeg_Ammonium_N_kg_per_ha	42.0836
2016-11-16	85	A	85	DM + A	61-91 cm	EquivSeg_Ammonium_N_kg_per_ha	21.0562
2016-11-16	85	B	85	DM	61-91 cm	EquivSeg_Ammonium_N_kg_per_ha	16.5385
2016-11-16	85	C	85	Urea	61-91 cm	EquivSeg_Ammonium_N_kg_per_ha	16.2312
2016-11-16	85	D	85	SU	61-91 cm	EquivSeg_Ammonium_N_kg_per_ha	22.7329
2016-11-16	85	E	85	Control	61-91 cm	EquivSeg_Ammonium_N_kg_per_ha	16.0453
2016-11-16	86	A	86	DM	61-91 cm	EquivSeg_Ammonium_N_kg_per_ha	32.9044
2016-11-16	86	B	86	DM + A	61-91 cm	EquivSeg_Ammonium_N_kg_per_ha	10.7649
2016-11-16	86	C	86	SU	61-91 cm	EquivSeg_Ammonium_N_kg_per_ha	31.3172
2016-11-16	86	D	86	Urea	61-91 cm	EquivSeg_Ammonium_N_kg_per_ha	12.3407
2016-11-16	86	E	86	Control	61-91 cm	EquivSeg_Ammonium_N_kg_per_ha	12.9127
2016-11-16	88	A	88	SU	61-91 cm	EquivSeg_Ammonium_N_kg_per_ha	16.4293
2016-11-16	88	B	88	Urea	61-91 cm	EquivSeg_Ammonium_N_kg_per_ha	13.8858
2016-11-16	88	C	88	Control	61-91 cm	EquivSeg_Ammonium_N_kg_per_ha	29.8243
2016-11-16	88	D	88	DM + A	61-91 cm	EquivSeg_Ammonium_N_kg_per_ha	10.0675
2016-11-16	88	E	88	DM	61-91 cm	EquivSeg_Ammonium_N_kg_per_ha	13.9297
2016-11-16	89	A	89	Control	61-91 cm	EquivSeg_Ammonium_N_kg_per_ha	34.2471
2016-11-16	89	B	89	Urea	61-91 cm	EquivSeg_Ammonium_N_kg_per_ha	25.4386
2016-11-16	89	C	89	SU	61-91 cm	EquivSeg_Ammonium_N_kg_per_ha	34.7492
2016-11-16	89	D	89	DM	61-91 cm	EquivSeg_Ammonium_N_kg_per_ha	34.9078
2016-11-16	89	E	89	DM + A	61-91 cm	EquivSeg_Ammonium_N_kg_per_ha	35.415
2016-11-16	85	A	85	DM + A	91-120 cm	EquivSeg_Ammonium_N_kg_per_ha	12.695
2016-11-16	85	B	85	DM	91-120 cm	EquivSeg_Ammonium_N_kg_per_ha	35.0447
2016-11-16	85	C	85	Urea	91-120 cm	EquivSeg_Ammonium_N_kg_per_ha	11.2394
2016-11-16	85	D	85	SU	91-120 cm	EquivSeg_Ammonium_N_kg_per_ha	26.4922
2016-11-16	85	E	85	Control	91-120 cm	EquivSeg_Ammonium_N_kg_per_ha	28.8858
2016-11-16	86	A	86	DM	91-120 cm	EquivSeg_Ammonium_N_kg_per_ha	16.623
2016-11-16	86	B	86	DM + A	91-120 cm	EquivSeg_Ammonium_N_kg_per_ha	31.6133
2016-11-16	86	C	86	SU	91-120 cm	EquivSeg_Ammonium_N_kg_per_ha	27.1555
2016-11-16	86	D	86	Urea	91-120 cm	EquivSeg_Ammonium_N_kg_per_ha	12.6283
2016-11-16	86	E	86	Control	91-120 cm	EquivSeg_Ammonium_N_kg_per_ha	17.9565
2016-11-16	88	A	88	SU	91-120 cm	EquivSeg_Ammonium_N_kg_per_ha	8.24382
2016-11-16	88	B	88	Urea	91-120 cm	EquivSeg_Ammonium_N_kg_per_ha	14.7623
2016-11-16	88	C	88	Control	91-120 cm	EquivSeg_Ammonium_N_kg_per_ha	22.7161
2016-11-16	88	D	88	DM + A	91-120 cm	EquivSeg_Ammonium_N_kg_per_ha	9.36461
2016-11-16	88	E	88	DM	91-120 cm	EquivSeg_Ammonium_N_kg_per_ha	18.3562
2016-11-16	89	A	89	Control	91-120 cm	EquivSeg_Ammonium_N_kg_per_ha	25.8414
2016-11-16	89	B	89	Urea	91-120 cm	EquivSeg_Ammonium_N_kg_per_ha	25.1209
2016-11-16	89	C	89	SU	91-120 cm	EquivSeg_Ammonium_N_kg_per_ha	31.746
2016-11-16	89	D	89	DM	91-120 cm	EquivSeg_Ammonium_N_kg_per_ha	36.0288
2016-11-16	89	E	89	DM + A	91-120 cm	EquivSeg_Ammonium_N_kg_per_ha	33.4838
2016-11-16	85	B	85	DM	120-150 cm	EquivSeg_Ammonium_N_kg_per_ha	38.0826
2016-11-16	85	C	85	Urea	120-150 cm	EquivSeg_Ammonium_N_kg_per_ha	18.976
2016-11-16	85	D	85	SU	120-150 cm	EquivSeg_Ammonium_N_kg_per_ha	31.5322
2016-11-16	85	E	85	Control	120-150 cm	EquivSeg_Ammonium_N_kg_per_ha	18.8408
2016-11-16	86	A	86	DM	120-150 cm	EquivSeg_Ammonium_N_kg_per_ha	46.7893
2016-11-16	86	D	86	Urea	120-150 cm	EquivSeg_Ammonium_N_kg_per_ha	16.0949
2016-11-16	86	E	86	Control	120-150 cm	EquivSeg_Ammonium_N_kg_per_ha	21.3936
2016-11-16	88	A	88	SU	120-150 cm	EquivSeg_Ammonium_N_kg_per_ha	10.7629
2016-11-16	88	C	88	Control	120-150 cm	EquivSeg_Ammonium_N_kg_per_ha	23.3494
2016-11-16	88	D	88	DM + A	120-150 cm	EquivSeg_Ammonium_N_kg_per_ha	25.8253
2016-11-16	88	E	88	DM	120-150 cm	EquivSeg_Ammonium_N_kg_per_ha	15.722
2016-11-16	89	A	89	Control	120-150 cm	EquivSeg_Ammonium_N_kg_per_ha	25.9924
2016-11-16	89	B	89	Urea	120-150 cm	EquivSeg_Ammonium_N_kg_per_ha	23.3244
2016-11-16	89	C	89	SU	120-150 cm	EquivSeg_Ammonium_N_kg_per_ha	32.6166
2016-11-16	89	D	89	DM	120-150 cm	EquivSeg_Ammonium_N_kg_per_ha	39.818
2016-11-16	89	E	89	DM + A	120-150 cm	EquivSeg_Ammonium_N_kg_per_ha	47.591
2017-11-13	85	A	85	DM + SU	0-7.6 cm	EquivSeg_Ammonium_N_kg_per_ha	13.7931
2017-11-13	86	A	86	DM	0-7.6 cm	EquivSeg_Ammonium_N_kg_per_ha	20.285
2017-11-13	86	B	86	DM + SU	0-7.6 cm	EquivSeg_Ammonium_N_kg_per_ha	25.2278
2017-11-13	86	C	86	SU	0-7.6 cm	EquivSeg_Ammonium_N_kg_per_ha	18.6998
2017-11-13	86	D	86	Urea	0-7.6 cm	EquivSeg_Ammonium_N_kg_per_ha	19.9471
2017-11-13	86	E	86	Control	0-7.6 cm	EquivSeg_Ammonium_N_kg_per_ha	12.6419
2017-11-13	88	A	88	SU	0-7.6 cm	EquivSeg_Ammonium_N_kg_per_ha	15.6917
2017-11-13	88	B	88	Urea	0-7.6 cm	EquivSeg_Ammonium_N_kg_per_ha	14.4588
2017-11-13	88	C	88	Control	0-7.6 cm	EquivSeg_Ammonium_N_kg_per_ha	13.4996
2017-11-13	88	D	88	DM + SU	0-7.6 cm	EquivSeg_Ammonium_N_kg_per_ha	18.9525
2017-11-13	88	E	88	DM	0-7.6 cm	EquivSeg_Ammonium_N_kg_per_ha	18.2164
2017-11-13	89	A	89	Control	0-7.6 cm	EquivSeg_Ammonium_N_kg_per_ha	12.5425
2017-11-13	89	B	89	Urea	0-7.6 cm	EquivSeg_Ammonium_N_kg_per_ha	14.3584
2017-11-13	89	C	89	SU	0-7.6 cm	EquivSeg_Ammonium_N_kg_per_ha	15.0613
2017-11-13	89	D	89	DM	0-7.6 cm	EquivSeg_Ammonium_N_kg_per_ha	14.733
2017-11-13	89	E	89	DM + SU	0-7.6 cm	EquivSeg_Ammonium_N_kg_per_ha	15.389
2017-11-13	85	A	85	DM + SU	7.6-15 cm	EquivSeg_Ammonium_N_kg_per_ha	11.1959
2017-11-13	86	A	86	DM	7.6-15 cm	EquivSeg_Ammonium_N_kg_per_ha	27.7632
2017-11-13	86	B	86	DM + SU	7.6-15 cm	EquivSeg_Ammonium_N_kg_per_ha	20.2082
2017-11-13	86	C	86	SU	7.6-15 cm	EquivSeg_Ammonium_N_kg_per_ha	15.7963
2017-11-13	86	D	86	Urea	7.6-15 cm	EquivSeg_Ammonium_N_kg_per_ha	14.3329
2017-11-13	86	E	86	Control	7.6-15 cm	EquivSeg_Ammonium_N_kg_per_ha	14.4961
2017-11-13	88	A	88	SU	7.6-15 cm	EquivSeg_Ammonium_N_kg_per_ha	16.2677
2017-11-13	88	B	88	Urea	7.6-15 cm	EquivSeg_Ammonium_N_kg_per_ha	20.0614
2017-11-13	88	C	88	Control	7.6-15 cm	EquivSeg_Ammonium_N_kg_per_ha	16.3514
2017-11-13	88	D	88	DM + SU	7.6-15 cm	EquivSeg_Ammonium_N_kg_per_ha	19.109
2017-11-13	88	E	88	DM	7.6-15 cm	EquivSeg_Ammonium_N_kg_per_ha	14.8715
2017-11-13	89	A	89	Control	7.6-15 cm	EquivSeg_Ammonium_N_kg_per_ha	14.953
2017-11-13	89	B	89	Urea	7.6-15 cm	EquivSeg_Ammonium_N_kg_per_ha	14.707
2017-11-13	89	C	89	SU	7.6-15 cm	EquivSeg_Ammonium_N_kg_per_ha	14.5745
2017-11-13	89	D	89	DM	7.6-15 cm	EquivSeg_Ammonium_N_kg_per_ha	15.342
2017-11-13	89	E	89	DM + SU	7.6-15 cm	EquivSeg_Ammonium_N_kg_per_ha	15.1549
2017-11-13	85	A	85	DM + SU	15-30 cm	EquivSeg_Ammonium_N_kg_per_ha	19.8003
2017-11-13	86	A	86	DM	15-30 cm	EquivSeg_Ammonium_N_kg_per_ha	41.5842
2017-11-13	86	B	86	DM + SU	15-30 cm	EquivSeg_Ammonium_N_kg_per_ha	36.6535
2017-11-13	86	C	86	SU	15-30 cm	EquivSeg_Ammonium_N_kg_per_ha	25.1397
2017-11-13	86	D	86	Urea	15-30 cm	EquivSeg_Ammonium_N_kg_per_ha	31.4236
2017-11-13	86	E	86	Control	15-30 cm	EquivSeg_Ammonium_N_kg_per_ha	27.9513
2017-11-13	88	A	88	SU	15-30 cm	EquivSeg_Ammonium_N_kg_per_ha	27.6436
2017-11-13	88	B	88	Urea	15-30 cm	EquivSeg_Ammonium_N_kg_per_ha	28.9177
2017-11-13	88	C	88	Control	15-30 cm	EquivSeg_Ammonium_N_kg_per_ha	22.3647
2017-11-13	88	D	88	DM + SU	15-30 cm	EquivSeg_Ammonium_N_kg_per_ha	27.7587
2017-11-13	88	E	88	DM	15-30 cm	EquivSeg_Ammonium_N_kg_per_ha	25.5162
2017-11-13	89	A	89	Control	15-30 cm	EquivSeg_Ammonium_N_kg_per_ha	32.7876
2017-11-13	89	B	89	Urea	15-30 cm	EquivSeg_Ammonium_N_kg_per_ha	33.6579
2017-11-13	89	C	89	SU	15-30 cm	EquivSeg_Ammonium_N_kg_per_ha	22.1202
2017-11-13	89	D	89	DM	15-30 cm	EquivSeg_Ammonium_N_kg_per_ha	30.5056
2017-11-13	89	E	89	DM + SU	15-30 cm	EquivSeg_Ammonium_N_kg_per_ha	21.8842
2017-11-13	85	A	85	DM + SU	30-61 cm	EquivSeg_Ammonium_N_kg_per_ha	29.7975
2017-11-13	85	B	85	DM	30-61 cm	EquivSeg_Ammonium_N_kg_per_ha	31.9575
2017-11-13	85	C	85	Urea	30-61 cm	EquivSeg_Ammonium_N_kg_per_ha	22.8805
2017-11-13	85	D	85	SU	30-61 cm	EquivSeg_Ammonium_N_kg_per_ha	40.4605
2017-11-13	85	E	85	Control	30-61 cm	EquivSeg_Ammonium_N_kg_per_ha	25.6811
2017-11-13	86	A	86	DM	30-61 cm	EquivSeg_Ammonium_N_kg_per_ha	31.1536
2017-11-13	86	B	86	DM + SU	30-61 cm	EquivSeg_Ammonium_N_kg_per_ha	34.8213
2017-11-13	86	C	86	SU	30-61 cm	EquivSeg_Ammonium_N_kg_per_ha	37.6381
2017-11-13	86	D	86	Urea	30-61 cm	EquivSeg_Ammonium_N_kg_per_ha	35.5102
2017-11-13	86	E	86	Control	30-61 cm	EquivSeg_Ammonium_N_kg_per_ha	28.2007
2017-11-13	88	A	88	SU	30-61 cm	EquivSeg_Ammonium_N_kg_per_ha	57.3111
2017-11-13	88	B	88	Urea	30-61 cm	EquivSeg_Ammonium_N_kg_per_ha	34.3965
2017-11-13	88	C	88	Control	30-61 cm	EquivSeg_Ammonium_N_kg_per_ha	40.9112
2017-11-13	88	D	88	DM + SU	30-61 cm	EquivSeg_Ammonium_N_kg_per_ha	32.3536
2017-11-13	88	E	88	DM	30-61 cm	EquivSeg_Ammonium_N_kg_per_ha	59.7537
2017-11-13	89	A	89	Control	30-61 cm	EquivSeg_Ammonium_N_kg_per_ha	37.1347
2017-11-13	89	C	89	SU	30-61 cm	EquivSeg_Ammonium_N_kg_per_ha	62.6218
2017-11-13	89	D	89	DM	30-61 cm	EquivSeg_Ammonium_N_kg_per_ha	75.1066
2017-11-13	89	E	89	DM + SU	30-61 cm	EquivSeg_Ammonium_N_kg_per_ha	54.9501
2017-11-13	85	A	85	DM + SU	61-91 cm	EquivSeg_Ammonium_N_kg_per_ha	35.6415
2017-11-13	85	B	85	DM	61-91 cm	EquivSeg_Ammonium_N_kg_per_ha	31.0483
2017-11-13	85	C	85	Urea	61-91 cm	EquivSeg_Ammonium_N_kg_per_ha	31.8318
2017-11-13	85	D	85	SU	61-91 cm	EquivSeg_Ammonium_N_kg_per_ha	30.4308
2017-11-13	85	E	85	Control	61-91 cm	EquivSeg_Ammonium_N_kg_per_ha	32.6202
2017-11-13	86	A	86	DM	61-91 cm	EquivSeg_Ammonium_N_kg_per_ha	26.4603
2017-11-13	86	B	86	DM + SU	61-91 cm	EquivSeg_Ammonium_N_kg_per_ha	28.1146
2017-11-13	86	C	86	SU	61-91 cm	EquivSeg_Ammonium_N_kg_per_ha	36.2065
2017-11-13	86	D	86	Urea	61-91 cm	EquivSeg_Ammonium_N_kg_per_ha	31.6915
2017-11-13	86	E	86	Control	61-91 cm	EquivSeg_Ammonium_N_kg_per_ha	29.1714
2017-11-13	88	A	88	SU	61-91 cm	EquivSeg_Ammonium_N_kg_per_ha	32.9402
2017-11-13	88	B	88	Urea	61-91 cm	EquivSeg_Ammonium_N_kg_per_ha	34.0112
2017-11-13	88	C	88	Control	61-91 cm	EquivSeg_Ammonium_N_kg_per_ha	34.9081
2017-11-13	88	D	88	DM + SU	61-91 cm	EquivSeg_Ammonium_N_kg_per_ha	29.1074
2017-11-13	88	E	88	DM	61-91 cm	EquivSeg_Ammonium_N_kg_per_ha	45.1825
2017-11-13	89	A	89	Control	61-91 cm	EquivSeg_Ammonium_N_kg_per_ha	32.9822
2017-11-13	89	B	89	Urea	61-91 cm	EquivSeg_Ammonium_N_kg_per_ha	58.8981
2017-11-13	89	C	89	SU	61-91 cm	EquivSeg_Ammonium_N_kg_per_ha	59.7302
2017-11-13	89	D	89	DM	61-91 cm	EquivSeg_Ammonium_N_kg_per_ha	58.5552
2017-11-13	89	E	89	DM + SU	61-91 cm	EquivSeg_Ammonium_N_kg_per_ha	57.8116
2017-11-13	85	A	85	DM + SU	91-120 cm	EquivSeg_Ammonium_N_kg_per_ha	29.4592
2017-11-13	85	B	85	DM	91-120 cm	EquivSeg_Ammonium_N_kg_per_ha	21.987
2017-11-13	85	C	85	Urea	91-120 cm	EquivSeg_Ammonium_N_kg_per_ha	21.8972
2017-11-13	85	D	85	SU	91-120 cm	EquivSeg_Ammonium_N_kg_per_ha	24.7003
2017-11-13	85	E	85	Control	91-120 cm	EquivSeg_Ammonium_N_kg_per_ha	25.6631
2017-11-13	86	A	86	DM	91-120 cm	EquivSeg_Ammonium_N_kg_per_ha	30.7567
2017-11-13	86	B	86	DM + SU	91-120 cm	EquivSeg_Ammonium_N_kg_per_ha	29.2045
2017-11-13	86	C	86	SU	91-120 cm	EquivSeg_Ammonium_N_kg_per_ha	26.43
2017-11-13	86	D	86	Urea	91-120 cm	EquivSeg_Ammonium_N_kg_per_ha	23.1777
2017-11-13	86	E	86	Control	91-120 cm	EquivSeg_Ammonium_N_kg_per_ha	23.8233
2017-11-13	88	A	88	SU	91-120 cm	EquivSeg_Ammonium_N_kg_per_ha	29.2303
2017-11-13	88	B	88	Urea	91-120 cm	EquivSeg_Ammonium_N_kg_per_ha	27.1294
2017-11-13	88	C	88	Control	91-120 cm	EquivSeg_Ammonium_N_kg_per_ha	41.6853
2017-11-13	88	D	88	DM + SU	91-120 cm	EquivSeg_Ammonium_N_kg_per_ha	33.4616
2017-11-13	88	E	88	DM	91-120 cm	EquivSeg_Ammonium_N_kg_per_ha	43.5203
2017-11-13	89	A	89	Control	91-120 cm	EquivSeg_Ammonium_N_kg_per_ha	25.7792
2017-11-13	89	C	89	SU	91-120 cm	EquivSeg_Ammonium_N_kg_per_ha	54.8526
2017-11-13	89	D	89	DM	91-120 cm	EquivSeg_Ammonium_N_kg_per_ha	44.3985
2017-11-13	89	E	89	DM + SU	91-120 cm	EquivSeg_Ammonium_N_kg_per_ha	45.2663
2017-11-13	85	B	85	DM	120-150 cm	EquivSeg_Ammonium_N_kg_per_ha	39.7295
2017-11-13	85	C	85	Urea	120-150 cm	EquivSeg_Ammonium_N_kg_per_ha	33.8591
2017-11-13	85	D	85	SU	120-150 cm	EquivSeg_Ammonium_N_kg_per_ha	32.8424
2017-11-13	85	E	85	Control	120-150 cm	EquivSeg_Ammonium_N_kg_per_ha	35.5716
2017-11-13	86	C	86	SU	120-150 cm	EquivSeg_Ammonium_N_kg_per_ha	51.8041
2017-11-13	86	D	86	Urea	120-150 cm	EquivSeg_Ammonium_N_kg_per_ha	45.6201
2017-11-13	86	E	86	Control	120-150 cm	EquivSeg_Ammonium_N_kg_per_ha	29.6197
2017-11-13	89	A	89	Control	120-150 cm	EquivSeg_Ammonium_N_kg_per_ha	49.5471
2017-11-13	89	B	89	Urea	120-150 cm	EquivSeg_Ammonium_N_kg_per_ha	59.6504
2017-11-13	89	C	89	SU	120-150 cm	EquivSeg_Ammonium_N_kg_per_ha	67.7024
2012-02-01	85	A	85	DM + A	0-7.6 cm	EquivSeg_Extractable_P_kg_per_ha	7.25307
2012-02-01	85	B	85	DM	0-7.6 cm	EquivSeg_Extractable_P_kg_per_ha	21.5862
2012-02-01	85	C	85	Urea	0-7.6 cm	EquivSeg_Extractable_P_kg_per_ha	8.78156
2012-02-01	85	D	85	SU	0-7.6 cm	EquivSeg_Extractable_P_kg_per_ha	15.2573
2012-02-01	85	E	85	Control	0-7.6 cm	EquivSeg_Extractable_P_kg_per_ha	20.1838
2012-02-01	86	A	86	DM	0-7.6 cm	EquivSeg_Extractable_P_kg_per_ha	53.8108
2012-02-01	86	B	86	DM + A	0-7.6 cm	EquivSeg_Extractable_P_kg_per_ha	26.063
2012-02-01	86	C	86	SU	0-7.6 cm	EquivSeg_Extractable_P_kg_per_ha	11.371
2012-02-01	86	E	86	Control	0-7.6 cm	EquivSeg_Extractable_P_kg_per_ha	20.5606
2012-02-01	88	A	88	SU	0-7.6 cm	EquivSeg_Extractable_P_kg_per_ha	18.5474
2012-02-01	88	B	88	Urea	0-7.6 cm	EquivSeg_Extractable_P_kg_per_ha	12.7619
2012-02-01	88	C	88	Control	0-7.6 cm	EquivSeg_Extractable_P_kg_per_ha	17.6747
2012-02-01	88	D	88	DM + A	0-7.6 cm	EquivSeg_Extractable_P_kg_per_ha	15.3959
2012-02-01	88	E	88	DM	0-7.6 cm	EquivSeg_Extractable_P_kg_per_ha	28.0115
2012-02-01	89	A	89	Control	0-7.6 cm	EquivSeg_Extractable_P_kg_per_ha	24.9877
2012-02-01	89	B	89	Urea	0-7.6 cm	EquivSeg_Extractable_P_kg_per_ha	29.2343
2012-02-01	89	C	89	SU	0-7.6 cm	EquivSeg_Extractable_P_kg_per_ha	10.336
2012-02-01	89	D	89	DM	0-7.6 cm	EquivSeg_Extractable_P_kg_per_ha	49.2222
2012-02-01	89	E	89	DM + A	0-7.6 cm	EquivSeg_Extractable_P_kg_per_ha	21.4191
2012-02-01	85	A	85	DM + A	7.6-15 cm	EquivSeg_Extractable_P_kg_per_ha	2.83475
2012-02-01	85	B	85	DM	7.6-15 cm	EquivSeg_Extractable_P_kg_per_ha	4.43188
2012-02-01	85	C	85	Urea	7.6-15 cm	EquivSeg_Extractable_P_kg_per_ha	2.55556
2012-02-01	85	D	85	SU	7.6-15 cm	EquivSeg_Extractable_P_kg_per_ha	1.69496
2012-02-01	85	E	85	Control	7.6-15 cm	EquivSeg_Extractable_P_kg_per_ha	2.46927
2012-02-01	86	A	86	DM	7.6-15 cm	EquivSeg_Extractable_P_kg_per_ha	12.8913
2012-02-01	86	B	86	DM + A	7.6-15 cm	EquivSeg_Extractable_P_kg_per_ha	8.1237
2012-02-01	86	C	86	SU	7.6-15 cm	EquivSeg_Extractable_P_kg_per_ha	3.02533
2012-02-01	86	D	86	Urea	7.6-15 cm	EquivSeg_Extractable_P_kg_per_ha	5.86438
2012-02-01	86	E	86	Control	7.6-15 cm	EquivSeg_Extractable_P_kg_per_ha	5.73259
2012-02-01	88	A	88	SU	7.6-15 cm	EquivSeg_Extractable_P_kg_per_ha	4.21209
2012-02-01	88	B	88	Urea	7.6-15 cm	EquivSeg_Extractable_P_kg_per_ha	2.85122
2012-02-01	88	C	88	Control	7.6-15 cm	EquivSeg_Extractable_P_kg_per_ha	5.75345
2012-02-01	88	D	88	DM + A	7.6-15 cm	EquivSeg_Extractable_P_kg_per_ha	3.00984
2012-02-01	88	E	88	DM	7.6-15 cm	EquivSeg_Extractable_P_kg_per_ha	5.10864
2012-02-01	89	A	89	Control	7.6-15 cm	EquivSeg_Extractable_P_kg_per_ha	7.3695
2012-02-01	89	B	89	Urea	7.6-15 cm	EquivSeg_Extractable_P_kg_per_ha	3.78346
2012-02-01	89	C	89	SU	7.6-15 cm	EquivSeg_Extractable_P_kg_per_ha	2.91006
2012-02-01	89	D	89	DM	7.6-15 cm	EquivSeg_Extractable_P_kg_per_ha	6.97101
2012-02-01	89	E	89	DM + A	7.6-15 cm	EquivSeg_Extractable_P_kg_per_ha	7.1645
2012-02-01	85	A	85	DM + A	15-30 cm	EquivSeg_Extractable_P_kg_per_ha	3.69175
2012-02-01	85	B	85	DM	15-30 cm	EquivSeg_Extractable_P_kg_per_ha	2.914
2012-02-01	85	C	85	Urea	15-30 cm	EquivSeg_Extractable_P_kg_per_ha	2.98879
2012-02-01	85	D	85	SU	15-30 cm	EquivSeg_Extractable_P_kg_per_ha	4.78321
2012-02-01	85	E	85	Control	15-30 cm	EquivSeg_Extractable_P_kg_per_ha	2.71049
2012-02-01	86	A	86	DM	15-30 cm	EquivSeg_Extractable_P_kg_per_ha	6.15808
2012-02-01	86	B	86	DM + A	15-30 cm	EquivSeg_Extractable_P_kg_per_ha	4.31233
2012-02-01	86	C	86	SU	15-30 cm	EquivSeg_Extractable_P_kg_per_ha	4.66814
2012-02-01	86	D	86	Urea	15-30 cm	EquivSeg_Extractable_P_kg_per_ha	3.39782
2012-02-01	86	E	86	Control	15-30 cm	EquivSeg_Extractable_P_kg_per_ha	4.25474
2012-02-01	88	A	88	SU	15-30 cm	EquivSeg_Extractable_P_kg_per_ha	2.98779
2012-02-01	88	B	88	Urea	15-30 cm	EquivSeg_Extractable_P_kg_per_ha	3.96152
2012-02-01	88	C	88	Control	15-30 cm	EquivSeg_Extractable_P_kg_per_ha	3.80349
2012-02-01	88	D	88	DM + A	15-30 cm	EquivSeg_Extractable_P_kg_per_ha	5.1995
2012-02-01	88	E	88	DM	15-30 cm	EquivSeg_Extractable_P_kg_per_ha	2.94789
2012-02-01	89	A	89	Control	15-30 cm	EquivSeg_Extractable_P_kg_per_ha	5.03185
2012-02-01	89	B	89	Urea	15-30 cm	EquivSeg_Extractable_P_kg_per_ha	4.00913
2012-02-01	89	C	89	SU	15-30 cm	EquivSeg_Extractable_P_kg_per_ha	2.62272
2012-02-01	89	D	89	DM	15-30 cm	EquivSeg_Extractable_P_kg_per_ha	3.78993
2012-02-01	89	E	89	DM + A	15-30 cm	EquivSeg_Extractable_P_kg_per_ha	9.0297
2012-11-16	85	A	85	DM + A	0-7.6 cm	EquivSeg_Extractable_P_kg_per_ha	59.9414
2012-11-16	85	B	85	DM	0-7.6 cm	EquivSeg_Extractable_P_kg_per_ha	33.6657
2012-11-16	85	C	85	Urea	0-7.6 cm	EquivSeg_Extractable_P_kg_per_ha	4.66369
2012-11-16	85	D	85	SU	0-7.6 cm	EquivSeg_Extractable_P_kg_per_ha	5.59404
2012-11-16	85	E	85	Control	0-7.6 cm	EquivSeg_Extractable_P_kg_per_ha	5.76379
2012-11-16	86	A	86	DM	0-7.6 cm	EquivSeg_Extractable_P_kg_per_ha	93.0323
2012-11-16	86	B	86	DM + A	0-7.6 cm	EquivSeg_Extractable_P_kg_per_ha	47.2097
2012-11-16	86	C	86	SU	0-7.6 cm	EquivSeg_Extractable_P_kg_per_ha	9.44549
2012-11-16	86	D	86	Urea	0-7.6 cm	EquivSeg_Extractable_P_kg_per_ha	7.04526
2012-11-16	86	E	86	Control	0-7.6 cm	EquivSeg_Extractable_P_kg_per_ha	6.52345
2012-11-16	88	A	88	SU	0-7.6 cm	EquivSeg_Extractable_P_kg_per_ha	13.3643
2012-11-16	88	B	88	Urea	0-7.6 cm	EquivSeg_Extractable_P_kg_per_ha	9.608
2012-11-16	88	C	88	Control	0-7.6 cm	EquivSeg_Extractable_P_kg_per_ha	10.3747
2012-11-16	88	D	88	DM + A	0-7.6 cm	EquivSeg_Extractable_P_kg_per_ha	107.869
2012-11-16	88	E	88	DM	0-7.6 cm	EquivSeg_Extractable_P_kg_per_ha	52.1878
2012-11-16	89	A	89	Control	0-7.6 cm	EquivSeg_Extractable_P_kg_per_ha	13.4308
2012-11-16	89	B	89	Urea	0-7.6 cm	EquivSeg_Extractable_P_kg_per_ha	6.9452
2012-11-16	89	C	89	SU	0-7.6 cm	EquivSeg_Extractable_P_kg_per_ha	9.42417
2012-11-16	89	D	89	DM	0-7.6 cm	EquivSeg_Extractable_P_kg_per_ha	36.2661
2012-11-16	89	E	89	DM + A	0-7.6 cm	EquivSeg_Extractable_P_kg_per_ha	73.8604
2012-11-16	85	A	85	DM + A	7.6-15 cm	EquivSeg_Extractable_P_kg_per_ha	40.6786
2012-11-16	85	B	85	DM	7.6-15 cm	EquivSeg_Extractable_P_kg_per_ha	30.1869
2012-11-16	85	C	85	Urea	7.6-15 cm	EquivSeg_Extractable_P_kg_per_ha	3.23281
2012-11-16	85	D	85	SU	7.6-15 cm	EquivSeg_Extractable_P_kg_per_ha	3.57585
2012-11-16	85	E	85	Control	7.6-15 cm	EquivSeg_Extractable_P_kg_per_ha	3.76153
2012-11-16	86	A	86	DM	7.6-15 cm	EquivSeg_Extractable_P_kg_per_ha	56.9312
2012-11-16	86	B	86	DM + A	7.6-15 cm	EquivSeg_Extractable_P_kg_per_ha	28.166
2012-11-16	86	C	86	SU	7.6-15 cm	EquivSeg_Extractable_P_kg_per_ha	7.00731
2012-11-16	86	D	86	Urea	7.6-15 cm	EquivSeg_Extractable_P_kg_per_ha	3.68165
2012-11-16	86	E	86	Control	7.6-15 cm	EquivSeg_Extractable_P_kg_per_ha	3.65354
2012-11-16	88	A	88	SU	7.6-15 cm	EquivSeg_Extractable_P_kg_per_ha	7.25171
2012-11-16	88	B	88	Urea	7.6-15 cm	EquivSeg_Extractable_P_kg_per_ha	4.76931
2012-11-16	88	C	88	Control	7.6-15 cm	EquivSeg_Extractable_P_kg_per_ha	4.6521
2012-11-16	88	D	88	DM + A	7.6-15 cm	EquivSeg_Extractable_P_kg_per_ha	75.7957
2012-11-16	88	E	88	DM	7.6-15 cm	EquivSeg_Extractable_P_kg_per_ha	14.7125
2012-11-16	89	A	89	Control	7.6-15 cm	EquivSeg_Extractable_P_kg_per_ha	7.24992
2012-11-16	89	B	89	Urea	7.6-15 cm	EquivSeg_Extractable_P_kg_per_ha	4.00167
2012-11-16	89	C	89	SU	7.6-15 cm	EquivSeg_Extractable_P_kg_per_ha	4.75404
2012-11-16	89	D	89	DM	7.6-15 cm	EquivSeg_Extractable_P_kg_per_ha	17.1749
2012-11-16	89	E	89	DM + A	7.6-15 cm	EquivSeg_Extractable_P_kg_per_ha	45.5288
2012-11-16	85	A	85	DM + A	15-30 cm	EquivSeg_Extractable_P_kg_per_ha	7.16274
2012-11-16	85	B	85	DM	15-30 cm	EquivSeg_Extractable_P_kg_per_ha	9.83624
2012-11-16	85	C	85	Urea	15-30 cm	EquivSeg_Extractable_P_kg_per_ha	5.09705
2012-11-16	85	D	85	SU	15-30 cm	EquivSeg_Extractable_P_kg_per_ha	4.37314
2012-11-16	85	E	85	Control	15-30 cm	EquivSeg_Extractable_P_kg_per_ha	6.19741
2012-11-16	86	A	86	DM	15-30 cm	EquivSeg_Extractable_P_kg_per_ha	6.93782
2012-11-16	86	B	86	DM + A	15-30 cm	EquivSeg_Extractable_P_kg_per_ha	19.3801
2012-11-16	86	C	86	SU	15-30 cm	EquivSeg_Extractable_P_kg_per_ha	6.48517
2012-11-16	86	D	86	Urea	15-30 cm	EquivSeg_Extractable_P_kg_per_ha	7.21445
2012-11-16	86	E	86	Control	15-30 cm	EquivSeg_Extractable_P_kg_per_ha	4.76226
2012-11-16	88	A	88	SU	15-30 cm	EquivSeg_Extractable_P_kg_per_ha	8.95329
2012-11-16	88	B	88	Urea	15-30 cm	EquivSeg_Extractable_P_kg_per_ha	4.90359
2012-11-16	88	C	88	Control	15-30 cm	EquivSeg_Extractable_P_kg_per_ha	6.25161
2012-11-16	88	D	88	DM + A	15-30 cm	EquivSeg_Extractable_P_kg_per_ha	14.8978
2012-11-16	88	E	88	DM	15-30 cm	EquivSeg_Extractable_P_kg_per_ha	7.41326
2012-11-16	89	A	89	Control	15-30 cm	EquivSeg_Extractable_P_kg_per_ha	7.06521
2012-11-16	89	B	89	Urea	15-30 cm	EquivSeg_Extractable_P_kg_per_ha	5.47777
2012-11-16	89	C	89	SU	15-30 cm	EquivSeg_Extractable_P_kg_per_ha	5.00881
2012-11-16	89	D	89	DM	15-30 cm	EquivSeg_Extractable_P_kg_per_ha	7.86666
2012-11-16	89	E	89	DM + A	15-30 cm	EquivSeg_Extractable_P_kg_per_ha	12.7419
2013-11-08	85	A	85	DM + A	0-7.6 cm	EquivSeg_Extractable_P_kg_per_ha	81.5301
2013-11-08	85	B	85	DM	0-7.6 cm	EquivSeg_Extractable_P_kg_per_ha	63.8667
2013-11-08	85	C	85	Urea	0-7.6 cm	EquivSeg_Extractable_P_kg_per_ha	12.6852
2013-11-08	85	D	85	SU	0-7.6 cm	EquivSeg_Extractable_P_kg_per_ha	23.9497
2013-11-08	85	E	85	Control	0-7.6 cm	EquivSeg_Extractable_P_kg_per_ha	9.17004
2013-11-08	86	A	86	DM	0-7.6 cm	EquivSeg_Extractable_P_kg_per_ha	93.3769
2013-11-08	86	B	86	DM + A	0-7.6 cm	EquivSeg_Extractable_P_kg_per_ha	97.6218
2013-11-08	86	C	86	SU	0-7.6 cm	EquivSeg_Extractable_P_kg_per_ha	11.5886
2013-11-08	86	D	86	Urea	0-7.6 cm	EquivSeg_Extractable_P_kg_per_ha	9.04724
2013-11-08	86	E	86	Control	0-7.6 cm	EquivSeg_Extractable_P_kg_per_ha	6.43865
2013-11-08	88	A	88	SU	0-7.6 cm	EquivSeg_Extractable_P_kg_per_ha	19.2805
2013-11-08	88	B	88	Urea	0-7.6 cm	EquivSeg_Extractable_P_kg_per_ha	16.7009
2013-11-08	88	C	88	Control	0-7.6 cm	EquivSeg_Extractable_P_kg_per_ha	8.93611
2013-11-08	88	D	88	DM + A	0-7.6 cm	EquivSeg_Extractable_P_kg_per_ha	72.9146
2013-11-08	88	E	88	DM	0-7.6 cm	EquivSeg_Extractable_P_kg_per_ha	67.5793
2013-11-08	89	A	89	Control	0-7.6 cm	EquivSeg_Extractable_P_kg_per_ha	29.2765
2013-11-08	89	B	89	Urea	0-7.6 cm	EquivSeg_Extractable_P_kg_per_ha	13.3858
2013-11-08	89	C	89	SU	0-7.6 cm	EquivSeg_Extractable_P_kg_per_ha	16.7234
2013-11-08	89	D	89	DM	0-7.6 cm	EquivSeg_Extractable_P_kg_per_ha	86.3528
2013-11-08	89	E	89	DM + A	0-7.6 cm	EquivSeg_Extractable_P_kg_per_ha	110.053
2013-11-08	85	A	85	DM + A	7.6-15 cm	EquivSeg_Extractable_P_kg_per_ha	59.5571
2013-11-08	85	B	85	DM	7.6-15 cm	EquivSeg_Extractable_P_kg_per_ha	41.2249
2013-11-08	85	C	85	Urea	7.6-15 cm	EquivSeg_Extractable_P_kg_per_ha	5.32828
2013-11-08	85	D	85	SU	7.6-15 cm	EquivSeg_Extractable_P_kg_per_ha	19.2262
2013-11-08	85	E	85	Control	7.6-15 cm	EquivSeg_Extractable_P_kg_per_ha	10.8065
2013-11-08	86	A	86	DM	7.6-15 cm	EquivSeg_Extractable_P_kg_per_ha	78.4538
2013-11-08	86	B	86	DM + A	7.6-15 cm	EquivSeg_Extractable_P_kg_per_ha	72.6113
2013-11-08	86	C	86	SU	7.6-15 cm	EquivSeg_Extractable_P_kg_per_ha	7.13162
2013-11-08	86	D	86	Urea	7.6-15 cm	EquivSeg_Extractable_P_kg_per_ha	4.42181
2013-11-08	86	E	86	Control	7.6-15 cm	EquivSeg_Extractable_P_kg_per_ha	5.07132
2013-11-08	88	A	88	SU	7.6-15 cm	EquivSeg_Extractable_P_kg_per_ha	11.7559
2013-11-08	88	B	88	Urea	7.6-15 cm	EquivSeg_Extractable_P_kg_per_ha	8.6403
2013-11-08	88	C	88	Control	7.6-15 cm	EquivSeg_Extractable_P_kg_per_ha	4.15619
2013-11-08	88	D	88	DM + A	7.6-15 cm	EquivSeg_Extractable_P_kg_per_ha	54.4992
2013-11-08	88	E	88	DM	7.6-15 cm	EquivSeg_Extractable_P_kg_per_ha	69.8007
2013-11-08	89	B	89	Urea	7.6-15 cm	EquivSeg_Extractable_P_kg_per_ha	10.8025
2013-11-08	89	C	89	SU	7.6-15 cm	EquivSeg_Extractable_P_kg_per_ha	9.87136
2013-11-08	89	D	89	DM	7.6-15 cm	EquivSeg_Extractable_P_kg_per_ha	87.7912
2013-11-08	89	E	89	DM + A	7.6-15 cm	EquivSeg_Extractable_P_kg_per_ha	78.5662
[truncated: 14,529 more rows]
